# Supplementary material for: High-resolution transcriptional and morphogenetic profiling of cells from micropatterned human ESC gastruloid cultures
Source: eLife journal article supplement (doi:10.7554/elife.59445), 2020-11-18
Supplement: supp [file elife-59445-supp-v1.zip]

Archive with 31 entries (31 files):
- elife_poa_e59445_Video_1.avi
- elife_poa_e59445_Source_data_1.xlsx
- elife_poa_e59445_Source_data_2.xlsx
- elife_poa_e59445_Source_data_3.xlsx
- elife_poa_e59445_Source_data_4.xlsx
- elife_poa_e59445_Source_data_5.xlsx
- elife_poa_e59445_Source_data_6.xlsx
- elife_poa_e59445_Source_data_7.xlsx
- elife_poa_e59445_Transparent_Reporting_File.docx
- elife_poa_e59445_Figure_1_figure_supplement_1.pdf
- elife_poa_e59445_Figure_1_figure_supplement_2.pdf
- elife_poa_e59445_Figure_2_figure_supplement_1.pdf
- elife_poa_e59445_Figure_2_figure_supplement_2.pdf
- elife_poa_e59445_Figure_3_figure_supplement_1.pdf
- elife_poa_e59445_Figure_3_figure_supplement_2.pdf
- elife_poa_e59445_Figure_3_figure_supplement_3.pdf
- elife_poa_e59445_Figure_3_figure_supplement_4.pdf
- elife_poa_e59445_Figure_4_figure_supplement_1.pdf
- elife_poa_e59445_Figure_4_figure_supplement_2.pdf
- elife_poa_e59445_Figure_4_figure_supplement_3.pdf
- elife_poa_e59445_Figure_4_figure_supplement_4.pdf
- elife_poa_e59445_Figure_4_figure_supplement_5.pdf
- elife_poa_e59445_Figure_4_figure_supplement_6.pdf
- elife_poa_e59445_Figure_5_figure_supplement_1.pdf
- elife_poa_e59445_Figure_7_figure_supplement_1.pdf
- elife_poa_e59445_Figure_7_figure_supplement_2.pdf
- elife_poa_e59445_Figure_8_figure_supplement_1.pdf
- elife_poa_e59445_Figure_8_figure_supplement_2.pdf
- elife_poa_e59445_Figure_8_figure_supplement_3.pdf
- elife_poa_e59445_Figure_8_figure_supplement_4.pdf
- elife_poa_e59445_Figure_8_figure_supplement_5.pdf
