# Supplementary material for: High-resolution transcriptional and morphogenetic profiling of cells from micropatterned human ESC gastruloid cultures
Source: eLife journal article supplement (doi:10.7554/elife.59445), 2020-11-18
Supplement: supp [file elife-59445-supp-v1.zip › elife_poa_e59445_Figure_2_figure_supplement_1.pdf]

Figure 2—figure supplement 1

| Experiment             | # gastruloids/micro-colonies per experiment | # of cells after QC | # genes per cell | # UMI per cell |
|------------------------|---------------------------------------------|---------------------|------------------|----------------|
| Gastruloid Replicate 1 | 36                                          | 1,722               | 5,002            | 29,962         |
| Gastruloid Replicate 2 | 36                                          | 753                 | 3,791            | 14,346         |
| 48h Reseed             | 36                                          | 479                 | 4,464            | 26,373         |
