# Supplementary material for: High-resolution transcriptional and morphogenetic profiling of cells from micropatterned human ESC gastruloid cultures
Source: eLife journal article supplement (doi:10.7554/elife.59445), 2020-11-18

# Figure 7–figure supplement 1

**A**

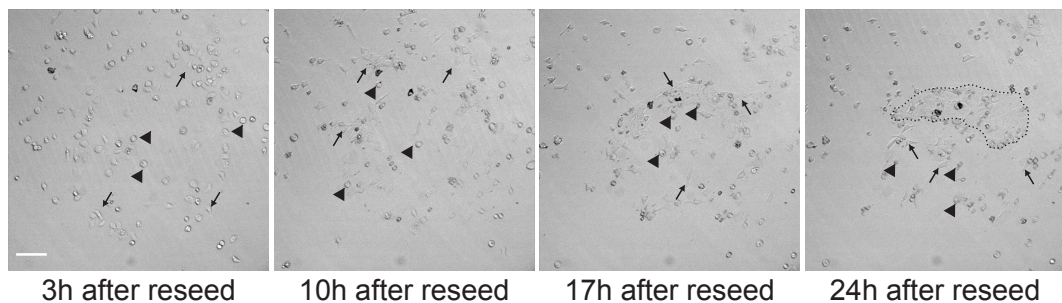

**B**

| Time after reseed | Cell density (cells/cm <sup>2</sup> ) | # cells expressing indicated markers $\pm$ SD (# of colonies) |                    |                    |                   |                     |
|-------------------|---------------------------------------|---------------------------------------------------------------|--------------------|--------------------|-------------------|---------------------|
|                   |                                       | DAPI                                                          | SOX2               | T                  | SOX17             | CDX2                |
| 24h               | 72,000                                | 618 $\pm$ 395(70)                                             | 164 $\pm$ 83(80)   | 105 $\pm$ 40(39)   | 43 $\pm$ 16(31)   | 78 $\pm$ 36(64)     |
|                   | 143,000                               | 922 $\pm$ 431(100)                                            | 319 $\pm$ 99(100)  | 176 $\pm$ 65(50)   | 77 $\pm$ 26(50)   | 136 $\pm$ 69(100)   |
|                   | 286,000                               | 1,889 $\pm$ 361(67)                                           | 484 $\pm$ 135(67)  | 236 $\pm$ 87(35)   | 54 $\pm$ 54(32)   | 240 $\pm$ 97(67)    |
| 48h               | 72,000                                | 1,016 $\pm$ 476(238)                                          | 158 $\pm$ 93(238)  | 173 $\pm$ 212(134) | 79 $\pm$ 46(104)  | 248 $\pm$ 188(238)  |
|                   | 143,000                               | 1,556 $\pm$ 595(99)                                           | 170 $\pm$ 96(99)   | 384 $\pm$ 150(58)  | 102 $\pm$ 47(41)  | 328 $\pm$ 145(99)   |
|                   | 286,000                               | 2,556 $\pm$ 754(49)                                           | 54 $\pm$ 17(49)    | 721 $\pm$ 217(33)  | 390 $\pm$ 111(16) | 1,022 $\pm$ 247(49) |
| 72h               | 72,000                                | 1,492 $\pm$ 527(121)                                          | 155 $\pm$ 128(121) | 345 $\pm$ 249(55)  | 147 $\pm$ 81(66)  | 736 $\pm$ 396(121)  |

**C**

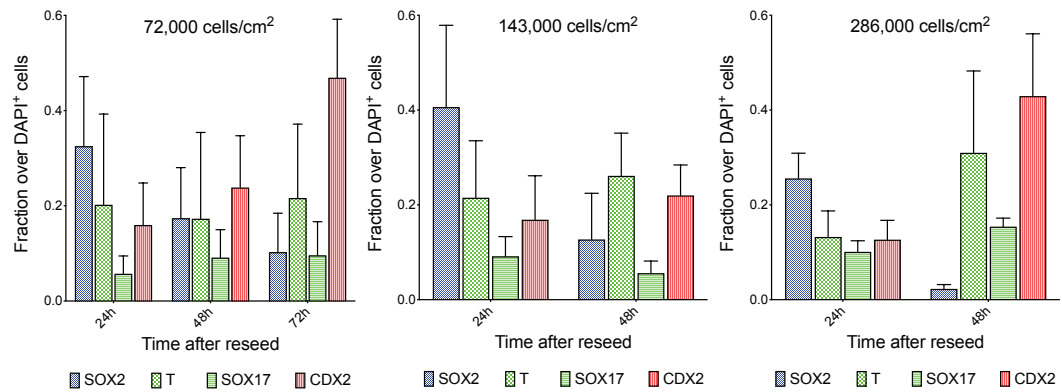

Supplement: supp [file elife-59445-supp-v1.zip › elife_poa_e59445_Figure_7_figure_supplement_1.pdf]
