# Supplementary material for: High-resolution transcriptional and morphogenetic profiling of cells from micropatterned human ESC gastruloid cultures
Source: eLife journal article supplement (doi:10.7554/elife.59445), 2020-11-18
Supplement: supp [file elife-59445-supp-v1.zip › elife_poa_e59445_Source_data_1.xlsx]

## Sheet: Gast.Metadata
Gastruloid cells metadata										Gastruloid replicate gene expression correlation values on the basis of all 23,273 genes
Cell ID	Cluster ID	Replicate ID	Predicted cynomolgous monkey cell type	Predicted cynomolgous monkey developmental stage	Predicted mouse cell type	Predicted mouse developmental stage						Replicate 1
AAACCTGTCCTCGCAT	hPGCLC	Replicate 2	E-PGC	16 dpf	Epiblast	E7						Ectoderm	EPI-like	Mesoderm-1	Mesoderm-2	Endoderm	hPGCLC	ExE-like
AAACGGGAGATGTGGC	Endoderm	Replicate 2	EXMC	11 dpf	ExE mesoderm	E7.5				Replicate 2	Ectoderm	0.843084	0.849819	0.846792	0.841784	0.836627	0.846393	0.830235
AAACGGGCACGGCTAC	Mesoderm-2	Replicate 2	EXMC	12 dpf	Nascent mesoderm	E7.25					EPI-like	0.819835	0.86397	0.855022	0.8459	0.83743	0.846867	0.819036
AAACGGGGTGTAACGG	Endoderm	Replicate 2	VE/YE	16 dpf	Anterior Primitive Streak	E7.25					Mesoderm-1	0.823971	0.859198	0.861621	0.855124	0.844796	0.851061	0.824963
AAACGGGTCGATAGAA	Mesoderm-1	Replicate 2	postL-EPI	16 dpf	Primitive Streak	E7					Mesoderm-2	0.824886	0.85216	0.860445	0.867407	0.848746	0.848163	0.824977
AAAGATGCACTAGTAC	ExE-like	Replicate 2	TE and derivatives	12 dpf	ExE ectoderm	E7.5					Endoderm	0.831794	0.854317	0.861253	0.861817	0.865528	0.862297	0.833326
AAAGCAAGTGCAACGA	Mesoderm-2	Replicate 2	EXMC	12 dpf	Nascent mesoderm	E7					hPGCLC	0.831292	0.852683	0.856751	0.851039	0.853195	0.871302	0.838772
AAAGCAATCTCGATGA	hPGCLC	Replicate 2	E-PGC	16 dpf	Epiblast	E6.5					ExE-like	0.829125	0.832982	0.836061	0.833167	0.827552	0.843611	0.858989
AAAGTAGAGAGGGATA	Mesoderm-1	Replicate 2	L-Gast1	16 dpf	Primitive Streak	E7.25
AAAGTAGCACCACGTG	EPI-like	Replicate 2	postE-EPI	14 dpf	Epiblast	E7
AAATGCCTCTAACTCT	Mesoderm-1	Replicate 2	E-Gast	14 dpf	Primitive Streak	E7
AACCATGCAAGCGATG	EPI-like	Replicate 2	postE-EPI	14 dpf	Epiblast	E7
AACCATGGTCATCCCT	Ectoderm	Replicate 2	postL-EPI	17 dpf	Rostral neurectoderm	E7.5
AACCATGTCCTCAATT	hPGCLC	Replicate 2	E-PGC	16 dpf	ExE endoderm	E7.5
AACCGCGAGGATTCGG	hPGCLC	Replicate 2	E-PGC	16 dpf	Epiblast	E6.5
AACGTTGCACTTAACG	Mesoderm-2	Replicate 2	EXMC	12 dpf	Nascent mesoderm	E7.25
AACGTTGGTCGATTGT	Mesoderm-2	Replicate 2	VE/YE	16 dpf	Nascent mesoderm	E7
AACGTTGTCGACGGAA	EPI-like	Replicate 2	postE-EPI	16 dpf	Epiblast	E7.25
AACTCAGGTAAGGGAA	Mesoderm-1	Replicate 2	L-Gast1	16 dpf	Primitive Streak	E7
AACTCAGTCATCATTC	Mesoderm-1	Replicate 2	L-Gast1	16 dpf	Primitive Streak	E7.25
AACTCCCGTATAGGTA	hPGCLC	Replicate 2	E-PGC	16 dpf	Epiblast	E7
AACTCCCGTGACTCAT	Mesoderm-2	Replicate 2	EXMC	12 dpf	Nascent mesoderm	E7
AACTCCCTCTGGGCCA	Mesoderm-2	Replicate 2	VE/YE	16 dpf	Anterior Primitive Streak	E7
AACTCTTGTTTAAGCC	Mesoderm-1	Replicate 2	E-AM	12 dpf	Epiblast	E7
AACTGGTAGATCGGGT	Endoderm	Replicate 2	E-Gast	16 dpf	Anterior Primitive Streak	E7.5
AACTGGTGTAAATGAC	hPGCLC	Replicate 2	E-PGC	16 dpf	Epiblast	E7
AACTTTCAGCTAGCCC	ExE-like	Replicate 2	L-AM2	16 dpf	ExE ectoderm	E7.25
AACTTTCAGTGTGAAT	EPI-like	Replicate 2	postE-EPI	14 dpf	ExE ectoderm	E7.5
AAGCCGCTCCCTTGCA	Mesoderm-2	Replicate 2	VE/YE	16 dpf	Anterior Primitive Streak	E7
AAGGAGCGTCAGAAGC	Mesoderm-2	Replicate 2	L-Gast2	16 dpf	Nascent mesoderm	E7
AAGGAGCTCTCGGACG	hPGCLC	Replicate 2	E-PGC	16 dpf	Epiblast	E6.5
AAGGCAGTCATCACCC	Mesoderm-2	Replicate 2	VE/YE	16 dpf	Nascent mesoderm	E7.5
AAGGCAGTCCTCATTA	Mesoderm-2	Replicate 2	EXMC	12 dpf	Nascent mesoderm	E7.25
AAGGCAGTCGTTTAGG	hPGCLC	Replicate 2	E-PGC	16 dpf	Epiblast	E6.5
ACACCAAAGAAACCTA	EPI-like	Replicate 2	postE-EPI	14 dpf	Epiblast	E7
ACACCAAAGTTAACGA	ExE-like	Replicate 2	L-AM2	16 dpf	ExE ectoderm	E7.25
ACACCAATCATAGCAC	Mesoderm-1	Replicate 2	L-Gast1	16 dpf	Nascent mesoderm	E7
ACACTGACACAAGTAA	Mesoderm-2	Replicate 2	VE/YE	16 dpf	Anterior Primitive Streak	E7.25
ACACTGACACGTCTCT	Endoderm	Replicate 2	L-Gast1	16 dpf	Anterior Primitive Streak	E7.25
ACAGCTACACATAACC	EPI-like	Replicate 2	postE-EPI	14 dpf	Epiblast	E7.5
ACATACGCAATGTTGC	hPGCLC	Replicate 2	E-AM	12 dpf	ExE ectoderm	E7.5
ACATACGCAGTATGCT	EPI-like	Replicate 2	postE-EPI	16 dpf	Epiblast	E6.5
ACATACGCATCACGTA	Endoderm	Replicate 2	EXMC	14 dpf	Paraxial mesoderm	E7.5
ACATACGGTACTCTCC	Mesoderm-1	Replicate 2	L-Gast1	16 dpf	Caudal epiblast	E7.5
ACATCAGGTAACGTTC	ExE-like	Replicate 2	TE and derivatives	12 dpf	ExE ectoderm	E6.5
ACCAGTAAGCTAGTCT	Mesoderm-2	Replicate 2	EXMC	16 dpf	Nascent mesoderm	E7
ACCAGTACAGGAACGT	Mesoderm-1	Replicate 2	postE-EPI	14 dpf	Epiblast	E7
ACCAGTATCAGATAAG	Mesoderm-2	Replicate 2	L-Gast1	16 dpf	Anterior Primitive Streak	E7
ACCCACTAGGCGATAC	hPGCLC	Replicate 2	E-PGC	16 dpf	Epiblast	E6.5
ACCCACTTCAGGCGAA	hPGCLC	Replicate 2	E-PGC	16 dpf	Epiblast	E7.25
ACCCACTTCTCGTATT	hPGCLC	Replicate 2	E-PGC	16 dpf	Epiblast	E7.25
ACCGTAAAGTCCGTAT	EPI-like	Replicate 2	postE-EPI	14 dpf	Primitive Streak	E7.25
ACCGTAATCGATCCCT	Endoderm	Replicate 2	E-Gast	13 dpf	Def. endoderm	E7
ACCTTTACAGACAGGT	Mesoderm-1	Replicate 2	L-Gast1	16 dpf	Primitive Streak	E7.25
ACCTTTAGTGGAAAGA	Ectoderm	Replicate 2	postL-EPI	17 dpf	Rostral neurectoderm	E7.5
ACGAGCCCACCACGTG	Mesoderm-1	Replicate 2	L-Gast1	16 dpf	Primitive Streak	E7
ACGAGCCTCCCTCTTT	ExE-like	Replicate 2	TE and derivatives	16 dpf	ExE ectoderm	E7
ACGAGGAAGTTTAGGA	EPI-like	Replicate 2	postL-EPI	16 dpf	Epiblast	E7.25
ACGATGTAGATAGCAT	Endoderm	Replicate 2	EXMC	16 dpf	Nascent mesoderm	E7
ACGATGTAGGTGCTAG	Mesoderm-2	Replicate 2	L-Gast2	16 dpf	Nascent mesoderm	E7
ACGATGTCACGAGGTA	Mesoderm-1	Replicate 2	E-Gast	16 dpf	Primitive Streak	E7.25
ACGCAGCAGACCACGA	Mesoderm-2	Replicate 2	EXMC	12 dpf	Nascent mesoderm	E7.5
ACGCAGCTCTCATTCA	Mesoderm-1	Replicate 2	L-Gast1	16 dpf	Nascent mesoderm	E7
ACGCCAGAGAAGGTTT	hPGCLC	Replicate 2	E-Gast	14 dpf	Epiblast	E7
ACGCCAGAGGCCCGTT	Mesoderm-2	Replicate 2	EXMC	12 dpf	Mixed mesoderm	E7.5
ACGCCGACACAGGCCT	Endoderm	Replicate 2	VE/YE	16 dpf	Def. endoderm	E7.5
ACGCCGAGTCTCATCC	EPI-like	Replicate 2	postE-EPI	14 dpf	Epiblast	E7
ACGCCGAGTTGGTTTG	Mesoderm-2	Replicate 2	EXMC	16 dpf	Nascent mesoderm	E7.25
ACGGAGACACGGACAA	Endoderm	Replicate 2	EXMC	14 dpf	Epiblast	E7.25
ACGGCCACATATGGTC	ExE-like	Replicate 2	TE and derivatives	12 dpf	ExE ectoderm	E7.25
ACGGCCAGTAAGTTCC	EPI-like	Replicate 2	postE-EPI	14 dpf	Epiblast	E7
ACGGGCTAGGCTCTTA	EPI-like	Replicate 2	postE-EPI	14 dpf	Epiblast	E7
ACGGGCTGTAGAGTGC	Mesoderm-1	Replicate 2	postE-EPI	16 dpf	Epiblast	E7.25
ACGGGCTTCCTCTAGC	Mesoderm-2	Replicate 2	EXMC	11 dpf	Nascent mesoderm	E7.25
ACGGGTCAGAAGCCCA	Mesoderm-1	Replicate 2	E-Gast	14 dpf	Epiblast	E7
ACGGGTCAGTAGTGCG	Endoderm	Replicate 2	VE/YE	16 dpf	Def. endoderm	E7.5
ACGGGTCTCTTGTCAT	ExE-like	Replicate 2	E-AM	12 dpf	ExE ectoderm	E7
ACGTCAAAGCTGCCCA	Mesoderm-2	Replicate 2	L-Gast2	16 dpf	Nascent mesoderm	E7.25
ACTGAACCAGCCACCA	ExE-like	Replicate 2	TE and derivatives	13 dpf	ExE ectoderm	E7.5
ACTGAACCATATGCTG	ExE-like	Replicate 2	TE and derivatives	16 dpf	ExE ectoderm	E6.5
ACTGAACCATCACCCT	EPI-like	Replicate 2	postE-EPI	16 dpf	Rostral neurectoderm	E7.5
ACTGAACCATGGGAAC	EPI-like	Replicate 2	postE-EPI	14 dpf	Primitive Streak	E7
ACTGAACGTCAGAAGC	Endoderm	Replicate 2	EXMC	16 dpf	Primitive Streak	E7
ACTGAACGTCTAGTGT	ExE-like	Replicate 2	TE and derivatives	14 dpf	ExE ectoderm	E7.25
ACTGAGTGTCAGATAA	hPGCLC	Replicate 2	E-PGC	16 dpf	Epiblast	E7.25
ACTGATGAGATCTGCT	EPI-like	Replicate 2	postE-EPI	14 dpf	Epiblast	E6.5
ACTGCTCGTAGGCTGA	ExE-like	Replicate 2	L-AM2	16 dpf	ExE ectoderm	E7.25
ACTTACTCAAGTCTAC	ExE-like	Replicate 2	L-AM2	16 dpf	ExE endoderm	E7
ACTTGTTGTATAGGTA	Mesoderm-1	Replicate 2	L-Gast1	16 dpf	Primitive Streak	E7.25
ACTTGTTGTCTAGAGG	Mesoderm-1	Replicate 2	L-Gast1	16 dpf	Caudal epiblast	E7.5
ACTTTCAAGACCGGAT	hPGCLC	Replicate 2	E-PGC	16 dpf	ExE endoderm	E7.5
ACTTTCACACAAGTAA	Mesoderm-2	Replicate 2	EXMC	12 dpf	Nascent mesoderm	E7
ACTTTCACACGAAATA	Mesoderm-2	Replicate 2	L-Gast2	16 dpf	Nascent mesoderm	E7
AGAATAGAGATCACGG	Mesoderm-2	Replicate 2	EXMC	12 dpf	Nascent mesoderm	E7.25
AGAGCGAAGGACATTA	Ectoderm	Replicate 2	postL-EPI	17 dpf	Rostral neurectoderm	E7.5
AGAGCGACATAACCTG	EPI-like	Replicate 2	postE-EPI	14 dpf	Epiblast	E7
AGAGCGAGTTCCATGA	Mesoderm-2	Replicate 2	EXMC	16 dpf	Anterior Primitive Streak	E7
AGAGCTTCACCGAATT	ExE-like	Replicate 2	TE and derivatives	12 dpf	ExE ectoderm	E7.25
AGAGCTTCACTATCTT	Mesoderm-1	Replicate 2	postE-EPI	16 dpf	Primitive Streak	E7.25
AGAGTGGGTAGCGTCC	Ectoderm	Replicate 2	TE and derivatives	12 dpf	ExE ectoderm	E7.5
AGAGTGGGTATATGAG	EPI-like	Replicate 2	postL-EPI	16 dpf	Epiblast	E7.5
AGAGTGGGTCTCGTTC	EPI-like	Replicate 2	postE-EPI	14 dpf	Epiblast	E7
AGATCTGCAATGACCT	hPGCLC	Replicate 2	E-PGC	16 dpf	Primitive Streak	E7.25
AGATCTGCATCCCATC	ExE-like	Replicate 2	L-AM2	16 dpf	ExE ectoderm	E7.25
AGATCTGGTTTGGGCC	EPI-like	Replicate 2	postL-EPI	16 dpf	Epiblast	E7
AGCAGCCAGGGTCGAT	Mesoderm-1	Replicate 2	E-Gast	14 dpf	Nascent mesoderm	E7.25
AGCAGCCCATTACCTT	Mesoderm-1	Replicate 2	L-Gast1	16 dpf	Primitive Streak	E7
AGCGGTCAGATGCGAC	EPI-like	Replicate 2	postE-EPI	14 dpf	Primitive Streak	E7.25
AGCGGTCGTAGTGAAT	hPGCLC	Replicate 2	E-PGC	16 dpf	Epiblast	E6.5
AGCGTATGTTAAGTAG	hPGCLC	Replicate 2	E-PGC	16 dpf	Epiblast	E7.25
AGCGTCGCAAGGACTG	hPGCLC	Replicate 2	E-PGC	16 dpf	Epiblast	E7
AGCGTCGGTTGAACTC	hPGCLC	Replicate 2	E-PGC	16 dpf	Epiblast	E6.5
AGCTCCTAGAATGTTG	ExE-like	Replicate 2	TE and derivatives	12 dpf	ExE ectoderm	E7.5
AGCTCCTAGTTGCAGG	hPGCLC	Replicate 2	E-PGC	16 dpf	Epiblast	E7.25
AGCTCCTGTAAGTGGC	Mesoderm-2	Replicate 2	EXMC	16 dpf	Nascent mesoderm	E7
AGCTCTCGTAGCGCTC	ExE-like	Replicate 2	TE and derivatives	16 dpf	ExE ectoderm	E7.25
AGCTCTCGTTCAGGCC	Mesoderm-1	Replicate 2	E-Gast	14 dpf	Epiblast	E7
AGCTTGAGTGACGCCT	Endoderm	Replicate 2	L-Gast2	16 dpf	Nascent mesoderm	E7
AGCTTGATCGTCCAGG	ExE-like	Replicate 2	TE and derivatives	12 dpf	ExE ectoderm	E7.5
AGGCCGTCATCCGGGT	Mesoderm-2	Replicate 2	VE/YE	16 dpf	Anterior Primitive Streak	E7
AGGCCGTTCTCACATT	Mesoderm-2	Replicate 2	L-Gast2	16 dpf	Nascent mesoderm	E7
AGGGAGTCAACTGCTA	Mesoderm-2	Replicate 2	L-Gast2	16 dpf	Nascent mesoderm	E7
AGGGATGCACAAGCCC	Mesoderm-2	Replicate 2	L-Gast1	16 dpf	Anterior Primitive Streak	E7.25
AGGTCATCAGGTGGAT	Mesoderm-2	Replicate 2	EXMC	12 dpf	Nascent mesoderm	E7.25
AGGTCATCATATACGC	Mesoderm-1	Replicate 2	L-Gast1	16 dpf	Primitive Streak	E7.25
AGGTCCGCAATCTACG	hPGCLC	Replicate 2	E-PGC	16 dpf	ExE ectoderm	E7
AGGTCCGTCACCACCT	Ectoderm	Replicate 2	EXMC	17 dpf	ExE mesoderm	E7.25
AGTCTTTCAGCGTAAG	Mesoderm-1	Replicate 2	L-Gast2	16 dpf	Intermediate mesoderm	E7.5
AGTCTTTTCACGCATA	Ectoderm	Replicate 2	EXMC	17 dpf	Mesenchyme	E7.5
AGTGGGACAGACACTT	Ectoderm	Replicate 2	postL-EPI	17 dpf	Rostral neurectoderm	E7.5
AGTGGGATCCCGGATG	Endoderm	Replicate 2	EXMC	14 dpf	Epiblast	E7.25
AGTGTCACACCTCGGA	ExE-like	Replicate 2	L-AM2	16 dpf	ExE ectoderm	E7.25
AGTGTCAGTTAAGAAC	Mesoderm-2	Replicate 2	VE/YE	16 dpf	Anterior Primitive Streak	E7
AGTGTCATCATGCTCC	Mesoderm-1	Replicate 2	postE-EPI	14 dpf	Primitive Streak	E7.25
AGTTGGTGTACCGTAT	EPI-like	Replicate 2	postE-EPI	14 dpf	Primitive Streak	E6.5
AGTTGGTTCTAACTCT	Mesoderm-2	Replicate 2	L-Gast2	16 dpf	Nascent mesoderm	E7.25
ATAACGCAGCGCTTAT	hPGCLC	Replicate 2	E-PGC	16 dpf	Epiblast	E7.25
ATAACGCGTACCGAGA	hPGCLC	Replicate 2	E-PGC	16 dpf	Epiblast	E7
ATAACGCTCCTCTAGC	Ectoderm	Replicate 2	EXMC	17 dpf	Mesenchyme	E7.5
ATAAGAGGTAATCACC	EPI-like	Replicate 2	postE-EPI	14 dpf	Epiblast	E7
ATAAGAGGTCAGCTAT	ExE-like	Replicate 2	L-AM2	16 dpf	ExE endoderm	E7
ATAGACCGTGACTCAT	ExE-like	Replicate 2	TE and derivatives	12 dpf	ExE endoderm	E7
ATAGACCTCCGCGTTT	Mesoderm-1	Replicate 2	L-Gast1	16 dpf	Nascent mesoderm	E7
ATCATGGAGTGACTCT	hPGCLC	Replicate 2	E-PGC	16 dpf	Epiblast	E7.25
ATCATGGCAGGCGATA	Mesoderm-2	Replicate 2	EXMC	12 dpf	Nascent mesoderm	E7
ATCCGAAGTTACGCGC	Mesoderm-1	Replicate 2	E-Gast	12 dpf	ExE ectoderm	E7.5
ATCCGAATCTTCGAGA	EPI-like	Replicate 2	postL-EPI	16 dpf	Epiblast	E6.5
ATCTACTCACCAGCAC	ExE-like	Replicate 2	L-AM2	16 dpf	ExE ectoderm	E7
ATCTACTCACGCCAGT	hPGCLC	Replicate 2	E-PGC	16 dpf	ExE ectoderm	E7.25
ATTACTCCAATAGCGG	Ectoderm	Replicate 2	postL-EPI	17 dpf	Rostral neurectoderm	E7.5
ATTATCCGTCTCAACA	Ectoderm	Replicate 2	EXMC	17 dpf	Mesenchyme	E7.25
ATTATCCTCTTGACGA	hPGCLC	Replicate 2	E-PGC	16 dpf	Primitive Streak	E7.5
ATTCTACCAGTATAAG	Mesoderm-2	Replicate 2	VE/YE	16 dpf	Primitive Streak	E7
ATTGGACAGACACGAC	EPI-like	Replicate 2	postE-EPI	14 dpf	Epiblast	E7.5
ATTGGTGGTCAGTGGA	EPI-like	Replicate 2	postE-EPI	14 dpf	Epiblast	E7
ATTGGTGTCCACGTTC	hPGCLC	Replicate 2	E-PGC	16 dpf	Epiblast	E6.5
ATTTCTGAGAGTTGGC	Mesoderm-2	Replicate 2	EXMC	12 dpf	Nascent mesoderm	E7
ATTTCTGGTCCAACTA	EPI-like	Replicate 2	postE-EPI	14 dpf	Epiblast	E7
CAACCAATCGAATGGG	ExE-like	Replicate 2	TE and derivatives	16 dpf	ExE ectoderm	E7.5
CAACCTCTCCGAGCCA	hPGCLC	Replicate 2	E-PGC	16 dpf	Epiblast	E6.5
CAACTAGTCCACGTGG	Endoderm	Replicate 2	VE/YE	16 dpf	Nascent mesoderm	E7.25
CAACTAGTCGAGAGCA	Mesoderm-1	Replicate 2	postE-EPI	16 dpf	Primitive Streak	E7.25
CAAGAAACAACACCCG	Ectoderm	Replicate 2	EXMC	17 dpf	Mesenchyme	E7.5
CAAGAAACATCCCATC	Mesoderm-1	Replicate 2	L-Gast1	16 dpf	Primitive Streak	E7
CAAGAAATCGAATCCA	ExE-like	Replicate 2	L-AM2	16 dpf	ExE endoderm	E7
CAAGATCAGCAATATG	EPI-like	Replicate 2	postE-EPI	14 dpf	Epiblast	E6.5
CAAGATCCACCAGGTC	Mesoderm-1	Replicate 2	postE-EPI	14 dpf	Anterior Primitive Streak	E7.25
CAAGATCCACTCAGGC	hPGCLC	Replicate 2	E-AM	16 dpf	Epiblast	E6.5
CAAGATCGTAATAGCA	Mesoderm-2	Replicate 2	EXMC	12 dpf	Nascent mesoderm	E7.5
CAAGGCCTCGCTTGTC	Mesoderm-2	Replicate 2	EXMC	12 dpf	Mixed mesoderm	E7.25
CACAAACAGTACACCT	Ectoderm	Replicate 2	EXMC	17 dpf	Mesenchyme	E7.5
CACAAACGTGATGTGG	hPGCLC	Replicate 2	E-Gast	14 dpf	Epiblast	E7
CACACCTTCAGCTGGC	Ectoderm	Replicate 2	EXMC	17 dpf	ExE mesoderm	E7.5
CACACTCAGCCGATTT	Ectoderm	Replicate 2	postL-EPI	17 dpf	Epiblast	E7
CACACTCTCTTCTGGC	ExE-like	Replicate 2	TE and derivatives	16 dpf	ExE ectoderm	E7.25
CACAGGCGTACATGTC	Mesoderm-2	Replicate 2	EXMC	12 dpf	Nascent mesoderm	E7
CACAGGCTCAAACAAG	hPGCLC	Replicate 2	E-PGC	16 dpf	Epiblast	E7.25
CACAGTACAATAAGCA	ExE-like	Replicate 2	L-AM2	16 dpf	ExE ectoderm	E7.5
CACATAGTCTTCTGGC	Mesoderm-2	Replicate 2	EXMC	12 dpf	Nascent mesoderm	E7
CACATTTGTACTTCTT	EPI-like	Replicate 2	postE-EPI	14 dpf	Epiblast	E7
CACATTTTCGCTAGCG	EPI-like	Replicate 2	postL-EPI	16 dpf	Epiblast	E7
CACCAGGGTACCGTTA	ExE-like	Replicate 2	L-AM2	16 dpf	ExE ectoderm	E7
CACCAGGTCGTACGGC	Endoderm	Replicate 2	VE/YE	14 dpf	Def. endoderm	E7.25
CACCTTGAGCTAGCCC	Mesoderm-1	Replicate 2	L-Gast1	16 dpf	Nascent mesoderm	E7
CACCTTGCAGGTGGAT	ExE-like	Replicate 2	TE and derivatives	12 dpf	ExE ectoderm	E7
CACCTTGGTAGGCTGA	Mesoderm-1	Replicate 2	E-Gast	16 dpf	Nascent mesoderm	E7.5
CAGAATCGTACTCGCG	ExE-like	Replicate 2	TE and derivatives	16 dpf	ExE endoderm	E7
CAGAGAGAGACAGACC	EPI-like	Replicate 2	postE-EPI	14 dpf	Epiblast	E7.25
CAGAGAGAGCCTCGTG	Mesoderm-2	Replicate 2	L-Gast2	16 dpf	Nascent mesoderm	E7
CAGAGAGCAAACCCAT	Endoderm	Replicate 2	VE/YE	16 dpf	Anterior Primitive Streak	E7.25
CAGATCACAAAGGAAG	ExE-like	Replicate 2	TE and derivatives	14 dpf	ExE ectoderm	E7.5
CAGATCATCCTTTACA	hPGCLC	Replicate 2	E-PGC	16 dpf	Gut	E7.5
CAGCAGCAGACAAGCC	Ectoderm	Replicate 2	EXMC	17 dpf	Mesenchyme	E7.5
CAGCAGCGTCAGATAA	hPGCLC	Replicate 2	E-PGC	16 dpf	ExE endoderm	E7
CAGCAGCGTGCGGTAA	hPGCLC	Replicate 2	E-PGC	16 dpf	Epiblast	E6.5
CAGCCGACAGGTCGTC	Mesoderm-2	Replicate 2	EXMC	12 dpf	Nascent mesoderm	E7.5
CAGCCGAGTGATGTGG	ExE-like	Replicate 2	TE and derivatives	11 dpf	ExE ectoderm	E7.5
CAGCCGATCGTTTAGG	EPI-like	Replicate 2	postL-EPI	16 dpf	Epiblast	E7.5
CAGCTGGAGAGGGATA	Mesoderm-2	Replicate 2	EXMC	12 dpf	Mixed mesoderm	E7.25
CAGCTGGAGAGGTTGC	Mesoderm-1	Replicate 2	L-Gast1	16 dpf	Primitive Streak	E7
CAGCTGGTCTACGAGT	ExE-like	Replicate 2	TE and derivatives	12 dpf	ExE ectoderm	E7.5
CAGGTGCGTGTGTGCC	hPGCLC	Replicate 2	E-PGC	16 dpf	ExE endoderm	E7
CAGGTGCGTTCGCTAA	Ectoderm	Replicate 2	EXMC	17 dpf	Mesenchyme	E7.5
CAGTAACCACCTGGTG	EPI-like	Replicate 2	postE-EPI	14 dpf	Epiblast	E7
CATATTCAGATAGGAG	Endoderm	Replicate 2	VE/YE	16 dpf	ExE endoderm	E7
CATCAAGTCCTAGTGA	hPGCLC	Replicate 2	E-PGC	16 dpf	Epiblast	E6.5
CATCAAGTCGTTACGA	hPGCLC	Replicate 2	E-PGC	16 dpf	Epiblast	E6.5
CATCCACGTATAAACG	Mesoderm-1	Replicate 2	E-Gast	14 dpf	Primitive Streak	E7.25
CATCCACTCACCTCGT	Mesoderm-2	Replicate 2	EXMC	11 dpf	Mixed mesoderm	E7.25
CATCGAAGTTCCACTC	Mesoderm-2	Replicate 2	EXMC	11 dpf	Mixed mesoderm	E7.25
CATCGAATCTCCAACC	Endoderm	Replicate 2	L-Gast2	16 dpf	Anterior Primitive Streak	E7
CATCGGGGTCTAGTCA	ExE-like	Replicate 2	TE and derivatives	12 dpf	ExE ectoderm	E7.5
CATGACAAGATATACG	ExE-like	Replicate 2	L-AM2	16 dpf	ExE ectoderm	E7
CATGACATCAGCAACT	EPI-like	Replicate 2	postE-EPI	14 dpf	Epiblast	E7
CATGCCTAGGTCGGAT	Mesoderm-2	Replicate 2	VE/YE	16 dpf	Anterior Primitive Streak	E7
CATGCCTCAGCTGTGC	ExE-like	Replicate 2	TE and derivatives	14 dpf	ExE ectoderm	E7.25
CATGCCTTCAGCTCGG	Mesoderm-2	Replicate 2	EXMC	12 dpf	Nascent mesoderm	E7.5
CATGGCGCAGATGAGC	ExE-like	Replicate 2	TE and derivatives	12 dpf	ExE ectoderm	E7
CATTCGCGTGCGAAAC	Mesoderm-2	Replicate 2	EXMC	12 dpf	Nascent mesoderm	E7.25
CATTCGCGTGTGCCTG	ExE-like	Replicate 2	E-AM	12 dpf	ExE endoderm	E7.5
CCAATCCAGCGTCAAG	Mesoderm-2	Replicate 2	L-Gast2	16 dpf	Nascent mesoderm	E7.25
CCACGGACATCACAAC	EPI-like	Replicate 2	postE-EPI	14 dpf	Epiblast	E7
CCACGGACATGCCTTC	Endoderm	Replicate 2	VE/YE	16 dpf	ExE endoderm	E7.5
CCACGGAGTCATGCCG	EPI-like	Replicate 2	postE-EPI	16 dpf	Epiblast	E7
CCACTACTCGGAAATA	Ectoderm	Replicate 2	postL-EPI	17 dpf	Epiblast	E7
CCAGCGACAAACGCGA	Ectoderm	Replicate 2	EXMC	17 dpf	Mesenchyme	E7.25
CCAGCGACAAGACACG	EPI-like	Replicate 2	postE-EPI	14 dpf	Epiblast	E6.5
CCATGTCCAGACAGGT	ExE-like	Replicate 2	E-AM	12 dpf	ExE ectoderm	E6.5
CCATTCGCATCGATGT	Ectoderm	Replicate 2	EXMC	17 dpf	Mesenchyme	E7.5
CCATTCGGTCTCCCTA	ExE-like	Replicate 2	TE and derivatives	12 dpf	ExE ectoderm	E7
CCATTCGTCTTAGAGC	Mesoderm-2	Replicate 2	EXMC	16 dpf	Nascent mesoderm	E7
CCCAATCCACACCGAC	hPGCLC	Replicate 2	E-PGC	16 dpf	Epiblast	E6.5
CCCAATCGTAGAAGGA	Endoderm	Replicate 2	VE/YE	16 dpf	Anterior Primitive Streak	E7.25
CCCAATCTCCGCATCT	EPI-like	Replicate 2	postE-EPI	16 dpf	Epiblast	E7
CCCAGTTAGCAGCCTC	Mesoderm-1	Replicate 2	E-Gast	16 dpf	Epiblast	E7
CCCAGTTGTGCCTGGT	EPI-like	Replicate 2	postE-EPI	16 dpf	ExE ectoderm	E7.5
CCCATACTCACGATGT	Mesoderm-2	Replicate 2	EXMC	12 dpf	Nascent mesoderm	E7.25
CCCTCCTAGGGAACGG	Mesoderm-2	Replicate 2	VE/YE	16 dpf	Nascent mesoderm	E7.25
CCCTCCTTCAAACCGT	ExE-like	Replicate 2	TE and derivatives	12 dpf	ExE ectoderm	E7.25
CCGGGATTCCACGTGG	EPI-like	Replicate 2	postL-EPI	16 dpf	ExE ectoderm	E7.5
CCGGTAGAGTGGTCCC	Endoderm	Replicate 2	VE/YE	16 dpf	Def. endoderm	E7.25
CCGGTAGCAGGGAGAG	Mesoderm-2	Replicate 2	EXMC	12 dpf	Nascent mesoderm	E7
CCGGTAGCATTAGGCT	hPGCLC	Replicate 2	E-PGC	16 dpf	Epiblast	E7.5
CCGGTAGGTCATCGGC	hPGCLC	Replicate 2	E-PGC	16 dpf	Epiblast	E6.5
CCGGTAGTCGTTGCCT	ExE-like	Replicate 2	E-AM	12 dpf	ExE ectoderm	E7.5
CCGTACTAGCTTATCG	Mesoderm-2	Replicate 2	L-Gast2	16 dpf	Nascent mesoderm	E7
CCGTACTCAAACGCGA	ExE-like	Replicate 2	TE and derivatives	12 dpf	ExE ectoderm	E7
CCGTACTCAGACAAGC	Ectoderm	Replicate 2	postL-EPI	17 dpf	Mesenchyme	E7.5
CCGTGGACAGATGAGC	hPGCLC	Replicate 2	E-PGC	16 dpf	Rostral neurectoderm	E7.5
CCGTGGATCGAACGGA	ExE-like	Replicate 2	L-AM2	16 dpf	ExE ectoderm	E7.25
CCGTTCAAGTGATCGG	ExE-like	Replicate 2	TE and derivatives	14 dpf	ExE ectoderm	E7.25
CCTAAAGAGTCAAGCG	EPI-like	Replicate 2	postE-EPI	14 dpf	Epiblast	E7
CCTAAAGGTAATCGTC	Ectoderm	Replicate 2	postL-EPI	17 dpf	Rostral neurectoderm	E7.5
CCTAAAGGTCGGGTCT	Mesoderm-1	Replicate 2	postE-EPI	14 dpf	Primitive Streak	E7.25
CCTAAAGTCGTGGGAA	ExE-like	Replicate 2	TE and derivatives	12 dpf	ExE ectoderm	E6.5
CCTACACAGGAATTAC	ExE-like	Replicate 2	L-AM2	16 dpf	ExE ectoderm	E7.25
CCTACACAGTTTAGGA	Endoderm	Replicate 2	L-Gast1	16 dpf	Def. endoderm	E7.25
CCTACACGTCTCCCTA	Mesoderm-2	Replicate 2	EXMC	12 dpf	Nascent mesoderm	E7.25
CCTACCATCCAAGTAC	ExE-like	Replicate 2	E-AM	12 dpf	ExE ectoderm	E7.5
CCTATTATCAGTTAGC	hPGCLC	Replicate 2	E-PGC	16 dpf	ExE ectoderm	E7
CCTTCCCCAAAGCGGT	EPI-like	Replicate 2	postE-EPI	14 dpf	Epiblast	E6.5
CCTTCCCCACGAAGCA	Mesoderm-2	Replicate 2	L-Gast2	16 dpf	Nascent mesoderm	E7.25
CCTTCCCGTTCTGAAC	hPGCLC	Replicate 2	E-PGC	16 dpf	Epiblast	E7.25
CCTTCGACATTCACTT	Mesoderm-1	Replicate 2	E-Gast	12 dpf	Nascent mesoderm	E7
CCTTCGAGTGTATGGG	Ectoderm	Replicate 2	EXMC	17 dpf	ExE mesoderm	E7.5
CGAATGTAGTGATCGG	Endoderm	Replicate 2	EXMC	14 dpf	Def. endoderm	E7
CGACCTTCACATTTCT	EPI-like	Replicate 2	postE-EPI	16 dpf	Epiblast	E7
CGACCTTGTGTGACGA	ExE-like	Replicate 2	TE and derivatives	14 dpf	ExE ectoderm	E7.25
CGACTTCCACATGACT	hPGCLC	Replicate 2	E-Gast	12 dpf	Rostral neurectoderm	E7.5
CGACTTCTCAACCATG	Mesoderm-2	Replicate 2	EXMC	16 dpf	Nascent mesoderm	E7.5
CGACTTCTCCACGTGG	hPGCLC	Replicate 2	E-PGC	16 dpf	Epiblast	E7
CGACTTCTCCCAACGG	Ectoderm	Replicate 2	postL-EPI	17 dpf	Rostral neurectoderm	E7.5
CGAGAAGGTCTGCCAG	hPGCLC	Replicate 2	E-AM	16 dpf	Epiblast	E6.5
CGAGAAGTCCTGCTTG	hPGCLC	Replicate 2	E-PGC	16 dpf	Epiblast	E7
CGAGCACTCCACGTGG	Mesoderm-2	Replicate 2	EXMC	12 dpf	Nascent mesoderm	E7.25
CGAGCCAGTGCAGTAG	hPGCLC	Replicate 2	E-PGC	16 dpf	PGC	E7.5
CGATCGGGTGGAAAGA	hPGCLC	Replicate 2	E-PGC	16 dpf	Epiblast	E7.5
CGATCGGGTGTTAAGA	Mesoderm-2	Replicate 2	EXMC	12 dpf	Nascent mesoderm	E7.5
CGATCGGGTTCCGGCA	ExE-like	Replicate 2	E-AM	12 dpf	ExE endoderm	E7.5
CGATGGCTCTTGGGTA	ExE-like	Replicate 2	E-AM	12 dpf	ExE ectoderm	E7.5
CGATGTAAGGCTATCT	Ectoderm	Replicate 2	postL-EPI	17 dpf	Nascent mesoderm	E7.5
CGATGTATCTCACATT	ExE-like	Replicate 2	E-AM	12 dpf	ExE ectoderm	E7.5
CGATTGACAACCGCCA	EPI-like	Replicate 2	postL-EPI	16 dpf	Epiblast	E7
CGATTGAGTAGCACGA	ExE-like	Replicate 2	TE and derivatives	12 dpf	ExE endoderm	E7
CGATTGATCCTAGGGC	Mesoderm-2	Replicate 2	EXMC	12 dpf	Nascent mesoderm	E7
CGCGGTAAGCAGATCG	Ectoderm	Replicate 2	EXMC	17 dpf	Mesenchyme	E7.5
CGCGGTATCGGTCTAA	Endoderm	Replicate 2	VE/YE	16 dpf	Def. endoderm	E7.5
CGCGTTTGTCTCTCGT	Mesoderm-1	Replicate 2	L-Gast1	16 dpf	Primitive Streak	E7.25
CGCGTTTGTTACGCGC	Mesoderm-1	Replicate 2	postE-EPI	16 dpf	Epiblast	E7.25
CGCGTTTTCGGCATCG	hPGCLC	Replicate 2	E-Gast	14 dpf	Rostral neurectoderm	E7.5
CGCTGGACACACGCTG	hPGCLC	Replicate 2	E-PGC	16 dpf	Epiblast	E7
CGCTTCAAGCTGCGAA	ExE-like	Replicate 2	L-AM2	16 dpf	ExE ectoderm	E7.5
CGCTTCATCTATGTGG	Mesoderm-2	Replicate 2	EXMC	12 dpf	Nascent mesoderm	E7.5
CGGACACGTGGAAAGA	ExE-like	Replicate 2	E-AM	12 dpf	ExE ectoderm	E7
CGGACGTTCTAACTCT	Mesoderm-2	Replicate 2	EXMC	12 dpf	Nascent mesoderm	E7
CGGACTGAGAATTGTG	Mesoderm-1	Replicate 2	L-Gast1	16 dpf	Epiblast	E7.5
CGGACTGAGCTACCGC	ExE-like	Replicate 2	TE and derivatives	16 dpf	ExE ectoderm	E7
CGGACTGAGGCCATAG	EPI-like	Replicate 2	postE-EPI	14 dpf	Primitive Streak	E7
CGGACTGCACCGAAAG	hPGCLC	Replicate 2	E-PGC	16 dpf	ExE endoderm	E7.5
CGGACTGGTGATGATA	Endoderm	Replicate 2	EXMC	12 dpf	Nascent mesoderm	E7.25
CGGAGCTAGCGTTTAC	hPGCLC	Replicate 2	E-PGC	16 dpf	Def. endoderm	E7.5
CGGAGCTGTCTAGCCG	EPI-like	Replicate 2	postL-EPI	16 dpf	Primitive Streak	E7
CGGAGTCAGCTGTTCA	ExE-like	Replicate 2	TE and derivatives	12 dpf	ExE endoderm	E7.25
CGGAGTCCAGGGATTG	hPGCLC	Replicate 2	E-AM	16 dpf	ExE ectoderm	E7
CGGAGTCCATCCGGGT	ExE-like	Replicate 2	TE and derivatives	12 dpf	ExE ectoderm	E7.5
CGGAGTCGTCCGTGAC	Ectoderm	Replicate 2	postL-EPI	17 dpf	Epiblast	E7
CGGCTAGAGCTATGCT	hPGCLC	Replicate 2	E-PGC	16 dpf	Epiblast	E7
CGGCTAGGTCGCGGTT	Mesoderm-2	Replicate 2	EXMC	12 dpf	Nascent mesoderm	E7
CGGGTCAAGTGGTAAT	Mesoderm-1	Replicate 2	E-Gast	16 dpf	Intermediate mesoderm	E7.5
CGGTTAAAGGCGTACA	Ectoderm	Replicate 2	postL-EPI	17 dpf	Def. endoderm	E7.5
CGTAGCGGTTAGAACA	EPI-like	Replicate 2	postE-EPI	14 dpf	Epiblast	E7
CGTAGGCGTCAGAATA	Mesoderm-1	Replicate 2	L-Gast1	16 dpf	Primitive Streak	E7.5
CGTAGGCGTTTGTGTG	EPI-like	Replicate 2	postE-EPI	16 dpf	Epiblast	E7
CGTCACTAGACACGAC	Ectoderm	Replicate 2	E-AM	12 dpf	Mesenchyme	E7.5
CGTCACTTCTGTCTCG	ExE-like	Replicate 2	L-AM2	16 dpf	ExE ectoderm	E7.25
CGTCAGGAGTACGTTC	Mesoderm-1	Replicate 2	L-Gast2	16 dpf	Intermediate mesoderm	E7.5
CGTCAGGAGTCGATAA	Mesoderm-2	Replicate 2	EXMC	12 dpf	Nascent mesoderm	E7
CGTCAGGGTGAGTGAC	Ectoderm	Replicate 2	postL-EPI	17 dpf	ExE ectoderm	E7
CGTCTACAGATATGCA	Mesoderm-2	Replicate 2	L-Gast2	16 dpf	Nascent mesoderm	E7
CGTGAGCAGACTTTCG	Mesoderm-1	Replicate 2	L-Gast1	16 dpf	Primitive Streak	E7
CGTGAGCCAACTTGAC	EPI-like	Replicate 2	postE-EPI	14 dpf	Epiblast	E7
CGTGAGCCATCTATGG	ExE-like	Replicate 2	L-AM2	16 dpf	ExE ectoderm	E7
CGTGAGCGTCGACTAT	EPI-like	Replicate 2	postE-EPI	14 dpf	Primitive Streak	E7.25
CGTGAGCTCCCACTTG	ExE-like	Replicate 2	TE and derivatives	12 dpf	ExE ectoderm	E7.25
CGTGTAACATTAGGCT	Endoderm	Replicate 2	VE/YE	16 dpf	Anterior Primitive Streak	E7
CGTGTCTAGCGATAGC	Mesoderm-2	Replicate 2	VE/YE	16 dpf	Primitive Streak	E7
CGTTAGAGTTAAGACA	Mesoderm-1	Replicate 2	L-Gast1	16 dpf	Primitive Streak	E7
CGTTAGATCTGTCTCG	ExE-like	Replicate 2	L-AM2	16 dpf	ExE ectoderm	E7.25
CGTTCTGAGAAACGAG	ExE-like	Replicate 2	TE and derivatives	12 dpf	ExE ectoderm	E7
CGTTGGGAGACACTAA	ExE-like	Replicate 2	TE and derivatives	16 dpf	ExE ectoderm	E7.25
CGTTGGGAGGCTAGGT	Mesoderm-1	Replicate 2	postE-EPI	16 dpf	ExE ectoderm	E7.25
CGTTGGGGTTACGCGC	Endoderm	Replicate 2	EXMC	16 dpf	Haematoendothelial progenitors	E7
CGTTGGGTCATGCAAC	ExE-like	Replicate 2	E-AM	12 dpf	ExE ectoderm	E7
CGTTGGGTCCTAAGTG	Mesoderm-1	Replicate 2	postL-EPI	16 dpf	Primitive Streak	E7
CTAACTTGTCACTTCC	hPGCLC	Replicate 2	E-PGC	16 dpf	Epiblast	E7
CTAAGACAGCTAGGCA	EPI-like	Replicate 2	postL-EPI	16 dpf	Epiblast	E7
CTAAGACGTCGACTAT	Mesoderm-2	Replicate 2	EXMC	12 dpf	Nascent mesoderm	E7
CTAATGGGTAATCGTC	ExE-like	Replicate 2	L-AM2	16 dpf	ExE endoderm	E7
CTACACCTCAGTTCGA	hPGCLC	Replicate 2	E-PGC	16 dpf	Epiblast	E6.5
CTACACCTCTGAGTGT	hPGCLC	Replicate 2	E-PGC	16 dpf	Epiblast	E6.5
CTACATTAGAGTTGGC	ExE-like	Replicate 2	TE and derivatives	14 dpf	ExE ectoderm	E7.5
CTACATTTCCGAAGAG	hPGCLC	Replicate 2	E-PGC	16 dpf	Epiblast	E6.5
CTACCCACACTTGGAT	Mesoderm-1	Replicate 2	postE-EPI	14 dpf	Primitive Streak	E7
CTACCCACAGGAACGT	Mesoderm-1	Replicate 2	L-Gast1	16 dpf	Primitive Streak	E7.25
CTACCCAGTCTTCTCG	Mesoderm-1	Replicate 2	L-Gast1	16 dpf	Nascent mesoderm	E7.25
CTAGCCTAGGAGTCTG	hPGCLC	Replicate 2	E-PGC	16 dpf	ExE endoderm	E7.5
CTAGCCTAGGATCGCA	ExE-like	Replicate 2	TE and derivatives	12 dpf	ExE ectoderm	E7.25
CTAGCCTGTCGAGTTT	ExE-like	Replicate 2	TE and derivatives	16 dpf	ExE endoderm	E7
CTAGTGACATGCTGGC	Mesoderm-2	Replicate 2	EXMC	12 dpf	Nascent mesoderm	E7.25
CTCAGAAGTACTCGCG	Endoderm	Replicate 2	E-Gast	16 dpf	Anterior Primitive Streak	E7
CTCAGAAGTCATATGC	ExE-like	Replicate 2	L-AM2	16 dpf	ExE endoderm	E7.25
CTCAGAATCCTCATTA	Ectoderm	Replicate 2	postL-EPI	17 dpf	Mesenchyme	E7.5
CTCATTATCGGAGCAA	Mesoderm-1	Replicate 2	E-Gast	16 dpf	Intermediate mesoderm	E7.5
CTCGAGGGTTACTGAC	ExE-like	Replicate 2	TE and derivatives	12 dpf	ExE ectoderm	E7.5
CTCGGAGCACAAGACG	Mesoderm-1	Replicate 2	postE-EPI	14 dpf	Epiblast	E7.25
CTCGGAGGTGGCAAAC	ExE-like	Replicate 2	L-AM2	16 dpf	ExE endoderm	E7
CTCGGAGGTTAGTGGG	ExE-like	Replicate 2	TE and derivatives	16 dpf	ExE ectoderm	E7.5
CTCGGAGTCCGGGTGT	Mesoderm-2	Replicate 2	L-Gast2	16 dpf	Nascent mesoderm	E7.25
CTCGGAGTCGTCACGG	EPI-like	Replicate 2	postL-EPI	16 dpf	Epiblast	E7
CTCGGGACAGCGTCCA	EPI-like	Replicate 2	postE-EPI	14 dpf	Epiblast	E6.5
CTCGGGACATTCCTGC	hPGCLC	Replicate 2	E-PGC	16 dpf	ExE ectoderm	E7.25
CTCGGGAGTCTTCTCG	hPGCLC	Replicate 2	E-Gast	12 dpf	Epiblast	E6.5
CTCGGGATCGAATCCA	hPGCLC	Replicate 2	E-PGC	16 dpf	Epiblast	E7.25
CTCGTACAGGCCCGTT	ExE-like	Replicate 2	TE and derivatives	16 dpf	ExE ectoderm	E7.5
CTCGTACCATGCAATC	EPI-like	Replicate 2	postE-EPI	16 dpf	Epiblast	E7.25
CTCGTCATCAGGCCCA	hPGCLC	Replicate 2	E-PGC	16 dpf	Epiblast	E6.5
CTCTAATCACTCTGTC	Ectoderm	Replicate 2	EXMC	17 dpf	Mesenchyme	E7.5
CTGAAGTAGTGGTAAT	Endoderm	Replicate 2	VE/YE	16 dpf	Def. endoderm	E7.25
CTGAAGTGTCCCTACT	EPI-like	Replicate 2	postE-EPI	14 dpf	Primitive Streak	E7.25
CTGATAGGTAGGCATG	ExE-like	Replicate 2	TE and derivatives	12 dpf	ExE ectoderm	E7
CTGCCTAAGCTGAAAT	hPGCLC	Replicate 2	E-AM	12 dpf	ExE endoderm	E7
CTGCCTACACGGCGTT	Mesoderm-2	Replicate 2	EXMC	12 dpf	Mixed mesoderm	E7.25
CTGCCTAGTACCGTTA	Mesoderm-1	Replicate 2	L-Gast1	16 dpf	Primitive Streak	E7
CTGCTGTCAAGAAAGG	EPI-like	Replicate 2	postE-EPI	14 dpf	Epiblast	E6.5
CTGCTGTGTAGCGTGA	Mesoderm-2	Replicate 2	L-Gast2	16 dpf	Nascent mesoderm	E7
CTGCTGTGTTCTGAAC	hPGCLC	Replicate 2	E-Gast	12 dpf	Epiblast	E7.25
CTGTTTAGTAGTACCT	hPGCLC	Replicate 2	E-PGC	16 dpf	Epiblast	E6.5
CTTAACTCAGTCAGAG	hPGCLC	Replicate 2	E-PGC	16 dpf	Epiblast	E7
CTTAACTTCTGCGTAA	ExE-like	Replicate 2	L-AM2	16 dpf	ExE ectoderm	E7.5
CTTACCGCAAGTCTGT	EPI-like	Replicate 2	postE-EPI	14 dpf	Epiblast	E7
CTTACCGTCTAACGGT	hPGCLC	Replicate 2	E-PGC	16 dpf	Parietal endoderm	E7.25
CTTAGGAAGCAGCGTA	Mesoderm-2	Replicate 2	EXMC	12 dpf	Nascent mesoderm	E7.5
CTTAGGAAGTGAATTG	ExE-like	Replicate 2	TE and derivatives	14 dpf	ExE ectoderm	E7
CTTAGGACAGTAGAGC	Mesoderm-2	Replicate 2	EXMC	12 dpf	Nascent mesoderm	E7
CTTAGGATCAGGCCCA	ExE-like	Replicate 2	TE and derivatives	12 dpf	ExE ectoderm	E7.5
CTTAGGATCCTCGCAT	ExE-like	Replicate 2	L-AM2	16 dpf	ExE endoderm	E7
CTTCTCTCAAGCTGGA	hPGCLC	Replicate 2	E-PGC	16 dpf	Epiblast	E7
CTTCTCTCACTGTGTA	Mesoderm-1	Replicate 2	L-Gast1	16 dpf	Primitive Streak	E7.5
CTTCTCTGTAGCGTGA	ExE-like	Replicate 2	L-AM2	16 dpf	ExE endoderm	E7
CTTTGCGTCTGTTGAG	Mesoderm-2	Replicate 2	L-Gast2	16 dpf	Nascent mesoderm	E7.5
GAAATGACAGATGGGT	Mesoderm-1	Replicate 2	L-Gast1	16 dpf	Nascent mesoderm	E7.25
GAAATGACATCTATGG	Mesoderm-2	Replicate 2	EXMC	11 dpf	Nascent mesoderm	E7.25
GAAATGATCAACGAAA	EPI-like	Replicate 2	postE-EPI	14 dpf	Epiblast	E7
GAACATCTCTAACCGA	Endoderm	Replicate 2	E-PGC	16 dpf	Anterior Primitive Streak	E7.5
GAACCTATCTGGCGTG	EPI-like	Replicate 2	postE-EPI	14 dpf	Epiblast	E7.5
GAACCTATCTGGTATG	Endoderm	Replicate 2	E-PGC	16 dpf	Epiblast	E6.5
GAACGGATCCAGGGCT	Mesoderm-1	Replicate 2	E-Gast	14 dpf	Epiblast	E6.5
GAAGCAGAGTAGGCCA	Mesoderm-2	Replicate 2	VE/YE	16 dpf	Nascent mesoderm	E7
GAAGCAGTCCGTTGTC	ExE-like	Replicate 2	TE and derivatives	12 dpf	ExE ectoderm	E7.5
GAAGCAGTCTTGTCAT	hPGCLC	Replicate 2	E-Gast	14 dpf	Epiblast	E6.5
GAATAAGAGTAGCCGA	Mesoderm-2	Replicate 2	L-Gast2	16 dpf	Primitive Streak	E7
GAATAAGCAGTTCATG	ExE-like	Replicate 2	E-AM	12 dpf	ExE ectoderm	E6.5
GAATAAGGTACCGAGA	Mesoderm-2	Replicate 2	L-Gast2	16 dpf	Anterior Primitive Streak	E7.25
GAATAAGGTCCCTACT	Mesoderm-2	Replicate 2	VE/YE	16 dpf	Nascent mesoderm	E7
GAATAAGTCGTTACAG	ExE-like	Replicate 2	L-AM2	16 dpf	Mesenchyme	E7.5
GACACGCAGTTATCGC	EPI-like	Replicate 2	postE-EPI	14 dpf	Epiblast	E7
GACACGCGTGACCAAG	Mesoderm-2	Replicate 2	EXMC	12 dpf	Nascent mesoderm	E7.25
GACAGAGGTAACGCGA	ExE-like	Replicate 2	TE and derivatives	12 dpf	ExE endoderm	E7
GACAGAGTCTTACCGC	EPI-like	Replicate 2	postE-EPI	16 dpf	Epiblast	E7
GACCAATGTACCGGCT	ExE-like	Replicate 2	E-AM	12 dpf	ExE ectoderm	E7.5
GACCTGGAGTGTACCT	Mesoderm-2	Replicate 2	EXMC	12 dpf	Nascent mesoderm	E7.5
GACCTGGCAGAAGCAC	Mesoderm-1	Replicate 2	E-Gast	14 dpf	Primitive Streak	E7.25
GACGCGTGTAGCTAAA	ExE-like	Replicate 2	L-AM2	16 dpf	ExE ectoderm	E7.25
GACGGCTCATCCCACT	ExE-like	Replicate 2	E-AM	12 dpf	ExE ectoderm	E7.5
GACGGCTGTAGCCTAT	Mesoderm-2	Replicate 2	EXMC	12 dpf	Nascent mesoderm	E7.25
GACGTTAAGCCGGTAA	Mesoderm-1	Replicate 2	E-Gast	14 dpf	Primitive Streak	E7.25
GACTAACGTGTTAAGA	Mesoderm-1	Replicate 2	postE-EPI	14 dpf	Primitive Streak	E7.25
GACTAACTCGAACGGA	Mesoderm-2	Replicate 2	EXMC	12 dpf	Nascent mesoderm	E7.5
GACTACAAGCGTAATA	Mesoderm-2	Replicate 2	EXMC	12 dpf	Nascent mesoderm	E7
GACTACATCGCCAGCA	EPI-like	Replicate 2	postL-EPI	16 dpf	Epiblast	E7.25
GACTGCGAGATATGCA	EPI-like	Replicate 2	postL-EPI	16 dpf	Epiblast	E7
GACTGCGCAGTAAGAT	Endoderm	Replicate 2	E-Gast	16 dpf	Def. endoderm	E7.5
GAGCAGAAGAGGTACC	hPGCLC	Replicate 2	E-Gast	14 dpf	ExE ectoderm	E7.5
GAGCAGACAATCCGAT	Ectoderm	Replicate 2	EXMC	17 dpf	Mesenchyme	E7.5
GAGGTGATCCAAATGC	Mesoderm-2	Replicate 2	EXMC	12 dpf	Intermediate mesoderm	E7.5
GAGGTGATCGCTAGCG	Mesoderm-2	Replicate 2	EXMC	12 dpf	Nascent mesoderm	E7.25
GAGTCCGCAAGGGTCA	Endoderm	Replicate 2	E-Gast	16 dpf	Primitive Streak	E7.25
GATCAGTGTTCAGTAC	hPGCLC	Replicate 2	E-PGC	16 dpf	Epiblast	E6.5
GATCAGTTCTCCTATA	Mesoderm-2	Replicate 2	VE/YE	16 dpf	Anterior Primitive Streak	E7
GATCGATGTCGCGGTT	EPI-like	Replicate 2	postL-EPI	16 dpf	Epiblast	E7.5
GATCGATGTTGGTGGA	ExE-like	Replicate 2	L-AM2	16 dpf	ExE ectoderm	E7.25
GATCGATTCCAGAAGG	EPI-like	Replicate 2	postE-EPI	16 dpf	Epiblast	E6.5
GATCGCGAGCTTTGGT	hPGCLC	Replicate 2	EXMC	16 dpf	Epiblast	E7
GATCGCGGTCCCGACA	Endoderm	Replicate 2	VE/YE	16 dpf	Nascent mesoderm	E7
GATCGCGTCATGCTCC	EPI-like	Replicate 2	postE-EPI	16 dpf	Epiblast	E7
GATCGCGTCTCGTTTA	hPGCLC	Replicate 2	E-Gast	12 dpf	Epiblast	E7
GATCGTAAGGCCATAG	Mesoderm-1	Replicate 2	E-Gast	14 dpf	Primitive Streak	E7.25
GATCGTACACTCTGTC	Endoderm	Replicate 2	L-Gast1	16 dpf	Anterior Primitive Streak	E7
GATCTAGTCTCACATT	ExE-like	Replicate 2	TE and derivatives	16 dpf	ExE ectoderm	E7.5
GATGAAAAGGCCCGTT	hPGCLC	Replicate 2	E-PGC	16 dpf	Epiblast	E7.25
GATGAAACAGATCCAT	Mesoderm-2	Replicate 2	L-Gast1	16 dpf	Nascent mesoderm	E7
GATGAGGCACCAGTTA	hPGCLC	Replicate 2	E-PGC	16 dpf	Epiblast	E7.25
GATGAGGTCTTGAGAC	Mesoderm-2	Replicate 2	VE/YE	16 dpf	Anterior Primitive Streak	E7
GATGCTAAGATAGTCA	Mesoderm-1	Replicate 2	E-Gast	16 dpf	Intermediate mesoderm	E7.5
GATTCAGCATGGTTGT	Mesoderm-2	Replicate 2	L-Gast2	12 dpf	Primitive Streak	E7.25
GCAAACTAGACAATAC	EPI-like	Replicate 2	postE-EPI	14 dpf	Epiblast	E7
GCAAACTGTAGATTAG	hPGCLC	Replicate 2	E-PGC	16 dpf	Surface ectoderm	E7.5
GCACATAGTGACTACT	EPI-like	Replicate 2	postL-EPI	16 dpf	Epiblast	E7
GCACATAGTGTGGCTC	Mesoderm-1	Replicate 2	E-Gast	16 dpf	Epiblast	E7.25
GCACTCTAGGACCACA	Endoderm	Replicate 2	L-Gast1	16 dpf	Epiblast	E6.5
GCAGCCAGTCGCGTGT	Endoderm	Replicate 2	EXMC	16 dpf	Primitive Streak	E7
GCAGTTACACCGAATT	ExE-like	Replicate 2	TE and derivatives	14 dpf	ExE ectoderm	E7.25
GCATACAAGAGTCGGT	hPGCLC	Replicate 2	EXMC	17 dpf	Mixed mesoderm	E7.5
GCATACATCGCAAGCC	Mesoderm-2	Replicate 2	EXMC	12 dpf	Nascent mesoderm	E7.25
GCATGATCAATGTAAG	Mesoderm-2	Replicate 2	EXMC	12 dpf	Nascent mesoderm	E7.5
GCATGATTCGACCAGC	Endoderm	Replicate 2	EXMC	16 dpf	ExE endoderm	E7
GCATGCGCACTAAGTC	Mesoderm-1	Replicate 2	postE-EPI	14 dpf	Primitive Streak	E7
GCATGTAAGAAGGGTA	hPGCLC	Replicate 2	E-PGC	16 dpf	ExE ectoderm	E7
GCCTCTAGTCCGACGT	Mesoderm-2	Replicate 2	L-Gast2	16 dpf	Anterior Primitive Streak	E7
GCGAGAAGTAAGGGCT	Ectoderm	Replicate 2	postL-EPI	17 dpf	Rostral neurectoderm	E7.5
GCGAGAAGTTCCAACA	hPGCLC	Replicate 2	E-PGC	16 dpf	ExE ectoderm	E7.25
GCGCAACCATATACGC	Mesoderm-1	Replicate 2	E-Gast	14 dpf	Rostral neurectoderm	E7.5
GCGCAACCATCCCATC	hPGCLC	Replicate 2	E-PGC	16 dpf	Epiblast	E7.25
GCGCCAATCCCTCTTT	hPGCLC	Replicate 2	E-AM	12 dpf	ExE endoderm	E7.5
GCGCGATAGTTCCACA	Mesoderm-2	Replicate 2	L-Gast2	16 dpf	Nascent mesoderm	E7
GCGCGATGTCCAAGTT	Mesoderm-1	Replicate 2	L-Gast1	16 dpf	Primitive Streak	E7
GCGCGATTCAGCTGGC	hPGCLC	Replicate 2	E-PGC	16 dpf	Epiblast	E7.25
GCGGGTTGTGTTTGGT	hPGCLC	Replicate 2	E-PGC	16 dpf	Epiblast	E7
GCTCTGTAGAATGTTG	ExE-like	Replicate 2	TE and derivatives	16 dpf	ExE ectoderm	E7
GCTGCGAGTTTGGGCC	Mesoderm-1	Replicate 2	L-Gast1	16 dpf	Nascent mesoderm	E7.5
GCTGCTTAGTCCATAC	ExE-like	Replicate 2	TE and derivatives	12 dpf	ExE ectoderm	E7.5
GCTGCTTGTAGCACGA	ExE-like	Replicate 2	L-AM2	16 dpf	Mesenchyme	E7.5
GCTGCTTTCATGCAAC	Mesoderm-2	Replicate 2	EXMC	16 dpf	Nascent mesoderm	E7.25
GCTTCCATCTCCAACC	Ectoderm	Replicate 2	EXMC	17 dpf	ExE ectoderm	E7
GCTTGAAAGAGGACGG	ExE-like	Replicate 2	L-AM2	16 dpf	ExE endoderm	E7
GCTTGAAGTCGCATAT	EPI-like	Replicate 2	postE-EPI	14 dpf	Epiblast	E7.5
GGAAAGCGTGGCTCCA	Mesoderm-1	Replicate 2	L-Gast1	14 dpf	Primitive Streak	E7.5
GGAACTTAGACAGACC	Mesoderm-2	Replicate 2	VE/YE	16 dpf	Nascent mesoderm	E7
GGAACTTCAAAGGAAG	Mesoderm-2	Replicate 2	EXMC	16 dpf	Nascent mesoderm	E7.5
GGAACTTTCTTAGCCC	hPGCLC	Replicate 2	E-PGC	16 dpf	ExE endoderm	E7.25
GGAATAACACGACGAA	ExE-like	Replicate 2	TE and derivatives	12 dpf	ExE ectoderm	E7.5
GGAATAATCCGTAGTA	hPGCLC	Replicate 2	E-Gast	16 dpf	Epiblast	E7.5
GGAATAATCGGCGCAT	ExE-like	Replicate 2	TE and derivatives	12 dpf	ExE ectoderm	E7.5
GGACAAGCATTCCTCG	Mesoderm-2	Replicate 2	EXMC	12 dpf	Nascent mesoderm	E7
GGACAGAGTCCAACTA	hPGCLC	Replicate 2	EXMC	14 dpf	Primitive Streak	E7.5
GGACATTCAGGAATCG	ExE-like	Replicate 2	TE and derivatives	14 dpf	ExE ectoderm	E7.25
GGAGCAAAGATCTGAA	EPI-like	Replicate 2	postL-EPI	16 dpf	Epiblast	E7
GGAGCAACAGGGAGAG	hPGCLC	Replicate 2	E-PGC	16 dpf	Epiblast	E6.5
GGATGTTAGCCACCTG	hPGCLC	Replicate 2	E-PGC	16 dpf	ExE ectoderm	E7.25
GGATGTTAGTACGACG	Ectoderm	Replicate 2	postL-EPI	17 dpf	Epiblast	E6.5
GGATGTTTCCAGATCA	ExE-like	Replicate 2	TE and derivatives	12 dpf	ExE endoderm	E7.25
GGATGTTTCCGTTGTC	Mesoderm-2	Replicate 2	L-Gast2	16 dpf	Nascent mesoderm	E7.25
GGCCGATCAAATCCGT	Mesoderm-1	Replicate 2	postE-EPI	14 dpf	Primitive Streak	E7
GGCGACTAGACAGGCT	Mesoderm-2	Replicate 2	L-Gast1	16 dpf	Def. endoderm	E7.5
GGCGACTCACCAGCAC	hPGCLC	Replicate 2	E-PGC	16 dpf	Epiblast	E7.25
GGCGACTCACCATCCT	EPI-like	Replicate 2	postE-EPI	14 dpf	Epiblast	E7
GGCGACTTCACTCCTG	hPGCLC	Replicate 2	E-PGC	16 dpf	Epiblast	E7
GGCGTGTCAGATGAGC	Mesoderm-1	Replicate 2	postE-EPI	12 dpf	Primitive Streak	E7
GGCTCGAAGCTTTGGT	ExE-like	Replicate 2	L-AM2	16 dpf	ExE ectoderm	E7.5
GGCTCGATCCACGCAG	Endoderm	Replicate 2	VE/YE	16 dpf	Mixed mesoderm	E7.25
GGCTGGTGTTCTCATT	EPI-like	Replicate 2	postL-EPI	16 dpf	Primitive Streak	E7
GGCTGGTTCAAGATCC	Mesoderm-2	Replicate 2	VE/YE	16 dpf	Anterior Primitive Streak	E7.25
GGGAATGGTTCATGGT	hPGCLC	Replicate 2	E-PGC	16 dpf	Epiblast	E6.5
GGGAATGTCGTGACAT	ExE-like	Replicate 2	L-AM2	16 dpf	ExE endoderm	E7
GGGACCTGTTCGTGAT	hPGCLC	Replicate 2	E-PGC	16 dpf	Epiblast	E7.5
GGGACCTTCAGCGATT	hPGCLC	Replicate 2	E-PGC	16 dpf	ExE endoderm	E7.5
GGGACCTTCATCACCC	ExE-like	Replicate 2	E-AM	12 dpf	ExE ectoderm	E6.5
GGGACCTTCCACTCCA	hPGCLC	Replicate 2	E-PGC	16 dpf	Epiblast	E7
GGGAGATCAAGTCTGT	EPI-like	Replicate 2	postE-EPI	16 dpf	Epiblast	E7
GGGATGAGTGCACCAC	Mesoderm-1	Replicate 2	L-Gast1	16 dpf	Nascent mesoderm	E7.25
GGGCATCAGTGCGATG	Mesoderm-2	Replicate 2	L-Gast2	16 dpf	Nascent mesoderm	E7
GGGCATCCAGTTCATG	Mesoderm-2	Replicate 2	EXMC	12 dpf	Nascent mesoderm	E7.25
GGGTCTGAGCGTAATA	ExE-like	Replicate 2	TE and derivatives	12 dpf	ExE ectoderm	E7
GGGTCTGCAGTCTTCC	hPGCLC	Replicate 2	E-PGC	16 dpf	ExE ectoderm	E7
GGTATTGTCTGGTATG	ExE-like	Replicate 2	TE and derivatives	12 dpf	ExE endoderm	E7
GGTGAAGTCAAGATCC	hPGCLC	Replicate 2	E-AM	12 dpf	ExE ectoderm	E7
GGTGAAGTCGCAAGCC	hPGCLC	Replicate 2	EXMC	16 dpf	Epiblast	E7
GGTGAAGTCTTTCCTC	hPGCLC	Replicate 2	E-PGC	16 dpf	ExE endoderm	E7.5
GTAACGTAGGTGATTA	Mesoderm-2	Replicate 2	EXMC	12 dpf	Nascent mesoderm	E7.25
GTAACGTCAAGTCTGT	hPGCLC	Replicate 2	E-PGC	16 dpf	Epiblast	E7.25
GTAACTGGTGAAATCA	hPGCLC	Replicate 2	E-PGC	16 dpf	Epiblast	E7
GTACTTTGTTGGTAAA	ExE-like	Replicate 2	E-AM	12 dpf	ExE endoderm	E7
GTAGGCCAGACAAGCC	ExE-like	Replicate 2	TE and derivatives	12 dpf	ExE ectoderm	E7.5
GTAGGCCAGCGTAATA	EPI-like	Replicate 2	postL-EPI	16 dpf	Epiblast	E7.25
GTAGGCCAGTTGAGAT	Mesoderm-2	Replicate 2	VE/YE	16 dpf	Nascent mesoderm	E7
GTAGTCAGTCCTCCAT	hPGCLC	Replicate 2	E-PGC	16 dpf	Epiblast	E6.5
GTAGTCAGTCGCGTGT	ExE-like	Replicate 2	TE and derivatives	12 dpf	ExE ectoderm	E7.5
GTAGTCATCACGGTTA	ExE-like	Replicate 2	TE and derivatives	16 dpf	ExE ectoderm	E7.5
GTATCTTAGATCCCGC	ExE-like	Replicate 2	E-AM	12 dpf	ExE endoderm	E7.25
GTATCTTAGTAGGTGC	Ectoderm	Replicate 2	EXMC	17 dpf	Mixed mesoderm	E7.5
GTATCTTGTCAACTGT	Ectoderm	Replicate 2	EXMC	17 dpf	ExE endoderm	E7.5
GTATTCTCAAGCCGCT	Mesoderm-1	Replicate 2	postE-EPI	14 dpf	Epiblast	E7
GTATTCTCATAAGACA	hPGCLC	Replicate 2	E-PGC	16 dpf	Epiblast	E6.5
GTATTCTCATGTTGAC	Mesoderm-1	Replicate 2	L-Gast2	16 dpf	Nascent mesoderm	E7
GTCAAGTTCTTAACCT	hPGCLC	Replicate 2	E-PGC	16 dpf	Visceral endoderm	E7.5
GTCACGGAGGATGGAA	hPGCLC	Replicate 2	E-AM	16 dpf	Epiblast	E6.5
GTCACGGTCTTTCCTC	hPGCLC	Replicate 2	E-PGC	16 dpf	Epiblast	E6.5
GTCATTTAGAAACCGC	EPI-like	Replicate 2	postL-EPI	16 dpf	Epiblast	E7
GTCATTTCAGATGGCA	Mesoderm-1	Replicate 2	postE-EPI	16 dpf	Primitive Streak	E7.25
GTCATTTTCCAAACAC	Ectoderm	Replicate 2	EXMC	17 dpf	ExE mesoderm	E7.5
GTCCTCATCGGACAAG	hPGCLC	Replicate 2	E-PGC	16 dpf	Primitive Streak	E7
GTCCTCATCTGCGGCA	Mesoderm-1	Replicate 2	postL-EPI	16 dpf	Def. endoderm	E7.5
GTCGGGTCAGGTCTCG	Mesoderm-2	Replicate 2	EXMC	11 dpf	Mixed mesoderm	E7.25
GTCTCGTCATCGGAAG	ExE-like	Replicate 2	TE and derivatives	16 dpf	ExE endoderm	E7.25
GTCTCGTTCGCAAACT	Mesoderm-2	Replicate 2	VE/YE	16 dpf	Nascent mesoderm	E7
GTCTTCGAGCCACTAT	Ectoderm	Replicate 2	postL-EPI	17 dpf	Anterior Primitive Streak	E7.5
GTGAAGGCAATGAAAC	hPGCLC	Replicate 2	E-AM	16 dpf	Epiblast	E6.5
GTGAAGGCAATGGTCT	Mesoderm-1	Replicate 2	L-Gast1	16 dpf	Primitive Streak	E7
GTGAAGGGTGCACTTA	Mesoderm-2	Replicate 2	L-Gast2	16 dpf	Anterior Primitive Streak	E7
GTGCAGCCACGTTGGC	Ectoderm	Replicate 2	postL-EPI	17 dpf	Primitive Streak	E7
GTGCATAAGTTGAGAT	ExE-like	Replicate 2	TE and derivatives	14 dpf	ExE ectoderm	E7.5
GTGCATATCCATTCTA	ExE-like	Replicate 2	E-AM	12 dpf	ExE ectoderm	E7.5
GTGCTTCCAGACTCGC	Mesoderm-1	Replicate 2	L-Gast1	16 dpf	Nascent mesoderm	E7
GTGCTTCGTATTACCG	Endoderm	Replicate 2	L-Gast2	16 dpf	Nascent mesoderm	E7.25
GTGCTTCGTGTGTGCC	Ectoderm	Replicate 2	EXMC	17 dpf	Mesenchyme	E7.5
GTGTGCGAGCCGGTAA	Mesoderm-2	Replicate 2	E-Gast	14 dpf	Intermediate mesoderm	E7.5
GTGTGCGCACTTAAGC	Endoderm	Replicate 2	VE/YE	16 dpf	Anterior Primitive Streak	E7
GTGTGCGCATCTCCCA	EPI-like	Replicate 2	postE-EPI	14 dpf	Primitive Streak	E7.25
GTGTTAGAGTGTACGG	hPGCLC	Replicate 2	E-PGC	16 dpf	ExE endoderm	E7.5
GTGTTAGCAATGGACG	Mesoderm-2	Replicate 2	EXMC	12 dpf	Nascent mesoderm	E7.25
GTGTTAGGTTTGGGCC	Mesoderm-1	Replicate 2	L-Gast1	16 dpf	Primitive Streak	E6.75
GTGTTAGTCCTCAATT	EPI-like	Replicate 2	postE-EPI	16 dpf	Epiblast	E7.5
GTTACAGCATGAAGTA	hPGCLC	Replicate 2	E-PGC	16 dpf	Rostral neurectoderm	E7.5
GTTACAGGTTTCGCTC	ExE-like	Replicate 2	TE and derivatives	12 dpf	ExE ectoderm	E7
GTTACAGTCTAACGGT	Mesoderm-2	Replicate 2	L-Gast2	16 dpf	Nascent mesoderm	E7
GTTCATTAGGCTACGA	EPI-like	Replicate 2	postE-EPI	14 dpf	Epiblast	E7
GTTCGGGGTAGCGTGA	ExE-like	Replicate 2	TE and derivatives	14 dpf	ExE ectoderm	E7.5
GTTCGGGTCATTGCGA	ExE-like	Replicate 2	TE and derivatives	12 dpf	ExE ectoderm	E7
GTTCTCGAGGTGCAAC	Mesoderm-2	Replicate 2	EXMC	12 dpf	Nascent mesoderm	E7
GTTTCTATCCTTTCTC	Endoderm	Replicate 2	VE/YE	16 dpf	Anterior Primitive Streak	E7
TAAACCGCAAGTCTGT	Mesoderm-1	Replicate 2	postE-EPI	16 dpf	Anterior Primitive Streak	E7
TAAACCGGTCTCCACT	Mesoderm-1	Replicate 2	postE-EPI	14 dpf	Primitive Streak	E7.25
TAAACCGTCCTGCAGG	Mesoderm-1	Replicate 2	L-Gast1	16 dpf	Primitive Streak	E7
TAAACCGTCGAGCCCA	ExE-like	Replicate 2	L-AM2	16 dpf	ExE ectoderm	E6.5
TAAGAGAGTCGCTTCT	EPI-like	Replicate 2	postE-EPI	14 dpf	Primitive Streak	E7
TAAGCGTCACAAGTAA	Mesoderm-2	Replicate 2	EXMC	16 dpf	Nascent mesoderm	E7
TAAGCGTGTCTGATTG	Ectoderm	Replicate 2	EXMC	17 dpf	Mesenchyme	E7.5
TAAGTGCTCGGGAGTA	Mesoderm-1	Replicate 2	L-Gast1	16 dpf	Primitive Streak	E7
TACAGTGGTTCATGGT	Endoderm	Replicate 2	L-Gast1	16 dpf	Def. endoderm	E7.25
TACCTATAGGATGGAA	Endoderm	Replicate 2	E-Gast	14 dpf	Epiblast	E7.25
TACCTATGTCTCTCTG	hPGCLC	Replicate 2	E-Gast	16 dpf	ExE ectoderm	E7
TACCTTAAGAATTGTG	Ectoderm	Replicate 2	EXMC	17 dpf	Mesenchyme	E7.5
TACCTTAAGGCTCATT	hPGCLC	Replicate 2	E-PGC	16 dpf	Blood progenitors 2	E7.5
TACCTTACAGGCAGTA	Endoderm	Replicate 2	E-PGC	16 dpf	ExE endoderm	E7.5
TACCTTATCTGGAGCC	hPGCLC	Replicate 2	E-PGC	16 dpf	Epiblast	E7
TACGGATAGTGTTAGA	ExE-like	Replicate 2	TE and derivatives	12 dpf	ExE ectoderm	E7
TACGGATTCCACTCCA	Ectoderm	Replicate 2	postL-EPI	17 dpf	Rostral neurectoderm	E7.5
TACGGATTCTCGCTTG	Mesoderm-2	Replicate 2	EXMC	12 dpf	Nascent mesoderm	E7.25
TACGGGCAGATCCGAG	Mesoderm-1	Replicate 2	L-Gast1	16 dpf	Nascent mesoderm	E7
TACGGTACACAACGTT	Ectoderm	Replicate 2	postL-EPI	17 dpf	Rostral neurectoderm	E7.5
TACGGTACACTGAAGG	Mesoderm-1	Replicate 2	L-Gast1	16 dpf	Caudal epiblast	E7.5
TACGGTACATGCTGGC	Mesoderm-2	Replicate 2	EXMC	12 dpf	Nascent mesoderm	E7.5
TACGGTAGTGACAAAT	Mesoderm-2	Replicate 2	L-Gast1	16 dpf	Nascent mesoderm	E7
TACTCATCACGACGAA	Mesoderm-2	Replicate 2	EXMC	12 dpf	Nascent mesoderm	E7.25
TACTCATCATTCGACA	EPI-like	Replicate 2	postE-EPI	16 dpf	Epiblast	E7
TACTCGCCATGGTCAT	Ectoderm	Replicate 2	EXMC	17 dpf	Mesenchyme	E7.5
TACTCGCGTCAAAGAT	hPGCLC	Replicate 2	E-PGC	16 dpf	Epiblast	E7.25
TACTTACGTGCAACGA	ExE-like	Replicate 2	TE and derivatives	13 dpf	ExE ectoderm	E6.5
TACTTGTGTCCGACGT	ExE-like	Replicate 2	E-AM	12 dpf	ExE ectoderm	E7.5
TAGACCACAAGTACCT	Mesoderm-2	Replicate 2	EXMC	12 dpf	Nascent mesoderm	E7
TAGAGCTAGATACACA	ExE-like	Replicate 2	TE and derivatives	12 dpf	ExE ectoderm	E7.25
TAGAGCTCACAGAGGT	Ectoderm	Replicate 2	EXMC	17 dpf	Def. endoderm	E7.25
TAGCCGGGTATATCCG	Mesoderm-2	Replicate 2	EXMC	12 dpf	Nascent mesoderm	E7
TAGGCATAGTAACCCT	Mesoderm-2	Replicate 2	EXMC	16 dpf	Nascent mesoderm	E7.25
TAGGCATCACCGGAAA	Mesoderm-2	Replicate 2	EXMC	12 dpf	Nascent mesoderm	E7
TAGTGGTAGAGGTTGC	hPGCLC	Replicate 2	E-Gast	14 dpf	Epiblast	E7.5
TAGTGGTCAGCTGTAT	EPI-like	Replicate 2	postE-EPI	16 dpf	Epiblast	E7
TATCAGGAGGATTCGG	hPGCLC	Replicate 2	E-Gast	14 dpf	Rostral neurectoderm	E7.5
TATCAGGCACCAGGTC	hPGCLC	Replicate 2	E-PGC	16 dpf	ExE endoderm	E7.5
TATCTCAAGTTCCACA	ExE-like	Replicate 2	TE and derivatives	12 dpf	ExE ectoderm	E6.5
TATTACCAGGGTTCCC	ExE-like	Replicate 2	L-AM2	16 dpf	Surface ectoderm	E7.5
TATTACCGTCGTTGTA	hPGCLC	Replicate 2	E-PGC	16 dpf	Epiblast	E6.5
TCAACGACATTGAGCT	ExE-like	Replicate 2	L-AM2	16 dpf	ExE ectoderm	E7.5
TCAATCTGTTCAGCGC	EPI-like	Replicate 2	postL-EPI	16 dpf	Epiblast	E7
TCACAAGTCGTAGATC	hPGCLC	Replicate 2	E-PGC	16 dpf	Epiblast	E7
TCACGAACAGAGTGTG	Mesoderm-2	Replicate 2	EXMC	12 dpf	Mixed mesoderm	E7.25
TCACGAACATTTGCTT	Endoderm	Replicate 2	VE/YE	12 dpf	Anterior Primitive Streak	E7
TCAGATGGTGAGTATA	Endoderm	Replicate 2	E-Gast	16 dpf	Def. endoderm	E7.25
TCAGCAAGTCTCACCT	Mesoderm-1	Replicate 2	L-Gast1	16 dpf	Primitive Streak	E7
TCAGCAAGTGGTGTAG	ExE-like	Replicate 2	TE and derivatives	12 dpf	ExE ectoderm	E7.25
TCAGCTCAGGCGACAT	hPGCLC	Replicate 2	E-PGC	16 dpf	ExE endoderm	E7
TCAGCTCGTACCGCTG	ExE-like	Replicate 2	E-AM	12 dpf	ExE ectoderm	E7.5
TCAGGATCACAGCCCA	ExE-like	Replicate 2	L-AM2	16 dpf	ExE endoderm	E7
TCAGGATCATACGCCG	hPGCLC	Replicate 2	E-PGC	16 dpf	Epiblast	E7.25
TCAGGATTCATTGCGA	ExE-like	Replicate 2	E-AM	12 dpf	ExE ectoderm	E7
TCAGGTAGTCGAGTTT	Ectoderm	Replicate 2	EXMC	17 dpf	Mesenchyme	E7.5
TCATTACAGACGCACA	EPI-like	Replicate 2	postE-EPI	14 dpf	Epiblast	E7
TCATTACGTATGAATG	Ectoderm	Replicate 2	EXMC	17 dpf	ExE mesoderm	E7.5
TCATTACGTCGACTAT	hPGCLC	Replicate 2	E-PGC	16 dpf	ExE ectoderm	E7.5
TCATTACGTTCCGGCA	ExE-like	Replicate 2	postE-EPI	14 dpf	ExE ectoderm	E7.5
TCATTTGAGCGTTGCC	hPGCLC	Replicate 2	E-PGC	16 dpf	ExE ectoderm	E7.25
TCATTTGTCGCAGGCT	hPGCLC	Replicate 2	E-Gast	12 dpf	Epiblast	E6.5
TCATTTGTCGTACGGC	Mesoderm-2	Replicate 2	VE/YE	16 dpf	Nascent mesoderm	E7
TCCACACTCGAACTGT	hPGCLC	Replicate 2	E-PGC	16 dpf	ExE ectoderm	E7.5
TCCCGATTCCAAGCCG	Mesoderm-1	Replicate 2	postL-EPI	16 dpf	Epiblast	E7
TCGAGGCGTCAGATAA	ExE-like	Replicate 2	TE and derivatives	12 dpf	ExE ectoderm	E7.5
TCGAGGCTCAGTTGAC	Mesoderm-1	Replicate 2	postE-EPI	12 dpf	Epiblast	E6.5
TCGCGTTCATCAGTAC	EPI-like	Replicate 2	postL-EPI	16 dpf	Epiblast	E7.25
TCGCGTTGTCCAAGTT	Mesoderm-1	Replicate 2	postE-EPI	14 dpf	Epiblast	E6.5
TCGGGACAGGCCCTTG	ExE-like	Replicate 2	TE and derivatives	16 dpf	ExE ectoderm	E7.25
TCGGGACGTCAGAGGT	EPI-like	Replicate 2	postE-EPI	14 dpf	Epiblast	E6.5
TCGGTAACAAGCGCTC	EPI-like	Replicate 2	postE-EPI	14 dpf	Epiblast	E7
TCGGTAATCCCGACTT	Endoderm	Replicate 2	EXMC	16 dpf	Def. endoderm	E7.5
TCGTAGAAGATGGCGT	hPGCLC	Replicate 2	E-PGC	16 dpf	Epiblast	E7.25
TCGTAGAAGCCAGGAT	EPI-like	Replicate 2	postE-EPI	14 dpf	ExE ectoderm	E7
TCGTAGACACATTCGA	hPGCLC	Replicate 2	E-Gast	14 dpf	Epiblast	E6.5
TCGTAGACATGTAGTC	Mesoderm-2	Replicate 2	EXMC	12 dpf	Nascent mesoderm	E7
TCTATTGAGATAGCAT	hPGCLC	Replicate 2	E-PGC	16 dpf	Epiblast	E6.5
TCTATTGCACTGTTAG	Ectoderm	Replicate 2	postL-EPI	17 dpf	Rostral neurectoderm	E7.5
TCTCATAGTCTTGATG	hPGCLC	Replicate 2	E-PGC	16 dpf	ExE endoderm	E7.5
TCTCATATCCAAATGC	Ectoderm	Replicate 2	EXMC	17 dpf	Mesenchyme	E7.5
TCTCTAAAGCCAGTAG	Mesoderm-1	Replicate 2	L-Gast1	16 dpf	Caudal epiblast	E7.5
TCTCTAACAGGAATCG	hPGCLC	Replicate 2	E-PGC	16 dpf	ExE endoderm	E7.5
TCTCTAAGTCCGTGAC	ExE-like	Replicate 2	E-AM	12 dpf	ExE ectoderm	E7
TCTGAGAAGGATGGTC	Ectoderm	Replicate 2	EXMC	17 dpf	Mesenchyme	E7.5
TCTGAGATCAAAGTAG	Mesoderm-1	Replicate 2	L-Gast1	16 dpf	Caudal epiblast	E7.5
TCTGGAAGTAAGTAGT	ExE-like	Replicate 2	TE and derivatives	14 dpf	ExE ectoderm	E7.5
TCTGGAATCCAAGTAC	hPGCLC	Replicate 2	E-PGC	16 dpf	Epiblast	E6.5
TCTTCGGAGGAGTAGA	EPI-like	Replicate 2	postL-EPI	16 dpf	Epiblast	E7.25
TCTTCGGCAAATTGCC	Mesoderm-1	Replicate 2	E-Gast	14 dpf	Nascent mesoderm	E7.5
TCTTCGGGTCCGTTAA	Mesoderm-2	Replicate 2	EXMC	11 dpf	Mixed mesoderm	E7.25
TCTTCGGGTCGACTAT	Ectoderm	Replicate 2	postL-EPI	17 dpf	Rostral neurectoderm	E7.5
TCTTTCCCACGTGAGA	Mesoderm-2	Replicate 2	EXMC	12 dpf	Nascent mesoderm	E7
TGACAACCATTAGGCT	hPGCLC	Replicate 2	E-PGC	16 dpf	ExE ectoderm	E7.5
TGACAACGTAGCACGA	ExE-like	Replicate 2	L-AM2	16 dpf	ExE ectoderm	E7
TGACAACGTGTGACCC	Mesoderm-2	Replicate 2	VE/YE	16 dpf	Nascent mesoderm	E7
TGACGGCCAAAGTGCG	hPGCLC	Replicate 2	E-PGC	16 dpf	Primitive Streak	E7
TGACGGCCAGATGGGT	Endoderm	Replicate 2	VE/YE	14 dpf	Caudal epiblast	E7.5
TGACTAGCATGCCTTC	hPGCLC	Replicate 2	E-PGC	16 dpf	ExE ectoderm	E7
TGACTTTCACCAGGCT	Mesoderm-2	Replicate 2	L-Gast1	16 dpf	Nascent mesoderm	E7.25
TGACTTTGTCAAACTC	ExE-like	Replicate 2	L-AM2	16 dpf	ExE ectoderm	E7.5
TGAGAGGGTACCATCA	Mesoderm-1	Replicate 2	L-Gast1	16 dpf	Primitive Streak	E7
TGAGAGGTCCGCATCT	ExE-like	Replicate 2	TE and derivatives	12 dpf	ExE endoderm	E7
TGAGCATAGCTTATCG	hPGCLC	Replicate 2	E-PGC	16 dpf	Epiblast	E6.5
TGAGCATCAGTAGAGC	Mesoderm-2	Replicate 2	VE/YE	16 dpf	Nascent mesoderm	E7
TGAGCATTCTTGACGA	ExE-like	Replicate 2	L-AM2	16 dpf	Mesenchyme	E7.5
TGAGCCGAGAAAGTGG	hPGCLC	Replicate 2	E-PGC	16 dpf	Epiblast	E7.5
TGAGCCGAGACACTAA	Mesoderm-2	Replicate 2	L-Gast2	16 dpf	Nascent mesoderm	E7
TGAGCCGAGGACTGGT	Endoderm	Replicate 2	EXMC	16 dpf	Def. endoderm	E7.5
TGAGCCGTCACGATGT	hPGCLC	Replicate 2	E-PGC	16 dpf	Epiblast	E7
TGAGCCGTCTGCGTAA	ExE-like	Replicate 2	TE and derivatives	16 dpf	ExE ectoderm	E7.25
TGAGGGATCCATGAGT	Endoderm	Replicate 2	VE/YE	16 dpf	Anterior Primitive Streak	E7.25
TGATTTCCAATCGGTT	Mesoderm-1	Replicate 2	E-Gast	14 dpf	Nascent mesoderm	E7.5
TGCACCTTCCCATTTA	Mesoderm-2	Replicate 2	VE/YE	16 dpf	Anterior Primitive Streak	E7.25
TGCCCATCAACACGCC	hPGCLC	Replicate 2	E-PGC	16 dpf	Epiblast	E7
TGCCCTAGTACGACCC	Ectoderm	Replicate 2	EXMC	17 dpf	Mesenchyme	E7.5
TGCCCTAGTCGAGATG	Ectoderm	Replicate 2	postL-EPI	16 dpf	Primitive Streak	E7.25
TGCGCAGCAGGACCCT	EPI-like	Replicate 2	postE-EPI	14 dpf	Epiblast	E6.5
TGCGCAGCATATACCG	hPGCLC	Replicate 2	E-PGC	16 dpf	Epiblast	E7.25
TGCGCAGGTCGAATCT	Endoderm	Replicate 2	VE/YE	16 dpf	Primitive Streak	E7
TGCGCAGGTGCAACTT	Endoderm	Replicate 2	VE/YE	16 dpf	ExE endoderm	E7.5
TGCGGGTTCTCTAAGG	hPGCLC	Replicate 2	E-PGC	16 dpf	Epiblast	E7.25
TGCTACCAGCCATCGC	Ectoderm	Replicate 2	E-PGC	16 dpf	ExE endoderm	E7.5
TGCTACCAGCTACCGC	Endoderm	Replicate 2	EXMC	16 dpf	ExE ectoderm	E7.5
TGCTACCGTCAGAAGC	Mesoderm-2	Replicate 2	EXMC	12 dpf	Nascent mesoderm	E7.25
TGCTGCTAGCACCGCT	Mesoderm-1	Replicate 2	postE-EPI	16 dpf	Epiblast	E7.25
TGCTGCTCACATTCGA	ExE-like	Replicate 2	TE and derivatives	16 dpf	ExE ectoderm	E7.5
TGGACGCCAGCGATCC	Mesoderm-2	Replicate 2	EXMC	12 dpf	Nascent mesoderm	E7.25
TGGACGCCAGTCCTTC	ExE-like	Replicate 2	TE and derivatives	16 dpf	ExE ectoderm	E7.25
TGGACGCGTTATCGGT	Ectoderm	Replicate 2	EXMC	17 dpf	Mesenchyme	E7.5
TGGACGCGTTCATGGT	hPGCLC	Replicate 2	E-AM	16 dpf	ExE ectoderm	E7
TGGCCAGGTAGTGAAT	hPGCLC	Replicate 2	VE/YE	16 dpf	Epiblast	E7
TGGCCAGTCTACCTGC	ExE-like	Replicate 2	TE and derivatives	13 dpf	ExE ectoderm	E7
TGGCGCAAGGGTGTGT	Mesoderm-1	Replicate 2	postL-EPI	16 dpf	Epiblast	E7
TGGCGCATCAACGGGA	Mesoderm-1	Replicate 2	E-Gast	14 dpf	Nascent mesoderm	E7
TGGCGCATCACCTCGT	Endoderm	Replicate 2	VE/YE	16 dpf	Primitive Streak	E7
TGGGAAGTCTCTAAGG	ExE-like	Replicate 2	TE and derivatives	14 dpf	ExE ectoderm	E6.5
TGGTTAGAGCGGATCA	Mesoderm-1	Replicate 2	L-Gast1	16 dpf	Nascent mesoderm	E7.5
TGGTTAGGTTATCGGT	Mesoderm-2	Replicate 2	EXMC	12 dpf	Nascent mesoderm	E7.25
TGGTTCCAGCTGCCCA	Mesoderm-2	Replicate 2	EXMC	12 dpf	Nascent mesoderm	E7.25
TGTCCCAAGTGCGTGA	Mesoderm-1	Replicate 2	EXMC	14 dpf	Nascent mesoderm	E7.5
TGTCCCACAACTTGAC	EPI-like	Replicate 2	postE-EPI	14 dpf	Epiblast	E7
TGTCCCAGTTAGTGGG	hPGCLC	Replicate 2	E-PGC	16 dpf	Epiblast	E7
TGTGGTATCGTTTAGG	Mesoderm-2	Replicate 2	EXMC	12 dpf	Nascent mesoderm	E7.5
TGTGTTTAGGAATCGC	Endoderm	Replicate 2	L-Gast2	16 dpf	Caudal epiblast	E7.5
TGTGTTTGTACCGGCT	Mesoderm-1	Replicate 2	L-Gast1	16 dpf	Nascent mesoderm	E7
TGTGTTTGTCTCCCTA	hPGCLC	Replicate 2	E-PGC	16 dpf	ExE endoderm	E7.5
TGTGTTTGTGTGAATA	Mesoderm-1	Replicate 2	L-Gast1	16 dpf	Anterior Primitive Streak	E7.25
TGTGTTTTCACTTATC	Ectoderm	Replicate 2	EXMC	17 dpf	Mesenchyme	E7.5
TGTTCCGAGTGACATA	ExE-like	Replicate 2	TE and derivatives	16 dpf	ExE ectoderm	E7.25
TGTTCCGCACTTCGAA	ExE-like	Replicate 2	TE and derivatives	12 dpf	ExE ectoderm	E7
TGTTCCGTCCGTTGTC	ExE-like	Replicate 2	TE and derivatives	16 dpf	ExE endoderm	E7.25
TTAGGACAGTACATGA	ExE-like	Replicate 2	L-AM2	16 dpf	ExE endoderm	E7
TTAGGCACAGACGCAA	Mesoderm-2	Replicate 2	L-Gast2	16 dpf	Nascent mesoderm	E7.25
TTAGGCATCATAGCAC	hPGCLC	Replicate 2	E-AM	12 dpf	ExE endoderm	E7
TTCCCAGCACAACTGT	Mesoderm-2	Replicate 2	EXMC	12 dpf	Intermediate mesoderm	E7.5
TTCCCAGTCACCATAG	ExE-like	Replicate 2	E-AM	12 dpf	ExE ectoderm	E6.5
TTCGAAGTCCACGACG	hPGCLC	Replicate 2	E-PGC	16 dpf	ExE endoderm	E7
TTCTACACACGAGAGT	Mesoderm-2	Replicate 2	VE/YE	16 dpf	Anterior Primitive Streak	E7
TTCTACAGTGCTTCTC	Endoderm	Replicate 2	E-Gast	14 dpf	Anterior Primitive Streak	E7.25
TTCTACAGTTCAGTAC	Ectoderm	Replicate 2	postL-EPI	17 dpf	Epiblast	E7.5
TTCTCAATCAGGATCT	EPI-like	Replicate 2	postE-EPI	16 dpf	Epiblast	E7
TTCTCCTTCGGAATCT	Mesoderm-1	Replicate 2	L-Gast1	16 dpf	Primitive Streak	E7
TTCTCCTTCGTGACAT	ExE-like	Replicate 2	E-AM	16 dpf	ExE ectoderm	E7
TTCTTAGAGATCCTGT	hPGCLC	Replicate 2	E-PGC	16 dpf	Epiblast	E6.5
TTCTTAGCAGCCTGTG	hPGCLC	Replicate 2	EXMC	16 dpf	Epiblast	E7
TTCTTAGCATGATCCA	Mesoderm-1	Replicate 2	L-Gast1	16 dpf	Primitive Streak	E7
TTGAACGAGTGGCACA	ExE-like	Replicate 2	L-AM2	16 dpf	ExE ectoderm	E7
TTGAACGCAGCTCGAC	Mesoderm-2	Replicate 2	VE/YE	16 dpf	Nascent mesoderm	E7
TTGCGTCCAGGTCCAC	ExE-like	Replicate 2	TE and derivatives	12 dpf	ExE ectoderm	E7.5
TTGGAACCACCATCCT	ExE-like	Replicate 2	TE and derivatives	12 dpf	ExE ectoderm	E7.5
TTGGCAAAGGTTACCT	ExE-like	Replicate 2	TE and derivatives	16 dpf	ExE endoderm	E7
TTGTAGGTCGGCGGTT	EPI-like	Replicate 2	postL-EPI	16 dpf	Epiblast	E7
TTTACTGTCGAATCCA	Endoderm	Replicate 2	E-Gast	16 dpf	Nascent mesoderm	E7
TTTATGCCAGGTTTCA	hPGCLC	Replicate 2	E-PGC	16 dpf	Epiblast	E7
TTTCCTCAGTATCTCG	Ectoderm	Replicate 2	postE-EPI	16 dpf	Epiblast	E7.25
TTTCCTCCAATCACAC	Ectoderm	Replicate 2	EXMC	17 dpf	Mixed mesoderm	E7.25
TTTCCTCCATCGATGT	Mesoderm-2	Replicate 2	EXMC	12 dpf	Mixed mesoderm	E7.25
TTTGCGCTCCAGATCA	Endoderm	Replicate 2	L-Gast1	16 dpf	Nascent mesoderm	E7
TTTGGTTCATATACCG	hPGCLC	Replicate 2	EXMC	16 dpf	Epiblast	E7.25
TTTGTCACACCATGTA	Mesoderm-2	Replicate 2	EXMC	12 dpf	Nascent mesoderm	E7.25
TTTGTCAGTGGCTCCA	hPGCLC	Replicate 2	E-PGC	16 dpf	Epiblast	E7
TTTGTCATCACGCGGT	EPI-like	Replicate 2	postL-EPI	16 dpf	Epiblast	E7
AAACCTGAGTGCCAGA	EPI-like	Replicate 1	postE-EPI	16 dpf	Epiblast	E7
AAACCTGCATTTCACT	Ectoderm	Replicate 1	postL-EPI	16 dpf	Epiblast	E7.5
AAACCTGGTTCGCTAA	Mesoderm-1	Replicate 1	postE-EPI	14 dpf	Primitive Streak	E7.25
AAACGGGGTTAAGATG	Mesoderm-1	Replicate 1	L-Gast1	16 dpf	Primitive Streak	E7
AAAGATGAGGGTATCG	Endoderm	Replicate 1	VE/YE	16 dpf	Def. endoderm	E7.25
AAAGATGAGTTGCAGG	Mesoderm-2	Replicate 1	EXMC	12 dpf	Nascent mesoderm	E7.5
AAAGATGGTATGCTTG	ExE-like	Replicate 1	TE and derivatives	14 dpf	ExE ectoderm	E7.25
AAAGATGGTGTAATGA	Ectoderm	Replicate 1	EXMC	17 dpf	Mesenchyme	E7.5
AAAGATGTCATCATTC	EPI-like	Replicate 1	postE-EPI	16 dpf	Epiblast	E7
AAAGATGTCGCACTCT	Mesoderm-1	Replicate 1	L-Gast1	16 dpf	Primitive Streak	E7.25
AAAGCAAGTACTTAGC	Mesoderm-1	Replicate 1	E-Gast	16 dpf	Primitive Streak	E7.5
AAAGCAATCCCAAGAT	Endoderm	Replicate 1	L-Gast1	16 dpf	Primitive Streak	E7
AAAGTAGAGTTAACGA	Mesoderm-2	Replicate 1	L-Gast1	16 dpf	Primitive Streak	E7
AAAGTAGCAGGGATTG	Ectoderm	Replicate 1	postL-EPI	16 dpf	Epiblast	E7.25
AAAGTAGCATGCAATC	Ectoderm	Replicate 1	postL-EPI	17 dpf	Epiblast	E7
AAAGTAGTCATTGCCC	Mesoderm-2	Replicate 1	L-Gast2	16 dpf	Nascent mesoderm	E7
AAAGTAGTCCTCTAGC	Ectoderm	Replicate 1	E-AM	16 dpf	ExE ectoderm	E7.25
AAATGCCAGAGTAATC	EPI-like	Replicate 1	postL-EPI	16 dpf	Epiblast	E7.25
AAATGCCCAGCGATCC	EPI-like	Replicate 1	postL-EPI	16 dpf	Epiblast	E7
AAATGCCCATCACAAC	EPI-like	Replicate 1	postE-EPI	14 dpf	Epiblast	E6.5
AACACGTAGCAGCCTC	Mesoderm-1	Replicate 1	E-AM	12 dpf	Epiblast	E7
AACACGTAGTTGAGTA	EPI-like	Replicate 1	postE-EPI	14 dpf	Epiblast	E6.5
AACCATGAGGCTCATT	Endoderm	Replicate 1	E-PGC	16 dpf	Rostral neurectoderm	E7.5
AACCATGCAGTCACTA	Mesoderm-2	Replicate 1	VE/YE	16 dpf	Def. endoderm	E7.5
AACCATGGTAACGACG	EPI-like	Replicate 1	postL-EPI	16 dpf	Epiblast	E7.5
AACCATGGTAGGCTGA	Mesoderm-2	Replicate 1	EXMC	12 dpf	Mixed mesoderm	E7.25
AACCATGGTCCAGTGC	EPI-like	Replicate 1	postL-EPI	16 dpf	Epiblast	E7
AACCATGGTTTACTCT	Endoderm	Replicate 1	VE/YE	16 dpf	Anterior Primitive Streak	E7.5
AACCGCGAGCGATCCC	EPI-like	Replicate 1	postE-EPI	14 dpf	Epiblast	E7
AACCGCGAGGCATGGT	EPI-like	Replicate 1	postE-EPI	14 dpf	Epiblast	E7
AACCGCGCAGGACCCT	Ectoderm	Replicate 1	postL-EPI	17 dpf	Epiblast	E7.5
AACCGCGCAGTCGTGC	Mesoderm-1	Replicate 1	L-Gast1	16 dpf	Primitive Streak	E7.25
AACCGCGCATGGGACA	Mesoderm-1	Replicate 1	postE-EPI	14 dpf	Primitive Streak	E7
AACCGCGGTCCATGAT	Ectoderm	Replicate 1	postL-EPI	17 dpf	Rostral neurectoderm	E7.5
AACGTTGAGTGCGATG	Mesoderm-1	Replicate 1	L-Gast1	16 dpf	Anterior Primitive Streak	E7.25
AACGTTGCAAGCCATT	Mesoderm-1	Replicate 1	L-Gast1	16 dpf	Primitive Streak	E7
AACGTTGCAGGGTATG	hPGCLC	Replicate 1	E-PGC	16 dpf	ExE ectoderm	E7
AACGTTGGTCATCGGC	Mesoderm-2	Replicate 1	EXMC	11 dpf	Nascent mesoderm	E7.25
AACTCAGAGGACGAAA	Mesoderm-1	Replicate 1	L-Gast1	16 dpf	Primitive Streak	E7.25
AACTCAGCACCAACCG	EPI-like	Replicate 1	postL-EPI	16 dpf	Epiblast	E7
AACTCAGCATCGGAAG	Mesoderm-1	Replicate 1	E-Gast	16 dpf	Def. endoderm	E7.25
AACTCAGTCGTGGTCG	EPI-like	Replicate 1	postE-EPI	16 dpf	Primitive Streak	E7.25
AACTCCCAGTACTTGC	Mesoderm-2	Replicate 1	EXMC	12 dpf	Nascent mesoderm	E7
AACTCCCGTACCAGTT	Endoderm	Replicate 1	VE/YE	16 dpf	Def. endoderm	E7.5
AACTCCCTCCTGCTTG	Mesoderm-2	Replicate 1	EXMC	12 dpf	Nascent mesoderm	E7.25
AACTCTTAGACGACGT	Mesoderm-1	Replicate 1	L-Gast2	16 dpf	Nascent mesoderm	E7.25
AACTCTTAGGCGATAC	Endoderm	Replicate 1	EXMC	16 dpf	ExE endoderm	E7.5
AACTCTTAGTCTCCTC	EPI-like	Replicate 1	postE-EPI	14 dpf	Epiblast	E7
AACTCTTCACATTAGC	EPI-like	Replicate 1	postL-EPI	16 dpf	Primitive Streak	E7
AACTCTTTCACAGTAC	Mesoderm-1	Replicate 1	L-Gast1	16 dpf	Primitive Streak	E7.25
AACTGGTAGAGGACGG	Ectoderm	Replicate 1	postL-EPI	17 dpf	Rostral neurectoderm	E7.5
AACTGGTCAAGCTGAG	Mesoderm-1	Replicate 1	postE-EPI	14 dpf	Epiblast	E7.25
AACTGGTGTAGGAGTC	EPI-like	Replicate 1	postE-EPI	14 dpf	Epiblast	E7
AACTGGTGTGTTTGGT	Endoderm	Replicate 1	E-Gast	16 dpf	Epiblast	E7.25
AACTGGTGTTATGCGT	Mesoderm-2	Replicate 1	EXMC	12 dpf	Nascent mesoderm	E7.25
AACTGGTGTTATTCTC	Mesoderm-1	Replicate 1	L-Gast1	16 dpf	Primitive Streak	E7.25
AACTTTCAGACATAAC	Mesoderm-2	Replicate 1	EXMC	12 dpf	Mixed mesoderm	E7.25
AACTTTCGTTCTGGTA	Mesoderm-1	Replicate 1	L-Gast1	16 dpf	Primitive Streak	E7.25
AAGACCTGTTGAGGTG	EPI-like	Replicate 1	postL-EPI	16 dpf	Epiblast	E7
AAGACCTTCTCCGGTT	Mesoderm-1	Replicate 1	postE-EPI	14 dpf	Epiblast	E7
AAGCCGCAGAGTTGGC	EPI-like	Replicate 1	postE-EPI	16 dpf	Epiblast	E6.5
AAGCCGCCACGAGAGT	Ectoderm	Replicate 1	postL-EPI	16 dpf	Epiblast	E7
AAGGAGCCAAACGCGA	Mesoderm-1	Replicate 1	L-Gast1	16 dpf	Primitive Streak	E7
AAGGAGCTCCTAGAAC	Mesoderm-1	Replicate 1	L-Gast1	16 dpf	Primitive Streak	E7
AAGGAGCTCTGAGGGA	EPI-like	Replicate 1	postL-EPI	16 dpf	Epiblast	E7
AAGGCAGCACGACTCG	Mesoderm-1	Replicate 1	postE-EPI	16 dpf	Epiblast	E7
AAGGCAGCAGACAGGT	Ectoderm	Replicate 1	postE-EPI	16 dpf	Epiblast	E7.5
AAGGCAGCATCACGAT	EPI-like	Replicate 1	postE-EPI	16 dpf	Epiblast	E7.5
AAGGCAGGTGCAACTT	EPI-like	Replicate 1	postL-EPI	16 dpf	Epiblast	E7.25
AAGGTTCCAAGGCTCC	Ectoderm	Replicate 1	postL-EPI	17 dpf	Epiblast	E7.25
AAGTCTGAGCAATCTC	Mesoderm-1	Replicate 1	L-Gast1	16 dpf	Primitive Streak	E7.25
AAGTCTGGTCGCGAAA	ExE-like	Replicate 1	TE and derivatives	12 dpf	ExE endoderm	E7
AATCCAGAGATGCGAC	Mesoderm-1	Replicate 1	L-Gast2	16 dpf	Nascent mesoderm	E7.25
AATCCAGCACGACGAA	ExE-like	Replicate 1	TE and derivatives	12 dpf	ExE ectoderm	E7.5
AATCGGTAGCTAGCCC	EPI-like	Replicate 1	postE-EPI	14 dpf	Epiblast	E7
AATCGGTTCAGATAAG	EPI-like	Replicate 1	postE-EPI	16 dpf	Epiblast	E7
ACACCAAAGAGACTAT	Endoderm	Replicate 1	L-Gast1	16 dpf	Anterior Primitive Streak	E7
ACACCAACAAGTACCT	Mesoderm-2	Replicate 1	L-Gast2	16 dpf	Nascent mesoderm	E7
ACACCAAGTTTGCATG	EPI-like	Replicate 1	postL-EPI	16 dpf	Epiblast	E7
ACACCCTCACCGTTGG	Mesoderm-2	Replicate 1	EXMC	12 dpf	Nascent mesoderm	E7.25
ACACCCTGTTGTGGCC	EPI-like	Replicate 1	postE-EPI	14 dpf	Epiblast	E6.5
ACACCGGAGTGAAGTT	Mesoderm-2	Replicate 1	EXMC	12 dpf	Nascent mesoderm	E7
ACACCGGGTATCAGTC	Mesoderm-1	Replicate 1	E-Gast	16 dpf	Mixed mesoderm	E7.25
ACACCGGTCAGGTTCA	Mesoderm-1	Replicate 1	L-Gast1	16 dpf	Primitive Streak	E7
ACACTGAAGCGTCTAT	Mesoderm-2	Replicate 1	EXMC	12 dpf	Mixed mesoderm	E7.25
ACACTGAAGTTCGCGC	Mesoderm-1	Replicate 1	postE-EPI	12 dpf	Primitive Streak	E7
ACACTGAGTAGAGTGC	Ectoderm	Replicate 1	postL-EPI	17 dpf	Rostral neurectoderm	E7.5
ACACTGAGTGTTCTTT	Mesoderm-1	Replicate 1	postL-EPI	16 dpf	Epiblast	E7
ACAGCCGAGCACGCCT	hPGCLC	Replicate 1	E-PGC	16 dpf	Epiblast	E7
ACAGCCGAGTGCAAGC	Ectoderm	Replicate 1	postL-EPI	17 dpf	ExE ectoderm	E7
ACAGCCGCACGAGGTA	EPI-like	Replicate 1	postL-EPI	16 dpf	Epiblast	E7
ACAGCCGCAGTTCCCT	hPGCLC	Replicate 1	E-PGC	16 dpf	Epiblast	E6.5
ACAGCCGCATGAGCGA	EPI-like	Replicate 1	postE-EPI	14 dpf	Epiblast	E7
ACAGCCGGTGGCCCTA	Endoderm	Replicate 1	E-PGC	16 dpf	Primitive Streak	E7.25
ACAGCTACACCTCGGA	Mesoderm-2	Replicate 1	EXMC	12 dpf	Nascent mesoderm	E7.25
ACAGCTACACGGACAA	Endoderm	Replicate 1	VE/YE	16 dpf	ExE endoderm	E7.5
ACAGCTACAGACGCCT	Mesoderm-2	Replicate 1	VE/YE	16 dpf	Anterior Primitive Streak	E7.25
ACAGCTAGTGTGAAAT	Mesoderm-2	Replicate 1	EXMC	12 dpf	Nascent mesoderm	E7.25
ACATACGCATCACCCT	EPI-like	Replicate 1	postL-EPI	16 dpf	Epiblast	E7.25
ACATACGGTTGAACTC	Ectoderm	Replicate 1	postL-EPI	17 dpf	Epiblast	E7
ACATCAGAGGCGCTCT	EPI-like	Replicate 1	postE-EPI	16 dpf	Epiblast	E7
ACATCAGCAAGTCTGT	Mesoderm-1	Replicate 1	postE-EPI	14 dpf	Primitive Streak	E7
ACATCAGGTTAAGTAG	Mesoderm-2	Replicate 1	EXMC	12 dpf	Nascent mesoderm	E7
ACATCAGTCGTGGTCG	Mesoderm-1	Replicate 1	postE-EPI	16 dpf	Primitive Streak	E7.25
ACATCAGTCTTACCGC	Ectoderm	Replicate 1	EXMC	17 dpf	Mesenchyme	E7.5
ACATGGTCACCAGCAC	EPI-like	Replicate 1	postE-EPI	14 dpf	Epiblast	E7
ACATGGTTCTCGTATT	Mesoderm-2	Replicate 1	EXMC	16 dpf	Nascent mesoderm	E7
ACCAGTAAGTTACGGG	hPGCLC	Replicate 1	E-Gast	16 dpf	Primitive Streak	E7.25
ACCAGTAGTGTGTGCC	ExE-like	Replicate 1	E-AM	12 dpf	ExE ectoderm	E6.5
ACCCACTCACCGTTGG	EPI-like	Replicate 1	postL-EPI	16 dpf	Epiblast	E7
ACCCACTTCAACCATG	Mesoderm-2	Replicate 1	VE/YE	16 dpf	Anterior Primitive Streak	E7
ACCCACTTCTAGAGTC	hPGCLC	Replicate 1	E-PGC	16 dpf	ExE ectoderm	E6.5
ACCGTAAAGAGCTTCT	EPI-like	Replicate 1	postE-EPI	14 dpf	Epiblast	E7
ACCGTAACAGCGAACA	Ectoderm	Replicate 1	postL-EPI	17 dpf	Rostral neurectoderm	E7.5
ACCGTAAGTAACGACG	Mesoderm-1	Replicate 1	L-Gast1	16 dpf	Primitive Streak	E7.25
ACCGTAAGTACGACCC	ExE-like	Replicate 1	L-AM2	16 dpf	ExE endoderm	E7
ACCGTAAGTCAAAGCG	ExE-like	Replicate 1	L-AM2	16 dpf	ExE ectoderm	E7.5
ACCGTAAGTCTTGATG	EPI-like	Replicate 1	postE-EPI	14 dpf	Primitive Streak	E7
ACCGTAAGTTATGCGT	hPGCLC	Replicate 1	E-PGC	16 dpf	ExE ectoderm	E7
ACCGTAATCCTTTCTC	EPI-like	Replicate 1	postE-EPI	16 dpf	Epiblast	E7
ACCGTAATCTGTCCGT	Mesoderm-1	Replicate 1	L-Gast1	16 dpf	Caudal epiblast	E7.25
ACCTTTAAGCAATCTC	hPGCLC	Replicate 1	E-PGC	16 dpf	Epiblast	E7.25
ACCTTTAAGTTACGGG	hPGCLC	Replicate 1	E-PGC	16 dpf	Epiblast	E6.5
ACCTTTAGTCTAGCGC	Endoderm	Replicate 1	EXMC	16 dpf	Anterior Primitive Streak	E7
ACCTTTATCCGCGCAA	Mesoderm-2	Replicate 1	VE/YE	16 dpf	Nascent mesoderm	E7.25
ACGAGCCCACAACGCC	Mesoderm-2	Replicate 1	VE/YE	16 dpf	Anterior Primitive Streak	E7.25
ACGAGCCGTCTCCATC	Mesoderm-1	Replicate 1	E-Gast	14 dpf	Epiblast	E7
ACGAGCCTCCCGGATG	Ectoderm	Replicate 1	postL-EPI	17 dpf	Rostral neurectoderm	E7.5
ACGAGGAAGTGGGCTA	Mesoderm-1	Replicate 1	L-Gast1	16 dpf	Primitive Streak	E7.25
ACGATACCACAAGCCC	Endoderm	Replicate 1	L-Gast1	16 dpf	Anterior Primitive Streak	E7.25
ACGATACCAGGGAGAG	EPI-like	Replicate 1	postE-EPI	16 dpf	Epiblast	E7
ACGATACCATGAGCGA	Ectoderm	Replicate 1	postL-EPI	17 dpf	Epiblast	E7
ACGATACGTAGGGACT	hPGCLC	Replicate 1	E-PGC	16 dpf	Primitive Streak	E7.5
ACGATGTAGAGGTTAT	ExE-like	Replicate 1	L-AM2	16 dpf	ExE endoderm	E7
ACGATGTAGATAGGAG	hPGCLC	Replicate 1	E-PGC	16 dpf	Epiblast	E6.5
ACGATGTCAAGTTGTC	Ectoderm	Replicate 1	postL-EPI	17 dpf	Mixed mesoderm	E7.5
ACGATGTCAATCCAAC	Mesoderm-2	Replicate 1	EXMC	12 dpf	Nascent mesoderm	E7.25
ACGATGTGTAAGGGAA	ExE-like	Replicate 1	TE and derivatives	14 dpf	ExE ectoderm	E7
ACGATGTGTTGAGGTG	EPI-like	Replicate 1	postE-EPI	14 dpf	Epiblast	E7.25
ACGCAGCCATTCCTCG	EPI-like	Replicate 1	postE-EPI	14 dpf	Epiblast	E7
ACGCAGCGTATGAAAC	Mesoderm-2	Replicate 1	L-Gast2	16 dpf	Nascent mesoderm	E7
ACGCAGCTCCTCATTA	EPI-like	Replicate 1	postE-EPI	14 dpf	Epiblast	E7
ACGCAGCTCGTTTGCC	EPI-like	Replicate 1	postE-EPI	16 dpf	Epiblast	E7
ACGCCAGAGTACGTAA	Mesoderm-1	Replicate 1	L-Gast1	16 dpf	Primitive Streak	E7.25
ACGCCAGGTTGAGGTG	Mesoderm-1	Replicate 1	postE-EPI	14 dpf	Epiblast	E7
ACGCCGAAGTCTCAAC	EPI-like	Replicate 1	postE-EPI	16 dpf	Epiblast	E7
ACGCCGACAAGGGTCA	Ectoderm	Replicate 1	E-Gast	16 dpf	Mesenchyme	E7.5
ACGCCGACACCTTGTC	Mesoderm-1	Replicate 1	L-Gast1	16 dpf	Nascent mesoderm	E7
ACGCCGAGTCTCCACT	EPI-like	Replicate 1	postE-EPI	14 dpf	Epiblast	E6.5
ACGGAGAAGAGACTAT	Mesoderm-2	Replicate 1	EXMC	12 dpf	Intermediate mesoderm	E7.5
ACGGAGATCGCAGGCT	EPI-like	Replicate 1	postE-EPI	14 dpf	Epiblast	E6.5
ACGGAGATCGGAAATA	Mesoderm-2	Replicate 1	L-Gast2	16 dpf	Nascent mesoderm	E7.25
ACGGAGATCTCGTATT	EPI-like	Replicate 1	postE-EPI	14 dpf	Epiblast	E7
ACGGCCAAGACGCTTT	Mesoderm-2	Replicate 1	VE/YE	16 dpf	Anterior Primitive Streak	E7.25
ACGGCCATCGCGGATC	hPGCLC	Replicate 1	E-PGC	16 dpf	Epiblast	E7.25
ACGGGCTTCTCCAACC	EPI-like	Replicate 1	postE-EPI	14 dpf	Epiblast	E7.5
ACGGGTCGTTGGAGGT	EPI-like	Replicate 1	postE-EPI	14 dpf	ExE ectoderm	E7
ACGGGTCGTTTCGCTC	hPGCLC	Replicate 1	E-PGC	16 dpf	Epiblast	E7
ACGGGTCTCAGAAATG	Mesoderm-2	Replicate 1	L-Gast1	16 dpf	Anterior Primitive Streak	E7.25
ACGGGTCTCATTGCGA	Mesoderm-1	Replicate 1	E-Gast	14 dpf	ExE endoderm	E7.25
ACGTCAAAGAAACCAT	Ectoderm	Replicate 1	postL-EPI	17 dpf	Rostral neurectoderm	E7.5
ACGTCAAAGTAGCCGA	Ectoderm	Replicate 1	postL-EPI	17 dpf	Rostral neurectoderm	E7.5
ACGTCAAGTACCGTAT	Ectoderm	Replicate 1	EXMC	17 dpf	Mesenchyme	E7.5
ACGTCAATCACATAGC	hPGCLC	Replicate 1	E-AM	12 dpf	Surface ectoderm	E7.5
ACTATCTAGCCACTAT	Mesoderm-1	Replicate 1	E-Gast	14 dpf	Primitive Streak	E7.5
ACTATCTAGGAGTTGC	hPGCLC	Replicate 1	E-AM	16 dpf	Epiblast	E6.5
ACTGAACCACAGGCCT	hPGCLC	Replicate 1	E-PGC	16 dpf	Epiblast	E7
ACTGAACTCCAGAGGA	hPGCLC	Replicate 1	E-PGC	16 dpf	ExE endoderm	E7
ACTGAACTCTGCGACG	hPGCLC	Replicate 1	E-PGC	16 dpf	ExE ectoderm	E7
ACTGAGTAGCTATGCT	EPI-like	Replicate 1	postE-EPI	14 dpf	Epiblast	E7
ACTGAGTAGGGAACGG	EPI-like	Replicate 1	L-Gast1	16 dpf	Epiblast	E6.5
ACTGAGTTCAAAGACA	EPI-like	Replicate 1	postE-EPI	14 dpf	Epiblast	E6.5
ACTGATGAGGGTTCCC	Mesoderm-1	Replicate 1	E-Gast	16 dpf	Epiblast	E7.25
ACTGATGCACATAACC	Ectoderm	Replicate 1	postL-EPI	17 dpf	Rostral neurectoderm	E7.5
ACTGATGGTCTTCAAG	EPI-like	Replicate 1	postE-EPI	14 dpf	Epiblast	E6.5
ACTGCTCCAAGCCGTC	EPI-like	Replicate 1	postE-EPI	16 dpf	Epiblast	E7
ACTGCTCTCACTATTC	hPGCLC	Replicate 1	E-AM	16 dpf	Epiblast	E7
ACTGTCCCAAGGGTCA	EPI-like	Replicate 1	postE-EPI	14 dpf	Epiblast	E7
ACTGTCCGTCATCCCT	Endoderm	Replicate 1	VE/YE	16 dpf	Primitive Streak	E7
ACTTACTCAGTGACAG	hPGCLC	Replicate 1	E-PGC	16 dpf	Epiblast	E6.5
ACTTACTTCAGATAAG	Mesoderm-2	Replicate 1	EXMC	12 dpf	Nascent mesoderm	E7
ACTTACTTCTGCGTAA	hPGCLC	Replicate 1	E-PGC	16 dpf	Surface ectoderm	E7.5
ACTTGTTAGGTGCTAG	hPGCLC	Replicate 1	E-PGC	16 dpf	Epiblast	E7
ACTTGTTCAATGACCT	ExE-like	Replicate 1	E-AM	16 dpf	ExE ectoderm	E7.5
ACTTGTTCACCCAGTG	Mesoderm-1	Replicate 1	postL-EPI	17 dpf	Epiblast	E7
ACTTGTTTCACCCTCA	hPGCLC	Replicate 1	E-PGC	16 dpf	Epiblast	E6.5
ACTTGTTTCCGCAAGC	EPI-like	Replicate 1	postE-EPI	16 dpf	Primitive Streak	E7
ACTTGTTTCTGACCTC	Mesoderm-1	Replicate 1	L-Gast1	16 dpf	Primitive Streak	E7
ACTTTCACAAGTTGTC	ExE-like	Replicate 1	TE and derivatives	12 dpf	ExE ectoderm	E7.25
ACTTTCAGTAGCTTGT	EPI-like	Replicate 1	postE-EPI	14 dpf	Epiblast	E7
ACTTTCAGTATCGCAT	EPI-like	Replicate 1	postE-EPI	14 dpf	ExE ectoderm	E7.5
ACTTTCATCGCCAAAT	Ectoderm	Replicate 1	postL-EPI	17 dpf	Rostral neurectoderm	E7.5
AGAATAGAGCCGCCTA	Ectoderm	Replicate 1	postL-EPI	16 dpf	Epiblast	E7.25
AGAATAGCAATAACGA	ExE-like	Replicate 1	L-AM2	16 dpf	ExE endoderm	E7
AGAATAGCACGTGAGA	Mesoderm-1	Replicate 1	E-Gast	16 dpf	Primitive Streak	E7.25
AGAATAGTCCCAGGTG	Ectoderm	Replicate 1	postL-EPI	17 dpf	Rostral neurectoderm	E7.5
AGACGTTAGACTCGGA	Mesoderm-1	Replicate 1	L-Gast1	16 dpf	Primitive Streak	E7
AGACGTTAGTGGTAGC	hPGCLC	Replicate 1	E-PGC	16 dpf	ExE ectoderm	E7.5
AGACGTTGTGACGGTA	hPGCLC	Replicate 1	E-PGC	16 dpf	Epiblast	E7
AGACGTTTCTGCTGTC	hPGCLC	Replicate 1	E-PGC	16 dpf	Primitive Streak	E7.25
AGAGCGAAGTAACCCT	ExE-like	Replicate 1	TE and derivatives	14 dpf	ExE ectoderm	E7.5
AGAGCGAGTCATATCG	EPI-like	Replicate 1	postE-EPI	14 dpf	Epiblast	E7
AGAGCGAGTGCTCTTC	Mesoderm-2	Replicate 1	EXMC	16 dpf	Nascent mesoderm	E7.25
AGAGCGAGTTTGACAC	Mesoderm-1	Replicate 1	L-Gast1	16 dpf	Primitive Streak	E7.25
AGAGCGATCCGCATCT	hPGCLC	Replicate 1	E-PGC	16 dpf	ExE ectoderm	E7
AGAGCGATCTCCGGTT	Ectoderm	Replicate 1	postL-EPI	17 dpf	Rostral neurectoderm	E7.5
AGAGCTTAGATGTGTA	Mesoderm-1	Replicate 1	VE/YE	16 dpf	Anterior Primitive Streak	E7.25
AGAGCTTCACGCCAGT	Endoderm	Replicate 1	VE/YE	16 dpf	Def. endoderm	E7.25
AGAGTGGAGTTACGGG	hPGCLC	Replicate 1	E-PGC	16 dpf	ExE ectoderm	E7.5
AGAGTGGAGTTGAGAT	Mesoderm-1	Replicate 1	postE-EPI	16 dpf	Primitive Streak	E7
AGAGTGGGTTCAGACT	Mesoderm-1	Replicate 1	E-Gast	14 dpf	Mixed mesoderm	E7.5
AGAGTGGTCTGGCGAC	ExE-like	Replicate 1	TE and derivatives	16 dpf	ExE ectoderm	E7.5
AGATCTGAGCAGCCTC	ExE-like	Replicate 1	L-AM2	16 dpf	ExE ectoderm	E7.25
AGATTGCAGAATCTCC	Mesoderm-1	Replicate 1	postE-EPI	12 dpf	Epiblast	E6.5
AGATTGCAGCATCATC	Mesoderm-2	Replicate 1	EXMC	12 dpf	Nascent mesoderm	E7
AGATTGCCAACTGCGC	Ectoderm	Replicate 1	postL-EPI	17 dpf	Epiblast	E7.5
AGATTGCGTTGATTCG	hPGCLC	Replicate 1	E-PGC	16 dpf	Epiblast	E7
AGATTGCTCAACACCA	hPGCLC	Replicate 1	EXMC	16 dpf	Epiblast	E6.5
AGCAGCCGTACAGTTC	Mesoderm-1	Replicate 1	postE-EPI	16 dpf	Epiblast	E6.5
AGCATACAGACCCACC	hPGCLC	Replicate 1	E-PGC	16 dpf	Epiblast	E7.5
AGCATACAGCATCATC	Endoderm	Replicate 1	EXMC	16 dpf	Primitive Streak	E7
AGCATACCACGTCAGC	Ectoderm	Replicate 1	EXMC	17 dpf	Epiblast	E6.5
AGCATACGTACCAGTT	Mesoderm-1	Replicate 1	L-Gast1	16 dpf	Anterior Primitive Streak	E7
AGCATACGTGTGGCTC	EPI-like	Replicate 1	postE-EPI	14 dpf	ExE ectoderm	E7.5
AGCATACTCTACCAGA	Mesoderm-2	Replicate 1	L-Gast2	16 dpf	Anterior Primitive Streak	E7.25
AGCATACTCTTGCAAG	Mesoderm-1	Replicate 1	postE-EPI	16 dpf	Primitive Streak	E7
AGCCTAAAGCCAACAG	EPI-like	Replicate 1	postE-EPI	16 dpf	Epiblast	E7
AGCCTAACATCCCACT	ExE-like	Replicate 1	TE and derivatives	14 dpf	ExE ectoderm	E7.5
AGCCTAATCTGGGCCA	hPGCLC	Replicate 1	E-AM	12 dpf	Epiblast	E7
AGCGGTCAGTAGCCGA	Endoderm	Replicate 1	L-Gast1	16 dpf	Def. endoderm	E7.25
AGCGGTCAGTTAGCGG	EPI-like	Replicate 1	postL-EPI	16 dpf	ExE ectoderm	E7.5
AGCGGTCCATAAAGGT	EPI-like	Replicate 1	postE-EPI	14 dpf	Epiblast	E7
AGCGGTCGTCTCTTTA	Ectoderm	Replicate 1	postL-EPI	17 dpf	Rostral neurectoderm	E7.5
AGCGTATGTACAGCAG	hPGCLC	Replicate 1	E-PGC	16 dpf	Epiblast	E6.5
AGCGTATGTAGAGGAA	Mesoderm-1	Replicate 1	L-Gast1	16 dpf	Def. endoderm	E7.5
AGCGTATGTTTGGCGC	Endoderm	Replicate 1	EXMC	14 dpf	Primitive Streak	E7.25
AGCGTCGAGTTAGCGG	EPI-like	Replicate 1	postE-EPI	14 dpf	Epiblast	E7
AGCGTCGCACGACTCG	Mesoderm-2	Replicate 1	EXMC	14 dpf	Mesenchyme	E7.5
AGCGTCGTCTCTTGAT	Mesoderm-1	Replicate 1	postL-EPI	17 dpf	Nascent mesoderm	E7.25
AGCTCCTCAATCTACG	EPI-like	Replicate 1	postE-EPI	14 dpf	Epiblast	E7.5
AGCTCCTCAGCTCGCA	EPI-like	Replicate 1	postE-EPI	16 dpf	Epiblast	E7
AGCTCCTCATGTCTCC	Mesoderm-2	Replicate 1	VE/YE	16 dpf	Nascent mesoderm	E7
AGCTCCTGTCGCTTTC	Endoderm	Replicate 1	EXMC	16 dpf	Epiblast	E7.25
AGCTCCTGTCTTGTCC	Mesoderm-1	Replicate 1	EXMC	16 dpf	Caudal epiblast	E7.5
AGCTCCTTCCACTCCA	EPI-like	Replicate 1	postE-EPI	14 dpf	Epiblast	E7.25
AGCTCTCTCAGCTCTC	Ectoderm	Replicate 1	postL-EPI	17 dpf	Mixed mesoderm	E7.5
AGCTTGACAGGTCCAC	Mesoderm-1	Replicate 1	E-Gast	14 dpf	Primitive Streak	E7.25
AGGCCACAGCCGCCTA	Ectoderm	Replicate 1	postL-EPI	17 dpf	Epiblast	E7
AGGCCACAGTGGAGTC	Mesoderm-2	Replicate 1	L-Gast2	16 dpf	Nascent mesoderm	E7
AGGCCACAGTTAGCGG	ExE-like	Replicate 1	L-AM2	16 dpf	ExE ectoderm	E7
AGGCCACCATACGCCG	hPGCLC	Replicate 1	E-AM	16 dpf	Epiblast	E6.5
AGGCCACGTATGAATG	Mesoderm-1	Replicate 1	L-Gast1	16 dpf	Nascent mesoderm	E7
AGGCCACTCACTTCAT	Mesoderm-2	Replicate 1	L-Gast1	16 dpf	Anterior Primitive Streak	E7.25
AGGCCGTTCTTAGAGC	Mesoderm-1	Replicate 1	E-Gast	14 dpf	Primitive Streak	E7
AGGGAGTGTGATGATA	hPGCLC	Replicate 1	E-PGC	16 dpf	Epiblast	E7
AGGGAGTGTGCAGTAG	EPI-like	Replicate 1	postL-EPI	16 dpf	Epiblast	E7
AGGGAGTGTTCAGCGC	Mesoderm-2	Replicate 1	L-Gast2	16 dpf	Nascent mesoderm	E7
AGGGAGTTCACTGGGC	EPI-like	Replicate 1	postL-EPI	16 dpf	Epiblast	E7
AGGGATGAGGAATGGA	EPI-like	Replicate 1	postL-EPI	16 dpf	Epiblast	E6.5
AGGGATGCACTATCTT	ExE-like	Replicate 1	TE and derivatives	14 dpf	ExE ectoderm	E7.5
AGGGTGACAAACTGTC	Endoderm	Replicate 1	VE/YE	16 dpf	Nascent mesoderm	E7
AGGGTGACACCGAATT	Mesoderm-2	Replicate 1	L-Gast2	16 dpf	Nascent mesoderm	E7
AGGGTGACATCCTAGA	Mesoderm-1	Replicate 1	L-Gast1	16 dpf	Primitive Streak	E7
AGGGTGACATGTTGAC	Mesoderm-2	Replicate 1	L-Gast2	16 dpf	Nascent mesoderm	E7
AGGGTGATCCGAACGC	Endoderm	Replicate 1	EXMC	14 dpf	Haematoendothelial progenitors	E7.25
AGGGTGATCGGCGGTT	EPI-like	Replicate 1	postE-EPI	14 dpf	Epiblast	E7
AGGTCATAGGTAGCCA	Mesoderm-1	Replicate 1	L-Gast1	16 dpf	Anterior Primitive Streak	E7
AGGTCATAGTAGGCCA	EPI-like	Replicate 1	postL-EPI	16 dpf	Epiblast	E7
AGGTCATGTAACGACG	EPI-like	Replicate 1	postE-EPI	14 dpf	ExE ectoderm	E7.5
AGGTCATGTTGCGCAC	Mesoderm-1	Replicate 1	E-Gast	14 dpf	Epiblast	E7
AGGTCCGAGATATGGT	EPI-like	Replicate 1	postE-EPI	14 dpf	ExE ectoderm	E7.5
AGGTCCGAGTGATCGG	hPGCLC	Replicate 1	E-PGC	16 dpf	ExE endoderm	E7
AGGTCCGTCCCTTGTG	Mesoderm-2	Replicate 1	L-Gast2	16 dpf	Nascent mesoderm	E7
AGGTCCGTCGCACTCT	EPI-like	Replicate 1	postE-EPI	14 dpf	Epiblast	E7.25
AGTAGTCCATTCTCAT	Ectoderm	Replicate 1	E-AM	12 dpf	PGC	E7.25
AGTAGTCGTAAACGCG	hPGCLC	Replicate 1	E-PGC	16 dpf	Epiblast	E7.5
AGTAGTCGTACCAGTT	Endoderm	Replicate 1	L-Gast1	16 dpf	Def. endoderm	E7.25
AGTCTTTCAGTCGATT	EPI-like	Replicate 1	postE-EPI	14 dpf	Epiblast	E7.5
AGTCTTTGTCCAAGTT	ExE-like	Replicate 1	E-AM	12 dpf	ExE ectoderm	E7.5
AGTCTTTGTGCGAAAC	ExE-like	Replicate 1	TE and derivatives	12 dpf	ExE ectoderm	E7.5
AGTCTTTTCCCAACGG	ExE-like	Replicate 1	postE-EPI	14 dpf	ExE ectoderm	E7.25
AGTGAGGAGAATTGTG	Ectoderm	Replicate 1	postL-EPI	16 dpf	Epiblast	E7
AGTGAGGCAAACAACA	Ectoderm	Replicate 1	postL-EPI	17 dpf	Rostral neurectoderm	E7.5
AGTGAGGCAAGCCGTC	ExE-like	Replicate 1	TE and derivatives	12 dpf	ExE ectoderm	E7.5
AGTGGGAAGGAATCGC	Mesoderm-1	Replicate 1	E-AM	16 dpf	Epiblast	E6.5
AGTGGGAAGTATTGGA	Mesoderm-2	Replicate 1	L-Gast2	16 dpf	Def. endoderm	E7.25
AGTGGGACAGATAATG	EPI-like	Replicate 1	postL-EPI	16 dpf	Epiblast	E7.25
AGTGGGAGTCTGCAAT	Ectoderm	Replicate 1	postL-EPI	17 dpf	Rostral neurectoderm	E7.5
AGTGGGATCCCTCTTT	Mesoderm-1	Replicate 1	L-Gast1	16 dpf	Primitive Streak	E7.25
AGTGGGATCCGAATGT	Mesoderm-2	Replicate 1	VE/YE	16 dpf	Anterior Primitive Streak	E7.25
AGTGTCAAGTGGGCTA	Mesoderm-1	Replicate 1	L-Gast1	16 dpf	Anterior Primitive Streak	E7.25
AGTGTCAAGTTCGATC	Mesoderm-1	Replicate 1	L-Gast1	16 dpf	Anterior Primitive Streak	E7.25
AGTGTCACAATGGACG	Mesoderm-2	Replicate 1	EXMC	12 dpf	Nascent mesoderm	E7.25
AGTGTCAGTAGCCTCG	ExE-like	Replicate 1	L-AM2	16 dpf	ExE endoderm	E7
AGTGTCAGTCTCATCC	hPGCLC	Replicate 1	E-PGC	16 dpf	Epiblast	E6.5
AGTGTCAGTGTCCTCT	EPI-like	Replicate 1	postE-EPI	14 dpf	Epiblast	E7
AGTGTCATCAGTACGT	ExE-like	Replicate 1	TE and derivatives	12 dpf	ExE endoderm	E7
AGTGTCATCCGAATGT	EPI-like	Replicate 1	postE-EPI	14 dpf	Epiblast	E7
AGTGTCATCCGTCATC	Mesoderm-2	Replicate 1	EXMC	12 dpf	Nascent mesoderm	E7.25
AGTTGGTAGGCACATG	Mesoderm-2	Replicate 1	L-Gast2	16 dpf	Anterior Primitive Streak	E7
AGTTGGTCATCCGTGG	Ectoderm	Replicate 1	postL-EPI	17 dpf	ExE ectoderm	E7
AGTTGGTTCACATACG	EPI-like	Replicate 1	postL-EPI	16 dpf	Epiblast	E7
ATAACGCCAGTGACAG	hPGCLC	Replicate 1	E-PGC	16 dpf	Epiblast	E6.5
ATAAGAGAGGACGAAA	Mesoderm-1	Replicate 1	L-Gast1	16 dpf	Nascent mesoderm	E7.5
ATAAGAGCATGGTCAT	EPI-like	Replicate 1	postE-EPI	14 dpf	Epiblast	E7
ATAAGAGGTTAGTGGG	Mesoderm-2	Replicate 1	EXMC	16 dpf	Primitive Streak	E7
ATAAGAGGTTCTCATT	Ectoderm	Replicate 1	postL-EPI	17 dpf	Epiblast	E7.5
ATAGACCAGCACCGTC	ExE-like	Replicate 1	E-AM	12 dpf	ExE ectoderm	E7
ATAGACCAGTTCGCAT	Endoderm	Replicate 1	E-Gast	14 dpf	Primitive Streak	E7
ATAGACCCATGACATC	Mesoderm-2	Replicate 1	L-Gast2	16 dpf	Nascent mesoderm	E7
ATAGACCGTTCGCGAC	Ectoderm	Replicate 1	postL-EPI	16 dpf	Rostral neurectoderm	E7.5
ATCACGAAGCGATTCT	ExE-like	Replicate 1	TE and derivatives	16 dpf	ExE ectoderm	E7
ATCACGAAGCTAGGCA	hPGCLC	Replicate 1	E-PGC	16 dpf	Epiblast	E7
ATCACGAAGTGCGATG	ExE-like	Replicate 1	L-AM2	16 dpf	ExE endoderm	E7
ATCACGACATAAAGGT	Mesoderm-1	Replicate 1	L-Gast1	16 dpf	Primitive Streak	E7.25
ATCATCTGTGCAGTAG	Mesoderm-1	Replicate 1	L-Gast1	16 dpf	Primitive Streak	E7
ATCATGGTCGTTACGA	EPI-like	Replicate 1	postE-EPI	14 dpf	Epiblast	E7
ATCATGGTCTGATTCT	Mesoderm-2	Replicate 1	VE/YE	16 dpf	Nascent mesoderm	E7
ATCCACCAGCGTGAAC	Ectoderm	Replicate 1	EXMC	17 dpf	Surface ectoderm	E7.5
ATCCACCCACCAGTTA	hPGCLC	Replicate 1	E-PGC	16 dpf	Epiblast	E7
ATCCACCCAGTCACTA	Ectoderm	Replicate 1	EXMC	17 dpf	Mesenchyme	E7.5
ATCCACCTCAGCTCGG	EPI-like	Replicate 1	postE-EPI	14 dpf	Primitive Streak	E7.25
ATCCACCTCCTAGAAC	EPI-like	Replicate 1	postE-EPI	14 dpf	Primitive Streak	E7
ATCCGAACAAGAAAGG	hPGCLC	Replicate 1	E-PGC	16 dpf	Epiblast	E6.5
ATCCGAAGTACTTAGC	Mesoderm-1	Replicate 1	L-Gast1	16 dpf	Epiblast	E7.25
ATCCGAAGTATGCTTG	Mesoderm-1	Replicate 1	E-Gast	16 dpf	Nascent mesoderm	E7.5
ATCCGAATCAAAGTAG	Mesoderm-2	Replicate 1	VE/YE	16 dpf	Anterior Primitive Streak	E7
ATCCGAATCGTCCGTT	Mesoderm-2	Replicate 1	L-Gast2	16 dpf	Nascent mesoderm	E7
ATCGAGTAGTGAACAT	EPI-like	Replicate 1	postE-EPI	14 dpf	Primitive Streak	E7.25
ATCGAGTCATAAAGGT	ExE-like	Replicate 1	TE and derivatives	14 dpf	ExE ectoderm	E7.5
ATCGAGTCATAACCTG	ExE-like	Replicate 1	L-AM2	16 dpf	ExE endoderm	E7
ATCTACTTCGGATGTT	Mesoderm-1	Replicate 1	postE-EPI	16 dpf	Primitive Streak	E7.25
ATCTACTTCTCAACTT	ExE-like	Replicate 1	E-AM	12 dpf	ExE ectoderm	E7
ATCTGCCCAAACGCGA	EPI-like	Replicate 1	L-Gast1	16 dpf	Primitive Streak	E7
ATCTGCCGTATTCGTG	EPI-like	Replicate 1	postE-EPI	14 dpf	Epiblast	E7
ATCTGCCGTCTAGGTT	hPGCLC	Replicate 1	E-PGC	16 dpf	Primitive Streak	E7
ATGAGGGAGGCTACGA	Mesoderm-1	Replicate 1	postE-EPI	14 dpf	Epiblast	E6.5
ATGAGGGCAAATACAG	ExE-like	Replicate 1	TE and derivatives	12 dpf	ExE ectoderm	E6.75
ATGAGGGCATGTAAGA	Mesoderm-2	Replicate 1	EXMC	16 dpf	Nascent mesoderm	E7.25
ATGAGGGGTTACGCGC	hPGCLC	Replicate 1	E-Gast	16 dpf	Epiblast	E7.25
ATGAGGGGTTCGTCTC	Ectoderm	Replicate 1	postL-EPI	16 dpf	Epiblast	E7
ATGAGGGTCAGGATCT	Mesoderm-2	Replicate 1	VE/YE	16 dpf	ExE endoderm	E7.5
ATGCGATAGCACAGGT	Mesoderm-1	Replicate 1	L-Gast1	16 dpf	Primitive Streak	E7.25
ATGCGATCAACTTGAC	Endoderm	Replicate 1	VE/YE	16 dpf	Anterior Primitive Streak	E7.25
ATGCGATGTTATCGGT	Ectoderm	Replicate 1	postL-EPI	17 dpf	Rostral neurectoderm	E7.5
ATGCGATTCGTGACAT	Mesoderm-2	Replicate 1	EXMC	11 dpf	Mixed mesoderm	E7.25
ATGGGAGAGAGTCGGT	EPI-like	Replicate 1	postE-EPI	14 dpf	Primitive Streak	E7
ATGGGAGGTGAAGGCT	hPGCLC	Replicate 1	E-PGC	16 dpf	Epiblast	E7.25
ATGGGAGTCCATGAAC	ExE-like	Replicate 1	TE and derivatives	12 dpf	ExE ectoderm	E7.25
ATGTGTGAGGCACATG	ExE-like	Replicate 1	E-AM	12 dpf	Mesenchyme	E7.5
ATGTGTGCACATGGGA	Mesoderm-1	Replicate 1	postL-EPI	16 dpf	Epiblast	E6.5
ATGTGTGGTAGGGTAC	Endoderm	Replicate 1	E-AM	12 dpf	Gut	E7.5
ATGTGTGGTCACTGGC	Mesoderm-1	Replicate 1	L-Gast1	16 dpf	Nascent mesoderm	E7.25
ATGTGTGGTTCTGGTA	Mesoderm-1	Replicate 1	L-Gast1	16 dpf	Primitive Streak	E7
ATGTGTGTCACCGTAA	EPI-like	Replicate 1	postL-EPI	16 dpf	Epiblast	E7.25
ATGTGTGTCATCGGAT	EPI-like	Replicate 1	postE-EPI	14 dpf	Epiblast	E7
ATGTGTGTCCAGAGGA	Ectoderm	Replicate 1	postE-EPI	16 dpf	Epiblast	E7
ATGTGTGTCCGAATGT	Mesoderm-1	Replicate 1	L-Gast1	16 dpf	Primitive Streak	E7
ATGTGTGTCGCACTCT	Mesoderm-1	Replicate 1	L-Gast1	16 dpf	Primitive Streak	E7.25
ATTACTCAGAGAACAG	Ectoderm	Replicate 1	EXMC	17 dpf	ExE mesoderm	E7.5
ATTACTCAGCTAAACA	Mesoderm-2	Replicate 1	VE/YE	16 dpf	Anterior Primitive Streak	E7
ATTACTCCAAGCTGTT	ExE-like	Replicate 1	L-AM2	16 dpf	ExE ectoderm	E7.5
ATTACTCCAGTCCTTC	EPI-like	Replicate 1	postE-EPI	14 dpf	Primitive Streak	E7.25
ATTACTCTCTCGAGTA	hPGCLC	Replicate 1	EXMC	16 dpf	Blood progenitors 2	E7.5
ATTATCCAGAATAGGG	ExE-like	Replicate 1	E-AM	12 dpf	ExE ectoderm	E7.25
ATTATCCCAACTGGCC	Mesoderm-1	Replicate 1	L-Gast1	16 dpf	Nascent mesoderm	E7
ATTATCCCATGCCTAA	Mesoderm-1	Replicate 1	postE-EPI	14 dpf	Primitive Streak	E7
ATTATCCGTAGAGGAA	hPGCLC	Replicate 1	E-PGC	16 dpf	ExE ectoderm	E7.5
ATTATCCTCAGTTAGC	ExE-like	Replicate 1	E-AM	12 dpf	ExE ectoderm	E6.5
ATTCTACAGCCACTAT	Mesoderm-2	Replicate 1	EXMC	12 dpf	Nascent mesoderm	E7
ATTCTACAGGTGCTAG	Mesoderm-1	Replicate 1	L-Gast1	16 dpf	Nascent mesoderm	E7
ATTCTACCATCCCATC	hPGCLC	Replicate 1	E-AM	12 dpf	Epiblast	E7.5
ATTCTACGTCGGCTCA	EPI-like	Replicate 1	postE-EPI	14 dpf	Epiblast	E7
ATTCTACGTCTAGTGT	Mesoderm-1	Replicate 1	postL-EPI	17 dpf	Def. endoderm	E7.5
ATTCTACGTGAAGGCT	Mesoderm-1	Replicate 1	postE-EPI	16 dpf	Epiblast	E7
ATTCTACTCGGTGTCG	EPI-like	Replicate 1	postE-EPI	14 dpf	Epiblast	E7.25
ATTGGACAGATCGGGT	Mesoderm-1	Replicate 1	L-Gast1	16 dpf	Anterior Primitive Streak	E7.25
ATTGGACAGTTGTCGT	Ectoderm	Replicate 1	postL-EPI	17 dpf	ExE ectoderm	E7
ATTGGACCATCCGTGG	Endoderm	Replicate 1	VE/YE	13 dpf	Primitive Streak	E7.5
ATTGGACGTCGGCATC	Mesoderm-2	Replicate 1	EXMC	12 dpf	Mixed mesoderm	E7.25
ATTGGACGTTCCAACA	ExE-like	Replicate 1	TE and derivatives	12 dpf	ExE endoderm	E7
ATTGGACTCAGATAAG	Mesoderm-2	Replicate 1	L-Gast2	16 dpf	Nascent mesoderm	E7
ATTGGACTCATGTAGC	hPGCLC	Replicate 1	EXMC	16 dpf	Epiblast	E7.5
ATTGGACTCCAGATCA	Mesoderm-1	Replicate 1	L-Gast1	16 dpf	Primitive Streak	E7
ATTGGTGAGGTGATTA	Endoderm	Replicate 1	EXMC	16 dpf	Def. endoderm	E7.25
ATTGGTGTCAGGCGAA	Mesoderm-1	Replicate 1	postE-EPI	14 dpf	Epiblast	E7
ATTTCTGCAGTTCATG	hPGCLC	Replicate 1	E-PGC	16 dpf	Epiblast	E7
ATTTCTGGTGGCTCCA	Mesoderm-2	Replicate 1	VE/YE	16 dpf	Nascent mesoderm	E7
CAACCAAAGAATTCCC	hPGCLC	Replicate 1	E-PGC	16 dpf	Rostral neurectoderm	E7.5
CAACCAAAGCTGCGAA	Mesoderm-1	Replicate 1	L-Gast1	14 dpf	Primitive Streak	E7
CAACCAATCTCGTATT	Mesoderm-1	Replicate 1	L-Gast1	16 dpf	Primitive Streak	E7.25
CAACCTCGTCGAAAGC	Mesoderm-2	Replicate 1	EXMC	12 dpf	Nascent mesoderm	E7
CAACTAGCAGCCTATA	Mesoderm-1	Replicate 1	L-Gast1	16 dpf	Primitive Streak	E7.25
CAACTAGGTTGCCTCT	Mesoderm-2	Replicate 1	EXMC	11 dpf	Nascent mesoderm	E7.25
CAACTAGTCGCGTAGC	Mesoderm-1	Replicate 1	EXMC	16 dpf	Def. endoderm	E7.25
CAACTAGTCGGCATCG	Mesoderm-1	Replicate 1	E-Gast	16 dpf	Caudal epiblast	E7.5
CAAGAAAAGAGGGATA	Endoderm	Replicate 1	L-Gast2	16 dpf	Anterior Primitive Streak	E7.25
CAAGAAACAGCTGCTG	Mesoderm-1	Replicate 1	E-Gast	16 dpf	Primitive Streak	E7.25
CAAGAAACATTCTTAC	hPGCLC	Replicate 1	E-PGC	16 dpf	ExE ectoderm	E7
CAAGAAAGTCAATACC	EPI-like	Replicate 1	postE-EPI	14 dpf	Epiblast	E7
CAAGAAATCGCCTGTT	Ectoderm	Replicate 1	EXMC	17 dpf	Mesenchyme	E7.5
CAAGAAATCTACTCAT	Mesoderm-1	Replicate 1	E-Gast	16 dpf	Epiblast	E7.25
CAAGAAATCTTAGCCC	Endoderm	Replicate 1	VE/YE	16 dpf	Def. endoderm	E7.5
CAAGATCCACGCATCG	EPI-like	Replicate 1	postE-EPI	16 dpf	Epiblast	E7
CAAGATCGTCGAAAGC	Ectoderm	Replicate 1	postL-EPI	16 dpf	Epiblast	E7.25
CAAGGCCAGCAGCCTC	Endoderm	Replicate 1	E-Gast	16 dpf	Epiblast	E7.25
CAAGGCCAGTACGATA	Mesoderm-1	Replicate 1	L-Gast1	16 dpf	Nascent mesoderm	E7
CAAGGCCAGTGACTCT	Endoderm	Replicate 1	VE/YE	16 dpf	Def. endoderm	E7.25
CAAGGCCCAACTGCGC	Ectoderm	Replicate 1	postL-EPI	17 dpf	Epiblast	E7
CAAGGCCCAGCTGCTG	EPI-like	Replicate 1	postE-EPI	14 dpf	Epiblast	E7
CAAGGCCCATGGTCAT	hPGCLC	Replicate 1	E-PGC	16 dpf	Epiblast	E7.5
CAAGGCCGTTATCCGA	Mesoderm-2	Replicate 1	EXMC	12 dpf	Nascent mesoderm	E7
CAAGTTGCACAGCCCA	EPI-like	Replicate 1	postE-EPI	14 dpf	Primitive Streak	E7
CAAGTTGTCGCAAGCC	EPI-like	Replicate 1	postE-EPI	14 dpf	ExE ectoderm	E7.5
CACAAACAGAGGGATA	Ectoderm	Replicate 1	postL-EPI	17 dpf	Rostral neurectoderm	E7.5
CACAAACAGGCGTACA	ExE-like	Replicate 1	L-AM2	16 dpf	ExE ectoderm	E7.25
CACAAACAGTCAAGGC	Mesoderm-1	Replicate 1	L-Gast1	16 dpf	Primitive Streak	E7.25
CACAAACCAGATTGCT	Mesoderm-1	Replicate 1	L-Gast1	16 dpf	Primitive Streak	E7
CACAAACGTTCGTCTC	EPI-like	Replicate 1	postL-EPI	16 dpf	Epiblast	E7
CACAAACTCGGAAACG	EPI-like	Replicate 1	postE-EPI	14 dpf	Epiblast	E7
CACACAAGTACTCGCG	Ectoderm	Replicate 1	postL-EPI	16 dpf	Epiblast	E7
CACACAAGTTTAGGAA	Ectoderm	Replicate 1	EXMC	17 dpf	Mesenchyme	E7.5
CACACCTAGGACACCA	EPI-like	Replicate 1	postL-EPI	16 dpf	Epiblast	E7.25
CACACCTCAACGATGG	Mesoderm-1	Replicate 1	postE-EPI	12 dpf	Epiblast	E7.25
CACACCTGTACCGGCT	hPGCLC	Replicate 1	E-PGC	16 dpf	Epiblast	E7.25
CACACCTTCAACGAAA	Mesoderm-2	Replicate 1	L-Gast2	16 dpf	Nascent mesoderm	E7.5
CACACCTTCTCGCTTG	EPI-like	Replicate 1	postL-EPI	16 dpf	Epiblast	E7
CACACTCGTGAGCGAT	EPI-like	Replicate 1	postE-EPI	14 dpf	Epiblast	E7.25
CACACTCTCATCGATG	hPGCLC	Replicate 1	E-PGC	16 dpf	Epiblast	E6.5
CACACTCTCGGGAGTA	Mesoderm-1	Replicate 1	postE-EPI	16 dpf	Primitive Streak	E7.25
CACAGGCAGCTGAAAT	Mesoderm-2	Replicate 1	EXMC	14 dpf	Nascent mesoderm	E7
CACAGGCCACAGCGTC	ExE-like	Replicate 1	L-AM2	16 dpf	ExE endoderm	E7.25
CACAGGCCATTAGCCA	Endoderm	Replicate 1	VE/YE	14 dpf	ExE endoderm	E7.5
CACAGGCTCAAACCGT	hPGCLC	Replicate 1	E-PGC	16 dpf	Epiblast	E6.5
CACAGTACAGGACCCT	Mesoderm-2	Replicate 1	EXMC	16 dpf	Nascent mesoderm	E7.25
CACAGTAGTTGGGACA	Mesoderm-2	Replicate 1	L-Gast1	16 dpf	Nascent mesoderm	E7.5
CACATAGCAAGCGATG	Endoderm	Replicate 1	VE/YE	16 dpf	Def. endoderm	E7.5
CACATAGGTTGGGACA	Endoderm	Replicate 1	EXMC	14 dpf	Blood progenitors 2	E7.5
CACATAGTCACCTTAT	hPGCLC	Replicate 1	E-PGC	16 dpf	ExE endoderm	E7
CACATTTAGAATTGTG	Mesoderm-2	Replicate 1	EXMC	12 dpf	Nascent mesoderm	E7
CACATTTCATTGAGCT	Mesoderm-1	Replicate 1	postL-EPI	16 dpf	Epiblast	E6.5
CACATTTGTATAGGGC	ExE-like	Replicate 1	L-Gast1	14 dpf	ExE endoderm	E7
CACATTTGTGCTTCTC	Mesoderm-1	Replicate 1	postE-EPI	14 dpf	Caudal epiblast	E7.5
CACCACTAGGCGATAC	Ectoderm	Replicate 1	postL-EPI	17 dpf	Rostral neurectoderm	E7.5
CACCACTCAAAGGCGT	Mesoderm-2	Replicate 1	EXMC	12 dpf	Nascent mesoderm	E7.25
CACCACTTCATATCGG	Mesoderm-2	Replicate 1	VE/YE	16 dpf	Anterior Primitive Streak	E7
CACCAGGAGTAGCGGT	EPI-like	Replicate 1	postE-EPI	14 dpf	Primitive Streak	E7
CACCAGGGTGTGCGTC	EPI-like	Replicate 1	postE-EPI	14 dpf	Epiblast	E7.25
CACCAGGTCAACACGT	Mesoderm-1	Replicate 1	E-Gast	14 dpf	Epiblast	E7
CACCAGGTCGTAGATC	EPI-like	Replicate 1	postL-EPI	16 dpf	Epiblast	E7
CACCAGGTCGTTACAG	Ectoderm	Replicate 1	postL-EPI	17 dpf	Def. endoderm	E7.25
CACCTTGCAATAGAGT	Mesoderm-2	Replicate 1	VE/YE	16 dpf	Nascent mesoderm	E7
CACCTTGGTACGACCC	Mesoderm-1	Replicate 1	L-Gast1	16 dpf	Caudal epiblast	E7.5
CACTCCAGTGCTTCTC	hPGCLC	Replicate 1	E-PGC	16 dpf	Primitive Streak	E7.25
CAGAATCAGAATCTCC	Mesoderm-1	Replicate 1	postE-EPI	14 dpf	Epiblast	E7
CAGAATCCATTCCTCG	hPGCLC	Replicate 1	E-AM	16 dpf	ExE ectoderm	E7
CAGAGAGCAGCCTGTG	EPI-like	Replicate 1	postL-EPI	16 dpf	Epiblast	E7
CAGAGAGTCTTTCCTC	EPI-like	Replicate 1	postE-EPI	14 dpf	Epiblast	E7
CAGATCATCCACGACG	ExE-like	Replicate 1	E-AM	12 dpf	ExE ectoderm	E7
CAGATCATCCCAAGTA	hPGCLC	Replicate 1	E-PGC	16 dpf	Epiblast	E6.5
CAGCAGCCACACATGT	Mesoderm-2	Replicate 1	EXMC	12 dpf	Nascent mesoderm	E7
CAGCAGCGTTCCACGG	EPI-like	Replicate 1	postE-EPI	14 dpf	Epiblast	E7
CAGCAGCTCAGCCTAA	EPI-like	Replicate 1	postE-EPI	14 dpf	Epiblast	E7.25
CAGCATAAGCCATCGC	EPI-like	Replicate 1	postE-EPI	14 dpf	Primitive Streak	E7.25
CAGCATAAGTACTTGC	Endoderm	Replicate 1	EXMC	16 dpf	Primitive Streak	E7
CAGCATATCACTTACT	EPI-like	Replicate 1	postE-EPI	14 dpf	Epiblast	E7
CAGCATATCGTTGCCT	Ectoderm	Replicate 1	postL-EPI	17 dpf	Epiblast	E7
CAGCCGACAATAACGA	Ectoderm	Replicate 1	EXMC	17 dpf	Mesenchyme	E7.5
CAGCCGATCGTGGACC	Endoderm	Replicate 1	EXMC	14 dpf	Epiblast	E7.5
CAGCCGATCTATCGCC	hPGCLC	Replicate 1	E-PGC	16 dpf	Epiblast	E7
CAGCCGATCTGTCTCG	EPI-like	Replicate 1	postE-EPI	14 dpf	Epiblast	E7.25
CAGCGACCAATCGGTT	Mesoderm-1	Replicate 1	L-Gast1	16 dpf	Nascent mesoderm	E7
CAGCGACTCCACTGGG	Ectoderm	Replicate 1	postL-EPI	17 dpf	ExE ectoderm	E7.25
CAGCTAAGTGTTTGGT	Mesoderm-1	Replicate 1	E-Gast	14 dpf	Epiblast	E7
CAGCTAAGTTCCCTTG	Mesoderm-1	Replicate 1	postE-EPI	16 dpf	Epiblast	E7
CAGCTAATCGACGGAA	Mesoderm-2	Replicate 1	EXMC	12 dpf	Nascent mesoderm	E7
CAGCTGGAGTAATCCC	EPI-like	Replicate 1	postL-EPI	16 dpf	Epiblast	E7.25
CAGCTGGCATCAGTCA	EPI-like	Replicate 1	postE-EPI	14 dpf	Epiblast	E7
CAGGTGCAGACCTTTG	EPI-like	Replicate 1	postE-EPI	16 dpf	Epiblast	E7
CAGGTGCAGTTCGATC	Endoderm	Replicate 1	VE/YE	16 dpf	ExE endoderm	E7.5
CAGGTGCCAAGTTCTG	Ectoderm	Replicate 1	postE-EPI	16 dpf	Epiblast	E7.5
CAGGTGCCACGGTTTA	hPGCLC	Replicate 1	E-PGC	16 dpf	Epiblast	E7.25
CAGGTGCGTCCGAATT	ExE-like	Replicate 1	L-AM2	16 dpf	ExE ectoderm	E7
CAGGTGCTCACGCATA	ExE-like	Replicate 1	TE and derivatives	16 dpf	ExE endoderm	E7
CAGGTGCTCATCATTC	EPI-like	Replicate 1	postE-EPI	14 dpf	Epiblast	E7.5
CAGGTGCTCTCTAGGA	Mesoderm-2	Replicate 1	EXMC	12 dpf	Nascent mesoderm	E7.25
CAGTAACAGGACCACA	Mesoderm-2	Replicate 1	L-Gast2	16 dpf	Nascent mesoderm	E7
CAGTAACAGTACCGGA	Mesoderm-1	Replicate 1	postE-EPI	16 dpf	Epiblast	E7
CAGTAACCAATCGGTT	Ectoderm	Replicate 1	postL-EPI	16 dpf	Epiblast	E7
CAGTAACCACGCATCG	EPI-like	Replicate 1	postE-EPI	14 dpf	Epiblast	E7
CAGTAACTCCTCGCAT	Mesoderm-1	Replicate 1	L-Gast1	16 dpf	Primitive Streak	E7.25
CAGTAACTCTCCCTGA	EPI-like	Replicate 1	postE-EPI	16 dpf	Epiblast	E7
CAGTCCTAGGAGTTGC	Mesoderm-2	Replicate 1	EXMC	12 dpf	Nascent mesoderm	E7
CAGTCCTTCATTTGGG	Ectoderm	Replicate 1	postE-EPI	16 dpf	Epiblast	E7
CAGTCCTTCCACTGGG	EPI-like	Replicate 1	postE-EPI	14 dpf	Epiblast	E7
CATATGGAGATATACG	Ectoderm	Replicate 1	postL-EPI	16 dpf	Epiblast	E7.25
CATATGGAGTTGTCGT	EPI-like	Replicate 1	postL-EPI	16 dpf	Epiblast	E7
CATATGGCATGTAGTC	Mesoderm-2	Replicate 1	VE/YE	16 dpf	Nascent mesoderm	E7.5
CATATTCAGGCCCGTT	EPI-like	Replicate 1	postE-EPI	16 dpf	Epiblast	E7
CATATTCCAGCCACCA	Ectoderm	Replicate 1	postL-EPI	17 dpf	Primitive Streak	E7.25
CATATTCCATCTATGG	Mesoderm-1	Replicate 1	E-Gast	14 dpf	Epiblast	E7
CATATTCGTAGGAGTC	EPI-like	Replicate 1	postE-EPI	14 dpf	Epiblast	E7
CATATTCGTCCGACGT	Mesoderm-2	Replicate 1	EXMC	12 dpf	Nascent mesoderm	E7.25
CATATTCGTCGCTTCT	hPGCLC	Replicate 1	E-PGC	16 dpf	Mixed mesoderm	E7.5
CATATTCGTCTCTCGT	hPGCLC	Replicate 1	E-PGC	16 dpf	Epiblast	E7
CATATTCTCTAACGGT	Mesoderm-1	Replicate 1	L-Gast1	16 dpf	Nascent mesoderm	E7
CATCAAGAGATAGGAG	Ectoderm	Replicate 1	postL-EPI	17 dpf	Rostral neurectoderm	E7.5
CATCAAGCACATAACC	Mesoderm-1	Replicate 1	L-Gast1	16 dpf	Primitive Streak	E7.25
CATCAAGGTAGAGCTG	Endoderm	Replicate 1	EXMC	16 dpf	Epiblast	E7
CATCAAGGTGTGCCTG	Ectoderm	Replicate 1	postL-EPI	17 dpf	Epiblast	E7
CATCAGATCCGGGTGT	Endoderm	Replicate 1	L-Gast1	16 dpf	Primitive Streak	E7.25
CATCGAAAGACAATAC	EPI-like	Replicate 1	postL-EPI	16 dpf	Epiblast	E7
CATCGAAAGATCTGCT	Mesoderm-1	Replicate 1	L-Gast1	16 dpf	Nascent mesoderm	E7.5
CATCGAAAGTCACGCC	EPI-like	Replicate 1	postE-EPI	14 dpf	Epiblast	E7
CATCGAACAAAGTGCG	ExE-like	Replicate 1	postL-EPI	17 dpf	ExE ectoderm	E7.5
CATCGAACACCTGGTG	ExE-like	Replicate 1	TE and derivatives	14 dpf	ExE ectoderm	E7.25
CATCGAAGTTAAAGAC	ExE-like	Replicate 1	TE and derivatives	14 dpf	ExE ectoderm	E6.5
CATCGAATCACCTTAT	Ectoderm	Replicate 1	E-AM	12 dpf	ExE ectoderm	E7.5
CATCGGGAGCCTATGT	ExE-like	Replicate 1	E-AM	14 dpf	ExE ectoderm	E7.5
CATCGGGAGTGGCACA	Endoderm	Replicate 1	VE/YE	16 dpf	Def. endoderm	E7.25
CATCGGGCAAGCCTAT	EPI-like	Replicate 1	postL-EPI	16 dpf	Epiblast	E7
CATGACAAGCTCTCGG	Mesoderm-1	Replicate 1	postE-EPI	14 dpf	Primitive Streak	E7
CATGACAAGGGAACGG	Mesoderm-2	Replicate 1	EXMC	12 dpf	Mixed mesoderm	E7.5
CATGACAAGTTGTCGT	Endoderm	Replicate 1	EXMC	12 dpf	Nascent mesoderm	E7
CATGACACAGATGAGC	Mesoderm-1	Replicate 1	E-Gast	16 dpf	Primitive Streak	E7.25
CATGACACATCCGTGG	Ectoderm	Replicate 1	postL-EPI	17 dpf	Rostral neurectoderm	E7.5
CATGACATCTGAGGGA	Ectoderm	Replicate 1	postL-EPI	17 dpf	Mixed mesoderm	E7.5
CATGCCTAGGTGTGGT	ExE-like	Replicate 1	L-AM2	16 dpf	ExE endoderm	E7
CATGCCTCAATGTAAG	Mesoderm-2	Replicate 1	L-Gast2	16 dpf	Nascent mesoderm	E7
CATGCCTGTCGATTGT	EPI-like	Replicate 1	postE-EPI	14 dpf	Epiblast	E7
CATGCCTGTTTGTTTC	Endoderm	Replicate 1	VE/YE	16 dpf	ExE endoderm	E7.5
CATGGCGGTCGCTTCT	Mesoderm-2	Replicate 1	EXMC	12 dpf	Nascent mesoderm	E7
CATGGCGGTGTAACGG	Mesoderm-1	Replicate 1	L-Gast2	16 dpf	Intermediate mesoderm	E7.5
CATTATCAGAGTGAGA	EPI-like	Replicate 1	postE-EPI	14 dpf	Epiblast	E7
CATTATCAGATGCCTT	Mesoderm-1	Replicate 1	L-Gast1	16 dpf	Nascent mesoderm	E7
CATTATCGTAAGTAGT	EPI-like	Replicate 1	postL-EPI	16 dpf	ExE ectoderm	E7.5
CATTCGCAGCGTTGCC	Ectoderm	Replicate 1	postL-EPI	17 dpf	Rostral neurectoderm	E7.5
CATTCGCAGGTTACCT	Ectoderm	Replicate 1	postL-EPI	17 dpf	Rostral neurectoderm	E7.5
CATTCGCAGTCGTACT	Mesoderm-1	Replicate 1	L-Gast1	16 dpf	Nascent mesoderm	E7
CATTCGCCATCGTCGG	Mesoderm-2	Replicate 1	EXMC	11 dpf	Mixed mesoderm	E7.25
CATTCGCGTGCTAGCC	ExE-like	Replicate 1	TE and derivatives	12 dpf	ExE ectoderm	E7.5
CATTCGCGTTATGTGC	EPI-like	Replicate 1	postE-EPI	14 dpf	Epiblast	E7.25
CCAATCCGTCTCTTTA	EPI-like	Replicate 1	postE-EPI	14 dpf	Primitive Streak	E7
CCAATCCGTTCACCTC	ExE-like	Replicate 1	TE and derivatives	12 dpf	ExE ectoderm	E7.5
CCACCTACAGCCTTGG	Mesoderm-2	Replicate 1	EXMC	12 dpf	Nascent mesoderm	E7.25
CCACCTAGTAAATGAC	EPI-like	Replicate 1	postE-EPI	14 dpf	Epiblast	E7
CCACCTAGTCTAAAGA	EPI-like	Replicate 1	postL-EPI	16 dpf	Epiblast	E7
CCACCTAGTTACGGAG	Ectoderm	Replicate 1	postL-EPI	17 dpf	Rostral neurectoderm	E7.5
CCACCTATCCCATTTA	EPI-like	Replicate 1	postE-EPI	14 dpf	Epiblast	E7.25
CCACCTATCCGCAAGC	EPI-like	Replicate 1	postL-EPI	16 dpf	Epiblast	E7
CCACGGAAGCCCGAAA	Mesoderm-1	Replicate 1	E-Gast	14 dpf	Epiblast	E7.25
CCACGGAGTCCTAGCG	Mesoderm-1	Replicate 1	L-Gast1	16 dpf	Primitive Streak	E7.25
CCACGGAGTTCCACAA	Mesoderm-2	Replicate 1	VE/YE	16 dpf	Nascent mesoderm	E7
CCACGGAGTTTGGCGC	Endoderm	Replicate 1	E-Gast	16 dpf	Gut	E7.5
CCACGGATCTGACCTC	Ectoderm	Replicate 1	EXMC	17 dpf	Mesenchyme	E7.5
CCACTACGTAAGGGAA	EPI-like	Replicate 1	postE-EPI	14 dpf	Epiblast	E6.5
CCACTACGTACGCTGC	ExE-like	Replicate 1	TE and derivatives	12 dpf	ExE ectoderm	E7.5
CCACTACTCACGATGT	EPI-like	Replicate 1	postE-EPI	16 dpf	Epiblast	E7
CCACTACTCGCGTAGC	Ectoderm	Replicate 1	postL-EPI	16 dpf	Epiblast	E7
CCACTACTCTTCATGT	Mesoderm-1	Replicate 1	postE-EPI	14 dpf	Epiblast	E7
CCAGCGACACAAGTAA	Mesoderm-1	Replicate 1	E-Gast	14 dpf	Primitive Streak	E7.25
CCAGCGATCCCGACTT	Mesoderm-1	Replicate 1	L-Gast1	16 dpf	Nascent mesoderm	E7.25
CCATGTCAGGACACCA	Mesoderm-1	Replicate 1	E-Gast	16 dpf	Intermediate mesoderm	E7.5
CCATGTCGTGGAAAGA	Mesoderm-1	Replicate 1	L-Gast1	16 dpf	Nascent mesoderm	E7
CCATGTCGTTTGCATG	EPI-like	Replicate 1	postE-EPI	16 dpf	Epiblast	E7
CCATTCGCAGACGCTC	ExE-like	Replicate 1	TE and derivatives	12 dpf	ExE ectoderm	E7.5
CCATTCGGTCACCCAG	EPI-like	Replicate 1	postE-EPI	14 dpf	Epiblast	E7
CCCAATCCAAGCCTAT	Mesoderm-1	Replicate 1	postE-EPI	16 dpf	Epiblast	E7.25
CCCAATCGTGTCGCTG	Ectoderm	Replicate 1	postL-EPI	17 dpf	Rostral neurectoderm	E7.5
CCCATACAGTGTCTCA	Mesoderm-2	Replicate 1	EXMC	12 dpf	Nascent mesoderm	E7
CCCATACTCCCACTTG	EPI-like	Replicate 1	postE-EPI	14 dpf	ExE ectoderm	E7.5
CCCATACTCTTATCTG	Mesoderm-1	Replicate 1	postL-EPI	16 dpf	ExE ectoderm	E7
CCCTCCTAGCGACGTA	ExE-like	Replicate 1	E-AM	12 dpf	ExE ectoderm	E7.5
CCCTCCTAGTAGCCGA	Mesoderm-1	Replicate 1	L-Gast1	16 dpf	Primitive Streak	E7
CCCTCCTTCAACGCTA	Mesoderm-1	Replicate 1	postE-EPI	12 dpf	Epiblast	E7.25
CCGGGATCACCACGTG	EPI-like	Replicate 1	postL-EPI	16 dpf	ExE ectoderm	E7
CCGGGATCATTGAGCT	Mesoderm-1	Replicate 1	EXMC	12 dpf	Primitive Streak	E7
CCGGTAGCAACTGCTA	EPI-like	Replicate 1	L-Gast1	16 dpf	Primitive Streak	E7.25
CCGGTAGCAAGCGTAG	Mesoderm-2	Replicate 1	EXMC	12 dpf	Nascent mesoderm	E7.25
CCGGTAGGTACATGTC	Mesoderm-1	Replicate 1	postE-EPI	14 dpf	Primitive Streak	E7.25
CCGGTAGGTAGCCTCG	hPGCLC	Replicate 1	E-PGC	16 dpf	Epiblast	E7.25
CCGGTAGGTCTGGAGA	EPI-like	Replicate 1	postE-EPI	14 dpf	Epiblast	E7
CCGGTAGTCAAGGCTT	Mesoderm-2	Replicate 1	EXMC	12 dpf	Nascent mesoderm	E7
CCGTACTCATCGATTG	Mesoderm-2	Replicate 1	L-Gast1	16 dpf	Anterior Primitive Streak	E7.25
CCGTACTGTGACAAAT	hPGCLC	Replicate 1	E-PGC	16 dpf	Epiblast	E7
CCGTACTTCCTAGTGA	Mesoderm-1	Replicate 1	E-Gast	14 dpf	Primitive Streak	E7
CCGTGGAAGATCGATA	hPGCLC	Replicate 1	E-PGC	16 dpf	Epiblast	E7.25
CCGTGGAAGCAGACTG	Ectoderm	Replicate 1	postL-EPI	17 dpf	Epiblast	E7.5
CCGTGGAGTCGTCTTC	ExE-like	Replicate 1	L-AM2	16 dpf	Mesenchyme	E7.5
CCGTGGATCTATGTGG	ExE-like	Replicate 1	TE and derivatives	14 dpf	ExE ectoderm	E7.25
CCGTGGATCTGGCGTG	Mesoderm-2	Replicate 1	VE/YE	16 dpf	Anterior Primitive Streak	E7.25
CCGTTCACACCTATCC	Mesoderm-2	Replicate 1	VE/YE	16 dpf	Def. endoderm	E7.25
CCGTTCATCGCTGATA	Mesoderm-1	Replicate 1	postE-EPI	12 dpf	ExE ectoderm	E7.5
CCTAAAGAGGAGTTGC	Mesoderm-1	Replicate 1	postE-EPI	16 dpf	Epiblast	E7
CCTAAAGCATGGGACA	Mesoderm-2	Replicate 1	L-Gast2	16 dpf	Anterior Primitive Streak	E7.5
CCTAAAGGTAGCAAAT	Mesoderm-1	Replicate 1	E-Gast	14 dpf	Primitive Streak	E7.25
CCTAAAGGTGATGCCC	Ectoderm	Replicate 1	postL-EPI	17 dpf	Rostral neurectoderm	E7.5
CCTAAAGTCAGAGCTT	EPI-like	Replicate 1	postL-EPI	16 dpf	Epiblast	E7
CCTACCAAGCTAGCCC	Ectoderm	Replicate 1	postL-EPI	17 dpf	Rostral neurectoderm	E7.5
CCTACCACATCGGGTC	ExE-like	Replicate 1	TE and derivatives	12 dpf	ExE ectoderm	E7
CCTACCAGTGCACTTA	hPGCLC	Replicate 1	E-PGC	16 dpf	ExE endoderm	E7
CCTACCAGTTACGCGC	hPGCLC	Replicate 1	E-PGC	16 dpf	ExE ectoderm	E7
CCTACCATCGTTGCCT	EPI-like	Replicate 1	postE-EPI	14 dpf	Epiblast	E7
CCTAGCTCAGTTCCCT	Mesoderm-2	Replicate 1	L-Gast2	16 dpf	Nascent mesoderm	E7.25
CCTAGCTTCACGACTA	Ectoderm	Replicate 1	postL-EPI	17 dpf	Rostral neurectoderm	E7.5
CCTATTAAGACTTTCG	EPI-like	Replicate 1	postE-EPI	14 dpf	Epiblast	E7
CCTATTAAGTTATCGC	ExE-like	Replicate 1	L-AM2	16 dpf	ExE ectoderm	E7
CCTATTAGTTGGACCC	hPGCLC	Replicate 1	E-PGC	16 dpf	Primitive Streak	E7.25
CCTCAGTAGCAATCTC	Mesoderm-1	Replicate 1	E-Gast	16 dpf	Epiblast	E7
CCTCAGTCATGCAATC	Mesoderm-1	Replicate 1	E-Gast	14 dpf	Epiblast	E7.25
CCTCTGACACAAGTAA	Mesoderm-1	Replicate 1	EXMC	14 dpf	Nascent mesoderm	E7.25
CCTCTGACAGGTGGAT	Mesoderm-1	Replicate 1	E-Gast	16 dpf	Epiblast	E7
CCTCTGAGTACATGTC	EPI-like	Replicate 1	postL-EPI	16 dpf	Epiblast	E7.25
CCTCTGAGTCATGCCG	Ectoderm	Replicate 1	EXMC	17 dpf	Mesenchyme	E7.5
CCTCTGAGTCATTAGC	Ectoderm	Replicate 1	postL-EPI	17 dpf	Rostral neurectoderm	E7.5
CCTCTGATCCTCGCAT	ExE-like	Replicate 1	TE and derivatives	14 dpf	ExE ectoderm	E6.5
CCTTACGAGCGTGAGT	Mesoderm-2	Replicate 1	EXMC	12 dpf	Nascent mesoderm	E7.5
CCTTACGAGTAGCCGA	Mesoderm-2	Replicate 1	L-Gast2	16 dpf	Nascent mesoderm	E7
CCTTACGTCTAACTGG	Endoderm	Replicate 1	EXMC	14 dpf	Rostral neurectoderm	E7.5
CCTTCCCCAGCTGTGC	EPI-like	Replicate 1	postE-EPI	14 dpf	Epiblast	E7
CCTTCCCGTTACGCGC	Ectoderm	Replicate 1	EXMC	17 dpf	Mesenchyme	E7.5
CCTTCCCGTTACGGAG	Ectoderm	Replicate 1	EXMC	17 dpf	Mesenchyme	E7.5
CCTTCCCTCCGCGTTT	ExE-like	Replicate 1	TE and derivatives	12 dpf	ExE ectoderm	E7.25
CCTTCCCTCGAACTGT	hPGCLC	Replicate 1	E-PGC	16 dpf	Epiblast	E6.5
CCTTCGACAACCGCCA	EPI-like	Replicate 1	postL-EPI	16 dpf	Epiblast	E7
CCTTCGAGTCACCTAA	EPI-like	Replicate 1	postE-EPI	14 dpf	Epiblast	E7
CCTTCGAGTTACCGAT	EPI-like	Replicate 1	postE-EPI	14 dpf	Epiblast	E7
CCTTCGATCTCGCATC	Mesoderm-2	Replicate 1	L-Gast2	16 dpf	Rostral neurectoderm	E7.5
CCTTTCTAGTACTTGC	Mesoderm-2	Replicate 1	VE/YE	16 dpf	Anterior Primitive Streak	E7
CCTTTCTGTCATATCG	EPI-like	Replicate 1	postE-EPI	16 dpf	Epiblast	E7
CCTTTCTTCACCTTAT	hPGCLC	Replicate 1	E-PGC	16 dpf	Epiblast	E7
CCTTTCTTCGCAAGCC	EPI-like	Replicate 1	postE-EPI	14 dpf	ExE ectoderm	E7.5
CGAACATAGCACGCCT	Mesoderm-2	Replicate 1	EXMC	16 dpf	Anterior Primitive Streak	E7
CGAACATAGCGTTCCG	ExE-like	Replicate 1	TE and derivatives	12 dpf	ExE ectoderm	E7.5
CGAACATCAAGCTGGA	Ectoderm	Replicate 1	postL-EPI	17 dpf	Epiblast	E7.5
CGAACATCATAGGATA	Mesoderm-2	Replicate 1	EXMC	16 dpf	Nascent mesoderm	E7
CGAACATGTCGTGGCT	hPGCLC	Replicate 1	E-PGC	16 dpf	ExE ectoderm	E6.5
CGAACATGTTCTGTTT	EPI-like	Replicate 1	postL-EPI	16 dpf	Epiblast	E7
CGAACATTCCTCTAGC	Ectoderm	Replicate 1	postL-EPI	16 dpf	Rostral neurectoderm	E7.5
CGAACATTCGAGAGCA	EPI-like	Replicate 1	postE-EPI	14 dpf	Epiblast	E7.25
CGAACATTCGCCTGTT	Mesoderm-2	Replicate 1	VE/YE	16 dpf	Anterior Primitive Streak	E7
CGAACATTCTGTCAAG	EPI-like	Replicate 1	postE-EPI	14 dpf	ExE ectoderm	E7
CGAATGTAGAACTCGG	Mesoderm-2	Replicate 1	EXMC	12 dpf	Nascent mesoderm	E7
CGAATGTAGAGTCTGG	EPI-like	Replicate 1	postE-EPI	16 dpf	Epiblast	E7.25
CGAATGTCACAGGAGT	hPGCLC	Replicate 1	E-PGC	16 dpf	Epiblast	E6.5
CGACCTTCAGCTTCGG	EPI-like	Replicate 1	postL-EPI	16 dpf	Epiblast	E7
CGACCTTCATGGGACA	hPGCLC	Replicate 1	E-PGC	16 dpf	Epiblast	E6.5
CGACCTTGTTCTGAAC	EPI-like	Replicate 1	postL-EPI	16 dpf	Epiblast	E7
CGACCTTTCCAATGGT	EPI-like	Replicate 1	postE-EPI	14 dpf	Epiblast	E7.25
CGACTTCCAAGGGTCA	EPI-like	Replicate 1	postE-EPI	14 dpf	Epiblast	E7.25
CGACTTCCAGATGGCA	ExE-like	Replicate 1	TE and derivatives	12 dpf	ExE ectoderm	E7.5
CGACTTCCATCGGTTA	Ectoderm	Replicate 1	postL-EPI	17 dpf	Rostral neurectoderm	E7.5
CGACTTCGTTATCGGT	Mesoderm-1	Replicate 1	postL-EPI	16 dpf	Epiblast	E7.25
CGACTTCTCAGATAAG	ExE-like	Replicate 1	L-AM2	16 dpf	ExE ectoderm	E7
CGACTTCTCCTTTCTC	ExE-like	Replicate 1	L-AM2	16 dpf	Mesenchyme	E7.5
CGAGAAGGTTCAACCA	Ectoderm	Replicate 1	postE-EPI	16 dpf	Rostral neurectoderm	E7.5
CGAGAAGTCAAAGACA	Mesoderm-1	Replicate 1	postE-EPI	14 dpf	Primitive Streak	E7
CGAGCACAGACTAAGT	hPGCLC	Replicate 1	E-PGC	16 dpf	Epiblast	E6.5
CGAGCACAGATGTGGC	hPGCLC	Replicate 1	E-Gast	14 dpf	Epiblast	E7
CGAGCACAGTGCAAGC	Mesoderm-2	Replicate 1	VE/YE	16 dpf	Anterior Primitive Streak	E7.25
CGAGCACCAGGCTGAA	Mesoderm-1	Replicate 1	postE-EPI	14 dpf	Primitive Streak	E7.25
CGAGCACCAGGTCCAC	Mesoderm-1	Replicate 1	L-Gast1	16 dpf	Primitive Streak	E7.25
CGAGCACCATGGGACA	Endoderm	Replicate 1	VE/YE	16 dpf	ExE endoderm	E7.5
CGAGCACGTCTAAACC	EPI-like	Replicate 1	postE-EPI	14 dpf	Epiblast	E7
CGAGCACTCATAGCAC	Mesoderm-2	Replicate 1	EXMC	12 dpf	Nascent mesoderm	E7
CGAGCCAAGACTCGGA	Mesoderm-2	Replicate 1	EXMC	12 dpf	Nascent mesoderm	E7.25
CGAGCCACAGGATCGA	Mesoderm-1	Replicate 1	postE-EPI	16 dpf	Epiblast	E7.25
CGAGCCAGTGCTGTAT	hPGCLC	Replicate 1	E-PGC	16 dpf	Epiblast	E6.5
CGATCGGCAGTCGATT	ExE-like	Replicate 1	L-AM2	16 dpf	ExE ectoderm	E7
CGATCGGGTACAAGTA	Mesoderm-2	Replicate 1	EXMC	12 dpf	Nascent mesoderm	E7
CGATCGGGTACGCTGC	Mesoderm-1	Replicate 1	L-Gast1	16 dpf	Anterior Primitive Streak	E7.25
CGATCGGGTCTCTTTA	Endoderm	Replicate 1	VE/YE	16 dpf	Gut	E7.5
CGATCGGGTGGTCTCG	Mesoderm-1	Replicate 1	postE-EPI	14 dpf	Primitive Streak	E7
CGATGGCCAGGATCGA	EPI-like	Replicate 1	postL-EPI	16 dpf	Epiblast	E7.5
CGATGGCGTAGCTAAA	hPGCLC	Replicate 1	E-PGC	16 dpf	Epiblast	E7.25
CGATGGCGTTCCGGCA	Mesoderm-2	Replicate 1	L-Gast2	12 dpf	Mixed mesoderm	E7.5
CGATGGCTCCTAGTGA	EPI-like	Replicate 1	postE-EPI	14 dpf	Epiblast	E7
CGATGTATCGTTACGA	ExE-like	Replicate 1	E-AM	12 dpf	ExE ectoderm	E7
CGATTGACACCCATTC	EPI-like	Replicate 1	postE-EPI	16 dpf	Epiblast	E7.25
CGATTGATCTGTTTGT	hPGCLC	Replicate 1	E-PGC	16 dpf	Epiblast	E6.5
CGCCAAGAGACGACGT	EPI-like	Replicate 1	postE-EPI	16 dpf	Epiblast	E7
CGCCAAGAGGTGTGGT	hPGCLC	Replicate 1	E-PGC	16 dpf	ExE ectoderm	E7.5
CGCGGTACAATCCAAC	EPI-like	Replicate 1	postE-EPI	16 dpf	Epiblast	E7
CGCGGTACACCCATTC	Mesoderm-2	Replicate 1	EXMC	12 dpf	Nascent mesoderm	E7
CGCGGTATCAGGCAAG	hPGCLC	Replicate 1	E-AM	16 dpf	Epiblast	E6.5
CGCGGTATCCTCAACC	Mesoderm-1	Replicate 1	postE-EPI	16 dpf	ExE endoderm	E7
CGCGTTTCACCAGCAC	Mesoderm-2	Replicate 1	EXMC	16 dpf	Nascent mesoderm	E7.5
CGCGTTTCATTTCAGG	EPI-like	Replicate 1	postL-EPI	16 dpf	Epiblast	E7
CGCGTTTTCCCAAGAT	Endoderm	Replicate 1	VE/YE	16 dpf	ExE endoderm	E7.25
CGCTATCAGCCAGTTT	ExE-like	Replicate 1	L-AM2	16 dpf	ExE ectoderm	E7.25
CGCTATCCACCTCGTT	ExE-like	Replicate 1	TE and derivatives	14 dpf	ExE ectoderm	E7.5
CGCTATCGTTGCCTCT	EPI-like	Replicate 1	postE-EPI	14 dpf	Epiblast	E7
CGCTATCTCGCACTCT	Mesoderm-1	Replicate 1	L-Gast1	16 dpf	Primitive Streak	E7
CGCTGGACATTAGCCA	Endoderm	Replicate 1	EXMC	14 dpf	Primitive Streak	E7
CGCTGGAGTTAAGAAC	Mesoderm-2	Replicate 1	L-Gast2	16 dpf	Nascent mesoderm	E7
CGCTGGATCACTCCTG	Mesoderm-1	Replicate 1	L-Gast1	16 dpf	Primitive Streak	E7.25
CGCTGGATCCGATATG	ExE-like	Replicate 1	TE and derivatives	12 dpf	ExE endoderm	E7
CGCTGGATCGGTTCGG	EPI-like	Replicate 1	postE-EPI	16 dpf	Epiblast	E7.5
CGCTGGATCTTGAGGT	Ectoderm	Replicate 1	postL-EPI	17 dpf	Rostral neurectoderm	E7.5
CGCTTCAAGGAGTACC	Mesoderm-2	Replicate 1	EXMC	12 dpf	Nascent mesoderm	E7.25
CGCTTCACAGGAATGC	Mesoderm-1	Replicate 1	E-AM	16 dpf	ExE endoderm	E7.25
CGCTTCAGTGACGGTA	Mesoderm-2	Replicate 1	L-Gast1	16 dpf	Anterior Primitive Streak	E7.25
CGCTTCAGTTCCTCCA	ExE-like	Replicate 1	E-AM	12 dpf	ExE endoderm	E7
CGCTTCATCACAACGT	Mesoderm-1	Replicate 1	L-Gast2	16 dpf	Nascent mesoderm	E7
CGGACACGTGTTTGTG	Mesoderm-1	Replicate 1	postE-EPI	16 dpf	Epiblast	E7
CGGACACTCTAACGGT	ExE-like	Replicate 1	L-AM2	16 dpf	ExE ectoderm	E7.25
CGGACACTCTCCAGGG	Mesoderm-1	Replicate 1	L-Gast1	16 dpf	Primitive Streak	E7
CGGACGTAGCTTCGCG	Mesoderm-1	Replicate 1	VE/YE	16 dpf	Nascent mesoderm	E7.25
CGGACGTGTCCCTACT	Mesoderm-1	Replicate 1	L-Gast1	16 dpf	Primitive Streak	E7
CGGACGTTCTGGAGCC	EPI-like	Replicate 1	postE-EPI	16 dpf	Epiblast	E7
CGGACTGCACGTCTCT	EPI-like	Replicate 1	postE-EPI	14 dpf	Epiblast	E7.25
CGGACTGCAGACTCGC	Mesoderm-1	Replicate 1	L-Gast1	16 dpf	Nascent mesoderm	E7
CGGACTGGTACTCGCG	Mesoderm-1	Replicate 1	postL-EPI	16 dpf	Primitive Streak	E7
CGGAGCTCACAGGCCT	ExE-like	Replicate 1	L-AM2	16 dpf	ExE ectoderm	E7.5
CGGAGCTGTTACCGAT	Endoderm	Replicate 1	EXMC	16 dpf	Epiblast	E6.5
CGGAGCTTCGAACTGT	Mesoderm-2	Replicate 1	L-Gast1	16 dpf	Nascent mesoderm	E7
CGGAGTCAGGGCACTA	EPI-like	Replicate 1	postL-EPI	16 dpf	Epiblast	E7
CGGAGTCCATGCTAGT	ExE-like	Replicate 1	E-Gast	14 dpf	ExE ectoderm	E7.5
CGGAGTCCATTGGCGC	EPI-like	Replicate 1	postE-EPI	16 dpf	Epiblast	E7.5
CGGAGTCGTAGGACAC	hPGCLC	Replicate 1	E-PGC	16 dpf	ExE ectoderm	E7.5
CGGAGTCTCAGGCCCA	Endoderm	Replicate 1	E-Gast	16 dpf	Anterior Primitive Streak	E7.5
CGGAGTCTCATCTGTT	Mesoderm-2	Replicate 1	EXMC	11 dpf	Mixed mesoderm	E7.25
CGGCTAGAGAACTGTA	hPGCLC	Replicate 1	EXMC	16 dpf	Epiblast	E7.25
CGGCTAGAGGCATGTG	Ectoderm	Replicate 1	postL-EPI	17 dpf	Epiblast	E7.5
CGGCTAGCATGTAAGA	Ectoderm	Replicate 1	postL-EPI	17 dpf	Rostral neurectoderm	E7.5
CGGCTAGGTGGTAACG	Endoderm	Replicate 1	EXMC	16 dpf	Epiblast	E7
CGGGTCAAGGCTCAGA	EPI-like	Replicate 1	postE-EPI	16 dpf	Epiblast	E6.5
CGGGTCACAATGGTCT	EPI-like	Replicate 1	postE-EPI	14 dpf	Primitive Streak	E7
CGGGTCAGTCCAGTTA	Ectoderm	Replicate 1	postL-EPI	16 dpf	Primitive Streak	E7
CGGTTAACATACGCTA	Mesoderm-1	Replicate 1	L-Gast1	16 dpf	Nascent mesoderm	E7
CGGTTAAGTAGGAGTC	Mesoderm-1	Replicate 1	L-Gast1	16 dpf	Anterior Primitive Streak	E7
CGGTTAAGTGAGTATA	hPGCLC	Replicate 1	E-PGC	16 dpf	Epiblast	E6.5
CGTAGCGAGGCCCGTT	Mesoderm-1	Replicate 1	postE-EPI	12 dpf	Epiblast	E7
CGTAGCGCAGCTGTGC	hPGCLC	Replicate 1	E-PGC	16 dpf	Epiblast	E6.5
CGTAGGCGTGTGACGA	Mesoderm-2	Replicate 1	L-Gast2	16 dpf	Nascent mesoderm	E7.25
CGTAGGCTCTGGGCCA	hPGCLC	Replicate 1	E-Gast	14 dpf	Epiblast	E7
CGTCACTAGGACGAAA	Mesoderm-1	Replicate 1	postE-EPI	14 dpf	Epiblast	E6.5
CGTCACTCATCAGTAC	Mesoderm-2	Replicate 1	L-Gast2	16 dpf	Anterior Primitive Streak	E7
CGTCACTCATTGCGGC	Mesoderm-2	Replicate 1	VE/YE	16 dpf	Anterior Primitive Streak	E7.25
CGTCACTTCCTTGGTC	Mesoderm-2	Replicate 1	EXMC	12 dpf	Nascent mesoderm	E7.25
CGTCAGGAGTCTCAAC	Ectoderm	Replicate 1	postL-EPI	17 dpf	ExE ectoderm	E7.5
CGTCAGGCAGTATGCT	Mesoderm-2	Replicate 1	EXMC	12 dpf	Nascent mesoderm	E7
CGTCAGGCAGTCACTA	Mesoderm-2	Replicate 1	L-Gast1	16 dpf	Anterior Primitive Streak	E7
CGTCAGGGTACCGAGA	EPI-like	Replicate 1	postL-EPI	16 dpf	Epiblast	E7.25
CGTCCATAGTGGGTTG	hPGCLC	Replicate 1	E-PGC	16 dpf	ExE ectoderm	E7.5
CGTCCATCACCTATCC	Mesoderm-2	Replicate 1	EXMC	12 dpf	Nascent mesoderm	E7
CGTCCATGTACATGTC	hPGCLC	Replicate 1	E-PGC	16 dpf	Epiblast	E6.5
CGTCCATTCGGCGGTT	Ectoderm	Replicate 1	postL-EPI	17 dpf	Rostral neurectoderm	E7.5
CGTCTACAGGTTACCT	Endoderm	Replicate 1	VE/YE	16 dpf	Primitive Streak	E7.5
CGTCTACCAGTGGAGT	Ectoderm	Replicate 1	postL-EPI	17 dpf	Rostral neurectoderm	E7.5
CGTCTACGTGATGTCT	EPI-like	Replicate 1	postE-EPI	14 dpf	Epiblast	E7
CGTGAGCCAGCCAGAA	Ectoderm	Replicate 1	postL-EPI	17 dpf	Rostral neurectoderm	E7.5
CGTGAGCGTGTTTGGT	Mesoderm-1	Replicate 1	E-Gast	14 dpf	Intermediate mesoderm	E7.5
CGTGTAAAGAGGTACC	EPI-like	Replicate 1	postL-EPI	16 dpf	Epiblast	E7.25
CGTGTAAAGCAGACTG	EPI-like	Replicate 1	postL-EPI	16 dpf	Epiblast	E7
CGTGTAACAGTCGTGC	ExE-like	Replicate 1	TE and derivatives	12 dpf	ExE endoderm	E7
CGTGTAACATGCAACT	ExE-like	Replicate 1	L-AM2	16 dpf	ExE ectoderm	E7.5
CGTGTAAGTAGAGCTG	hPGCLC	Replicate 1	E-PGC	16 dpf	Epiblast	E7.25
CGTGTAAGTTCTGTTT	ExE-like	Replicate 1	E-AM	12 dpf	ExE ectoderm	E7
CGTGTCTAGCTGCAAG	Mesoderm-2	Replicate 1	EXMC	12 dpf	Nascent mesoderm	E7
CGTGTCTAGGGATCTG	EPI-like	Replicate 1	postE-EPI	16 dpf	ExE ectoderm	E7.5
CGTGTCTCACAGGTTT	hPGCLC	Replicate 1	E-PGC	16 dpf	Epiblast	E6.5
CGTTAGAAGAGGTAGA	Mesoderm-2	Replicate 1	EXMC	12 dpf	Nascent mesoderm	E7
CGTTAGATCCAAAGTC	Mesoderm-1	Replicate 1	postE-EPI	16 dpf	Epiblast	E7
CGTTAGATCCTGTAGA	Mesoderm-2	Replicate 1	VE/YE	16 dpf	Anterior Primitive Streak	E7
CGTTCTGAGAAACCAT	Mesoderm-2	Replicate 1	EXMC	12 dpf	Nascent mesoderm	E7
CGTTCTGAGCTCAACT	EPI-like	Replicate 1	postL-EPI	16 dpf	Primitive Streak	E7
CGTTCTGAGGCGACAT	EPI-like	Replicate 1	postL-EPI	16 dpf	Epiblast	E7.25
CGTTCTGCACGACGAA	ExE-like	Replicate 1	TE and derivatives	12 dpf	ExE endoderm	E7.25
CGTTCTGCAGCTGTAT	EPI-like	Replicate 1	postE-EPI	14 dpf	Epiblast	E7
CGTTGGGAGGTAAACT	EPI-like	Replicate 1	postE-EPI	16 dpf	Epiblast	E7
CGTTGGGAGTGCAAGC	Mesoderm-1	Replicate 1	L-Gast1	16 dpf	Epiblast	E7.25
CGTTGGGCAAGTAGTA	Ectoderm	Replicate 1	EXMC	17 dpf	Mixed mesoderm	E7
CGTTGGGCAATGGAGC	Ectoderm	Replicate 1	postL-EPI	17 dpf	Rostral neurectoderm	E7.5
CTAACTTAGCTGCGAA	Mesoderm-1	Replicate 1	postE-EPI	14 dpf	Primitive Streak	E7.25
CTAACTTCATGGGACA	Ectoderm	Replicate 1	postL-EPI	17 dpf	Rostral neurectoderm	E7.5
CTAACTTGTGCACCAC	hPGCLC	Replicate 1	E-PGC	16 dpf	ExE endoderm	E7.5
CTAACTTTCTGACCTC	hPGCLC	Replicate 1	E-PGC	16 dpf	Epiblast	E6.5
CTAAGACCAAAGTCAA	Mesoderm-2	Replicate 1	EXMC	12 dpf	Nascent mesoderm	E7
CTAAGACCAGGCAGTA	Mesoderm-2	Replicate 1	EXMC	16 dpf	Nascent mesoderm	E7.25
CTAAGACCATCAGTAC	ExE-like	Replicate 1	TE and derivatives	12 dpf	ExE ectoderm	E7
CTAAGACGTGCAACGA	Mesoderm-2	Replicate 1	EXMC	12 dpf	Nascent mesoderm	E7
CTAATGGTCCCTGACT	EPI-like	Replicate 1	postE-EPI	14 dpf	Epiblast	E6.5
CTAATGGTCCGCGCAA	Mesoderm-2	Replicate 1	L-Gast1	16 dpf	Anterior Primitive Streak	E7.25
CTACACCCACACGCTG	Mesoderm-1	Replicate 1	postL-EPI	17 dpf	Rostral neurectoderm	E7.5
CTACATTAGTGTTTGC	hPGCLC	Replicate 1	E-PGC	16 dpf	Epiblast	E7.25
CTACATTGTGGGTATG	EPI-like	Replicate 1	postE-EPI	14 dpf	Epiblast	E7
CTACATTTCCTTGACC	Mesoderm-2	Replicate 1	L-Gast2	16 dpf	Nascent mesoderm	E7.5
CTACCCAAGCTAGTCT	Ectoderm	Replicate 1	EXMC	17 dpf	ExE mesoderm	E7.5
CTACCCAGTTAAAGAC	Mesoderm-2	Replicate 1	EXMC	12 dpf	Nascent mesoderm	E7.25
CTACCCAGTTTGACTG	Mesoderm-2	Replicate 1	EXMC	12 dpf	Nascent mesoderm	E7
CTACCCATCCTAGGGC	Mesoderm-1	Replicate 1	L-Gast1	16 dpf	Primitive Streak	E7
CTACCCATCTTGTATC	EPI-like	Replicate 1	postE-EPI	14 dpf	Epiblast	E7
CTACGTCCATTGAGCT	Mesoderm-2	Replicate 1	VE/YE	16 dpf	Anterior Primitive Streak	E7
CTAGAGTAGATATGCA	hPGCLC	Replicate 1	E-PGC	16 dpf	Primitive Streak	E7.25
CTAGAGTAGGGATGGG	Mesoderm-2	Replicate 1	EXMC	12 dpf	Nascent mesoderm	E7.25
CTAGAGTCAAACGCGA	Mesoderm-2	Replicate 1	EXMC	12 dpf	Nascent mesoderm	E7.25
CTAGAGTCAGCGTAAG	hPGCLC	Replicate 1	E-PGC	16 dpf	ExE ectoderm	E7
CTAGAGTTCTCCAACC	Mesoderm-1	Replicate 1	L-Gast1	16 dpf	Primitive Streak	E7.5
CTAGCCTAGCTCCTCT	Ectoderm	Replicate 1	postL-EPI	16 dpf	Rostral neurectoderm	E7.5
CTAGCCTCAAGCGAGT	Mesoderm-1	Replicate 1	postE-EPI	14 dpf	Epiblast	E7
CTAGCCTCACATAACC	Mesoderm-2	Replicate 1	L-Gast2	16 dpf	Nascent mesoderm	E7.25
CTAGCCTCAGTACACT	EPI-like	Replicate 1	postE-EPI	14 dpf	Epiblast	E7.5
CTAGCCTGTAGCGCAA	Mesoderm-2	Replicate 1	VE/YE	16 dpf	Anterior Primitive Streak	E7
CTAGCCTGTGACGCCT	Mesoderm-2	Replicate 1	L-Gast2	16 dpf	Nascent mesoderm	E7
CTAGCCTTCGAGAGCA	Mesoderm-1	Replicate 1	postE-EPI	16 dpf	Epiblast	E7.25
CTAGTGAAGACTACAA	Mesoderm-1	Replicate 1	E-Gast	12 dpf	Primitive Streak	E7.25
CTAGTGACACATCCAA	EPI-like	Replicate 1	postE-EPI	14 dpf	Epiblast	E7
CTAGTGATCAGGCCCA	EPI-like	Replicate 1	postE-EPI	14 dpf	Epiblast	E7
CTCAGAAAGATACACA	Mesoderm-2	Replicate 1	EXMC	12 dpf	Nascent mesoderm	E7.5
CTCAGAAAGCGTGAAC	Mesoderm-2	Replicate 1	EXMC	12 dpf	Mixed mesoderm	E7.25
CTCAGAAAGCTAGTGG	ExE-like	Replicate 1	L-AM2	16 dpf	ExE endoderm	E7
CTCAGAAAGTGTCCAT	Mesoderm-1	Replicate 1	postE-EPI	16 dpf	Primitive Streak	E7
CTCAGAACAACTGCGC	Ectoderm	Replicate 1	EXMC	17 dpf	Mesenchyme	E7.5
CTCAGAAGTCCGCTGA	EPI-like	Replicate 1	postE-EPI	14 dpf	Epiblast	E7
CTCAGAATCGCGCCAA	Ectoderm	Replicate 1	postL-EPI	17 dpf	Epiblast	E7
CTCATTAAGAGCTTCT	EPI-like	Replicate 1	postE-EPI	14 dpf	Epiblast	E7
CTCATTATCCATTCTA	EPI-like	Replicate 1	postE-EPI	16 dpf	Epiblast	E7
CTCATTATCTGTCTCG	Mesoderm-2	Replicate 1	EXMC	16 dpf	Nascent mesoderm	E7.25
CTCCTAGAGTTAAGTG	Mesoderm-2	Replicate 1	EXMC	12 dpf	Nascent mesoderm	E7.25
CTCCTAGGTTAGATGA	Mesoderm-1	Replicate 1	L-Gast1	16 dpf	Nascent mesoderm	E7
CTCGAAAAGTAGATGT	Mesoderm-2	Replicate 1	EXMC	12 dpf	Nascent mesoderm	E7.5
CTCGAAAGTAAGTAGT	ExE-like	Replicate 1	TE and derivatives	12 dpf	ExE ectoderm	E6.75
CTCGAAATCAGTCAGT	EPI-like	Replicate 1	postL-EPI	16 dpf	Epiblast	E7
CTCGAGGAGAAGCCCA	Mesoderm-2	Replicate 1	EXMC	12 dpf	Nascent mesoderm	E7
CTCGAGGAGGTGCTAG	EPI-like	Replicate 1	postL-EPI	16 dpf	Epiblast	E7
CTCGAGGTCACCAGGC	hPGCLC	Replicate 1	E-PGC	16 dpf	Epiblast	E7
CTCGGAGCAAGTTGTC	EPI-like	Replicate 1	postL-EPI	16 dpf	Epiblast	E7
CTCGGAGGTACCAGTT	Ectoderm	Replicate 1	postL-EPI	17 dpf	Epiblast	E6.5
CTCGGAGTCACCCGAG	Mesoderm-1	Replicate 1	L-Gast1	16 dpf	Nascent mesoderm	E7
CTCGGAGTCGGCGCTA	Endoderm	Replicate 1	EXMC	11 dpf	ExE endoderm	E7.5
CTCGGAGTCTGAGGGA	Mesoderm-2	Replicate 1	EXMC	11 dpf	Mixed mesoderm	E7.25
CTCGGGATCAAGCCTA	EPI-like	Replicate 1	postL-EPI	16 dpf	Epiblast	E7
CTCGGGATCACTCTTA	Mesoderm-2	Replicate 1	EXMC	12 dpf	Nascent mesoderm	E7.5
CTCGTACAGGATGCGT	ExE-like	Replicate 1	TE and derivatives	12 dpf	ExE ectoderm	E7.5
CTCGTACCACATGGGA	Mesoderm-1	Replicate 1	postE-EPI	12 dpf	Gut	E7.5
CTCGTACGTCATACTG	EPI-like	Replicate 1	postE-EPI	14 dpf	Epiblast	E6.5
CTCGTACTCCTAGAAC	EPI-like	Replicate 1	postE-EPI	14 dpf	Epiblast	E7
CTCGTCACAAGCCTAT	Ectoderm	Replicate 1	postL-EPI	16 dpf	Epiblast	E7
CTCGTCACACGGTTTA	Mesoderm-1	Replicate 1	postE-EPI	16 dpf	Primitive Streak	E7
CTCTAATAGAATGTTG	hPGCLC	Replicate 1	E-PGC	16 dpf	Epiblast	E7.5
CTCTAATCAAATTGCC	Mesoderm-1	Replicate 1	L-Gast1	16 dpf	Anterior Primitive Streak	E7
CTCTAATGTCTTGTCC	Mesoderm-2	Replicate 1	EXMC	12 dpf	Nascent mesoderm	E7
CTCTACGAGCTCCCAG	EPI-like	Replicate 1	postE-EPI	14 dpf	Epiblast	E7
CTCTACGAGGCAGGTT	EPI-like	Replicate 1	postL-EPI	16 dpf	Epiblast	E7.25
CTCTACGCAAGCGAGT	ExE-like	Replicate 1	TE and derivatives	14 dpf	ExE ectoderm	E7.5
CTCTACGGTGTCCTCT	Ectoderm	Replicate 1	postL-EPI	17 dpf	Rostral neurectoderm	E7.5
CTCTACGTCAATCTCT	Endoderm	Replicate 1	EXMC	14 dpf	Mixed mesoderm	E7
CTCTACGTCAGAGGTG	ExE-like	Replicate 1	L-AM2	16 dpf	ExE ectoderm	E7.5
CTCTACGTCTTGCAAG	ExE-like	Replicate 1	TE and derivatives	12 dpf	ExE ectoderm	E7
CTCTGGTAGGAGTACC	Ectoderm	Replicate 1	postL-EPI	17 dpf	Epiblast	E7.25
CTCTGGTCAAGCTGGA	Mesoderm-2	Replicate 1	VE/YE	16 dpf	Nascent mesoderm	E7
CTCTGGTCACCACGTG	Mesoderm-1	Replicate 1	L-Gast1	16 dpf	Primitive Streak	E7.25
CTCTGGTCACTTACGA	EPI-like	Replicate 1	postE-EPI	14 dpf	Epiblast	E7
CTCTGGTGTACAGTTC	Ectoderm	Replicate 1	postL-EPI	17 dpf	Rostral neurectoderm	E7.5
CTCTGGTGTTTGGGCC	ExE-like	Replicate 1	E-AM	12 dpf	ExE ectoderm	E7
CTGAAACCAGTTCCCT	EPI-like	Replicate 1	postE-EPI	14 dpf	Epiblast	E7
CTGAAACGTACTCGCG	ExE-like	Replicate 1	E-Gast	14 dpf	ExE ectoderm	E7.5
CTGAAACTCGCAAGCC	Mesoderm-1	Replicate 1	E-AM	12 dpf	Visceral endoderm	E7.5
CTGAAGTAGCTGCGAA	Mesoderm-1	Replicate 1	L-Gast1	16 dpf	Caudal epiblast	E7.5
CTGAAGTCACTTACGA	Mesoderm-1	Replicate 1	postE-EPI	14 dpf	Anterior Primitive Streak	E7
CTGAAGTGTCGCTTTC	EPI-like	Replicate 1	postE-EPI	14 dpf	Epiblast	E7
CTGAAGTGTTCAGGCC	EPI-like	Replicate 1	postE-EPI	14 dpf	Epiblast	E7
CTGATAGCAGTGAGTG	Ectoderm	Replicate 1	postL-EPI	17 dpf	Epiblast	E7
CTGATAGCAGTTCCCT	Mesoderm-1	Replicate 1	E-AM	12 dpf	Epiblast	E6.5
CTGATAGCATCGGACC	Mesoderm-1	Replicate 1	postL-EPI	16 dpf	Primitive Streak	E7
CTGATAGGTTAAGGGC	EPI-like	Replicate 1	L-Gast1	16 dpf	Epiblast	E6.5
CTGATAGTCATGCAAC	Mesoderm-2	Replicate 1	L-Gast2	16 dpf	Nascent mesoderm	E7.25
CTGATAGTCCATTCTA	EPI-like	Replicate 1	postE-EPI	14 dpf	Epiblast	E6.5
CTGATCCAGGTACTCT	ExE-like	Replicate 1	TE and derivatives	14 dpf	ExE ectoderm	E7.5
CTGATCCAGGTGACCA	Mesoderm-2	Replicate 1	EXMC	12 dpf	Nascent mesoderm	E7
CTGATCCCAGCCAGAA	hPGCLC	Replicate 1	E-PGC	16 dpf	ExE ectoderm	E7.5
CTGCCTAAGGCTACGA	Mesoderm-2	Replicate 1	VE/YE	16 dpf	Anterior Primitive Streak	E7
CTGCGGAAGACTGGGT	ExE-like	Replicate 1	L-AM2	16 dpf	ExE ectoderm	E7.25
CTGCGGAAGCCCAACC	EPI-like	Replicate 1	postE-EPI	16 dpf	Epiblast	E7.5
CTGCGGACAATGTAAG	hPGCLC	Replicate 1	E-PGC	16 dpf	Epiblast	E7.25
CTGCGGACAGTCGATT	hPGCLC	Replicate 1	E-PGC	16 dpf	ExE endoderm	E7
CTGCGGACATACTACG	ExE-like	Replicate 1	L-AM2	16 dpf	ExE ectoderm	E7
CTGCGGATCAGCTTAG	hPGCLC	Replicate 1	E-PGC	16 dpf	ExE ectoderm	E7.5
CTGCTGTAGACGCAAC	EPI-like	Replicate 1	postL-EPI	16 dpf	Epiblast	E7
CTGCTGTCAACTGGCC	Endoderm	Replicate 1	L-Gast1	16 dpf	Def. endoderm	E7.25
CTGCTGTCACGGTAGA	Mesoderm-2	Replicate 1	L-Gast2	16 dpf	Nascent mesoderm	E7.25
CTGCTGTTCAATAAGG	Mesoderm-2	Replicate 1	EXMC	12 dpf	Nascent mesoderm	E7.5
CTGCTGTTCAGTCAGT	Mesoderm-2	Replicate 1	L-Gast2	16 dpf	Nascent mesoderm	E7.25
CTGCTGTTCCAACCAA	Mesoderm-1	Replicate 1	L-Gast1	16 dpf	Primitive Streak	E7
CTGCTGTTCGGGAGTA	Mesoderm-2	Replicate 1	L-Gast1	16 dpf	Primitive Streak	E7.25
CTGTGCTGTTGGTGGA	ExE-like	Replicate 1	L-AM2	16 dpf	ExE ectoderm	E7.5
CTGTGCTTCCAAGCCG	Mesoderm-2	Replicate 1	EXMC	16 dpf	Nascent mesoderm	E7
CTGTTTAGTGGGTCAA	EPI-like	Replicate 1	postE-EPI	14 dpf	Primitive Streak	E7.25
CTGTTTATCACATGCA	hPGCLC	Replicate 1	E-PGC	16 dpf	ExE endoderm	E7.25
CTTAACTAGGTGACCA	Mesoderm-2	Replicate 1	EXMC	12 dpf	Nascent mesoderm	E7.25
CTTAACTCAATGGTCT	Mesoderm-1	Replicate 1	E-Gast	14 dpf	Epiblast	E7
CTTAACTCAGTGACAG	EPI-like	Replicate 1	postE-EPI	14 dpf	Epiblast	E7.25
CTTAACTGTAGGCTGA	Mesoderm-1	Replicate 1	E-Gast	16 dpf	Caudal epiblast	E7.5
CTTAACTGTTCTGAAC	EPI-like	Replicate 1	postE-EPI	16 dpf	Epiblast	E7
CTTAGGACAGTGGGAT	Mesoderm-1	Replicate 1	postE-EPI	14 dpf	Primitive Streak	E7.25
CTTCTCTAGCCACTAT	EPI-like	Replicate 1	postE-EPI	14 dpf	Epiblast	E7
CTTCTCTCACCAGCAC	hPGCLC	Replicate 1	E-PGC	16 dpf	Epiblast	E7.25
CTTCTCTGTTGGAGGT	Mesoderm-1	Replicate 1	postE-EPI	12 dpf	Epiblast	E6.5
CTTGGCTAGCTAGCCC	ExE-like	Replicate 1	L-AM2	16 dpf	ExE endoderm	E7
CTTTGCGCAGCTCGCA	EPI-like	Replicate 1	postE-EPI	14 dpf	Epiblast	E6.5
CTTTGCGCATACAGCT	EPI-like	Replicate 1	postE-EPI	14 dpf	Epiblast	E7
CTTTGCGGTGTTGGGA	Mesoderm-2	Replicate 1	EXMC	12 dpf	Nascent mesoderm	E7.25
GAAACTCAGACCCACC	Mesoderm-2	Replicate 1	EXMC	12 dpf	Nascent mesoderm	E7.25
GAAACTCAGTGGTCCC	EPI-like	Replicate 1	postE-EPI	14 dpf	Epiblast	E7
GAAACTCCAATTCCTT	EPI-like	Replicate 1	postE-EPI	14 dpf	Epiblast	E7
GAAACTCCACAACTGT	Mesoderm-2	Replicate 1	EXMC	16 dpf	Nascent mesoderm	E7.25
GAAACTCGTACCGTTA	EPI-like	Replicate 1	postL-EPI	16 dpf	Epiblast	E7
GAAACTCGTGGCAAAC	Mesoderm-1	Replicate 1	L-Gast1	16 dpf	Primitive Streak	E7.25
GAAACTCGTTACGTCA	hPGCLC	Replicate 1	postE-EPI	16 dpf	Epiblast	E7
GAAACTCTCTTGCATT	EPI-like	Replicate 1	postE-EPI	14 dpf	Epiblast	E6.5
GAAATGAAGTTCGCAT	Mesoderm-2	Replicate 1	EXMC	12 dpf	Nascent mesoderm	E7.5
GAAATGAGTCTAGCCG	Mesoderm-2	Replicate 1	EXMC	16 dpf	Nascent mesoderm	E7
GAAATGATCCACGCAG	hPGCLC	Replicate 1	E-Gast	16 dpf	Epiblast	E7
GAACATCAGTGAACGC	ExE-like	Replicate 1	E-AM	12 dpf	ExE ectoderm	E6.5
GAACATCCATTTGCCC	Mesoderm-1	Replicate 1	postL-EPI	17 dpf	Anterior Primitive Streak	E7.25
GAACCTACAAAGGTGC	EPI-like	Replicate 1	postL-EPI	16 dpf	Epiblast	E7
GAACCTACATGCCTAA	Ectoderm	Replicate 1	postL-EPI	16 dpf	Epiblast	E7
GAACCTAGTATATGAG	EPI-like	Replicate 1	postL-EPI	16 dpf	Epiblast	E7.25
GAACCTAGTCCAAGTT	Ectoderm	Replicate 1	EXMC	17 dpf	ExE mesoderm	E7.5
GAACCTATCAGTTCGA	ExE-like	Replicate 1	L-AM2	16 dpf	ExE ectoderm	E7.25
GAACCTATCCAAACTG	ExE-like	Replicate 1	L-AM2	16 dpf	Mesenchyme	E7.5
GAACCTATCCATTCTA	hPGCLC	Replicate 1	E-PGC	16 dpf	ExE ectoderm	E7.25
GAACGGAGTGACCAAG	Mesoderm-2	Replicate 1	L-Gast1	16 dpf	Anterior Primitive Streak	E7
GAACGGATCGCATGGC	Mesoderm-1	Replicate 1	postE-EPI	16 dpf	Epiblast	E6.5
GAACGGATCTAACCGA	ExE-like	Replicate 1	postE-EPI	14 dpf	ExE ectoderm	E6.5
GAAGCAGAGAATTGTG	Mesoderm-1	Replicate 1	L-Gast1	16 dpf	Nascent mesoderm	E7
GAAGCAGAGTCCAGGA	Mesoderm-1	Replicate 1	L-Gast1	16 dpf	Anterior Primitive Streak	E7
GAAGCAGGTTACCAGT	Endoderm	Replicate 1	VE/YE	16 dpf	Def. endoderm	E7.5
GAAGCAGTCAGGCGAA	Mesoderm-1	Replicate 1	L-Gast1	16 dpf	Primitive Streak	E7
GAAGCAGTCCACGACG	hPGCLC	Replicate 1	E-PGC	16 dpf	Epiblast	E7.25
GAATGAAAGAAAGTGG	Ectoderm	Replicate 1	postL-EPI	16 dpf	Epiblast	E7
GAATGAAAGCTAGTGG	ExE-like	Replicate 1	TE and derivatives	14 dpf	ExE ectoderm	E7.25
GAATGAAAGCTCTCGG	EPI-like	Replicate 1	postL-EPI	16 dpf	Epiblast	E7
GAATGAAAGGACGAAA	Mesoderm-1	Replicate 1	postE-EPI	16 dpf	Primitive Streak	E7
GAATGAAAGTCAAGCG	ExE-like	Replicate 1	L-AM2	16 dpf	ExE ectoderm	E7.5
GAATGAAGTTCGTCTC	Mesoderm-1	Replicate 1	L-Gast1	16 dpf	Primitive Streak	E7.25
GAATGAATCTCTTATG	ExE-like	Replicate 1	L-AM2	16 dpf	ExE endoderm	E7
GACACGCCAGTTTACG	hPGCLC	Replicate 1	E-Gast	16 dpf	Epiblast	E7.25
GACACGCGTACCGTTA	hPGCLC	Replicate 1	E-PGC	16 dpf	Epiblast	E7
GACACGCTCAGCTCTC	Mesoderm-1	Replicate 1	E-Gast	12 dpf	Epiblast	E7.5
GACAGAGCAAAGGCGT	Ectoderm	Replicate 1	postL-EPI	17 dpf	Rostral neurectoderm	E7.5
GACAGAGCAACTGCGC	Mesoderm-1	Replicate 1	L-Gast1	16 dpf	Nascent mesoderm	E7.25
GACAGAGCACGGATAG	Mesoderm-1	Replicate 1	L-Gast1	16 dpf	Primitive Streak	E7.25
GACAGAGGTCGCATAT	Ectoderm	Replicate 1	EXMC	17 dpf	Mesenchyme	E7.5
GACCAATAGCTGAACG	Mesoderm-1	Replicate 1	postE-EPI	16 dpf	Primitive Streak	E7
GACCTGGCATTAACCG	Ectoderm	Replicate 1	EXMC	17 dpf	ExE endoderm	E7.5
GACCTGGGTCAGAAGC	Endoderm	Replicate 1	VE/YE	16 dpf	Def. endoderm	E7.25
GACCTGGTCACGCATA	EPI-like	Replicate 1	postL-EPI	16 dpf	Rostral neurectoderm	E7.5
GACGCGTCACCGTTGG	ExE-like	Replicate 1	L-AM2	16 dpf	ExE ectoderm	E7.25
GACGCGTTCACTTCAT	EPI-like	Replicate 1	postE-EPI	14 dpf	Epiblast	E7
GACGGCTAGCGTAGTG	Ectoderm	Replicate 1	postL-EPI	17 dpf	Epiblast	E7.25
GACGGCTCAGTGAGTG	EPI-like	Replicate 1	postL-EPI	16 dpf	Epiblast	E7.5
GACGGCTCATGACATC	Endoderm	Replicate 1	EXMC	16 dpf	ExE endoderm	E7.5
GACGGCTGTCGCGGTT	Ectoderm	Replicate 1	postL-EPI	17 dpf	Epiblast	E7.5
GACGGCTTCGCCAGCA	Mesoderm-1	Replicate 1	postE-EPI	16 dpf	Primitive Streak	E7.25
GACGGCTTCTTATCTG	Mesoderm-1	Replicate 1	postL-EPI	16 dpf	Primitive Streak	E7.5
GACGTGCCACAAGACG	Ectoderm	Replicate 1	postL-EPI	17 dpf	Epiblast	E7.5
GACGTGCCACGGTAGA	Mesoderm-1	Replicate 1	L-Gast1	16 dpf	Primitive Streak	E7.25
GACGTGCCACGTAAGG	EPI-like	Replicate 1	postE-EPI	14 dpf	Primitive Streak	E7.25
GACGTGCTCCGCGCAA	hPGCLC	Replicate 1	E-PGC	16 dpf	ExE ectoderm	E7.25
GACGTTAAGAGCAATT	Mesoderm-2	Replicate 1	EXMC	12 dpf	Nascent mesoderm	E7
GACGTTAAGCTCCTCT	Mesoderm-2	Replicate 1	EXMC	16 dpf	Nascent mesoderm	E7
GACGTTAAGTTGCAGG	hPGCLC	Replicate 1	E-PGC	16 dpf	Epiblast	E6.5
GACGTTAGTATCGCAT	Mesoderm-2	Replicate 1	L-Gast2	16 dpf	Anterior Primitive Streak	E7
GACGTTAGTGACGGTA	ExE-like	Replicate 1	TE and derivatives	12 dpf	ExE ectoderm	E7.25
GACGTTATCCGCATCT	EPI-like	Replicate 1	postL-EPI	16 dpf	Epiblast	E7.25
GACTAACAGGAATTAC	Mesoderm-2	Replicate 1	EXMC	12 dpf	Intermediate mesoderm	E7.5
GACTAACAGGAGCGTT	Mesoderm-2	Replicate 1	EXMC	12 dpf	Nascent mesoderm	E7.5
GACTAACCAGCTGTTA	Endoderm	Replicate 1	EXMC	16 dpf	ExE endoderm	E7.5
GACTAACGTCTCTTTA	hPGCLC	Replicate 1	E-PGC	16 dpf	Rostral neurectoderm	E7.5
GACTAACGTGACCAAG	EPI-like	Replicate 1	postE-EPI	14 dpf	Epiblast	E7
GACTAACGTTGGTGGA	EPI-like	Replicate 1	postL-EPI	16 dpf	Epiblast	E6.5
GACTAACTCACTCCTG	Mesoderm-2	Replicate 1	EXMC	16 dpf	Nascent mesoderm	E7
GACTAACTCGGCATCG	EPI-like	Replicate 1	postE-EPI	14 dpf	ExE ectoderm	E7
GACTAACTCGTCCGTT	hPGCLC	Replicate 1	E-PGC	16 dpf	ExE endoderm	E7.5
GACTACAAGGCGACAT	ExE-like	Replicate 1	E-AM	12 dpf	ExE ectoderm	E7.25
GACTACAGTACAGACG	Mesoderm-1	Replicate 1	L-Gast1	16 dpf	Nascent mesoderm	E7.25
GACTACAGTTTCGCTC	EPI-like	Replicate 1	postE-EPI	16 dpf	Epiblast	E7
GAGCAGACAATCAGAA	Mesoderm-1	Replicate 1	E-Gast	14 dpf	Blood progenitors 2	E7.5
GAGCAGATCCGCGCAA	ExE-like	Replicate 1	E-AM	12 dpf	ExE ectoderm	E7
GAGGTGACAAAGTGCG	ExE-like	Replicate 1	E-Gast	14 dpf	ExE ectoderm	E7.5
GAGGTGATCTAACTCT	EPI-like	Replicate 1	postE-EPI	14 dpf	Epiblast	E7
GAGTCCGAGAAGGTGA	Mesoderm-2	Replicate 1	EXMC	12 dpf	Nascent mesoderm	E7.25
GAGTCCGAGTCATGCT	EPI-like	Replicate 1	postE-EPI	16 dpf	Primitive Streak	E7.25
GAGTCCGGTCTCGTTC	Mesoderm-1	Replicate 1	L-Gast1	16 dpf	Primitive Streak	E7
GAGTCCGTCGAGAGCA	EPI-like	Replicate 1	postL-EPI	16 dpf	Epiblast	E7.25
GATCAGTAGAGCTGCA	Ectoderm	Replicate 1	postL-EPI	17 dpf	Epiblast	E7.25
GATCAGTGTTGCCTCT	Mesoderm-1	Replicate 1	postE-EPI	16 dpf	Primitive Streak	E7
GATCGATAGATGTTAG	Mesoderm-1	Replicate 1	E-Gast	14 dpf	Primitive Streak	E7.25
GATCGATCAGGGTTAG	Mesoderm-1	Replicate 1	postL-EPI	16 dpf	Primitive Streak	E7
GATCGATCATCACCCT	Ectoderm	Replicate 1	EXMC	17 dpf	Mesenchyme	E7.5
GATCGATGTAAGAGGA	Mesoderm-2	Replicate 1	EXMC	12 dpf	Nascent mesoderm	E7.25
GATCGCGCATCCGGGT	Ectoderm	Replicate 1	postE-EPI	16 dpf	Rostral neurectoderm	E7.5
GATCGCGCATTAGCCA	EPI-like	Replicate 1	postE-EPI	14 dpf	Primitive Streak	E7.25
GATCGCGGTTTGACTG	EPI-like	Replicate 1	postE-EPI	14 dpf	Epiblast	E7
GATCGTAAGAGGGCTT	Mesoderm-2	Replicate 1	EXMC	11 dpf	Nascent mesoderm	E7.25
GATCGTACAGTCAGCC	EPI-like	Replicate 1	postE-EPI	14 dpf	Primitive Streak	E7
GATCTAGAGGAACTGC	ExE-like	Replicate 1	TE and derivatives	14 dpf	ExE ectoderm	E7.5
GATCTAGAGGCAAAGA	EPI-like	Replicate 1	postE-EPI	16 dpf	Epiblast	E7.25
GATCTAGCACGAGAGT	Mesoderm-2	Replicate 1	VE/YE	16 dpf	Def. endoderm	E7.5
GATCTAGGTGTGGCTC	Mesoderm-1	Replicate 1	postE-EPI	14 dpf	Primitive Streak	E7.25
GATCTAGGTTTGGGCC	EPI-like	Replicate 1	postE-EPI	14 dpf	Epiblast	E7
GATCTAGTCAAGAAGT	EPI-like	Replicate 1	postL-EPI	16 dpf	Epiblast	E7
GATCTAGTCAGCATGT	Mesoderm-2	Replicate 1	EXMC	11 dpf	Nascent mesoderm	E7.25
GATGAAAAGCTGTCTA	Mesoderm-2	Replicate 1	VE/YE	16 dpf	Anterior Primitive Streak	E7
GATGAAAGTTTGACAC	hPGCLC	Replicate 1	E-PGC	16 dpf	Epiblast	E6.5
GATGAAATCACATACG	EPI-like	Replicate 1	postE-EPI	14 dpf	Epiblast	E7
GATGAAATCGTCGTTC	Ectoderm	Replicate 1	postL-EPI	17 dpf	Surface ectoderm	E7.5
GATGAGGAGCTAGTTC	hPGCLC	Replicate 1	E-PGC	16 dpf	Epiblast	E7
GATGAGGCAGCGTCCA	Mesoderm-1	Replicate 1	postL-EPI	16 dpf	ExE ectoderm	E7.5
GATGAGGTCGGCCGAT	Mesoderm-1	Replicate 1	L-Gast1	16 dpf	Anterior Primitive Streak	E7
GATGCTAAGCCACCTG	Endoderm	Replicate 1	L-Gast1	16 dpf	Primitive Streak	E7.25
GATGCTAAGGTAAACT	Mesoderm-2	Replicate 1	L-Gast2	16 dpf	Nascent mesoderm	E7
GATGCTACACACCGCA	Mesoderm-2	Replicate 1	EXMC	11 dpf	Nascent mesoderm	E7
GATGCTAGTCGAGTTT	EPI-like	Replicate 1	postL-EPI	16 dpf	Epiblast	E6.5
GATGCTATCCATTCTA	Mesoderm-2	Replicate 1	EXMC	11 dpf	Mixed mesoderm	E7.25
GATTCAGGTAGAGGAA	Mesoderm-1	Replicate 1	postL-EPI	16 dpf	Epiblast	E7
GATTCAGGTTCAACCA	EPI-like	Replicate 1	postE-EPI	14 dpf	Primitive Streak	E7
GATTCAGTCCACGACG	hPGCLC	Replicate 1	E-PGC	16 dpf	Epiblast	E7
GATTCAGTCTCTGAGA	EPI-like	Replicate 1	postL-EPI	16 dpf	Epiblast	E7.25
GATTCAGTCTGCGACG	ExE-like	Replicate 1	TE and derivatives	14 dpf	ExE ectoderm	E6.5
GCAAACTCATAAAGGT	Ectoderm	Replicate 1	postL-EPI	16 dpf	Epiblast	E7
GCAATCAAGATATGGT	Mesoderm-2	Replicate 1	L-Gast1	16 dpf	Nascent mesoderm	E7.5
GCAATCACATAGAAAC	Mesoderm-1	Replicate 1	L-Gast1	16 dpf	Nascent mesoderm	E7
GCAATCAGTGCAGACA	hPGCLC	Replicate 1	E-PGC	16 dpf	Epiblast	E7
GCAATCATCACATGCA	EPI-like	Replicate 1	postE-EPI	14 dpf	Epiblast	E7
GCAATCATCAGATAAG	Mesoderm-1	Replicate 1	E-Gast	16 dpf	Primitive Streak	E7.5
GCAATCATCGAGAACG	ExE-like	Replicate 1	TE and derivatives	12 dpf	ExE endoderm	E7.25
GCAATCATCGTTTATC	Mesoderm-2	Replicate 1	L-Gast2	16 dpf	Nascent mesoderm	E7.25
GCACATAAGTGGACGT	hPGCLC	Replicate 1	E-PGC	16 dpf	Epiblast	E7.5
GCACATACAGGGCATA	Ectoderm	Replicate 1	postE-EPI	16 dpf	Primitive Streak	E7
GCACATAGTGCCTGTG	Mesoderm-2	Replicate 1	EXMC	11 dpf	Mesenchyme	E7.5
GCACATAGTTATGCGT	EPI-like	Replicate 1	postL-EPI	16 dpf	Epiblast	E6.5
GCACATATCTTAGAGC	EPI-like	Replicate 1	postL-EPI	16 dpf	Epiblast	E7
GCACTCTAGCCACTAT	hPGCLC	Replicate 1	E-PGC	16 dpf	Epiblast	E6.5
GCACTCTCAATTGCTG	Ectoderm	Replicate 1	postL-EPI	16 dpf	Rostral neurectoderm	E7.5
GCACTCTGTCTCCCTA	Mesoderm-2	Replicate 1	L-Gast1	16 dpf	Anterior Primitive Streak	E7.25
GCACTCTGTGGCTCCA	hPGCLC	Replicate 1	E-PGC	16 dpf	Epiblast	E7.25
GCACTCTTCCACGTGG	ExE-like	Replicate 1	TE and derivatives	16 dpf	ExE endoderm	E7.25
GCAGCCAAGAAACCGC	Mesoderm-2	Replicate 1	EXMC	16 dpf	Nascent mesoderm	E7.5
GCAGCCAAGACTTTCG	EPI-like	Replicate 1	postE-EPI	14 dpf	Epiblast	E7
GCAGCCAAGCGAGAAA	Mesoderm-1	Replicate 1	E-Gast	14 dpf	Epiblast	E6.5
GCAGCCAAGGAGCGAG	EPI-like	Replicate 1	postL-EPI	16 dpf	Epiblast	E7
GCAGCCACAACGCACC	Ectoderm	Replicate 1	postL-EPI	17 dpf	Rostral neurectoderm	E7.5
GCAGCCACATCGGAAG	EPI-like	Replicate 1	postE-EPI	16 dpf	Epiblast	E6.5
GCAGCCAGTAAGGATT	hPGCLC	Replicate 1	E-PGC	16 dpf	Epiblast	E7
GCAGTTAAGATACACA	Mesoderm-1	Replicate 1	L-Gast1	16 dpf	Nascent mesoderm	E7.25
GCAGTTAGTAAACGCG	Mesoderm-1	Replicate 1	VE/YE	16 dpf	Primitive Streak	E7.5
GCAGTTATCCACGACG	EPI-like	Replicate 1	postE-EPI	14 dpf	Epiblast	E7
GCAGTTATCTACTTAC	Mesoderm-2	Replicate 1	EXMC	12 dpf	Nascent mesoderm	E7
GCATACACAGCCTTGG	Endoderm	Replicate 1	L-Gast1	16 dpf	Anterior Primitive Streak	E7
GCATGATAGAGGTTAT	Ectoderm	Replicate 1	EXMC	17 dpf	Mesenchyme	E7.5
GCATGATAGCACACAG	hPGCLC	Replicate 1	E-PGC	16 dpf	ExE ectoderm	E7
GCATGATAGTGGAGAA	EPI-like	Replicate 1	postL-EPI	16 dpf	Epiblast	E7
GCATGATCACGTTGGC	Ectoderm	Replicate 1	postL-EPI	17 dpf	Rostral neurectoderm	E7.5
GCATGCGGTGAGGGTT	Endoderm	Replicate 1	EXMC	11 dpf	Mixed mesoderm	E7.5
GCATGTACACCAGATT	Ectoderm	Replicate 1	postL-EPI	17 dpf	Rostral neurectoderm	E7.5
GCATGTACATGAAGTA	Mesoderm-2	Replicate 1	VE/YE	16 dpf	Anterior Primitive Streak	E7
GCATGTACATTGGGCC	EPI-like	Replicate 1	postE-EPI	14 dpf	Primitive Streak	E7.25
GCATGTAGTCGCTTCT	Mesoderm-2	Replicate 1	EXMC	16 dpf	Nascent mesoderm	E7.25
GCCAAATAGCAATATG	ExE-like	Replicate 1	E-AM	12 dpf	ExE ectoderm	E7.25
GCCAAATAGCGTTTAC	Mesoderm-2	Replicate 1	EXMC	12 dpf	Nascent mesoderm	E7.25
GCCAAATGTCTGCGGT	hPGCLC	Replicate 1	E-AM	16 dpf	Epiblast	E6.5
GCCTCTAGTGGTTTCA	ExE-like	Replicate 1	L-AM2	16 dpf	ExE ectoderm	E7
GCCTCTAGTTTGCATG	Endoderm	Replicate 1	VE/YE	16 dpf	Primitive Streak	E7
GCCTCTATCAACACTG	Mesoderm-1	Replicate 1	L-Gast1	16 dpf	Primitive Streak	E7
GCCTCTATCGCCTGTT	Mesoderm-2	Replicate 1	VE/YE	16 dpf	Anterior Primitive Streak	E7.25
GCGACCATCTGGCGAC	EPI-like	Replicate 1	postE-EPI	14 dpf	Primitive Streak	E7.25
GCGAGAAAGAGTGAGA	Mesoderm-2	Replicate 1	EXMC	12 dpf	Nascent mesoderm	E7.5
GCGAGAACAAGAAAGG	EPI-like	Replicate 1	postE-EPI	14 dpf	ExE ectoderm	E7.5
GCGAGAACAATCTACG	Ectoderm	Replicate 1	postE-EPI	16 dpf	Epiblast	E7.5
GCGAGAATCAGTACGT	Mesoderm-1	Replicate 1	L-Gast1	16 dpf	Nascent mesoderm	E7
GCGCAACAGACCTAGG	hPGCLC	Replicate 1	E-PGC	16 dpf	Epiblast	E7.25
GCGCAACAGCTTTGGT	Mesoderm-2	Replicate 1	VE/YE	16 dpf	Anterior Primitive Streak	E7
GCGCAACCAACGATCT	hPGCLC	Replicate 1	E-PGC	16 dpf	Gut	E7.5
GCGCAGTAGCCAGGAT	ExE-like	Replicate 1	TE and derivatives	12 dpf	ExE ectoderm	E7.5
GCGCAGTCACCGGAAA	Endoderm	Replicate 1	VE/YE	16 dpf	Anterior Primitive Streak	E7.25
GCGCAGTCACTCAGGC	Mesoderm-2	Replicate 1	L-Gast2	16 dpf	Nascent mesoderm	E7.25
GCGCAGTCAGCCAGAA	EPI-like	Replicate 1	postE-EPI	14 dpf	ExE ectoderm	E7.5
GCGCAGTGTCGCTTCT	EPI-like	Replicate 1	postE-EPI	14 dpf	Epiblast	E7
GCGCAGTGTTCAACCA	ExE-like	Replicate 1	E-AM	12 dpf	Mesenchyme	E7.5
GCGCAGTTCAGGTTCA	ExE-like	Replicate 1	L-AM2	16 dpf	ExE ectoderm	E7.5
GCGCCAAAGACAATAC	Ectoderm	Replicate 1	EXMC	17 dpf	Mesenchyme	E7.5
GCGCCAAAGACCACGA	Ectoderm	Replicate 1	postL-EPI	17 dpf	Nascent mesoderm	E7.5
GCGCCAAAGACTTTCG	Mesoderm-2	Replicate 1	L-Gast1	16 dpf	Intermediate mesoderm	E7.5
GCGCCAAAGGCACATG	Mesoderm-1	Replicate 1	L-Gast1	16 dpf	Primitive Streak	E7.25
GCGCCAACACACAGAG	Endoderm	Replicate 1	EXMC	16 dpf	Caudal epiblast	E7.5
GCGCCAACAGACGCAA	Mesoderm-1	Replicate 1	postL-EPI	16 dpf	Epiblast	E6.5
GCGCCAACATTGGTAC	Endoderm	Replicate 1	L-Gast1	16 dpf	Anterior Primitive Streak	E7
GCGCCAAGTACCTACA	Mesoderm-2	Replicate 1	EXMC	12 dpf	Nascent mesoderm	E7.25
GCGCCAAGTTAAGGGC	Mesoderm-2	Replicate 1	VE/YE	16 dpf	Anterior Primitive Streak	E7
GCGCGATAGCAGCGTA	EPI-like	Replicate 1	L-Gast1	16 dpf	Epiblast	E7
GCGCGATCAAGGACTG	ExE-like	Replicate 1	TE and derivatives	12 dpf	ExE endoderm	E7.25
GCGCGATCAATGAATG	Mesoderm-2	Replicate 1	EXMC	12 dpf	Nascent mesoderm	E7.25
GCGCGATTCTGGTGTA	Ectoderm	Replicate 1	postL-EPI	17 dpf	Rostral neurectoderm	E7.5
GCGGGTTAGACAAGCC	EPI-like	Replicate 1	postL-EPI	16 dpf	Epiblast	E7
GCGGGTTAGCCAGAAC	Mesoderm-1	Replicate 1	L-Gast1	16 dpf	Primitive Streak	E7
GCGGGTTGTACTCGCG	Mesoderm-2	Replicate 1	VE/YE	16 dpf	Anterior Primitive Streak	E7.25
GCGGGTTTCTTGTATC	EPI-like	Replicate 1	postE-EPI	14 dpf	Epiblast	E7
GCTCCTAGTTTGTGTG	Ectoderm	Replicate 1	postL-EPI	17 dpf	Epiblast	E7.25
GCTCCTATCAGGCCCA	Endoderm	Replicate 1	E-Gast	16 dpf	Primitive Streak	E7
GCTCCTATCGAGAACG	Ectoderm	Replicate 1	postL-EPI	17 dpf	Epiblast	E7.5
GCTCTGTAGTGTTGAA	EPI-like	Replicate 1	postL-EPI	16 dpf	Epiblast	E7.25
GCTCTGTCAAGCTGTT	Ectoderm	Replicate 1	postL-EPI	17 dpf	Epiblast	E7
GCTCTGTCAGTCTTCC	Mesoderm-2	Replicate 1	L-Gast2	16 dpf	Nascent mesoderm	E7
GCTCTGTGTGAGGGAG	ExE-like	Replicate 1	TE and derivatives	12 dpf	ExE endoderm	E7
GCTCTGTTCAGTGCAT	EPI-like	Replicate 1	postE-EPI	14 dpf	Epiblast	E7.25
GCTCTGTTCGTTACAG	Mesoderm-2	Replicate 1	EXMC	12 dpf	Nascent mesoderm	E7.25
GCTGCAGAGGCGACAT	Mesoderm-1	Replicate 1	postE-EPI	16 dpf	Epiblast	E6.5
GCTGCAGAGTACTTGC	ExE-like	Replicate 1	E-AM	14 dpf	ExE ectoderm	E7.5
GCTGCAGCAGGGAGAG	ExE-like	Replicate 1	TE and derivatives	12 dpf	ExE ectoderm	E7.5
GCTGCAGTCACAGTAC	EPI-like	Replicate 1	postE-EPI	14 dpf	Epiblast	E7
GCTGCGAAGCGTCTAT	ExE-like	Replicate 1	TE and derivatives	16 dpf	ExE endoderm	E7.25
GCTGCGAAGTCATGCT	ExE-like	Replicate 1	TE and derivatives	14 dpf	ExE ectoderm	E7.25
GCTGCGACAAAGAATC	ExE-like	Replicate 1	TE and derivatives	12 dpf	ExE ectoderm	E7
GCTGCGACACATAACC	EPI-like	Replicate 1	postE-EPI	14 dpf	Epiblast	E7
GCTGCGAGTACAAGTA	EPI-like	Replicate 1	postE-EPI	14 dpf	Epiblast	E7
GCTGCGATCGGTCTAA	ExE-like	Replicate 1	TE and derivatives	14 dpf	ExE ectoderm	E7.25
GCTGCTTAGGTAGCTG	Ectoderm	Replicate 1	EXMC	17 dpf	Mesenchyme	E7.5
GCTGCTTGTATAAACG	Mesoderm-1	Replicate 1	postL-EPI	16 dpf	Primitive Streak	E7.25
GCTGCTTGTATTCGTG	EPI-like	Replicate 1	postL-EPI	16 dpf	Epiblast	E7
GCTGGGTAGCGCTCCA	EPI-like	Replicate 1	postL-EPI	16 dpf	Epiblast	E7.25
GCTGGGTCATTGGCGC	Mesoderm-1	Replicate 1	postE-EPI	14 dpf	Primitive Streak	E7
GCTGGGTTCCTGTAGA	EPI-like	Replicate 1	postL-EPI	17 dpf	Epiblast	E7
GCTTCCAAGTTCGCAT	Mesoderm-1	Replicate 1	E-Gast	16 dpf	Intermediate mesoderm	E7.5
GCTTCCACAAGGTTCT	EPI-like	Replicate 1	postL-EPI	16 dpf	Epiblast	E7
GCTTGAATCACATAGC	Ectoderm	Replicate 1	postL-EPI	17 dpf	Rostral neurectoderm	E7.5
GCTTGAATCGACGGAA	Mesoderm-2	Replicate 1	L-Gast2	16 dpf	Nascent mesoderm	E7.25
GCTTGAATCTCTGCTG	Mesoderm-2	Replicate 1	EXMC	12 dpf	Nascent mesoderm	E7.25
GGAAAGCAGTGGACGT	ExE-like	Replicate 1	TE and derivatives	12 dpf	ExE ectoderm	E7
GGAAAGCGTCGCTTTC	ExE-like	Replicate 1	E-AM	12 dpf	ExE ectoderm	E7.5
GGAAAGCTCCACGAAT	EPI-like	Replicate 1	postE-EPI	14 dpf	Epiblast	E7
GGAAAGCTCTTGTTTG	EPI-like	Replicate 1	postE-EPI	14 dpf	Epiblast	E7
GGAACTTAGCAGGTCA	Endoderm	Replicate 1	VE/YE	16 dpf	Def. endoderm	E7.25
GGAACTTAGCTCCCAG	Mesoderm-1	Replicate 1	L-Gast2	16 dpf	Primitive Streak	E7.25
GGAACTTGTAAGGGAA	Endoderm	Replicate 1	VE/YE	16 dpf	Def. endoderm	E7.25
GGAACTTGTAGTACCT	ExE-like	Replicate 1	TE and derivatives	14 dpf	ExE ectoderm	E7.5
GGAACTTGTCGCTTTC	hPGCLC	Replicate 1	E-AM	16 dpf	ExE endoderm	E7.5
GGAACTTGTGGTCCGT	ExE-like	Replicate 1	L-AM2	16 dpf	ExE endoderm	E7.5
GGAACTTGTTGATTGC	Endoderm	Replicate 1	EXMC	16 dpf	Anterior Primitive Streak	E7
GGAACTTTCTGGGCCA	EPI-like	Replicate 1	postE-EPI	14 dpf	Epiblast	E7.25
GGACAAGAGCTCTCGG	Ectoderm	Replicate 1	EXMC	17 dpf	Mesenchyme	E7.5
GGACAAGCACCTCGTT	ExE-like	Replicate 1	E-AM	12 dpf	ExE ectoderm	E7.25
GGACAAGTCTGGGCCA	hPGCLC	Replicate 1	E-PGC	16 dpf	Epiblast	E7.5
GGACAGAAGGATGGTC	Mesoderm-1	Replicate 1	L-Gast1	16 dpf	Anterior Primitive Streak	E7.25
GGACAGACACTTCGAA	Mesoderm-2	Replicate 1	L-Gast2	16 dpf	Nascent mesoderm	E7.5
GGACAGATCGATAGAA	hPGCLC	Replicate 1	E-PGC	16 dpf	Primitive Streak	E7
GGACATTAGAGACTAT	Ectoderm	Replicate 1	postE-EPI	16 dpf	Epiblast	E7
GGACATTCAAGTTAAG	Mesoderm-1	Replicate 1	postL-EPI	16 dpf	Epiblast	E7
GGACATTCAGCCTTGG	hPGCLC	Replicate 1	E-PGC	16 dpf	Epiblast	E7
GGACATTGTGTGTGCC	Mesoderm-1	Replicate 1	postE-EPI	14 dpf	Epiblast	E7
GGACATTGTGTTTGTG	hPGCLC	Replicate 1	E-PGC	16 dpf	Epiblast	E6.5
GGACGTCAGCTGTTCA	Mesoderm-2	Replicate 1	EXMC	12 dpf	Nascent mesoderm	E7.5
GGACGTCCATTTGCCC	Mesoderm-2	Replicate 1	L-Gast2	16 dpf	Nascent mesoderm	E7.5
GGAGCAAGTTCTGAAC	Mesoderm-1	Replicate 1	postE-EPI	14 dpf	Primitive Streak	E7.25
GGATGTTCAATCTGCA	Ectoderm	Replicate 1	postL-EPI	17 dpf	Rostral neurectoderm	E7.5
GGATGTTCACTCGACG	Mesoderm-1	Replicate 1	E-Gast	14 dpf	ExE ectoderm	E7
GGATGTTTCATCACCC	ExE-like	Replicate 1	TE and derivatives	12 dpf	ExE ectoderm	E7
GGATGTTTCCACTCCA	Mesoderm-1	Replicate 1	postE-EPI	14 dpf	Epiblast	E7
GGATGTTTCTACCTGC	Mesoderm-2	Replicate 1	L-Gast2	16 dpf	Nascent mesoderm	E7.5
GGATTACCAAGTAGTA	Mesoderm-1	Replicate 1	E-AM	12 dpf	ExE ectoderm	E7
GGATTACTCTTAGCCC	Ectoderm	Replicate 1	postL-EPI	17 dpf	Epiblast	E6.75
GGCAATTAGGAGTTTA	ExE-like	Replicate 1	TE and derivatives	12 dpf	ExE ectoderm	E7.25
GGCCGATAGGCCATAG	Mesoderm-2	Replicate 1	EXMC	12 dpf	Nascent mesoderm	E7.25
GGCCGATGTTCAGTAC	Mesoderm-1	Replicate 1	L-Gast2	16 dpf	Intermediate mesoderm	E7.5
GGCCGATTCACGACTA	Ectoderm	Replicate 1	EXMC	17 dpf	Mesenchyme	E7.5
GGCCGATTCTCGATGA	Mesoderm-1	Replicate 1	postE-EPI	12 dpf	Primitive Streak	E7
GGCGACTAGGCATGTG	Mesoderm-1	Replicate 1	L-Gast1	16 dpf	Nascent mesoderm	E7.5
GGCGACTAGGGATCTG	Ectoderm	Replicate 1	postL-EPI	17 dpf	Gut	E7.5
GGCGACTCACAGGCCT	Mesoderm-1	Replicate 1	L-Gast1	16 dpf	Nascent mesoderm	E7
GGCGACTGTCTAGCCG	Mesoderm-1	Replicate 1	postE-EPI	12 dpf	Primitive Streak	E7
GGCGACTTCTACTATC	EPI-like	Replicate 1	postL-EPI	16 dpf	Primitive Streak	E7.25
GGCGACTTCTGGGCCA	EPI-like	Replicate 1	postE-EPI	14 dpf	Epiblast	E7
GGCGTGTGTCTAGTCA	Mesoderm-1	Replicate 1	postE-EPI	16 dpf	Epiblast	E7.25
GGCTCGAAGGCTCATT	EPI-like	Replicate 1	postE-EPI	14 dpf	Epiblast	E6.5
GGCTCGACAAACAACA	hPGCLC	Replicate 1	E-Gast	14 dpf	ExE ectoderm	E7
GGCTCGAGTCGATTGT	Mesoderm-1	Replicate 1	L-Gast1	16 dpf	Primitive Streak	E7
GGCTCGATCCGTAGTA	Endoderm	Replicate 1	VE/YE	16 dpf	Primitive Streak	E7.25
GGCTGGTAGCCCAATT	Ectoderm	Replicate 1	postE-EPI	16 dpf	Epiblast	E7.5
GGCTGGTAGTGGGCTA	hPGCLC	Replicate 1	E-PGC	16 dpf	Epiblast	E7.5
GGCTGGTGTTATCGGT	hPGCLC	Replicate 1	E-Gast	14 dpf	Epiblast	E7
GGCTGGTTCAGCACAT	hPGCLC	Replicate 1	E-PGC	16 dpf	Epiblast	E7.25
GGCTGGTTCATTGCCC	Mesoderm-1	Replicate 1	postL-EPI	16 dpf	Anterior Primitive Streak	E7.25
GGGAATGCAAGCTGGA	Mesoderm-1	Replicate 1	L-Gast1	16 dpf	Caudal epiblast	E7.5
GGGAATGGTCTAGCGC	Ectoderm	Replicate 1	L-AM2	16 dpf	ExE ectoderm	E7.25
GGGACCTAGAAACCGC	Ectoderm	Replicate 1	postL-EPI	17 dpf	Epiblast	E7.25
GGGACCTCAACACGCC	ExE-like	Replicate 1	L-AM2	16 dpf	Mesenchyme	E7.5
GGGACCTTCCTTCAAT	Mesoderm-1	Replicate 1	E-Gast	14 dpf	Primitive Streak	E7.25
GGGACCTTCTACCTGC	EPI-like	Replicate 1	postE-EPI	14 dpf	Epiblast	E7
GGGAGATGTCTCCCTA	EPI-like	Replicate 1	postL-EPI	16 dpf	Epiblast	E7
GGGAGATTCGTACCGG	EPI-like	Replicate 1	postE-EPI	14 dpf	Epiblast	E7
GGGAGATTCTACTTAC	Mesoderm-1	Replicate 1	E-AM	16 dpf	Epiblast	E7
GGGCACTAGAGAGCTC	Mesoderm-1	Replicate 1	E-Gast	16 dpf	Primitive Streak	E7.25
GGGCACTAGGGTGTGT	ExE-like	Replicate 1	E-AM	12 dpf	ExE ectoderm	E7.25
GGGCACTGTAACGCGA	Ectoderm	Replicate 1	EXMC	17 dpf	Mesenchyme	E7.5
GGGCACTGTAGCGTCC	EPI-like	Replicate 1	postL-EPI	16 dpf	Epiblast	E7
GGGCACTTCCAGAGGA	EPI-like	Replicate 1	postE-EPI	14 dpf	Epiblast	E7
GGGTCTGAGCACAGGT	Ectoderm	Replicate 1	EXMC	17 dpf	Mesenchyme	E7.5
GGGTCTGAGCGCCTCA	hPGCLC	Replicate 1	E-PGC	16 dpf	Epiblast	E7.5
GGGTCTGAGTAGTGCG	Mesoderm-1	Replicate 1	postE-EPI	16 dpf	Epiblast	E6.5
GGGTCTGTCTTCGGTC	ExE-like	Replicate 1	E-AM	16 dpf	ExE ectoderm	E7
GGGTTGCTCCCTGACT	ExE-like	Replicate 1	TE and derivatives	14 dpf	ExE ectoderm	E7.25
GGTATTGAGTGTGGCA	Mesoderm-1	Replicate 1	L-Gast1	16 dpf	Epiblast	E6.5
GGTATTGGTCACAAGG	Ectoderm	Replicate 1	postL-EPI	16 dpf	Epiblast	E7.5
GGTATTGGTCGACTGC	hPGCLC	Replicate 1	E-AM	12 dpf	ExE ectoderm	E7.5
GGTATTGTCGTGGGAA	Mesoderm-1	Replicate 1	postL-EPI	16 dpf	Primitive Streak	E7
GGTGAAGAGAACAACT	Endoderm	Replicate 1	EXMC	16 dpf	Epiblast	E7.25
GGTGAAGCATTCTTAC	EPI-like	Replicate 1	postE-EPI	14 dpf	Epiblast	E6.5
GGTGCGTAGATCCTGT	ExE-like	Replicate 1	E-AM	12 dpf	ExE endoderm	E7
GGTGCGTAGTTACCCA	Mesoderm-2	Replicate 1	EXMC	12 dpf	Mixed mesoderm	E7.25
GGTGCGTGTCTTCGTC	EPI-like	Replicate 1	postE-EPI	14 dpf	Epiblast	E7
GGTGCGTGTGGTTTCA	Mesoderm-2	Replicate 1	L-Gast1	16 dpf	Primitive Streak	E7.25
GGTGCGTGTTAGGGTG	EPI-like	Replicate 1	postE-EPI	14 dpf	Epiblast	E7
GGTGCGTGTTGCGCAC	Ectoderm	Replicate 1	postL-EPI	17 dpf	Rostral neurectoderm	E7.5
GGTGCGTTCATGCTCC	hPGCLC	Replicate 1	E-PGC	16 dpf	Gut	E7.5
GGTGCGTTCTCCTATA	Endoderm	Replicate 1	L-Gast1	16 dpf	Anterior Primitive Streak	E7.5
GGTGTTAGTAGAGCTG	Ectoderm	Replicate 1	postL-EPI	16 dpf	Epiblast	E7
GTAACGTAGGTGCAAC	hPGCLC	Replicate 1	E-PGC	16 dpf	Epiblast	E7
GTAACGTGTGCATCTA	Mesoderm-1	Replicate 1	L-Gast1	16 dpf	Nascent mesoderm	E7
GTAACGTTCACCGGGT	Mesoderm-1	Replicate 1	E-Gast	14 dpf	Epiblast	E7
GTAACTGCACCGGAAA	hPGCLC	Replicate 1	E-AM	12 dpf	ExE ectoderm	E7.25
GTAACTGCAGCTATTG	EPI-like	Replicate 1	postE-EPI	14 dpf	Epiblast	E7.5
GTAACTGCATCGATTG	Mesoderm-2	Replicate 1	EXMC	14 dpf	Nascent mesoderm	E7.25
GTAACTGTCTTAACCT	Mesoderm-1	Replicate 1	E-Gast	14 dpf	Epiblast	E7.25
GTACGTACAACGATCT	Ectoderm	Replicate 1	postL-EPI	17 dpf	Rostral neurectoderm	E7.5
GTACGTACAGTTTACG	ExE-like	Replicate 1	TE and derivatives	12 dpf	ExE ectoderm	E7
GTACGTATCTGCTGCT	Mesoderm-1	Replicate 1	L-Gast1	16 dpf	Nascent mesoderm	E7
GTACTCCAGATGAGAG	hPGCLC	Replicate 1	E-PGC	16 dpf	Epiblast	E7
GTACTCCCACGGCCAT	Ectoderm	Replicate 1	postL-EPI	17 dpf	Rostral neurectoderm	E7.5
GTACTCCGTAGAAAGG	Ectoderm	Replicate 1	postE-EPI	14 dpf	Epiblast	E7
GTACTTTTCCAAGCCG	Ectoderm	Replicate 1	postL-EPI	17 dpf	Primitive Streak	E7.5
GTAGGCCCAATCGGTT	Mesoderm-2	Replicate 1	L-Gast2	16 dpf	Nascent mesoderm	E7.5
GTAGGCCTCTCAACTT	EPI-like	Replicate 1	postE-EPI	14 dpf	Epiblast	E6.5
GTAGGCCTCTCTGTCG	EPI-like	Replicate 1	postE-EPI	14 dpf	Epiblast	E7.25
GTAGTCAAGCCCTAAT	Endoderm	Replicate 1	L-Gast2	16 dpf	Anterior Primitive Streak	E7
GTAGTCACACTTAACG	Mesoderm-1	Replicate 1	postE-EPI	12 dpf	Epiblast	E7
GTAGTCACATGTTCCC	ExE-like	Replicate 1	E-AM	12 dpf	ExE ectoderm	E7.5
GTATCTTAGGATTCGG	EPI-like	Replicate 1	postL-EPI	16 dpf	Epiblast	E7
GTATCTTCAAGCGAGT	Mesoderm-1	Replicate 1	postE-EPI	16 dpf	Primitive Streak	E7
GTATCTTCAGTGGAGT	Mesoderm-1	Replicate 1	postE-EPI	16 dpf	Epiblast	E6.5
GTATCTTGTCTGGAGA	hPGCLC	Replicate 1	E-PGC	16 dpf	Anterior Primitive Streak	E7
GTATTCTGTCCGTCAG	Ectoderm	Replicate 1	postL-EPI	17 dpf	Rostral neurectoderm	E7.5
GTATTCTGTGGGTCAA	Ectoderm	Replicate 1	postL-EPI	17 dpf	Rostral neurectoderm	E7.5
GTATTCTTCGTACGGC	hPGCLC	Replicate 1	E-PGC	16 dpf	Epiblast	E7.25
[truncated: 477 more rows]

## Sheet: Gast.cyno.comparison
Number of gastruloid cells predicted to correspond to monkey cell types
		Monkey cell types
		E-AM	E-Gast	E-PGC	EXMC	L-AM2	L-Gast1	L-Gast2	postE-EPI	postL-EPI	TE and derivatives	VE/YE	Total
Gastruloid clusters	Ectoderm	5	1	1	70	1	0	0	13	180	2	0	273
	EPI-like	0	0	0	0	0	6	0	340	135	0	0	481
	Mesoderm-1	8	74	1	6	0	194	9	123	30	0	3	448
	Mesoderm-2	0	2	0	232	0	24	89	0	0	0	79	426
	Endoderm	1	21	7	50	0	17	8	0	1	0	58	163
	hPGCLC	29	26	278	13	0	0	0	1	0	0	1	348
	ExE-like	63	3	0	0	93	1	0	3	1	172	0	336
Percent of gastruloid cells predicted to correspond to monkey cell types
		Monkey cell types
		E-AM	E-Gast	E-PGC	EXMC	L-AM2	L-Gast1	L-Gast2	postE-EPI	postL-EPI	TE and derivatives	VE/YE	Total
Gastruloid clusters	Ectoderm	1.8315	0.3663	0.3663	25.641	0.3663	0	0	4.7619	65.9341	0.732601	0	100
	EPI-like	0	0	0	0	0	1.2474	0	70.6861	28.0665	0	0	100
	Mesoderm-1	1.78571	16.5179	0.223214	1.33929	0	43.3036	2.00893	27.4554	6.69643	0	0.669643	100
	Mesoderm-2	0	0.469484	0	54.4601	0	5.6338	20.892	0	0	0	18.5446	100
	Endoderm	0.613497	12.8834	4.29448	30.6748	0	10.4294	4.90798	0	0.613497	0	35.5828	100
	hPGCLC	8.33333	7.47126	79.8851	3.73563	0	0	0	0.287356	0	0	0.287356	100
	ExE-like	18.75	0.892857	0	0	27.6786	0.297619	0	0.892857	0.297619	51.1905	0	100
P-values of gastruloid cell type correspondances to monkey cell types calculated by permutation tests
		Monkey cell types
		E-AM	E-Gast	E-PGC	EXMC	L-AM2	L-Gast1	L-Gast2	postE-EPI	postL-EPI	TE and derivatives	VE/YE
Gastruloid clusters	Ectoderm	0.995005	1	1	0.000999001	1	1	1	1	0.000999001	1	1
	EPI-like	1	1	1	1	1	1	1	0.000999001	0.000999001	1	1
	Mesoderm-1	0.999001	0.000999001	1	1	1	0.000999001	0.997003	0.000999001	1	1	1
	Mesoderm-2	1	1	1	0.000999001	1	0.998002	0.000999001	1	1	1	0.000999001
	Endoderm	0.999001	0.000999001	1	0.000999001	1	0.458541	0.434565	1	1	1	0.000999001
	hPGCLC	0.000999001	0.036963	0.000999001	1	1	1	1	1	1	1	1
	ExE-like	0.000999001	1	1	1	0.000999001	1	1	1	1	0.000999001	1

## Sheet: Gast.mouse.comparison
Number of gastruloid cells predicted to correspond to mouse cell types
		Mouse cell types
		Anterior Primitive Streak	Blood progenitors 2	Caudal epiblast	Def. endoderm	Epiblast	ExE ectoderm	ExE endoderm	ExE mesoderm	Gut	Haematoendothelial progenitors	Intermediate mesoderm	Mesenchyme	Mixed mesoderm	Nascent mesoderm	Paraxial mesoderm	Parietal endoderm	PGC	Primitive Streak	Rostral neurectoderm	Surface ectoderm	Visceral endoderm	Total
Gastruloid clusters	Ectoderm	3	0	0	3	72	13	4	8	1	0	0	53	8	2	1	0	1	6	96	2	0	273
	EPI-like	0	0	0	0	412	23	0	0	0	0	0	0	0	0	0	0	0	43	3	0	0	481
	Mesoderm-1	22	1	17	7	104	13	5	0	1	0	10	0	2	63	0	0	0	199	3	0	1	448
	Mesoderm-2	72	0	0	5	0	0	1	0	0	0	6	2	27	302	0	0	0	10	1	0	0	426
	Endoderm	30	1	3	38	17	2	21	1	3	3	0	1	4	15	1	0	0	20	3	0	0	163
	hPGCLC	1	4	0	2	222	46	36	0	3	0	1	0	2	0	0	1	2	15	8	3	2	348
	ExE-like	0	0	0	0	0	257	66	0	0	0	0	11	0	0	0	0	0	0	0	2	0	336
Percent of gastruloid cells predicted to correspond to mouse cell types
		Mouse cell types
		Anterior Primitive Streak	Blood progenitors 2	Caudal epiblast	Def. endoderm	Epiblast	ExE ectoderm	ExE endoderm	ExE mesoderm	Gut	Haematoendothelial progenitors	Intermediate mesoderm	Mesenchyme	Mixed mesoderm	Nascent mesoderm	Paraxial mesoderm	Parietal endoderm	PGC	Primitive Streak	Rostral neurectoderm	Surface ectoderm	Visceral endoderm	Total
Gastruloid clusters	Ectoderm	1.0989	0	0	1.0989	26.3736	4.7619	1.4652	2.9304	0.3663	0	0	19.4139	2.9304	0.732601	0.3663	0	0.3663	2.1978	35.1648	0.732601	0	100
	EPI-like	0	0	0	0	85.6549	4.7817	0	0	0	0	0	0	0	0	0	0	0	8.93971	0.623701	0	0	100
	Mesoderm-1	4.91071	0.223214	3.79464	1.5625	23.2143	2.90179	1.11607	0	0.223214	0	2.23214	0	0.446429	14.0625	0	0	0	44.4196	0.669643	0	0.223214	100
	Mesoderm-2	16.9014	0	0	1.17371	0	0	0.234742	0	0	0	1.40845	0.469484	6.33803	70.892	0	0	0	2.34742	0.234742	0	0	100
	Endoderm	18.4049	0.613497	1.84049	23.3129	10.4294	1.22699	12.8834	0.613497	1.84049	1.84049	0	0.613497	2.45399	9.20245	0.613497	0	0	12.2699	1.84049	0	0	100
	hPGCLC	0.287356	1.14943	0	0.574713	63.7931	13.2184	10.3448	0	0.862069	0	0.287356	0	0.574713	0	0	0.287356	0.574713	4.31034	2.29885	0.862069	0.574713	100
	ExE-like	0	0	0	0	0	76.4881	19.6429	0	0	0	0	3.27381	0	0	0	0	0	0	0	0.595238	0	100
P-values of gastruloid cell type correspondances to mouse cell types calculated by permutation tests
		Mouse cell types
		Anterior Primitive Streak	Blood progenitors 2	Caudal epiblast	Def. endoderm	Epiblast	ExE ectoderm	ExE endoderm	ExE mesoderm	Gut	Haematoendothelial progenitors	Intermediate mesoderm	Mesenchyme	Mixed mesoderm	Nascent mesoderm	Paraxial mesoderm	Parietal endoderm	PGC	Primitive Streak	Rostral neurectoderm	Visceral endoderm	Surface ectoderm
Gastruloid clusters	Ectoderm	1	1	1	0.94006	0.991009	1	1	0.000999001	0.625375	1	1	0.000999001	0.108891	1	0.215784	1	0.280719	1	0.000999001	1	0.182817
	EPI-like	1	1	1	1	0.000999001	1	1	1	1	1	1	1	1	1	1	1	1	0.982018	1	1	1
	Mesoderm-1	0.641359	0.653347	0.000999001	0.865135	1	1	1	1	0.766234	1	0.000999001	1	0.995005	0.809191	1	1	1	0.000999001	1	0.412587	1
	Mesoderm-2	0.000999001	1	1	0.957043	1	1	1	1	1	1	0.0749251	1	0.000999001	0.000999001	1	1	1	1	1	1	1
	Endoderm	0.000999001	0.355644	0.124875	0.000999001	1	1	0.000999001	0.43956	0.00799201	0.002997	1	0.977023	0.300699	0.992008	0.126873	1	1	0.486513	0.98002	1	1
	hPGCLC	1	0.010989	1	0.996004	0.000999001	0.754246	0.000999001	1	0.102897	1	0.923077	1	0.981019	1	1	0.140859	0.0669331	1	0.986014	0.046953	0.0689311
	ExE-like	1	1	1	1	1	0.000999001	0.000999001	1	1	1	1	0.291708	1	1	1	1	1	1	1	1	0.230769
