# Supplementary material for: High-resolution transcriptional and morphogenetic profiling of cells from micropatterned human ESC gastruloid cultures
Source: eLife journal article supplement (doi:10.7554/elife.59445), 2020-11-18
Supplement: supp [file elife-59445-supp-v1.zip › elife_poa_e59445_Source_data_2.xlsx]

## Sheet: Gast.Markers
Gastruloid marker genes
	p_val	avg_logFC	pct.1	pct.2	p_val_adj	cluster	gene
DLK1	9.62981e-93	1.24537	0.56	0.115	2.24095e-88	Ectoderm	DLK1
GPC3	9.63338e-84	0.937757	0.85	0.401	2.24178e-79	Ectoderm	GPC3
CRABP2	1.46902e-79	0.853596	0.967	0.881	3.41856e-75	Ectoderm	CRABP2
RP11-82C23.2	1.85359e-76	0.293486	0.275	0.021	4.31349e-72	Ectoderm	RP11-82C23.2
SFRP1	1.15033e-71	0.756568	0.788	0.347	2.67692e-67	Ectoderm	SFRP1
GREB1L	3.39551e-71	0.263816	0.381	0.056	7.9017e-67	Ectoderm	GREB1L
CDH6	1.24244e-70	0.352699	0.374	0.057	2.89127e-66	Ectoderm	CDH6
TFPI	2.51235e-69	0.700306	0.59	0.188	5.84649e-65	Ectoderm	TFPI
TTYH1	1.44079e-68	0.326306	0.505	0.122	3.35285e-64	Ectoderm	TTYH1
LGI1	3.44914e-66	0.283232	0.275	0.028	8.02649e-62	Ectoderm	LGI1
C1orf21	2.12864e-65	0.424189	0.725	0.298	4.95355e-61	Ectoderm	C1orf21
COL2A1	2.54111e-62	0.374829	0.308	0.042	5.91342e-58	Ectoderm	COL2A1
NNAT	4.56891e-59	0.604964	0.788	0.454	1.06323e-54	Ectoderm	NNAT
SOX2	5.71017e-59	0.684216	0.773	0.371	1.32881e-54	Ectoderm	SOX2
VIM	2.72591e-57	0.970089	0.938	0.745	6.34345e-53	Ectoderm	VIM
FXYD6	3.92685e-54	0.375767	0.718	0.352	9.13817e-50	Ectoderm	FXYD6
MDK	1.45313e-53	0.515873	1	0.997	3.38157e-49	Ectoderm	MDK
FRZB	3.69244e-50	0.350275	0.538	0.191	8.59267e-46	Ectoderm	FRZB
TUBA1A	5.72382e-48	0.585041	0.996	0.97	1.33199e-43	Ectoderm	TUBA1A
CLU	2.63758e-45	0.842269	0.835	0.647	6.13791e-41	Ectoderm	CLU
LOXL1	2.19232e-42	0.264308	0.333	0.079	5.10175e-38	Ectoderm	LOXL1
S100A4	7.49981e-40	0.537506	0.766	0.487	1.74528e-35	Ectoderm	S100A4
PTN	1.02703e-39	0.721589	0.894	0.787	2.39001e-35	Ectoderm	PTN
CCDC80	1.11905e-35	0.288234	0.275	0.06	2.60415e-31	Ectoderm	CCDC80
PTMS	1.27177e-35	0.349332	1	0.988	2.95954e-31	Ectoderm	PTMS
FST	1.5822e-34	0.715477	0.897	0.681	3.68195e-30	Ectoderm	FST
IGFBP5	1.75389e-34	0.775923	0.293	0.071	4.08147e-30	Ectoderm	IGFBP5
LIX1	3.0945e-33	0.538975	0.626	0.328	7.2012e-29	Ectoderm	LIX1
CXADR	9.58478e-32	0.361033	0.952	0.908	2.23047e-27	Ectoderm	CXADR
CCDC160	9.8155e-32	0.266166	0.524	0.242	2.28417e-27	Ectoderm	CCDC160
PPP2R2B	3.87738e-31	0.284268	0.597	0.302	9.02305e-27	Ectoderm	PPP2R2B
SESN3	7.20797e-31	0.288166	0.736	0.397	1.67737e-26	Ectoderm	SESN3
FGFR1	2.03175e-30	0.304694	0.832	0.609	4.72809e-26	Ectoderm	FGFR1
S100A13	7.5505e-30	0.3951	0.938	0.871	1.75708e-25	Ectoderm	S100A13
MEST	8.78361e-30	0.344257	0.886	0.75	2.04403e-25	Ectoderm	MEST
CNN3	9.79235e-30	0.327794	0.989	0.966	2.27878e-25	Ectoderm	CNN3
LITAF	1.32753e-29	0.413301	0.81	0.66	3.08929e-25	Ectoderm	LITAF
CADM1	3.32519e-29	0.303307	0.56	0.276	7.73804e-25	Ectoderm	CADM1
CCND1	1.3357e-28	0.375175	0.934	0.777	3.10831e-24	Ectoderm	CCND1
MALAT1	3.48782e-28	0.256432	1	1	8.1165e-24	Ectoderm	MALAT1
TMSB15A	4.93603e-28	0.39299	0.96	0.877	1.14866e-23	Ectoderm	TMSB15A
BTG1	5.50246e-28	0.329495	0.795	0.611	1.28048e-23	Ectoderm	BTG1
CPE	2.7385e-27	0.360539	0.425	0.188	6.37277e-23	Ectoderm	CPE
PLS3	5.39558e-27	0.383286	0.901	0.766	1.25561e-22	Ectoderm	PLS3
S100A6	1.75298e-26	0.41228	0.678	0.422	4.07936e-22	Ectoderm	S100A6
DPYSL3	1.95321e-26	0.390275	0.832	0.649	4.54531e-22	Ectoderm	DPYSL3
PMEL	2.03851e-26	0.341919	0.681	0.462	4.74381e-22	Ectoderm	PMEL
SH3BGRL3	1.44873e-25	0.295143	0.956	0.928	3.37133e-21	Ectoderm	SH3BGRL3
UBE2L6	3.29448e-25	0.253167	0.645	0.417	7.66658e-21	Ectoderm	UBE2L6
EIF4A2	4.20123e-24	0.263334	0.974	0.945	9.77668e-20	Ectoderm	EIF4A2
NRP2	5.56594e-24	0.467285	0.63	0.371	1.29525e-19	Ectoderm	NRP2
AP1S2	1.27319e-23	0.368111	0.945	0.875	2.96285e-19	Ectoderm	AP1S2
CDH11	3.57621e-23	0.363543	0.388	0.162	8.3222e-19	Ectoderm	CDH11
PTPRZ1	4.13247e-23	0.427625	0.78	0.508	9.61666e-19	Ectoderm	PTPRZ1
FEZ1	7.55651e-23	0.351999	0.663	0.457	1.75847e-18	Ectoderm	FEZ1
HTRA1	1.81909e-22	0.32216	0.315	0.118	4.23321e-18	Ectoderm	HTRA1
SPRY1	2.94171e-20	0.430064	0.67	0.451	6.84566e-16	Ectoderm	SPRY1
MRPS6	3.23767e-20	0.309303	0.949	0.939	7.53439e-16	Ectoderm	MRPS6
ITSN1	6.81986e-20	0.261222	0.817	0.685	1.58705e-15	Ectoderm	ITSN1
CITED2	1.14894e-19	0.364812	0.853	0.752	2.67371e-15	Ectoderm	CITED2
TNNT1	1.22363e-19	0.339487	0.828	0.812	2.84752e-15	Ectoderm	TNNT1
MAP1B	2.80336e-19	0.499119	0.989	0.969	6.5237e-15	Ectoderm	MAP1B
FGFBP3	1.55493e-18	0.580998	0.656	0.499	3.61847e-14	Ectoderm	FGFBP3
BST2	4.7733e-18	0.332207	0.674	0.49	1.1108e-13	Ectoderm	BST2
ZFP36L1	1.00599e-17	0.280705	0.824	0.672	2.34104e-13	Ectoderm	ZFP36L1
ATP2B1	3.71904e-17	0.329297	0.905	0.82	8.65457e-13	Ectoderm	ATP2B1
FREM2	1.95208e-16	0.383436	0.44	0.236	4.54269e-12	Ectoderm	FREM2
NUCB2	1.49076e-15	0.286669	0.7	0.572	3.46916e-11	Ectoderm	NUCB2
HES1	1.10084e-14	0.438588	0.872	0.737	2.56176e-10	Ectoderm	HES1
ID2	2.78618e-14	0.339738	0.938	0.901	6.48372e-10	Ectoderm	ID2
NES	1.23597e-13	0.269778	0.795	0.697	2.87623e-09	Ectoderm	NES
HEY1	1.37439e-13	0.292163	0.352	0.178	3.19835e-09	Ectoderm	HEY1
PAPSS1	2.7764e-13	0.293737	0.769	0.653	6.46096e-09	Ectoderm	PAPSS1
HP1BP3	9.0275e-13	0.267862	0.886	0.815	2.10079e-08	Ectoderm	HP1BP3
PRTG	1.26972e-12	0.609454	0.751	0.661	2.95476e-08	Ectoderm	PRTG
DDIT4	1.34993e-12	0.400801	0.59	0.428	3.14142e-08	Ectoderm	DDIT4
CNTNAP2	2.68266e-12	0.384558	0.952	0.853	6.24281e-08	Ectoderm	CNTNAP2
IGFBP7	2.69268e-12	0.70873	0.414	0.251	6.26613e-08	Ectoderm	IGFBP7
DLX5	8.93396e-12	0.331974	0.37	0.206	2.07902e-07	Ectoderm	DLX5
CSRP2	1.16664e-11	0.274209	0.971	0.952	2.71488e-07	Ectoderm	CSRP2
TPBG	6.51532e-10	0.266821	0.454	0.326	1.51618e-05	Ectoderm	TPBG
ENC1	1.36547e-09	0.474015	0.615	0.53	3.17758e-05	Ectoderm	ENC1
LEFTY2	1.57517e-09	0.362114	0.286	0.158	3.66558e-05	Ectoderm	LEFTY2
MMD	2.43969e-09	0.332463	0.645	0.526	5.67741e-05	Ectoderm	MMD
USP44	6.59694e-09	0.270809	0.612	0.485	0.000153517	Ectoderm	USP44
HAPLN1	1.66091e-08	0.532891	0.593	0.48	0.00038651	Ectoderm	HAPLN1
RGS5	5.99027e-07	0.605308	0.458	0.351	0.01394	Ectoderm	RGS5
TLE4	8.31333e-07	0.450467	0.868	0.806	0.0193459	Ectoderm	TLE4
NREP	9.88988e-07	0.335197	0.875	0.824	0.0230147	Ectoderm	NREP
ID3	2.21386e-06	0.396373	0.978	0.94	0.0515187	Ectoderm	ID3
GOLIM4	3.02832e-06	0.380182	0.795	0.724	0.070472	Ectoderm	GOLIM4
CYB5A	5.31314e-06	0.40954	0.883	0.829	0.123642	Ectoderm	CYB5A
PKM	9.06726e-06	0.322384	0.982	0.986	0.211004	Ectoderm	PKM
CENPF	5.12694e-05	0.259102	0.967	0.975	1	Ectoderm	CENPF
LECT1	5.16289e-05	0.327505	0.458	0.414	1	Ectoderm	LECT1
SAT1	6.34984e-05	0.514889	0.788	0.759	1	Ectoderm	SAT1
MIR302B	9.8087e-05	0.327998	0.769	0.681	1	Ectoderm	MIR302B
ITGAV	0.000277708	0.36937	0.374	0.315	1	Ectoderm	ITGAV
DKK1	0.0011676	0.39517	0.333	0.261	1	Ectoderm	DKK1
ACTC1	0.00953919	0.763777	0.659	0.64	1	Ectoderm	ACTC1
USP441	1.32447e-203	0.81859	0.973	0.384	3.08218e-199	EPI-like	USP44
TERF1	1.83903e-199	1.00525	1	0.924	4.27962e-195	EPI-like	TERF1
POLR3G	3.97801e-197	0.911075	0.985	0.52	9.25722e-193	EPI-like	POLR3G
GDF3	7.00407e-176	0.904917	0.888	0.29	1.62992e-171	EPI-like	GDF3
DPPA4	9.14956e-167	0.738215	1	0.939	2.12919e-162	EPI-like	DPPA4
AK4	1.53143e-159	0.580403	0.902	0.366	3.56379e-155	EPI-like	AK4
LINC00678	3.32054e-156	0.644403	0.948	0.455	7.72722e-152	EPI-like	LINC00678
PLA2G16	1.86463e-155	0.729631	0.988	0.7	4.33919e-151	EPI-like	PLA2G16
SOX21	2.512e-150	0.59266	0.89	0.301	5.84567e-146	EPI-like	SOX2
RP11-1144P22.1	9.34961e-145	0.739745	0.996	0.663	2.17575e-140	EPI-like	RP11-1144P22.1
RP4-792G4.2	5.65448e-137	0.653149	0.765	0.269	1.31585e-132	EPI-like	RP4-792G4.2
L1TD1	1.16806e-128	0.518537	1	0.981	2.71818e-124	EPI-like	L1TD1
NQO2	1.48268e-123	0.647098	0.977	0.814	3.45035e-119	EPI-like	NQO2
PEBP1	2.11512e-114	0.492232	0.998	0.976	4.92209e-110	EPI-like	PEBP1
VSNL1	1.9918e-110	0.397004	0.844	0.352	4.63513e-106	EPI-like	VSNL1
UGP2	1.74369e-109	0.55543	1	0.967	4.05775e-105	EPI-like	UGP2
NODAL	4.42694e-107	0.515786	0.852	0.371	1.03019e-102	EPI-like	NODAL
TDGF1	1.13303e-105	0.631368	0.977	0.694	2.63668e-101	EPI-like	TDGF1
PTPRZ11	1.39386e-98	0.595924	0.902	0.45	3.24365e-94	EPI-like	PTPRZ1
PSIP1	2.85544e-97	0.467302	1	0.98	6.64489e-93	EPI-like	PSIP1
NPM3	1.36012e-96	0.447873	0.994	0.863	3.16514e-92	EPI-like	NPM3
TUBB2B	6.85547e-91	0.561531	0.996	0.961	1.59534e-86	EPI-like	TUBB2B
POU5F1	1.06549e-86	0.393299	1	0.978	2.47949e-82	EPI-like	POU5F1
THY1	9.48561e-86	0.425888	0.927	0.618	2.2074e-81	EPI-like	THY1
C9orf135	5.44653e-81	0.270009	0.609	0.195	1.26746e-76	EPI-like	C9orf135
ZNF770	1.51362e-80	0.411397	0.956	0.724	3.52234e-76	EPI-like	ZNF770
IQGAP2	2.16071e-78	0.302983	0.759	0.337	5.02819e-74	EPI-like	IQGAP2
LECT11	3.43039e-78	0.328489	0.748	0.339	7.98285e-74	EPI-like	LECT1
SCG3	5.86131e-78	0.398515	0.977	0.801	1.36399e-73	EPI-like	SCG3
RP11-132A1.4	7.91464e-76	0.253696	0.636	0.221	1.84182e-71	EPI-like	RP11-132A1.4
CDCA7L	6.41808e-75	0.32566	0.844	0.455	1.49355e-70	EPI-like	CDCA7L
CLU1	1.17655e-74	0.380634	0.921	0.606	2.73796e-70	EPI-like	CLU
PMAIP1	2.57435e-74	0.458735	0.971	0.749	5.99077e-70	EPI-like	PMAIP1
SERBP1	3.62863e-74	0.28239	1	0.999	8.4442e-70	EPI-like	SERBP1
CASP3	4.58327e-73	0.392316	0.936	0.727	1.06657e-68	EPI-like	CASP3
NPM1	9.424e-72	0.288967	1	1	2.19306e-67	EPI-like	NPM1
GLIPR1L1	1.35912e-71	0.300341	0.605	0.207	3.1628e-67	EPI-like	GLIPR1L1
PPA1	3.97494e-71	0.40195	0.988	0.896	9.25008e-67	EPI-like	PPA1
ALDH3A2	9.25941e-71	0.351977	0.879	0.556	2.15476e-66	EPI-like	ALDH3A2
VCAN	1.74071e-70	0.504602	0.954	0.776	4.0508e-66	EPI-like	VCAN
MGST1	9.29408e-70	0.402055	0.994	0.941	2.16283e-65	EPI-like	MGST1
DNMT3B	3.17432e-69	0.37239	0.94	0.662	7.38696e-65	EPI-like	DNMT3B
SSB	5.70504e-69	0.290346	1	0.989	1.32762e-64	EPI-like	SSB
PPP2R2B1	1.32742e-68	0.251976	0.655	0.257	3.08904e-64	EPI-like	PPP2R2B
VASH2	3.38292e-63	0.281779	0.719	0.33	7.8724e-59	EPI-like	VASH2
AP1S21	2.07037e-62	0.357015	0.977	0.86	4.81797e-58	EPI-like	AP1S2
PARP1	5.62865e-61	0.314088	0.996	0.976	1.30984e-56	EPI-like	PARP1
COX5A	1.04666e-60	0.263257	1	0.989	2.43569e-56	EPI-like	COX5A
TUBB2A	3.18568e-60	0.471014	0.994	0.88	7.4134e-56	EPI-like	TUBB2A
MYO10	6.89314e-60	0.299131	0.971	0.762	1.6041e-55	EPI-like	MYO10
OAZ2	9.17423e-60	0.351976	0.975	0.891	2.13493e-55	EPI-like	OAZ2
SFRP2	4.99397e-59	0.331508	0.99	0.861	1.16215e-54	EPI-like	SFRP2
MAD2L2	1.28619e-58	0.329523	0.96	0.853	2.99309e-54	EPI-like	MAD2L2
SET	5.78806e-58	0.266515	1	1	1.34694e-53	EPI-like	SET
CYCS	1.90122e-55	0.310706	0.998	0.963	4.42434e-51	EPI-like	CYCS
TALDO1	1.78794e-54	0.314843	0.969	0.906	4.16072e-50	EPI-like	TALDO1
PHC1	1.65446e-53	0.266419	0.792	0.449	3.85009e-49	EPI-like	PHC1
EIF4EBP1	2.17069e-53	0.298773	0.992	0.909	5.05142e-49	EPI-like	EIF4EBP1
CD9	5.60989e-51	0.330037	0.931	0.73	1.30548e-46	EPI-like	CD9
CKB	1.72774e-49	0.342178	0.977	0.875	4.02062e-45	EPI-like	CKB
OCIAD2	2.69276e-49	0.27888	0.988	0.925	6.26633e-45	EPI-like	OCIAD2
GGCT	1.213e-47	0.277343	0.992	0.91	2.82277e-43	EPI-like	GGCT
PAK1	2.14853e-47	0.286008	0.956	0.786	4.99984e-43	EPI-like	PAK1
PAK1IP1	4.65178e-47	0.27224	0.958	0.762	1.08252e-42	EPI-like	PAK1IP1
EBPL	5.45418e-47	0.296804	0.931	0.815	1.26924e-42	EPI-like	EBPL
SMS	2.24928e-46	0.278939	0.998	0.937	5.23429e-42	EPI-like	SMS
ATP5H	2.31357e-46	0.252879	1	0.979	5.3839e-42	EPI-like	ATP5H
DNAJB6	3.78827e-46	0.292057	0.981	0.931	8.81569e-42	EPI-like	DNAJB6
UCHL1	4.78716e-46	0.295069	0.992	0.954	1.11402e-41	EPI-like	UCHL1
FXYD5	1.72954e-45	0.273145	0.838	0.595	4.02481e-41	EPI-like	FXYD5
TARS	3.37298e-44	0.282288	0.99	0.924	7.84926e-40	EPI-like	TARS
JMJD1C	4.44042e-44	0.26036	0.94	0.75	1.03333e-39	EPI-like	JMJD1C
FAM162A	5.71522e-44	0.273006	0.956	0.803	1.32999e-39	EPI-like	FAM162A
DSEL	1.33177e-43	0.267444	0.761	0.438	3.09916e-39	EPI-like	DSEL
PRDX6	6.3691e-43	0.272575	0.994	0.977	1.48215e-38	EPI-like	PRDX6
ZFP36L2	2.56281e-42	0.278414	0.865	0.648	5.96392e-38	EPI-like	ZFP36L2
DPYSL31	2.13871e-41	0.266041	0.875	0.62	4.97699e-37	EPI-like	DPYSL3
HMGN5	2.50738e-41	0.27363	0.975	0.869	5.83492e-37	EPI-like	HMGN5
C1QBP	3.14509e-40	0.278201	0.99	0.948	7.31893e-36	EPI-like	C1QBP
MIR302B1	7.13953e-40	0.554743	0.809	0.662	1.66144e-35	EPI-like	MIR302B
CNBP	6.22835e-39	0.274278	0.969	0.891	1.4494e-34	EPI-like	CNBP
RPL22L1	2.77329e-38	0.304807	0.99	0.891	6.45372e-34	EPI-like	RPL22L1
CRABP1	7.34209e-38	0.274358	0.946	0.804	1.70858e-33	EPI-like	CRABP1
CDKN3	2.05977e-37	0.273254	0.925	0.747	4.7933e-33	EPI-like	CDKN3
SCGB3A2	8.22716e-37	0.313711	0.692	0.429	1.91454e-32	EPI-like	SCGB3A2
EIF3E	1.06178e-36	0.260384	0.996	0.946	2.47087e-32	EPI-like	EIF3E
NCL	7.56876e-36	0.287651	1	1	1.76133e-31	EPI-like	NCL
FST1	6.62567e-34	0.271954	0.902	0.657	1.54186e-29	EPI-like	FST
CBR1	4.56582e-32	0.271428	0.721	0.486	1.06251e-27	EPI-like	CBR1
KDR	5.62275e-32	0.267612	0.83	0.569	1.30847e-27	EPI-like	KDR
CBS	5.09999e-27	0.273756	0.811	0.666	1.18682e-22	EPI-like	CBS
KIAA0020	6.4873e-24	0.257682	0.8	0.643	1.50966e-19	EPI-like	KIAA0020
RP11-426L16.8	1.37342e-13	0.289357	0.778	0.599	3.19608e-09	EPI-like	RP11-426L16.8
GAL	3.88501e-126	0.907302	1	0.954	9.04081e-122	Mesoderm-1	GAL
RP11-149I23.3	3.9573e-124	0.882987	0.875	0.386	9.20904e-120	Mesoderm-1	RP11-149I23.3
SERPINE2	7.205e-90	0.718435	0.989	0.863	1.67668e-85	Mesoderm-1	SERPINE2
T	8.25651e-85	0.411962	0.788	0.347	1.92137e-80	Mesoderm-1	T
MIXL1	1.65103e-77	0.510595	0.893	0.47	3.84212e-73	Mesoderm-1	MIXL1
LINC00458	1.98607e-67	0.636345	0.75	0.366	4.62179e-63	Mesoderm-1	LINC00458
CDA	7.00814e-65	0.398677	0.846	0.48	1.63086e-60	Mesoderm-1	CDA
RP11-1144P22.11	1.31084e-56	0.395116	0.982	0.672	3.05045e-52	Mesoderm-1	RP11-1144P22.1
NODAL1	1.42972e-56	0.4097	0.768	0.397	3.32711e-52	Mesoderm-1	NODAL
NEFM	1.91972e-54	0.411243	0.853	0.57	4.46738e-50	Mesoderm-1	NEFM
PDHB	4.4247e-54	0.343999	0.989	0.926	1.02967e-49	Mesoderm-1	PDHB
TUBB2B1	6.25128e-54	0.420418	0.996	0.962	1.45473e-49	Mesoderm-1	TUBB2B
TUBB2A1	1.42233e-51	0.461251	0.978	0.885	3.30989e-47	Mesoderm-1	TUBB2A
DDT	1.80994e-51	0.363766	1	0.981	4.21191e-47	Mesoderm-1	DDT
HEBP2	1.15242e-50	0.395784	0.987	0.921	2.6818e-46	Mesoderm-1	HEBP2
CCND2	4.47914e-48	0.398261	0.969	0.797	1.04234e-43	Mesoderm-1	CCND2
VAMP8	1.18718e-47	0.323157	0.978	0.9	2.7627e-43	Mesoderm-1	VAMP8
RP11-426L16.81	1.2466e-47	0.700551	0.777	0.602	2.90095e-43	Mesoderm-1	RP11-426L16.8
RPL22L11	3.35212e-47	0.372474	0.984	0.894	7.80072e-43	Mesoderm-1	RPL22L1
EOMES	1.0893e-42	0.290293	0.817	0.46	2.5349e-38	Mesoderm-1	EOMES
PLSCR1	1.5206e-40	0.288365	0.862	0.583	3.53858e-36	Mesoderm-1	PLSCR1
IER3	6.86197e-36	0.296862	0.839	0.57	1.59685e-31	Mesoderm-1	IER3
PCDH10	6.99302e-36	0.289508	0.743	0.418	1.62735e-31	Mesoderm-1	PCDH10
LARP7	8.26221e-35	0.34393	0.969	0.941	1.9227e-30	Mesoderm-1	LARP7
KDR1	5.98015e-32	0.270832	0.844	0.57	1.39164e-27	Mesoderm-1	KDR
FOXH1	3.27266e-30	0.267147	0.879	0.661	7.6158e-26	Mesoderm-1	FOXH1
ID31	4.44893e-30	0.332771	0.991	0.934	1.03531e-25	Mesoderm-1	ID3
DUT	7.78977e-30	0.262293	0.98	0.901	1.81276e-25	Mesoderm-1	DUT
CNTNAP21	8.68483e-30	0.284894	0.962	0.842	2.02105e-25	Mesoderm-1	CNTNAP2
TDGF11	6.78892e-25	0.250958	0.911	0.713	1.57985e-20	Mesoderm-1	TDGF1
MIR302B2	5.28487e-13	0.269841	0.777	0.672	1.22984e-08	Mesoderm-1	MIR302B
LZTS1	9.59287e-184	0.649432	0.763	0.149	2.23236e-179	Mesoderm-2	LZTS1
MESP1	1.32199e-180	1.33401	0.946	0.439	3.07641e-176	Mesoderm-2	MESP1
LHX1	1.93491e-179	0.987321	0.735	0.136	4.50272e-175	Mesoderm-2	LHX1
APLNR	1.82861e-176	1.00857	0.915	0.353	4.25536e-172	Mesoderm-2	APLNR
HAS2	4.8614e-151	0.92704	0.988	0.542	1.1313e-146	Mesoderm-2	HAS2
GATA6	6.14785e-149	0.458342	0.709	0.149	1.43067e-144	Mesoderm-2	GATA6
WNT5A	7.33801e-149	0.71366	0.723	0.166	1.70763e-144	Mesoderm-2	WNT5A
RSPO3	6.49065e-143	0.636805	0.73	0.17	1.51044e-138	Mesoderm-2	RSPO3
GRP	7.94824e-142	0.523094	0.474	0.046	1.84964e-137	Mesoderm-2	GRP
MIXL11	2.67094e-134	0.851539	0.941	0.464	6.21554e-130	Mesoderm-2	MIXL1
ARL4D	1.65343e-131	0.733359	0.796	0.322	3.84769e-127	Mesoderm-2	ARL4D
PDGFRA	4.16587e-131	0.381275	0.613	0.119	9.6944e-127	Mesoderm-2	PDGFRA
CER1	2.19046e-130	1.75275	0.808	0.334	5.09741e-126	Mesoderm-2	CER1
CNKSR3	4.3426e-129	0.535935	0.66	0.163	1.01057e-124	Mesoderm-2	CNKSR3
DLL3	8.48144e-119	0.482898	0.655	0.178	1.97372e-114	Mesoderm-2	DLL3
FAM24B	1.08656e-117	0.288028	0.359	0.025	2.52854e-113	Mesoderm-2	FAM24B
TBX6	1.55516e-114	0.361546	0.552	0.109	3.61902e-110	Mesoderm-2	TBX6
GATA6-AS1	3.48669e-110	0.304431	0.484	0.076	8.11388e-106	Mesoderm-2	GATA6-AS1
CALB1	4.93892e-110	0.726095	0.932	0.58	1.14933e-105	Mesoderm-2	CALB1
LIX11	2.99791e-109	0.590488	0.777	0.274	6.97645e-105	Mesoderm-2	LIX1
APOBEC3G	1.81671e-107	0.313161	0.516	0.099	4.22766e-103	Mesoderm-2	APOBEC3G
FOXC1	1.96536e-99	0.255634	0.406	0.055	4.57358e-95	Mesoderm-2	FOXC1
BMP2	1.41995e-97	0.310511	0.54	0.119	3.30437e-93	Mesoderm-2	BMP2
FABP5	5.68435e-96	0.797222	1	0.98	1.3228e-91	Mesoderm-2	FABP5
EIF3K	1.22896e-95	0.369015	1	0.997	2.85991e-91	Mesoderm-2	EIF3K
EOMES1	6.97825e-95	0.554931	0.873	0.452	1.62391e-90	Mesoderm-2	EOMES
RDX	2.05943e-92	0.50478	0.998	0.979	4.7925e-88	Mesoderm-2	RDX
LRRTM1	3.10427e-85	0.264661	0.455	0.097	7.22395e-81	Mesoderm-2	LRRTM1
DDX58	2.20768e-81	0.376983	0.62	0.209	5.13748e-77	Mesoderm-2	DDX58
FERMT2	5.10088e-81	0.489423	0.981	0.849	1.18703e-76	Mesoderm-2	FERMT2
HVCN1	7.81964e-79	0.317878	0.495	0.133	1.81971e-74	Mesoderm-2	HVCN1
PLXNA2	5.43561e-75	0.265349	0.587	0.182	1.26492e-70	Mesoderm-2	PLXNA2
SNAI1	3.13088e-73	0.291216	0.549	0.179	7.28587e-69	Mesoderm-2	SNAI1
FGF17	2.6937e-68	0.650717	0.629	0.267	6.2685e-64	Mesoderm-2	FGF17
MGST2	8.52602e-68	0.450025	0.854	0.551	1.98409e-63	Mesoderm-2	MGST2
NTS	1.0652e-67	0.712863	1	0.973	2.47883e-63	Mesoderm-2	NTS
C9orf3	2.88081e-66	0.296627	0.533	0.187	6.70394e-62	Mesoderm-2	C9orf3
PPP1R17	7.3325e-65	0.32086	0.516	0.167	1.70635e-60	Mesoderm-2	PPP1R17
IER31	3.76798e-64	0.45263	0.873	0.566	8.76848e-60	Mesoderm-2	IER3
COL5A2	5.25352e-64	0.332981	0.559	0.196	1.22255e-59	Mesoderm-2	COL5A2
CA2	6.97046e-64	0.543543	0.857	0.615	1.6221e-59	Mesoderm-2	CA2
HSPE1	1.44122e-63	0.311092	1	0.999	3.35387e-59	Mesoderm-2	HSPE1
HHEX	1.98417e-62	0.335936	0.43	0.12	4.61736e-58	Mesoderm-2	HHEX
FAM159B	1.73747e-57	0.377259	0.972	0.798	4.04326e-53	Mesoderm-2	FAM159B
ANP32B	1.96653e-57	0.357201	0.998	0.972	4.57632e-53	Mesoderm-2	ANP32B
SERPINE21	1.07861e-56	0.453654	0.988	0.864	2.51004e-52	Mesoderm-2	SERPINE2
GNAI1	1.5392e-56	0.307118	0.678	0.351	3.58187e-52	Mesoderm-2	GNAI1
H2AFY2	2.76758e-55	0.393531	0.951	0.811	6.44044e-51	Mesoderm-2	H2AFY2
DKK11	6.05128e-53	0.536796	0.538	0.213	1.40819e-48	Mesoderm-2	DKK1
DDT1	8.3097e-51	0.392591	0.998	0.982	1.93375e-46	Mesoderm-2	DDT
CENPW	2.95132e-49	0.295999	0.993	0.925	6.86803e-45	Mesoderm-2	CENPW
FOXH11	9.39601e-49	0.41592	0.873	0.664	2.18654e-44	Mesoderm-2	FOXH1
LRP10	3.27602e-48	0.250663	0.582	0.274	7.62363e-44	Mesoderm-2	LRP10
PA2G4	1.8473e-47	0.292997	0.998	0.99	4.29885e-43	Mesoderm-2	PA2G4
UBE2L3	9.01156e-47	0.253412	0.993	0.984	2.09708e-42	Mesoderm-2	UBE2L3
BNIP3	9.24631e-47	0.444326	0.852	0.625	2.15171e-42	Mesoderm-2	BNIP3
NDUFA6	8.01634e-46	0.275308	0.998	0.997	1.86548e-41	Mesoderm-2	NDUFA6
TXN	1.31323e-45	0.26333	0.998	0.992	3.05602e-41	Mesoderm-2	TXN
GNPNAT1	9.45093e-43	0.309551	0.819	0.575	2.19933e-38	Mesoderm-2	GNPNAT1
CDH2	1.65125e-42	0.307883	0.883	0.615	3.84263e-38	Mesoderm-2	CDH2
COL1A2	4.06126e-42	0.301465	0.721	0.427	9.45095e-38	Mesoderm-2	COL1A2
COCH	4.88771e-40	0.39503	0.798	0.605	1.13742e-35	Mesoderm-2	COCH
TDG	6.10979e-40	0.279479	0.988	0.956	1.42181e-35	Mesoderm-2	TDG
MFAP4	1.13828e-38	0.348333	0.69	0.426	2.64889e-34	Mesoderm-2	MFAP4
SLIRP	2.62865e-38	0.2962	1	1	6.11714e-34	Mesoderm-2	SLIRP
FAM13A	2.95522e-38	0.290644	0.587	0.306	6.87709e-34	Mesoderm-2	FAM13A
DDX21	5.38021e-38	0.292996	0.991	0.967	1.25203e-33	Mesoderm-2	DDX21
DNAJA1	5.35596e-37	0.265524	1	0.995	1.24638e-32	Mesoderm-2	DNAJA1
SPDL1	1.47391e-33	0.33778	0.937	0.812	3.42995e-29	Mesoderm-2	SPDL1
CHORDC1	2.60023e-33	0.282249	0.946	0.898	6.05099e-29	Mesoderm-2	CHORDC1
HSPH1	4.11578e-30	0.278656	0.958	0.899	9.57783e-26	Mesoderm-2	HSPH1
CYP26A1	1.66661e-29	0.466134	0.502	0.267	3.87838e-25	Mesoderm-2	CYP26A1
ZIC2	3.12625e-28	0.286244	0.702	0.49	7.27511e-24	Mesoderm-2	ZIC2
FADS1	4.57347e-28	0.252957	0.925	0.811	1.06429e-23	Mesoderm-2	FADS1
ASNS	1.08645e-26	0.265132	0.883	0.744	2.52827e-22	Mesoderm-2	ASNS
DUT1	7.38044e-24	0.268396	0.979	0.902	1.7175e-19	Mesoderm-2	DUT
DBF4	2.99241e-23	0.252989	0.892	0.796	6.96363e-19	Mesoderm-2	DBF4
CMAS	5.62376e-16	0.279341	0.857	0.775	1.30871e-11	Mesoderm-2	CMAS
RP11-148B6.1	1.15445e-05	0.378026	0.329	0.245	0.268651	Mesoderm-2	RP11-148B6.1
PUM3	0.000214227	0.265609	0.322	0.264	1	Mesoderm-2	PUM3
PPFIBP2	1.05232e-109	0.457523	0.675	0.093	2.44886e-105	Endoderm-1	PPFIBP2
FOXA2	2.53616e-79	0.29081	0.38	0.034	5.9019e-75	Endoderm-1	FOXA2
STMN2	4.73187e-74	0.372109	0.387	0.038	1.10115e-69	Endoderm-1	STMN2
S100Z	2.46291e-70	0.292831	0.429	0.052	5.73143e-66	Endoderm-1	S100Z
SOX17	3.15486e-70	1.04719	0.908	0.37	7.34169e-66	Endoderm-1	SOX17
FAM184A	7.69662e-64	0.914907	0.914	0.446	1.79108e-59	Endoderm-1	FAM184A
SERPINB9	1.3745e-59	0.948997	1	0.836	3.1986e-55	Endoderm-1	SERPINB9
ARHGAP24	1.01473e-57	0.356637	0.669	0.17	2.36139e-53	Endoderm-1	ARHGAP24
PRDM1	9.47497e-57	0.407211	0.681	0.182	2.20492e-52	Endoderm-1	PRDM1
MATN3	2.73142e-54	0.284003	0.466	0.089	6.35629e-50	Endoderm-1	MATN3
TMSB10	2.11282e-52	0.457479	1	1	4.91675e-48	Endoderm-1	TMSB10
NCOA4	1.26383e-49	0.631839	0.92	0.571	2.94106e-45	Endoderm-1	NCOA4
CDK6	1.43049e-37	0.382858	0.687	0.275	3.32889e-33	Endoderm-1	CDK6
RBMS1	1.49942e-37	0.502684	0.963	0.785	3.4893e-33	Endoderm-1	RBMS1
CLDN11	2.03579e-37	0.294123	0.46	0.118	4.73749e-33	Endoderm-1	CLDN11
BEX1	2.02543e-36	0.592046	0.982	0.864	4.71338e-32	Endoderm-1	BEX1
FABP51	1.52819e-35	0.715424	1	0.983	3.55624e-31	Endoderm-1	FABP5
FN1	9.47868e-34	0.648243	0.963	0.714	2.20578e-29	Endoderm-1	FN1
FSCN1	6.16275e-33	0.475355	0.994	0.949	1.43413e-28	Endoderm-1	FSCN1
CDH21	1.63318e-32	0.48287	0.933	0.642	3.80057e-28	Endoderm-1	CDH2
LBH	2.09729e-32	0.552879	0.951	0.69	4.8806e-28	Endoderm-1	LBH
MCC	2.51474e-32	0.357139	0.718	0.339	5.85205e-28	Endoderm-1	MCC
GLIPR2	2.62339e-32	0.363335	0.724	0.335	6.1049e-28	Endoderm-1	GLIPR2
GTF2I	3.50134e-32	0.513335	1	0.991	8.14796e-28	Endoderm-1	GTF2I
GNAL	6.41966e-32	0.483403	0.748	0.412	1.49392e-27	Endoderm-1	GNAL
PTGR1	1.95965e-31	0.574072	0.877	0.636	4.5603e-27	Endoderm-1	PTGR1
FAM159B1	5.02021e-31	0.424023	0.975	0.817	1.16825e-26	Endoderm-1	FAM159B
HAS21	8.29025e-31	0.503284	0.92	0.597	1.92922e-26	Endoderm-1	HAS2
COLEC12	1.41225e-30	0.330446	0.399	0.103	3.28645e-26	Endoderm-1	COLEC12
CALM3	2.46044e-30	0.371912	1	0.971	5.72569e-26	Endoderm-1	CALM3
TRIM24	9.46922e-30	0.476402	0.945	0.768	2.20358e-25	Endoderm-1	TRIM24
TMEM123	2.3453e-29	0.521231	0.939	0.82	5.45774e-25	Endoderm-1	TMEM123
SSBP3	4.07031e-29	0.440767	0.847	0.564	9.47201e-25	Endoderm-1	SSBP3
MGST21	5.29447e-29	0.397622	0.89	0.583	1.23208e-24	Endoderm-1	MGST2
QSER1	2.05438e-27	0.456738	0.896	0.676	4.78076e-23	Endoderm-1	QSER1
CAMKK2	4.79429e-27	0.320479	0.816	0.503	1.11568e-22	Endoderm-1	CAMKK2
GRB10	5.39422e-27	0.363657	0.589	0.269	1.25529e-22	Endoderm-1	GRB10
MANEA	6.46381e-27	0.2911	0.62	0.263	1.50419e-22	Endoderm-1	MANEA
NMU	2.53608e-26	0.493113	0.687	0.383	5.9017e-22	Endoderm-1	NMU
ITGA5	5.30341e-26	0.25544	0.571	0.244	1.23416e-21	Endoderm-1	ITGA5
KIF5B	1.03254e-24	0.39511	1	0.956	2.40282e-20	Endoderm-1	KIF5B
VRTN	6.42319e-24	0.383113	0.859	0.642	1.49474e-19	Endoderm-1	VRTN
COL6A1	9.98692e-24	0.357797	0.945	0.758	2.32406e-19	Endoderm-1	COL6A1
RBP1	2.21227e-23	0.392744	0.957	0.81	5.14818e-19	Endoderm-1	RBP1
HSD17B4	8.9491e-23	0.384703	0.963	0.91	2.08255e-18	Endoderm-1	HSD17B4
FGFBP31	7.51351e-22	0.456143	0.767	0.499	1.74847e-17	Endoderm-1	FGFBP3
MAP1B1	1.09783e-21	0.330203	1	0.969	2.55476e-17	Endoderm-1	MAP1B
MKRN1	1.93111e-21	0.378919	0.84	0.669	4.49389e-17	Endoderm-1	MKRN1
DHCR24	4.18416e-21	0.363378	0.951	0.875	9.73697e-17	Endoderm-1	DHCR24
PHACTR2	4.62902e-21	0.358214	0.871	0.638	1.07722e-16	Endoderm-1	PHACTR2
PKN2	9.77196e-21	0.387258	0.859	0.676	2.27403e-16	Endoderm-1	PKN2
APOC1	3.5024e-20	0.345853	0.994	0.939	8.15043e-16	Endoderm-1	APOC1
ITGB5	4.2966e-20	0.33739	0.822	0.66	9.99862e-16	Endoderm-1	ITGB5
FBN2	8.80091e-20	0.299004	0.828	0.543	2.04806e-15	Endoderm-1	FBN2
ANXA6	9.22454e-20	0.300644	0.761	0.522	2.14664e-15	Endoderm-1	ANXA6
PCDH101	1.7254e-19	0.331388	0.761	0.457	4.01518e-15	Endoderm-1	PCDH10
MFHAS1	7.23909e-19	0.329626	0.706	0.434	1.68461e-14	Endoderm-1	MFHAS1
SREK1IP1	7.89527e-19	0.291233	0.982	0.965	1.83731e-14	Endoderm-1	SREK1IP1
H2AFY21	1.07474e-18	0.344116	0.939	0.827	2.50103e-14	Endoderm-1	H2AFY2
GJA1	1.17677e-18	0.341599	0.994	0.979	2.73846e-14	Endoderm-1	GJA1
MARCKS	1.63885e-18	0.324307	0.988	0.92	3.81377e-14	Endoderm-1	MARCKS
LRRC23	2.95047e-18	0.25045	0.607	0.307	6.86605e-14	Endoderm-1	LRRC23
VIM1	3.91659e-18	0.299975	0.926	0.755	9.11429e-14	Endoderm-1	VIM
GATA61	4.0938e-18	0.250059	0.509	0.227	9.52667e-14	Endoderm-1	GATA6
MFAP41	1.00651e-17	0.461963	0.681	0.456	2.34226e-13	Endoderm-1	MFAP4
DYNLT3	1.81299e-17	0.257177	0.491	0.244	4.21901e-13	Endoderm-1	DYNLT3
SLC39A8	3.85988e-17	0.270519	0.828	0.573	8.98232e-13	Endoderm-1	SLC39A8
IFI16	4.89106e-16	0.262514	0.675	0.363	1.1382e-11	Endoderm-1	IFI16
FERMT21	1.25401e-15	0.283398	0.982	0.864	2.9182e-11	Endoderm-1	FERMT2
METAP2	4.0938e-15	0.258598	1	0.994	9.52667e-11	Endoderm-1	METAP2
ACVR2B	8.5713e-15	0.269414	0.834	0.641	1.99463e-10	Endoderm-1	ACVR2B
SPARC	9.73746e-15	0.288477	0.92	0.844	2.26601e-10	Endoderm-1	SPARC
PTAR1	9.89909e-15	0.254445	0.681	0.433	2.30362e-10	Endoderm-1	PTAR1
CENPE	1.16623e-14	0.475277	0.914	0.801	2.71394e-10	Endoderm-1	CENPE
SFPQ	3.40646e-14	0.264229	1	0.982	7.92718e-10	Endoderm-1	SFPQ
HMGCR	3.60337e-14	0.268123	0.896	0.743	8.38539e-10	Endoderm-1	HMGCR
GNAI2	3.93998e-14	0.260397	0.853	0.702	9.16873e-10	Endoderm-1	GNAI2
HSPH11	6.05784e-14	0.304825	0.957	0.906	1.40972e-09	Endoderm-1	HSPH1
SCD	6.17047e-14	0.296918	0.975	0.948	1.43593e-09	Endoderm-1	SCD
SPTBN1	1.63047e-13	0.262409	0.902	0.769	3.79426e-09	Endoderm-1	SPTBN1
SMAD5	2.31475e-13	0.256518	0.834	0.679	5.38666e-09	Endoderm-1	SMAD5
TPST2	2.52877e-13	0.258055	0.798	0.6	5.8847e-09	Endoderm-1	TPST2
FGFR11	2.91961e-13	0.300063	0.785	0.623	6.79422e-09	Endoderm-1	FGFR1
RCC2	7.91013e-13	0.26227	0.902	0.786	1.84077e-08	Endoderm-1	RCC2
ACO1	1.14691e-12	0.338962	0.73	0.596	2.66897e-08	Endoderm-1	ACO1
KPNB1	1.48638e-12	0.269923	0.988	0.969	3.45896e-08	Endoderm-1	KPNB1
GABARAPL1	1.90859e-12	0.309349	0.773	0.612	4.44149e-08	Endoderm-1	GABARAPL1
SOX11	2.09434e-12	0.287003	0.742	0.534	4.87374e-08	Endoderm-1	SOX11
FGD6	2.24365e-12	0.26747	0.589	0.392	5.22119e-08	Endoderm-1	FGD6
MRPL16	2.47798e-12	0.272718	0.902	0.824	5.7665e-08	Endoderm-1	MRPL16
SLF1	3.87058e-11	0.286014	0.307	0.135	9.00724e-07	Endoderm-1	SLF1
TCEA1	4.40745e-11	0.291415	0.994	0.98	1.02566e-06	Endoderm-1	TCEA1
UNC50	1.28396e-10	0.318465	0.706	0.622	2.9879e-06	Endoderm-1	UNC50
ACAP2	9.03351e-10	0.253344	0.73	0.618	2.10219e-05	Endoderm-1	ACAP2
PEG10	1.38658e-09	0.297421	0.933	0.867	3.22671e-05	Endoderm-1	PEG10
LINC00467	1.9602e-09	0.7355	0.362	0.219	4.56159e-05	Endoderm-1	LINC00467
UBE2S	2.2176e-09	0.253064	0.871	0.785	5.16059e-05	Endoderm-1	UBE2S
MKI67	4.21744e-09	0.2879	0.865	0.768	9.81441e-05	Endoderm-1	MKI67
EIF1B	2.20852e-07	0.30132	0.914	0.889	0.00513945	Endoderm-1	EIF1B
LINC01356	5.11436e-07	0.312866	0.35	0.188	0.0119016	Endoderm-1	LINC01356
TFAP2C	1.1202e-200	1.01074	0.931	0.249	2.60681e-196	Endoderm-2	TFAP2C
PDPN	7.68506e-167	1.52359	0.991	0.675	1.78839e-162	Endoderm-2	PDPN
NANOS3	5.85991e-163	0.547436	0.67	0.101	1.36366e-158	Endoderm-2	NANOS3
RAB15	6.07327e-140	0.777173	0.879	0.305	1.41331e-135	Endoderm-2	RAB15
WNT2	2.54224e-130	0.260375	0.359	0.017	5.91605e-126	Endoderm-2	WNT2
TCEA11	2.14165e-126	0.932278	1	0.978	4.98384e-122	Endoderm-2	TCEA1
CXCL14	2.90478e-126	1.08033	0.638	0.133	6.75972e-122	Endoderm-2	CXCL14
PIM2	3.34195e-126	0.87393	0.902	0.479	7.77705e-122	Endoderm-2	PIM2
IGF1	5.82598e-124	0.719418	0.477	0.055	1.35576e-119	Endoderm-2	IGF1
CXCR4	4.39269e-123	0.496094	0.592	0.106	1.02222e-118	Endoderm-2	CXCR4
PRKAR2B	1.09234e-121	0.661579	0.779	0.251	2.54197e-117	Endoderm-2	PRKAR2B
CEBPZ	2.81825e-120	0.796121	0.994	0.964	6.55835e-116	Endoderm-2	CEBPZ
NRK	4.79866e-118	0.548355	0.601	0.11	1.1167e-113	Endoderm-2	NRK
PCSK1N	1.26017e-114	0.637432	0.664	0.174	2.93254e-110	Endoderm-2	PCSK1N
PRDM11	5.55431e-114	0.464037	0.661	0.142	1.29254e-109	Endoderm-2	PRDM1
LBH1	1.71171e-113	1.02413	0.971	0.664	3.98333e-109	Endoderm-2	LBH
IFI161	3.9251e-113	0.652034	0.856	0.307	9.1341e-109	Endoderm-2	IFI16
GMPR	7.43342e-110	0.621345	0.69	0.214	1.72983e-105	Endoderm-2	GMPR
RAB3B	1.60125e-107	0.874522	0.951	0.598	3.72627e-103	Endoderm-2	RAB3B
ASRGL1	1.74992e-107	0.75224	0.879	0.493	4.07224e-103	Endoderm-2	ASRGL1
SOX171	2.37145e-104	0.724391	0.853	0.332	5.5186e-100	Endoderm-2	SOX17
NDUFAB1	8.63107e-103	0.585044	0.997	0.988	2.00854e-98	Endoderm-2	NDUFAB1
OVOS2	5.80913e-96	0.523245	0.342	0.031	1.35184e-91	Endoderm-2	OVOS2
GLIPR21	1.42875e-94	0.628015	0.747	0.297	3.32484e-90	Endoderm-2	GLIPR2
GSTP1	3.45864e-93	0.348113	1	1	8.0486e-89	Endoderm-2	GSTP1
LRRC231	1.00842e-92	0.517412	0.727	0.261	2.3467e-88	Endoderm-2	LRRC23
PLBD1	1.0934e-92	0.753568	0.802	0.403	2.54446e-88	Endoderm-2	PLBD1
SOCS4	3.78864e-89	0.771358	0.92	0.565	8.81655e-85	Endoderm-2	SOCS4
B3GNT2	3.73702e-87	0.561278	0.865	0.488	8.69642e-83	Endoderm-2	B3GNT2
SLC4A8	6.04715e-87	0.38419	0.621	0.167	1.40723e-82	Endoderm-2	SLC4A8
NANOG	1.16612e-86	0.695829	0.865	0.454	2.71369e-82	Endoderm-2	NANOG
ERMN	2.37237e-85	0.258843	0.374	0.047	5.52074e-81	Endoderm-2	ERMN
CACNA2D2	5.84904e-84	0.288541	0.434	0.075	1.36113e-79	Endoderm-2	CACNA2D2
PYCARD	1.12461e-79	0.654104	0.931	0.763	2.61709e-75	Endoderm-2	PYCARD
PTMA	3.96132e-75	0.337594	1	1	9.21838e-71	Endoderm-2	PTMA
MKRN11	5.76815e-74	0.526576	0.885	0.647	1.34231e-69	Endoderm-2	MKRN1
DBI	5.75484e-71	0.280905	1	1	1.33921e-66	Endoderm-2	DBI
KIF5B1	5.60465e-67	0.52993	0.986	0.954	1.30426e-62	Endoderm-2	KIF5B
MMP2	4.86044e-66	0.469134	0.799	0.46	1.13107e-61	Endoderm-2	MMP2
BICD1	1.63468e-65	0.507089	0.802	0.466	3.80407e-61	Endoderm-2	BICD1
SLC16A10	7.85826e-65	0.291429	0.437	0.104	1.8287e-60	Endoderm-2	SLC16A10
PLPP1	3.11434e-64	0.411264	0.342	0.061	7.24737e-60	Endoderm-2	PLPP1
SPSB2	2.0512e-62	0.383487	0.672	0.316	4.77335e-58	Endoderm-2	SPSB2
EPCAM	3.39504e-62	0.492141	0.989	0.899	7.90059e-58	Endoderm-2	EPCAM
CRHBP	4.27284e-62	0.280518	0.31	0.047	9.94333e-58	Endoderm-2	CRHBP
NKX1-2	8.29319e-62	0.419615	0.351	0.066	1.92991e-57	Endoderm-2	NKX1-2
COL4A3BP	1.29233e-61	0.495577	0.902	0.689	3.00739e-57	Endoderm-2	COL4A3BP
PTAR11	1.00121e-58	0.45262	0.739	0.402	2.32991e-54	Endoderm-2	PTAR1
SLC7A8	1.54242e-58	0.488484	0.882	0.604	3.58937e-54	Endoderm-2	SLC7A8
USP28	3.56326e-58	0.425803	0.81	0.531	8.29207e-54	Endoderm-2	USP28
NEB	5.15801e-58	0.33425	0.348	0.07	1.20032e-53	Endoderm-2	NEB
POU5F11	8.97009e-58	0.409264	1	0.98	2.08743e-53	Endoderm-2	POU5F1
ELOVL6	1.40992e-56	0.460769	0.911	0.71	3.28103e-52	Endoderm-2	ELOVL6
SDC2	1.8639e-56	0.444629	0.839	0.611	4.33747e-52	Endoderm-2	SDC2
TMSB4X	1.79327e-53	0.327527	1	1	4.17312e-49	Endoderm-2	TMSB4X
CCPG1	3.23186e-53	0.47943	0.77	0.496	7.52086e-49	Endoderm-2	CCPG1
WASL	1.08983e-52	0.446543	0.813	0.563	2.53614e-48	Endoderm-2	WASL
SNAPC1	1.35988e-52	0.411384	0.79	0.551	3.16457e-48	Endoderm-2	SNAPC1
ITGA6	2.08245e-52	0.489172	0.716	0.377	4.84606e-48	Endoderm-2	ITGA6
LPAR4	2.87738e-51	0.360577	0.523	0.204	6.69596e-47	Endoderm-2	LPAR4
EFEMP1	2.26411e-49	0.272681	0.563	0.232	5.26881e-45	Endoderm-2	EFEMP1
PIFO	6.72706e-48	0.288166	0.489	0.176	1.56545e-43	Endoderm-2	PIFO
FGF13	6.1352e-47	0.347654	0.641	0.315	1.42772e-42	Endoderm-2	FGF13
GSTA4	2.13732e-46	0.332027	0.713	0.435	4.97376e-42	Endoderm-2	GSTA4
PEG101	7.76838e-46	0.896562	0.963	0.857	1.80778e-41	Endoderm-2	PEG10
STOM	8.23309e-46	0.350879	0.796	0.455	1.91592e-41	Endoderm-2	STOM
NRCAM	1.68465e-45	0.252028	0.339	0.084	3.92034e-41	Endoderm-2	NRCAM
LRAT	2.18249e-45	0.258173	0.445	0.152	5.07886e-41	Endoderm-2	LRAT
WDHD1	2.27119e-45	0.381985	0.836	0.595	5.28529e-41	Endoderm-2	WDHD1
PRTG1	3.0123e-45	0.573439	0.937	0.628	7.00991e-41	Endoderm-2	PRTG
OAT	3.40284e-45	0.352585	0.868	0.73	7.91875e-41	Endoderm-2	OAT
PGM1	9.14181e-45	0.493281	0.859	0.703	2.12739e-40	Endoderm-2	PGM1
PPP1R3B	2.38139e-44	0.368661	0.784	0.531	5.54174e-40	Endoderm-2	PPP1R3B
MAP1B2	8.16356e-44	0.376781	0.994	0.968	1.89974e-39	Endoderm-2	MAP1B
GTF2I1	1.32871e-43	0.441261	0.994	0.991	3.09203e-39	Endoderm-2	GTF2I
TMEM1231	6.14856e-43	0.423375	0.922	0.812	1.43083e-38	Endoderm-2	TMEM123
PYDC1	1.49511e-42	0.430051	0.48	0.194	3.47927e-38	Endoderm-2	PYDC1
TRIM2	1.7291e-42	0.293994	0.618	0.308	4.02378e-38	Endoderm-2	TRIM2
SAT11	5.53062e-42	0.686416	0.859	0.746	1.28703e-37	Endoderm-2	SAT1
TUBA1A1	1.11294e-41	0.410478	0.997	0.969	2.58991e-37	Endoderm-2	TUBA1A
AHNAK	1.23388e-40	0.293889	0.664	0.315	2.87137e-36	Endoderm-2	AHNAK
HPGD	3.87864e-40	0.40316	0.655	0.324	9.02598e-36	Endoderm-2	HPGD
TFAP2A	7.08937e-40	0.329771	0.753	0.422	1.64977e-35	Endoderm-2	TFAP2A
COMT	4.75601e-39	0.3681	0.713	0.484	1.10677e-34	Endoderm-2	COMT
PDCD2	5.59789e-39	0.41534	0.897	0.83	1.30269e-34	Endoderm-2	PDCD2
RBMS11	7.09595e-38	0.347971	0.911	0.779	1.6513e-33	Endoderm-2	RBMS1
DMD	2.87314e-37	0.37697	0.552	0.269	6.68609e-33	Endoderm-2	DMD
SGK1	8.82949e-37	0.250524	0.44	0.162	2.05471e-32	Endoderm-2	SGK1
SACS	1.28087e-36	0.473675	0.744	0.476	2.98072e-32	Endoderm-2	SACS
RNF187	2.33023e-36	0.362039	0.862	0.777	5.42267e-32	Endoderm-2	RNF187
LY6E	3.07435e-36	0.352499	0.943	0.863	7.15432e-32	Endoderm-2	LY6E
ENO2	3.20827e-36	0.296329	0.612	0.352	7.46595e-32	Endoderm-2	ENO2
FNBP1L	6.96784e-36	0.386998	0.983	0.929	1.62149e-31	Endoderm-2	FNBP1L
ETV5	1.79742e-35	0.261576	0.67	0.385	4.18279e-31	Endoderm-2	ETV5
RP11-85G21.3	1.01707e-34	0.353666	0.397	0.138	2.36683e-30	Endoderm-2	RP11-85G21.3
ARMT1	3.53271e-34	0.602115	0.397	0.16	8.22096e-30	Endoderm-2	ARMT1
SEMA6A	7.96134e-34	0.369276	0.92	0.747	1.85268e-29	Endoderm-2	SEMA6A
TMEM14A	2.10703e-32	0.281068	0.644	0.421	4.90328e-28	Endoderm-2	TMEM14A
FAM169A	3.32312e-32	0.290873	0.687	0.437	7.73323e-28	Endoderm-2	FAM169A
PRRC2B	1.26823e-31	0.381553	0.81	0.62	2.95131e-27	Endoderm-2	PRRC2B
DDIT41	1.89393e-31	0.276019	0.661	0.41	4.40737e-27	Endoderm-2	DDIT4
PQBP1	3.74963e-31	0.310673	0.828	0.715	8.72577e-27	Endoderm-2	PQBP1
CDCA7	4.90622e-31	0.306799	0.759	0.558	1.14173e-26	Endoderm-2	CDCA7
DPYSL2	3.49596e-30	0.336722	0.917	0.818	8.13545e-26	Endoderm-2	DPYSL2
PCAT14	8.88393e-30	1.00902	0.394	0.162	2.06738e-25	Endoderm-2	PCAT14
BASP1	1.3291e-29	0.391812	0.908	0.833	3.09295e-25	Endoderm-2	BASP1
PXDN	2.00225e-29	0.320485	0.744	0.525	4.65944e-25	Endoderm-2	PXDN
QDPR	2.29856e-29	0.299819	0.721	0.556	5.34897e-25	Endoderm-2	QDPR
LUC7L3	5.19562e-29	0.263487	0.983	0.978	1.20907e-24	Endoderm-2	LUC7L3
EMB	1.00642e-28	0.338066	0.655	0.439	2.34205e-24	Endoderm-2	EMB
BRWD3	1.60263e-28	0.268049	0.647	0.396	3.72949e-24	Endoderm-2	BRWD3
PPAP2A	5.68266e-28	0.502527	0.534	0.355	1.32241e-23	Endoderm-2	PPAP2A
NCOA41	8.42195e-28	0.298489	0.756	0.567	1.95987e-23	Endoderm-2	NCOA4
RNF19A	8.58315e-28	0.275894	0.603	0.346	1.99739e-23	Endoderm-2	RNF19A
VKORC1	2.03003e-27	0.256109	0.925	0.874	4.72408e-23	Endoderm-2	VKORC1
PNP	3.60699e-27	0.294429	0.81	0.639	8.39383e-23	Endoderm-2	PNP
IL6ST	4.62264e-27	0.292262	0.431	0.198	1.07573e-22	Endoderm-2	IL6ST
ADAMTS19	9.31545e-27	0.26981	0.583	0.351	2.1678e-22	Endoderm-2	ADAMTS19
FAM184A1	1.17394e-26	0.383725	0.687	0.443	2.73187e-22	Endoderm-2	FAM184A
UXS1	1.30196e-26	0.264598	0.721	0.535	3.02978e-22	Endoderm-2	UXS1
SPTBN11	3.47839e-26	0.333562	0.879	0.762	8.09455e-22	Endoderm-2	SPTBN1
CERS6	6.02369e-26	0.283248	0.572	0.331	1.40177e-21	Endoderm-2	CERS6
CRYM	4.22775e-25	0.262183	0.463	0.234	9.8384e-21	Endoderm-2	CRYM
ESRP1	8.06986e-25	0.276574	0.73	0.543	1.87794e-20	Endoderm-2	ESRP1
DHTKD1	2.69485e-24	0.250351	0.632	0.434	6.27118e-20	Endoderm-2	DHTKD1
MYO101	2.74587e-24	0.300721	0.931	0.781	6.38991e-20	Endoderm-2	MYO10
SCD1	9.39054e-24	0.370658	0.971	0.946	2.18527e-19	Endoderm-2	SCD
FAM159B2	1.88426e-23	0.289766	0.922	0.812	4.38487e-19	Endoderm-2	FAM159B
ANKRD11	3.02262e-23	0.28573	0.899	0.819	7.03393e-19	Endoderm-2	ANKRD11
DSP	3.05534e-23	0.265888	0.931	0.841	7.11009e-19	Endoderm-2	DSP
ACLY	3.49822e-23	0.309999	0.922	0.839	8.14072e-19	Endoderm-2	ACLY
APP	5.66538e-23	0.278985	0.94	0.909	1.31839e-18	Endoderm-2	APP
FAM222B	6.78159e-23	0.261246	0.603	0.405	1.57814e-18	Endoderm-2	FAM222B
PPP1R12A	9.16076e-23	0.272811	0.951	0.907	2.1318e-18	Endoderm-2	PPP1R12A
HSPB11	2.10164e-22	0.298817	0.891	0.835	4.89072e-18	Endoderm-2	HSPB11
UQCRC1	8.99854e-22	0.25046	0.94	0.914	2.09405e-17	Endoderm-2	UQCRC1
FRYL	1.40935e-21	0.299554	0.589	0.389	3.2797e-17	Endoderm-2	FRYL
DSG2	1.76916e-21	0.270813	0.828	0.69	4.11702e-17	Endoderm-2	DSG2
TUBGCP2	1.94358e-21	0.264813	0.724	0.551	4.52291e-17	Endoderm-2	TUBGCP2
TXNDC12	1.98029e-21	0.296855	0.819	0.787	4.60834e-17	Endoderm-2	TXNDC12
REST	3.0919e-21	0.312177	0.902	0.849	7.19517e-17	Endoderm-2	REST
PNPLA8	5.51283e-21	0.260953	0.638	0.451	1.28289e-16	Endoderm-2	PNPLA8
PCDH7	1.65177e-20	0.258069	0.497	0.274	3.84384e-16	Endoderm-2	PCDH7
EIF2AK2	1.67119e-20	0.283398	0.764	0.644	3.88902e-16	Endoderm-2	EIF2AK2
CD91	5.68339e-20	0.297738	0.862	0.754	1.32258e-15	Endoderm-2	CD9
PRDX4	6.96466e-20	0.289664	0.96	0.939	1.62075e-15	Endoderm-2	PRDX4
NCKAP1	1.00614e-19	0.291807	0.83	0.751	2.34138e-15	Endoderm-2	NCKAP1
PTPN12	1.1328e-19	0.28475	0.764	0.63	2.63615e-15	Endoderm-2	PTPN12
PDHB1	1.15777e-19	0.276765	0.96	0.934	2.69424e-15	Endoderm-2	PDHB
YWHAZ	5.07989e-19	0.254011	0.997	0.988	1.18214e-14	Endoderm-2	YWHAZ
MRS2	1.2518e-18	0.293201	0.793	0.674	2.91305e-14	Endoderm-2	MRS2
TTC3	1.34833e-18	0.262092	0.83	0.688	3.1377e-14	Endoderm-2	TTC3
HMGCR1	1.74348e-18	0.264538	0.853	0.737	4.05726e-14	Endoderm-2	HMGCR
LIN28A	1.0657e-17	0.338377	0.971	0.955	2.47998e-13	Endoderm-2	LIN28A
ITGB51	1.55473e-17	0.268496	0.79	0.651	3.61802e-13	Endoderm-2	ITGB5
ACO11	1.95736e-17	0.326673	0.716	0.586	4.55497e-13	Endoderm-2	ACO1
DLGAP5	5.67393e-17	0.363435	0.925	0.852	1.32038e-12	Endoderm-2	DLGAP5
DST	9.29989e-17	0.310401	0.842	0.748	2.16418e-12	Endoderm-2	DST
EPB41L2	3.71714e-16	0.331617	0.911	0.866	8.65015e-12	Endoderm-2	EPB41L2
B2M	7.55888e-15	0.253263	0.928	0.915	1.75903e-10	Endoderm-2	B2M
SFRP21	1.98046e-14	0.294372	0.951	0.875	4.60873e-10	Endoderm-2	SFRP2
SYNE2	5.2037e-12	0.257561	0.839	0.772	1.21095e-07	Endoderm-2	SYNE2
NRDC	1.72401e-10	0.319983	0.417	0.264	4.01194e-06	Endoderm-2	NRDC
NDUFB8	1.15131e-09	0.29303	0.437	0.278	2.67922e-05	Endoderm-2	NDUFB8
UQCR11	3.29576e-08	0.278658	0.437	0.28	0.000766957	Endoderm-2	UQCR11
C6orf211	7.87592e-05	0.263427	0.523	0.576	1	Endoderm-2	C6orf211
RPS17	0.000205907	0.370447	0.73	0.692	1	Endoderm-2	RPS17
SLC8A1	3.99929e-305	1.09708	0.821	0.051	9.30674e-301	ExE-like	SLC8A1
GABRP	4.01541e-224	0.959471	0.783	0.101	9.34427e-220	ExE-like	GABRP
EPAS1	9.10834e-221	1.48391	0.92	0.202	2.1196e-216	ExE-like	EPAS1
ISL1	1.25629e-216	1.305	0.967	0.244	2.92352e-212	ExE-like	ISL1
TRIML2	1.19309e-210	1.58843	0.964	0.307	2.77643e-206	ExE-like	TRIML2
PPARG	8.28547e-204	0.451691	0.539	0.024	1.92811e-199	ExE-like	PPARG
DIO3	6.49214e-201	1.22298	0.857	0.186	1.51079e-196	ExE-like	DIO3
C8orf4	7.91739e-200	1.371	0.75	0.113	1.84246e-195	ExE-like	C8orf4
IGFBP3	2.27511e-198	1.98473	0.89	0.22	5.29441e-194	ExE-like	IGFBP3
ENPEP	1.88445e-195	0.407089	0.557	0.032	4.38531e-191	ExE-like	ENPEP
WNT6	2.14122e-191	0.342054	0.518	0.025	4.98282e-187	ExE-like	WNT6
SPNS2	2.13212e-190	0.357944	0.497	0.02	4.96165e-186	ExE-like	SPNS2
CTSV	7.67855e-183	2.30119	1	0.901	1.78687e-178	ExE-like	CTSV
MEIS2	2.50379e-180	0.635174	0.667	0.079	5.82658e-176	ExE-like	MEIS2
TPM1	7.62734e-179	1.56854	1	0.983	1.77496e-174	ExE-like	TPM1
GATA3	3.95945e-175	0.995734	0.926	0.274	9.21404e-171	ExE-like	GATA3
EFNA1	6.23875e-173	0.761916	0.798	0.178	1.45182e-168	ExE-like	EFNA1
WLS	9.58588e-173	1.5462	1	0.602	2.23073e-168	ExE-like	WLS
DBI1	5.11643e-170	1.37227	1	1	1.19064e-165	ExE-like	DBI
ANKRD1	7.42274e-170	0.923265	0.5	0.031	1.72735e-165	ExE-like	ANKRD1
KRT19	9.00692e-170	1.93479	0.994	0.906	2.096e-165	ExE-like	KRT19
HAND1	1.78984e-167	1.67079	0.961	0.464	4.16514e-163	ExE-like	HAND1
KRT8	2.61176e-167	1.57172	1	0.948	6.07782e-163	ExE-like	KRT8
TMEM54	2.71582e-167	0.97324	0.905	0.329	6.31999e-163	ExE-like	TMEM54
DOK4	3.25454e-161	1.15412	0.914	0.358	7.57365e-157	ExE-like	DOK4
ATP2B11	1.14402e-160	1.32892	0.994	0.803	2.66224e-156	ExE-like	ATP2B1
CALM2	1.38134e-159	1.22388	1	0.999	3.21451e-155	ExE-like	CALM2
MALAT11	7.24373e-159	1.53317	1	1	1.68569e-154	ExE-like	MALAT1
RGS51	6.24566e-158	1.08004	0.887	0.281	1.45343e-153	ExE-like	RGS5
P2RY6	2.17323e-157	0.286476	0.438	0.022	5.05732e-153	ExE-like	P2RY6
EZR	1.66744e-156	1.14011	0.994	0.909	3.8803e-152	ExE-like	EZR
EPCAM1	2.53086e-155	1.14617	1	0.898	5.88958e-151	ExE-like	EPCAM
TRIM55	3.82162e-155	0.383782	0.435	0.022	8.89329e-151	ExE-like	TRIM55
ANXA3	4.38331e-154	0.864767	0.842	0.266	1.02004e-149	ExE-like	ANXA3
PALLD	3.52147e-152	0.895129	0.887	0.291	8.19481e-148	ExE-like	PALLD
LCP1	9.28998e-152	0.726178	0.533	0.051	2.16187e-147	ExE-like	LCP1
ZFHX3	8.08215e-150	0.444371	0.536	0.053	1.8808e-145	ExE-like	ZFHX3
AMOT	1.35872e-149	0.433404	0.577	0.067	3.16187e-145	ExE-like	AMOT
SESN31	1.25827e-145	1.12555	0.917	0.359	2.92813e-141	ExE-like	SESN3
DSTN	7.08741e-145	0.829374	1	0.993	1.64931e-140	ExE-like	DSTN
KRT18	6.42419e-143	1.46195	0.997	0.961	1.49497e-138	ExE-like	KRT18
STOM1	8.54957e-143	0.885916	0.935	0.435	1.98957e-138	ExE-like	STOM
ADAMTS18	6.93999e-142	0.352107	0.458	0.034	1.615e-137	ExE-like	ADAMTS18
C1orf105	1.25525e-139	0.394395	0.473	0.04	2.9211e-135	ExE-like	C1orf105
KALRN	1.49405e-139	0.524991	0.696	0.134	3.4768e-135	ExE-like	KALRN
SMTNL2	4.34891e-137	0.416539	0.565	0.079	1.01203e-132	ExE-like	SMTNL2
AHNAK1	9.62291e-136	0.99811	0.875	0.284	2.23935e-131	ExE-like	AHNAK
MDK1	2.40962e-135	0.776504	1	0.997	5.60742e-131	ExE-like	MDK
ITM2B	1.70081e-134	0.959639	0.997	0.954	3.95795e-130	ExE-like	ITM2B
HOXB6	1.08051e-133	0.610273	0.574	0.082	2.51445e-129	ExE-like	HOXB6
KRT7	2.01941e-133	0.671934	0.604	0.103	4.69938e-129	ExE-like	KRT7
CEBPA	2.31627e-133	0.255443	0.39	0.022	5.39019e-129	ExE-like	CEBPA
TAGLN2	1.40191e-132	1.04584	0.955	0.779	3.26239e-128	ExE-like	TAGLN2
ABCG2	4.90908e-132	0.51531	0.688	0.147	1.14239e-127	ExE-like	ABCG2
BAMBI	6.37435e-132	1.22594	0.967	0.755	1.48337e-127	ExE-like	BAMBI
TBCA	1.99125e-130	0.835042	1	0.999	4.63384e-126	ExE-like	TBCA
HOXB2	3.82177e-130	0.403577	0.491	0.053	8.89364e-126	ExE-like	HOXB2
GCLM	2.51969e-129	0.850545	0.83	0.329	5.86358e-125	ExE-like	GCLM
IGFBP71	8.90927e-129	0.790855	0.744	0.194	2.07328e-124	ExE-like	IGFBP7
SLC2A3	3.27901e-128	1.02618	0.988	0.806	7.63059e-124	ExE-like	SLC2A3
LY6E1	3.32446e-128	0.944136	0.985	0.856	7.73636e-124	ExE-like	LY6E
MESDC2	7.95888e-127	0.860906	0.988	0.928	1.85211e-122	ExE-like	MESDC2
RARRES2	1.70119e-126	0.962523	0.985	0.909	3.95884e-122	ExE-like	RARRES2
SMARCA2	2.14852e-125	0.604368	0.708	0.166	4.99982e-121	ExE-like	SMARCA2
ARHGAP29	5.14618e-124	0.96088	0.935	0.53	1.19757e-119	ExE-like	ARHGAP29
SOCS3	3.27308e-123	0.395162	0.565	0.091	7.61678e-119	ExE-like	SOCS3
MEIS1	1.89948e-122	0.309978	0.435	0.04	4.42028e-118	ExE-like	MEIS1
GRHL1	2.4595e-121	0.35193	0.479	0.055	5.7235e-117	ExE-like	GRHL1
NEAT1	3.52173e-121	1.06758	0.878	0.363	8.19543e-117	ExE-like	NEAT1
DLX51	7.93107e-121	0.755083	0.673	0.153	1.84564e-116	ExE-like	DLX5
MSX2	6.95177e-119	0.992913	0.896	0.505	1.61775e-114	ExE-like	MSX2
YPEL2	1.07242e-118	0.437472	0.619	0.119	2.49564e-114	ExE-like	YPEL2
ACKR3	1.31026e-116	0.26323	0.426	0.041	3.0491e-112	ExE-like	ACKR3
HAPLN11	9.32492e-116	0.962493	0.908	0.427	2.17e-111	ExE-like	HAPLN1
LRRN1	1.46595e-115	0.794596	0.89	0.406	3.41142e-111	ExE-like	LRRN1
S100A11	6.31879e-115	0.890499	1	0.999	1.47044e-110	ExE-like	S100A11
RHOBTB3	7.48942e-115	0.971325	0.964	0.665	1.74286e-110	ExE-like	RHOBTB3
HPGD1	9.24968e-115	1.08988	0.815	0.301	2.15249e-110	ExE-like	HPGD
HOXB-AS1	1.82321e-114	0.263392	0.351	0.022	4.24279e-110	ExE-like	HOXB-AS1
ANXA2	1.69538e-113	1.05366	0.961	0.815	3.94533e-109	ExE-like	ANXA2
ZMAT4	6.52235e-113	0.340549	0.509	0.075	1.51782e-108	ExE-like	ZMAT4
ID21	3.43514e-111	0.933341	0.985	0.892	7.99392e-107	ExE-like	ID2
NPC2	9.31655e-111	0.690721	0.985	0.97	2.16805e-106	ExE-like	NPC2
TBX3	2.4126e-110	0.911201	0.946	0.447	5.61436e-106	ExE-like	TBX3
MAFB	4.41274e-110	0.447608	0.574	0.11	1.02689e-105	ExE-like	MAFB
FAM65B	1.12132e-109	0.299843	0.369	0.029	2.60942e-105	ExE-like	FAM65B
RHOB	3.51881e-109	0.615592	0.756	0.266	8.18863e-105	ExE-like	RHOB
AIF1L	1.08553e-108	0.719735	0.961	0.834	2.52615e-104	ExE-like	AIF1L
GAS1	8.82443e-106	0.417864	0.574	0.112	2.05353e-101	ExE-like	GAS1
MYL6	2.19651e-105	0.441773	1	1	5.1115e-101	ExE-like	MYL6
CDH1	9.47985e-105	1.00914	0.952	0.637	2.20606e-100	ExE-like	CDH1
ID1	9.38515e-104	0.916203	1	0.948	2.18402e-99	ExE-like	ID1
CALD1	2.60316e-103	0.837137	0.997	0.989	6.05782e-99	ExE-like	CALD1
GSTO1	4.35369e-103	0.717606	0.994	0.956	1.01315e-98	ExE-like	GSTO1
CAMK2N1	5.02861e-103	0.480894	0.679	0.183	1.17021e-98	ExE-like	CAMK2N1
ALDH1A2	4.47194e-102	0.264827	0.289	0.014	1.04066e-97	ExE-like	ALDH1A2
LYPD6B	6.95884e-102	0.404495	0.571	0.118	1.61939e-97	ExE-like	LYPD6B
C16orf87	7.81701e-102	0.692282	0.949	0.748	1.8191e-97	ExE-like	C16orf87
CTSL	1.20399e-101	0.851846	0.869	0.465	2.8018e-97	ExE-like	CTSL
SPARCL1	1.98164e-101	1.0485	0.503	0.086	4.61147e-97	ExE-like	SPARCL1
TSC22D1	2.39351e-100	0.877897	0.955	0.837	5.56993e-96	ExE-like	TSC22D1
AFAP1L2	4.7932e-100	0.252115	0.411	0.049	1.11543e-95	ExE-like	AFAP1L2
ERRFI1	8.33837e-100	0.587936	0.78	0.291	1.94042e-95	ExE-like	ERRFI1
TFAP2A1	3.07133e-96	0.603079	0.857	0.407	7.14728e-92	ExE-like	TFAP2A
ACTC11	2.07428e-94	1.57751	0.878	0.605	4.82705e-90	ExE-like	ACTC1
UBASH3B	6.52734e-93	0.326277	0.473	0.081	1.51898e-88	ExE-like	UBASH3B
PLA2G2A	6.98729e-93	1.33041	0.756	0.312	1.62601e-88	ExE-like	PLA2G2A
MYL9	1.67666e-92	0.799254	0.917	0.708	3.90175e-88	ExE-like	MYL9
KCNK12	5.03285e-91	0.343917	0.557	0.125	1.17119e-86	ExE-like	KCNK12
SHD	8.35157e-91	0.289117	0.488	0.09	1.94349e-86	ExE-like	SHD
OLFML3	9.70392e-90	0.682225	0.899	0.592	2.2582e-85	ExE-like	OLFML3
PRLR	1.63097e-89	0.471398	0.548	0.12	3.79542e-85	ExE-like	PRLR
CXCL12	4.10197e-89	0.704052	0.729	0.308	9.54569e-85	ExE-like	CXCL12
ANXA4	1.37151e-88	0.501737	0.61	0.18	3.19164e-84	ExE-like	ANXA4
CLDN6	1.44054e-88	0.626482	0.988	0.92	3.35228e-84	ExE-like	CLDN6
S100A10	7.30187e-88	0.961451	0.932	0.784	1.69922e-83	ExE-like	S100A10
KIAA1217	8.21897e-88	0.535893	0.574	0.143	1.91264e-83	ExE-like	KIAA1217
GATA3-AS1	2.62233e-87	0.31277	0.446	0.075	6.10243e-83	ExE-like	GATA3-AS1
CD99	3.26854e-87	0.593522	0.949	0.79	7.60622e-83	ExE-like	CD99
ADAMTS9	9.34427e-87	0.445982	0.604	0.151	2.1745e-82	ExE-like	ADAMTS9
LINC00936	1.09472e-86	0.258698	0.378	0.049	2.54752e-82	ExE-like	LINC00936
HSPB1	8.00394e-86	0.651595	0.997	0.99	1.8626e-81	ExE-like	HSPB1
NUDT4	2.09108e-84	0.615198	0.884	0.585	4.86616e-80	ExE-like	NUDT4
MAGI3	2.57938e-83	0.513534	0.64	0.201	6.00249e-79	ExE-like	MAGI3
TMEM37	3.12443e-83	0.49881	0.649	0.229	7.27085e-79	ExE-like	TMEM37
CLDN4	5.00693e-83	0.452733	0.631	0.207	1.16516e-78	ExE-like	CLDN4
MYL12B	6.93898e-82	0.500805	0.988	0.97	1.61477e-77	ExE-like	MYL12B
DNAJC15	9.1326e-81	0.616311	0.92	0.721	2.12525e-76	ExE-like	DNAJC15
MXI1	9.62055e-81	0.353501	0.539	0.13	2.2388e-76	ExE-like	MXI1
SOX7	5.08448e-80	0.258044	0.304	0.029	1.18321e-75	ExE-like	SOX7
HEBP1	8.0406e-80	0.548403	0.801	0.453	1.87113e-75	ExE-like	HEBP1
MANBA	3.06792e-79	0.48987	0.649	0.218	7.13936e-75	ExE-like	MANBA
RNF43	2.60146e-78	0.340893	0.515	0.12	6.05386e-74	ExE-like	RNF43
SELM	6.94499e-78	0.66601	0.72	0.335	1.61617e-73	ExE-like	SELM
RAB11FIP1	1.0714e-77	0.658786	0.786	0.393	2.49326e-73	ExE-like	RAB11FIP1
BOC	1.33246e-77	0.352972	0.482	0.104	3.10078e-73	ExE-like	BOC
DUSP2	3.16255e-77	0.382408	0.518	0.13	7.35957e-73	ExE-like	DUSP2
H2AFJ	2.24122e-76	0.651891	0.926	0.759	5.21555e-72	ExE-like	H2AFJ
SLC7A5	2.86475e-76	0.674324	0.881	0.561	6.66657e-72	ExE-like	SLC7A5
MARK1	2.34691e-75	0.459008	0.598	0.181	5.46149e-71	ExE-like	MARK1
PDCD4	3.40049e-75	0.658849	0.747	0.347	7.91328e-71	ExE-like	PDCD4
MXRA8	1.37117e-74	0.276344	0.39	0.065	3.19085e-70	ExE-like	MXRA8
MPZL1	1.73719e-74	0.637541	0.961	0.782	4.04262e-70	ExE-like	MPZL1
SH2D4A	4.29442e-74	0.384334	0.613	0.199	9.99354e-70	ExE-like	SH2D4A
UBE2J1	8.49819e-74	0.501372	0.798	0.45	1.97761e-69	ExE-like	UBE2J1
ITGB1	1.37117e-73	0.640456	0.997	0.973	3.19085e-69	ExE-like	ITGB1
HSPB8	1.32007e-72	0.323651	0.494	0.127	3.07193e-68	ExE-like	HSPB8
SLCO2A1	4.37685e-71	0.373868	0.58	0.173	1.01854e-66	ExE-like	SLCO2A1
SDC4	3.46496e-70	0.391673	0.679	0.262	8.06331e-66	ExE-like	SDC4
MBNL2	1.4235e-69	0.253531	0.286	0.031	3.31263e-65	ExE-like	MBNL2
REXO2	3.02478e-68	0.534566	0.94	0.886	7.03897e-64	ExE-like	REXO2
FAM110B	3.08743e-68	0.304367	0.551	0.162	7.18476e-64	ExE-like	FAM110B
DSP1	9.47638e-68	0.755277	0.964	0.836	2.20525e-63	ExE-like	DSP
TANC2	2.52507e-67	0.323298	0.452	0.103	5.87609e-63	ExE-like	TANC2
CDKN1C	2.84719e-67	0.534143	0.631	0.242	6.6257e-63	ExE-like	CDKN1C
SUCO	4.26532e-67	0.640377	0.851	0.551	9.92583e-63	ExE-like	SUCO
GADD45G	4.49346e-67	0.325732	0.461	0.111	1.04567e-62	ExE-like	GADD45G
PRSS12	1.72293e-66	0.332277	0.506	0.133	4.00944e-62	ExE-like	PRSS12
SLC7A2	5.02979e-66	0.342512	0.458	0.11	1.17048e-61	ExE-like	SLC7A2
TBC1D9	1.70203e-65	0.330113	0.432	0.096	3.9608e-61	ExE-like	TBC1D9
SPIN4	7.10297e-65	0.394939	0.551	0.172	1.65293e-60	ExE-like	SPIN4
ARHGAP10	1.18347e-64	0.386724	0.619	0.23	2.75405e-60	ExE-like	ARHGAP10
DNAJC1	1.2634e-64	0.586675	0.869	0.655	2.94006e-60	ExE-like	DNAJC1
ARHGAP241	1.49724e-64	0.361641	0.527	0.152	3.48423e-60	ExE-like	ARHGAP24
HEY11	2.21054e-64	0.316979	0.518	0.146	5.14415e-60	ExE-like	HEY1
SLC3A2	8.43661e-64	0.631002	0.94	0.852	1.96328e-59	ExE-like	SLC3A2
FEZ2	1.84318e-63	0.478766	0.815	0.557	4.28926e-59	ExE-like	FEZ2
PKDCC	1.2594e-62	0.296495	0.464	0.118	2.93075e-58	ExE-like	PKDCC
ACPP	1.66047e-62	0.278405	0.33	0.054	3.86407e-58	ExE-like	ACPP
TRPM7	2.05784e-62	0.551646	0.765	0.416	4.78879e-58	ExE-like	TRPM7
LHFP	2.81771e-62	0.306976	0.56	0.181	6.5571e-58	ExE-like	LHFP
LIMA1	3.69664e-62	0.739718	0.905	0.698	8.60245e-58	ExE-like	LIMA1
SPATS2L	6.68317e-62	0.569529	0.961	0.835	1.55524e-57	ExE-like	SPATS2L
CCNG2	1.49176e-61	0.411577	0.619	0.228	3.47149e-57	ExE-like	CCNG2
CGN	6.30293e-61	0.348385	0.586	0.213	1.46676e-56	ExE-like	CGN
DLGAP4	6.74228e-61	0.493591	0.824	0.556	1.569e-56	ExE-like	DLGAP4
C5orf30	1.764e-60	0.443253	0.64	0.284	4.105e-56	ExE-like	C5orf30
FUT8	1.90773e-60	0.399568	0.738	0.362	4.43949e-56	ExE-like	FUT8
2020-09-08	2.43099e-60	0.319742	0.554	0.182	5.65715e-56	ExE-like	2020-09-08
2020-09-07	5.12233e-60	0.436615	0.991	0.997	1.19202e-55	ExE-like	2020-09-07
TMEM30A	3.8971e-59	0.510984	0.786	0.451	9.06894e-55	ExE-like	TMEM30A
DGCR6	7.80569e-59	0.310242	0.503	0.163	1.81646e-54	ExE-like	DGCR6
SH3KBP1	1.26453e-58	0.384684	0.595	0.224	2.94268e-54	ExE-like	SH3KBP1
BMP4	2.51687e-58	0.450221	0.676	0.302	5.85701e-54	ExE-like	BMP4
PRSS23	6.31686e-58	0.297571	0.485	0.141	1.47e-53	ExE-like	PRSS23
MPC2	8.04915e-58	0.562392	0.917	0.838	1.87312e-53	ExE-like	MPC2
PLD3	1.27647e-56	0.509445	0.863	0.714	2.97046e-52	ExE-like	PLD3
SGK11	3.71827e-56	0.312817	0.5	0.154	8.6528e-52	ExE-like	SGK1
IGDCC3	2.20022e-55	0.456191	0.836	0.554	5.12013e-51	ExE-like	IGDCC3
JADE3	3.32688e-55	0.321012	0.482	0.15	7.74198e-51	ExE-like	JADE3
TLE41	8.33916e-55	0.809162	0.946	0.792	1.94061e-50	ExE-like	TLE4
OSBPL9	1.12455e-54	0.478279	0.866	0.698	2.61695e-50	ExE-like	OSBPL9
ATP1A1	1.42694e-54	0.48356	0.946	0.858	3.32064e-50	ExE-like	ATP1A1
MSX1	4.53072e-54	0.350508	0.607	0.227	1.05434e-49	ExE-like	MSX1
RAB31	5.11984e-53	0.492269	0.902	0.685	1.19144e-48	ExE-like	RAB31
CD63	6.37442e-53	0.297118	1	0.999	1.48339e-48	ExE-like	CD63
FN11	9.23842e-53	0.637822	0.899	0.704	2.14987e-48	ExE-like	FN1
WFDC2	1.39642e-52	0.61328	0.94	0.81	3.24961e-48	ExE-like	WFDC2
DYNLL1	7.05398e-52	0.377675	0.997	1	1.64153e-47	ExE-like	DYNLL1
TMBIM6	1.18742e-51	0.348784	0.991	0.983	2.76325e-47	ExE-like	TMBIM6
DUSP6	2.0236e-51	0.463516	0.699	0.36	4.70913e-47	ExE-like	DUSP6
MGST3	1.47789e-50	0.34335	0.964	0.962	3.4392e-46	ExE-like	MGST3
FREM21	5.46225e-50	0.315605	0.56	0.211	1.27112e-45	ExE-like	FREM2
PDLIM1	1.55448e-49	0.493541	0.884	0.763	3.61742e-45	ExE-like	PDLIM1
STARD10	1.97124e-49	0.26043	0.533	0.194	4.58726e-45	ExE-like	STARD10
SLC7A3	2.62781e-49	0.391804	0.699	0.394	6.11518e-45	ExE-like	SLC7A3
TACC1	5.31523e-49	0.293699	0.455	0.141	1.23691e-44	ExE-like	TACC1
NRK1	5.81146e-49	0.250068	0.467	0.134	1.35238e-44	ExE-like	NRK
PKP2	3.84188e-48	0.281851	0.527	0.189	8.94045e-44	ExE-like	PKP2
ARMCX3	7.57212e-48	0.423327	0.812	0.576	1.76211e-43	ExE-like	ARMCX3
EPHB6	8.02789e-48	0.372069	0.557	0.227	1.86817e-43	ExE-like	EPHB6
SPPL2A	1.84793e-47	0.365823	0.768	0.486	4.30033e-43	ExE-like	SPPL2A
NRIP1	6.36963e-47	0.449882	0.631	0.288	1.48228e-42	ExE-like	NRIP1
TM7SF2	7.98172e-47	0.48541	0.783	0.592	1.85743e-42	ExE-like	TM7SF2
SERF2	1.09577e-46	0.41879	1	1	2.54998e-42	ExE-like	SERF2
ALCAM	1.22244e-46	0.438676	0.64	0.312	2.84474e-42	ExE-like	ALCAM
ELMO1	1.42729e-46	0.293807	0.53	0.197	3.32144e-42	ExE-like	ELMO1
TBC1D1	2.08094e-46	0.469459	0.744	0.437	4.84255e-42	ExE-like	TBC1D1
AK1	2.65075e-46	0.439585	0.786	0.545	6.16857e-42	ExE-like	AK1
GGH	1.05875e-45	0.389778	0.804	0.616	2.46382e-41	ExE-like	GGH
FTH1	1.10836e-45	0.263646	1	1	2.57927e-41	ExE-like	FTH1
ETV3	1.17487e-45	0.284134	0.461	0.151	2.73404e-41	ExE-like	ETV3
REEP5	1.3083e-45	0.360434	0.878	0.758	3.04454e-41	ExE-like	REEP5
SHTN1	1.75863e-45	0.553181	0.372	0.105	4.09251e-41	ExE-like	SHTN1
MAGED1	7.84106e-45	0.399338	0.923	0.795	1.82469e-40	ExE-like	MAGED1
AHCYL1	3.16241e-44	0.42791	0.89	0.752	7.35924e-40	ExE-like	AHCYL1
CLDN10	3.27606e-44	1.17677	0.717	0.513	7.62371e-40	ExE-like	CLDN10
ENTPD4	1.15983e-43	0.32813	0.524	0.208	2.69905e-39	ExE-like	ENTPD4
LMNA	1.21062e-43	0.388193	0.69	0.425	2.81724e-39	ExE-like	LMNA
CLCN5	1.73303e-43	0.308818	0.5	0.185	4.03293e-39	ExE-like	CLCN5
KANK1	5.17996e-43	0.338669	0.613	0.289	1.20543e-38	ExE-like	KANK1
WBP5	9.99665e-43	0.369709	1	0.992	2.32632e-38	ExE-like	WBP5
WWTR1	1.48532e-42	0.371057	0.592	0.271	3.45648e-38	ExE-like	WWTR1
ZFP36L11	3.14813e-42	0.441263	0.839	0.665	7.32602e-38	ExE-like	ZFP36L1
KHDRBS3	5.27235e-42	0.348584	0.75	0.482	1.22693e-37	ExE-like	KHDRBS3
CDX2	5.9101e-42	0.2622	0.521	0.198	1.37534e-37	ExE-like	CDX2
TSTD1	6.68416e-42	0.415798	0.952	0.951	1.55547e-37	ExE-like	TSTD1
YPEL5	6.94224e-42	0.372786	0.801	0.614	1.61553e-37	ExE-like	YPEL5
CD55	8.90537e-42	0.355661	0.583	0.295	2.07237e-37	ExE-like	CD55
ATP2B4	1.37654e-41	0.32756	0.554	0.242	3.20334e-37	ExE-like	ATP2B4
FSTL1	1.54806e-41	0.424196	0.899	0.709	3.60248e-37	ExE-like	FSTL1
PBX1	1.92055e-41	0.434214	0.899	0.741	4.46931e-37	ExE-like	PBX1
WNT5B	9.11035e-41	0.261747	0.554	0.23	2.12007e-36	ExE-like	WNT5B
JUP	1.08255e-40	0.349101	0.714	0.413	2.5192e-36	ExE-like	JUP
EDNRB	4.58542e-40	0.321901	0.497	0.21	1.06707e-35	ExE-like	EDNRB
SH3BP5	7.05929e-40	0.265422	0.408	0.138	1.64277e-35	ExE-like	SH3BP5
QPRT	8.27291e-40	0.387178	0.952	0.922	1.92519e-35	ExE-like	QPRT
C4orf3	9.46092e-40	0.312732	0.958	0.946	2.20165e-35	ExE-like	C4orf3
SDC21	2.40354e-39	0.387832	0.807	0.617	5.59328e-35	ExE-like	SDC2
IGSF10	4.57493e-39	0.25188	0.503	0.207	1.06463e-34	ExE-like	IGSF10
TMEM167A	1.01043e-38	0.306288	0.958	0.933	2.35138e-34	ExE-like	TMEM167A
SLC38A1	1.21741e-38	0.581884	0.97	0.905	2.83303e-34	ExE-like	SLC38A1
WIPF1	2.05022e-38	0.295518	0.518	0.22	4.77106e-34	ExE-like	WIPF1
NDUFB11	2.74264e-38	0.282448	0.991	0.995	6.3824e-34	ExE-like	NDUFB11
CDC42	3.2907e-38	0.414918	0.982	0.976	7.65778e-34	ExE-like	CDC42
B2M1	7.70417e-38	0.47542	0.938	0.914	1.79284e-33	ExE-like	B2M
RHOU	8.20374e-38	0.266179	0.408	0.137	1.90909e-33	ExE-like	RHOU
SHFM1	8.44224e-38	0.256689	1	1	1.96459e-33	ExE-like	SHFM1
GLB1	9.91493e-38	0.334688	0.667	0.397	2.3073e-33	ExE-like	GLB1
SLC20A2	1.13801e-37	0.317339	0.527	0.239	2.64826e-33	ExE-like	SLC20A2
IGFBP51	1.40843e-37	0.325425	0.286	0.065	3.27755e-33	ExE-like	IGFBP5
RTN4	5.19409e-37	0.40132	0.985	0.977	1.20872e-32	ExE-like	RTN4
SPINT2	5.52697e-37	0.544008	0.926	0.898	1.28618e-32	ExE-like	SPINT2
SEC61B	8.21615e-37	0.281401	0.997	0.999	1.91198e-32	ExE-like	SEC61B
FIGN	1.48071e-36	0.351854	0.598	0.304	3.44576e-32	ExE-like	FIGN
PPIB	1.57139e-36	0.293403	0.997	0.991	3.65677e-32	ExE-like	PPIB
RP11-85G21.31	1.65019e-36	0.266071	0.414	0.137	3.84016e-32	ExE-like	RP11-85G21.3
SLC12A2	1.83435e-36	0.416401	0.548	0.263	4.26871e-32	ExE-like	SLC12A2
2020-09-11	1.95904e-36	0.308957	0.976	0.95	4.55889e-32	ExE-like	2020-09-11
FMR1	2.00288e-36	0.350481	0.646	0.337	4.66089e-32	ExE-like	FMR1
ATOX1	2.59179e-36	0.333278	0.982	0.98	6.03134e-32	ExE-like	ATOX1
DSC2	2.62901e-36	0.36333	0.863	0.659	6.11798e-32	ExE-like	DSC2
HES11	2.76273e-36	0.59603	0.86	0.734	6.42915e-32	ExE-like	HES1
PTPRF	3.29831e-36	0.380011	0.833	0.637	7.67549e-32	ExE-like	PTPRF
DAAM1	4.00628e-36	0.395065	0.854	0.67	9.32301e-32	ExE-like	DAAM1
CLTB	1.4036e-35	0.318818	0.738	0.532	3.26632e-31	ExE-like	CLTB
SMAGP	2.99892e-35	0.265914	0.628	0.353	6.97879e-31	ExE-like	SMAGP
MPP5	4.74058e-35	0.310121	0.676	0.401	1.10318e-30	ExE-like	MPP5
PVRL2	5.21692e-35	0.318233	0.768	0.624	1.21403e-30	ExE-like	PVRL2
MYO1B	5.76756e-35	0.4117	0.81	0.642	1.34217e-30	ExE-like	MYO1B
SCAF11	8.25824e-35	0.397475	0.955	0.909	1.92177e-30	ExE-like	SCAF11
PPP1R2	7.62369e-34	0.326237	0.786	0.608	1.77411e-29	ExE-like	PPP1R2
LRRC37B	8.27379e-34	0.277512	0.548	0.28	1.92539e-29	ExE-like	LRRC37B
DAG1	8.5332e-34	0.336231	0.637	0.367	1.98576e-29	ExE-like	DAG1
ARID3A	1.1328e-33	0.327331	0.786	0.556	2.63614e-29	ExE-like	ARID3A
PTS	2.88719e-33	0.448516	0.833	0.741	6.71878e-29	ExE-like	PTS
TCF4	5.88845e-33	0.465688	0.899	0.775	1.3703e-28	ExE-like	TCF4
CCNI	1.09669e-32	0.351877	0.988	0.987	2.5521e-28	ExE-like	CCNI
FDX1	1.35683e-32	0.346721	0.807	0.696	3.15747e-28	ExE-like	FDX1
SCG31	1.67019e-32	0.339733	0.932	0.82	3.88669e-28	ExE-like	SCG3
RAB25	1.94691e-32	0.318085	0.747	0.582	4.53065e-28	ExE-like	RAB25
ANKS1A	2.09887e-32	0.3565	0.533	0.263	4.88427e-28	ExE-like	ANKS1A
PRTG2	2.72914e-32	0.42846	0.878	0.639	6.35097e-28	ExE-like	PRTG
PRSS8	1.63201e-31	0.290994	0.738	0.554	3.79785e-27	ExE-like	PRSS8
WWC3	4.79221e-31	0.263914	0.467	0.207	1.1152e-26	ExE-like	WWC3
PPP1CB	5.25243e-31	0.360347	0.887	0.777	1.22229e-26	ExE-like	PPP1CB
CCDC34	9.35424e-31	0.341308	0.878	0.86	2.17683e-26	ExE-like	CCDC34
TSPAN5	1.08087e-30	0.27229	0.562	0.302	2.51529e-26	ExE-like	TSPAN5
TCF7L2	1.42781e-30	0.363462	0.696	0.448	3.32266e-26	ExE-like	TCF7L2
CDC42SE1	3.59358e-30	0.333219	0.732	0.506	8.36262e-26	ExE-like	CDC42SE1
UGP21	8.5803e-30	0.34886	0.994	0.97	1.99672e-25	ExE-like	UGP2
LYN	1.96332e-29	0.31852	0.664	0.426	4.56884e-25	ExE-like	LYN
RP11-20D14.6	3.41316e-29	0.358476	0.807	0.651	7.94277e-25	ExE-like	RP11-20D14.6
RPUSD3	3.70899e-29	0.349076	0.759	0.661	8.6312e-25	ExE-like	RPUSD3
RBPMS	3.99395e-29	0.291896	0.851	0.777	9.29432e-25	ExE-like	RBPMS
ENC11	6.99446e-29	0.435862	0.753	0.506	1.62768e-24	ExE-like	ENC1
ADGRL2	6.73587e-28	0.378768	0.357	0.136	1.5675e-23	ExE-like	ADGRL2
CD59	2.16373e-27	0.272554	0.804	0.665	5.03523e-23	ExE-like	CD59
ID4	2.52987e-27	0.260129	0.693	0.432	5.88726e-23	ExE-like	ID4
APLP2	2.65455e-27	0.285113	0.982	0.973	6.17741e-23	ExE-like	APLP2
CTTNBP2	2.70802e-27	0.273184	0.533	0.278	6.30183e-23	ExE-like	CTTNBP2
SLC2A1	3.86682e-27	0.355316	0.72	0.529	8.99847e-23	ExE-like	SLC2A1
FLRT3	1.10301e-26	0.346933	0.497	0.245	2.56681e-22	ExE-like	FLRT3
SEMA6A1	1.73282e-26	0.482871	0.902	0.751	4.03245e-22	ExE-like	SEMA6A
BASP11	3.73165e-26	0.340097	0.926	0.831	8.68392e-22	ExE-like	BASP1
WAC-AS1	5.49393e-26	0.26548	0.667	0.466	1.27849e-21	ExE-like	WAC-AS1
SLC44A2	6.18989e-26	0.256569	0.646	0.427	1.44045e-21	ExE-like	SLC44A2
SOCS2	8.48316e-26	0.29905	0.702	0.529	1.97412e-21	ExE-like	SOCS2
CCDC6	1.56243e-25	0.358414	0.744	0.575	3.63593e-21	ExE-like	CCDC6
RHOC	2.4456e-25	0.270915	0.857	0.79	5.69116e-21	ExE-like	RHOC
NRP21	1.0567e-24	0.326073	0.616	0.365	2.45906e-20	ExE-like	NRP2
SERINC5	2.08108e-24	0.360735	0.512	0.265	4.84289e-20	ExE-like	SERINC5
VPS35	2.49104e-24	0.277151	0.92	0.902	5.79689e-20	ExE-like	VPS35
AP1S1	2.84032e-24	0.338408	0.702	0.63	6.60971e-20	ExE-like	AP1S1
NUAK1	3.32716e-24	0.290673	0.432	0.209	7.74262e-20	ExE-like	NUAK1
UTRN	4.89339e-24	0.324235	0.732	0.525	1.13874e-19	ExE-like	UTRN
MIR205HG	5.82727e-24	0.489354	0.491	0.305	1.35606e-19	ExE-like	MIR205HG
CETN2	8.156e-24	0.262272	0.878	0.822	1.89798e-19	ExE-like	CETN2
FAM213A	1.03883e-23	0.254583	0.926	0.916	2.41746e-19	ExE-like	FAM213A
ARF6	1.53613e-23	0.390233	0.655	0.454	3.57474e-19	ExE-like	ARF6
FKBP2	1.69165e-23	0.2716	0.988	0.978	3.93664e-19	ExE-like	FKBP2
MORF4L2	4.22975e-23	0.297144	0.973	0.969	9.84304e-19	ExE-like	MORF4L2
SC5D	4.41945e-23	0.332404	0.807	0.745	1.02845e-18	ExE-like	SC5D
TMCO1	9.23899e-23	0.264136	0.926	0.929	2.15001e-18	ExE-like	TMCO1
BTBD7	1.00536e-22	0.353998	0.705	0.489	2.33958e-18	ExE-like	BTBD7
MRS21	1.4437e-22	0.370633	0.774	0.678	3.35963e-18	ExE-like	MRS2
DYNC1I2	2.2857e-21	0.252164	0.997	0.994	5.31905e-17	ExE-like	DYNC1I2
CTNNB1	3.08099e-21	0.412836	0.893	0.792	7.16976e-17	ExE-like	CTNNB1
EPB41L3	3.70789e-21	0.263066	0.497	0.283	8.62862e-17	ExE-like	EPB41L3
LAMC1	9.57036e-21	0.29788	0.804	0.655	2.22712e-16	ExE-like	LAMC1
COMT1	9.91062e-21	0.250655	0.643	0.496	2.3063e-16	ExE-like	COMT
SPARC1	1.44655e-20	0.254547	0.893	0.842	3.36626e-16	ExE-like	SPARC
CD24	1.56358e-20	1.11027	0.44	0.282	3.6386e-16	ExE-like	CD24
RBMS12	2.08516e-20	0.267729	0.881	0.784	4.85238e-16	ExE-like	RBMS1
RRBP1	3.11031e-20	0.450532	0.961	0.913	7.23801e-16	ExE-like	RRBP1
MMD1	3.67933e-20	0.295604	0.693	0.515	8.56217e-16	ExE-like	MMD
PET100	7.38432e-20	0.296555	0.979	0.981	1.7184e-15	ExE-like	PET100
PRDX41	9.94291e-20	0.308141	0.932	0.944	2.31382e-15	ExE-like	PRDX4
SOX4	1.26817e-19	0.291372	0.997	0.988	2.95116e-15	ExE-like	SOX4
RERE	2.27955e-19	0.325292	0.842	0.752	5.30474e-15	ExE-like	RERE
RABEP1	4.08207e-19	0.264239	0.839	0.727	9.49938e-15	ExE-like	RABEP1
GCHFR	6.35114e-19	0.313212	0.783	0.682	1.47797e-14	ExE-like	GCHFR
NES1	6.59715e-19	0.282025	0.795	0.694	1.53522e-14	ExE-like	NES
AGL	1.26808e-18	0.254799	0.676	0.503	2.95094e-14	ExE-like	AGL
MYH9	5.72072e-18	0.270474	0.768	0.655	1.33127e-13	ExE-like	MYH9
C1GALT1	2.43243e-17	0.261788	0.821	0.723	5.66051e-13	ExE-like	C1GALT1
JUND	5.73623e-17	0.338578	0.61	0.438	1.33488e-12	ExE-like	JUND
SFRP11	8.35871e-17	0.278336	0.574	0.367	1.94515e-12	ExE-like	SFRP1
LRP1	9.37221e-16	0.269495	0.524	0.349	2.18101e-11	ExE-like	LRP1
MSMO1	1.49019e-15	0.259108	0.863	0.826	3.46781e-11	ExE-like	MSMO1
PCAT141	1.92045e-15	0.312081	0.351	0.17	4.46907e-11	ExE-like	PCAT14
KCNQ1OT1	5.33681e-15	0.276776	0.539	0.373	1.24193e-10	ExE-like	KCNQ1OT1
MEST1	9.45237e-15	0.318787	0.783	0.762	2.19966e-10	ExE-like	MEST
KIAA1551	1.81205e-14	0.335677	0.833	0.759	4.21682e-10	ExE-like	KIAA1551
TAGLN	1.0989e-13	0.431036	0.545	0.4	2.55724e-09	ExE-like	TAGLN
GOLM1	2.40193e-13	0.296164	0.688	0.602	5.58954e-09	ExE-like	GOLM1
GOLGB1	1.03793e-12	0.297185	0.869	0.83	2.41537e-08	ExE-like	GOLGB1
HSP90B1	2.12654e-12	0.260384	1	0.997	4.94868e-08	ExE-like	HSP90B1
YAP1	7.78455e-12	0.28764	0.685	0.574	1.81154e-07	ExE-like	YAP1
EMC10	1.10214e-11	0.252333	0.762	0.694	2.5648e-07	ExE-like	EMC10
CCDC186	5.47836e-11	0.25659	0.298	0.168	1.27487e-06	ExE-like	CCDC186
SQLE	9.55309e-11	0.309442	0.908	0.881	2.2231e-06	ExE-like	SQLE
SHOC2	4.05881e-10	0.270929	0.756	0.684	9.44526e-06	ExE-like	SHOC2
NDUFB81	6.45113e-10	0.333942	0.432	0.28	1.50124e-05	ExE-like	NDUFB8
UQCR111	1.18244e-09	0.345053	0.438	0.281	2.75167e-05	ExE-like	UQCR11
LBR	3.8283e-08	0.269409	0.765	0.747	0.000890884	ExE-like	LBR
C1orf56	4.37686e-05	0.324415	0.33	0.233	1	ExE-like	C1orf56
