# Supplementary material for: High-resolution transcriptional and morphogenetic profiling of cells from micropatterned human ESC gastruloid cultures
Source: eLife journal article supplement (doi:10.7554/elife.59445), 2020-11-18
Supplement: supp [file elife-59445-supp-v1.zip › elife_poa_e59445_Source_data_3.xlsx]

## Sheet: Gast.ref.sharedHVGs
Shared highly variable genes (HVG) between gastruloid and indicated reference dataset, and average gene expression correlation on the basis of shared HVG																Average gene expression correlation between gastruloids and reference data on the basis of shared HVGs
Mouse (Pijuan-sala et al.)	Cynomolgous monkey (Ma et al.)	Cynomolgous monkey (Nakamura et al.)	In vitro human embryo (Xiang et al.)	hESC-differentiated cells (Chu et al.)	hESC-differentiated cells (Loh et al.)	hESC-differentiated cells (Lu et al.)	hESC-differentiated hPGCLCs (Chen et al.)	hESC-differentiated in 3D (Zheng et al.)	In vitro human embryo (Lv et al.)	Cynomolgous monkey (Ma et al.)						Correlation with mouse developmental stage
CER1	ACTC1	PDPN	HLA-G	GABRP	DKK4	DKK4	APOA2	ACTC1	RAB3B	ACTA2								Gastruloid
MESP1	IGFBP3	KRT19	HIST1H4C	CER1	CER1	NPPB	CST1	CTSV	CTGF	SPP1						Mouse Stages	E6.5	0.610755
DKK1	CER1	HAND1	S100A10	LPL	SAT1	DKK1	MT1G	IGFBP3	RND3	DCDC2							E6.75	0.625038
HAND1	PLA2G2A	S100A10	FABP5	HAPLN1	LUM	ANKRD1	LEFTY2	CLDN10	S100A4	TTR							E7.0	0.62851
KRT18	CTSV	KRT18	MT-ND4L	TNFRSF11B	DKK1	CD48	S100A6	PLA2G2A	VIM	KRT23							E7.25	0.623289
SOX17	DLK1	TOP2A	SPP1	ERBB4	MT1G	CER1	CRH	KRT16	PRDM1	NPPB							E7.5	0.621018
LHX1	KRT19	FABP5	PMP22	ACTC1	NNAT	MFAP4	IGFBP5	NTS	GREM1	ANKRD1
KRT19	ANKRD1	FN1	HAND1	TFPI	HIST1H4C	CYP26A1	CLDN10	ID1	CCND2	SST						Correlation with monkey developmental stage
KRT8	HPGD	AHNAK	FN1	DKK1	PCP4	MT1G	MT1H	DBI	TAGLN	SPINK1								Gastruloid
MIXL1	CLDN10	SOX2	IFI6	DCN	DCN	S100A10	ACTC1	TMEM88	PDGFRA	CDH18						Monkey Stages	11 dpf	0.474624
MYL7	TRIML2	BAMBI	VIM	FLT1	CRABP1	CXCR4	CST4	PDPN	STC1	TAGLN							12 dpf	0.509382
ID2	PDPN	TRIML2	GAL	SELE	IFITM1	SLC2A3	KRT7	TPM1	SEMA5A	MYL7							13 dpf	0.486344
APOA2	MESP1	DKK4	TMEM88	SERPINB9	RGS5	SPP1	CCKBR	TAGLN	GPRC5A	SERPINE2							14 dpf	0.474905
CYP26A1	DKK4	TERF1	MT1X	DIO2	TAGLN	ACTA1	PLA2G2A	CRH	POU5F1	DLK1							15 dpf	0.535399
MT2A	IGF1	CTSL	CLDN10	LEFTY2	MT1X	ANXA1	LEFTY1	LUM	SULF1	CLDN10							17 dpf	0.455372
IGFBP3	EMX2	ID2	MT1G	STC1	VIM	NTS	CCL2	EPCAM	DIO2	TTC29
S100A10	LHX1	LHX1	RSPO3	CTSK	COL2A1	SERPINB9	PTN	ANXA2	COL6A3	WFDC2								Mouse (Pijuan-sala et al.)
DLK1	HAND1	ANXA2	SLC40A1	LUM	ANXA2	CCL2	TAC3	S100A10	WNT5A	SLC40A1								Epiblast	Primitive Streak	ExE ectoderm	Visceral endoderm	ExE endoderm	Nascent mesoderm	Parietal endoderm	Rostral neuroectoderm	Surface ectoderm	Anterior primitive streak	PGC	Mixed mesoderm	Definitive endoderm	Haematoendothelial progenitors	Mesenchyme	Blood progenitors 1	Blood progenitors 2	ExE mesoderm	Gut	Caudal epiblast	Erythroid3	Erythroid2	Notochord	Intermediate mesoderm	Caudal mesoderm	Pharyngeal mesoderm	Paraxial mesoderm	Caudal neurectoderm	Somitic mesoderm	Erythroid1	Allantois	Endothelium
HAPLN1	LEFTY2	PALLD	GPC3	COL1A1	ANXA1	MT2A	PLSCR2	CTSL	LBH	CD55						Gastruloid	Ectoderm	0.382028	0.350685	0.347625	0.32155	0.315564	0.306373	0.285078	0.390018	0.36255	0.320802	0.319307	0.2914	0.332346	0.307916	0.302603	0.321474	0.337024	0.294176	0.367324	0.343737	0.186778	0.280956	0.307374	0.29068	0.341523	0.322147	0.351128	0.361164	0.315995	0.285202	0.315346	0.288788
FST	GAL	SERPINE2	ACTC1	RGS5	MEIS1	TFPI	CXCL14	VIM	PAMR1	PENK							EPI-like	0.329555	0.341101	0.313724	0.317701	0.295072	0.349568	0.256105	0.354345	0.397102	0.323701	0.408503	0.38733	0.341315	0.405248	0.420093	0.371357	0.360185	0.431231	0.366697	0.361591	0.256923	0.251126	0.309464	0.379793	0.376143	0.394752	0.384251	0.368539	0.340039	0.270102	0.419038	0.330974
TFAP2C	TAGLN	RSPO3	B2M	SELL	SERPINF1	GYPB	LGALS1	NPPB	IGFBP7	CER1							Mesoderm-1	0.333776	0.360335	0.286487	0.303611	0.284908	0.413681	0.299583	0.336361	0.346146	0.36708	0.347276	0.42625	0.360737	0.402204	0.374501	0.372996	0.363659	0.400278	0.324395	0.356951	0.249129	0.280981	0.303837	0.404809	0.351738	0.410218	0.403102	0.326013	0.384785	0.304435	0.361315	0.309674
TFPI	GABRP	GATA6	APLNR	ARID5B	ACTC1	CST1	NPY	IFI6	RARRES2	RBM24							Mesoderm-2	0.497674	0.484688	0.397201	0.458854	0.410174	0.412179	0.405603	0.486338	0.471135	0.483864	0.443568	0.410105	0.495704	0.45029	0.425687	0.43924	0.436151	0.409648	0.502916	0.464128	0.306322	0.367763	0.449904	0.407608	0.431542	0.416867	0.437382	0.461505	0.41939	0.393258	0.39467	0.370158
BMP4	DIO3	NANOG	CKS2	ANXA1	GSTM3	GPC3	TAGLN	SOX17	PODXL	SAT1							Endoderm	0.320817	0.318974	0.309227	0.302647	0.283913	0.276708	0.23903	0.285459	0.297625	0.300629	0.282325	0.255151	0.30406	0.24132	0.227544	0.241597	0.258457	0.235554	0.275323	0.286804	0.26223	0.253146	0.292686	0.242284	0.277206	0.225478	0.245028	0.259585	0.258811	0.292419	0.215195	0.193959
KRT7	NTS	SERPINB9	FLRT3	CLDN11	FN1	APOA2	DIO3	CYP26A1	TMSB4X	CCR1							hPGCLC	0.383501	0.378291	0.406023	0.384263	0.382894	0.366529	0.353499	0.397148	0.463657	0.340829	0.422995	0.392843	0.342718	0.404342	0.441112	0.375471	0.373822	0.420772	0.408187	0.35975	0.201036	0.245605	0.306194	0.343103	0.369149	0.397512	0.369834	0.363924	0.32498	0.292487	0.41112	0.316906
GPC3	GRP	CXCL12	CGA	KDR	COL1A2	HAPLN1	PTGR1	TERF1	COL1A2	CRABP1							ExE-like	0.376265	0.392062	0.276728	0.319527	0.317514	0.436359	0.305801	0.372109	0.369591	0.382117	0.351598	0.432978	0.367233	0.399436	0.384036	0.38019	0.371242	0.405143	0.330874	0.384476	0.284366	0.305935	0.30869	0.407015	0.374372	0.412471	0.406892	0.360994	0.391164	0.30274	0.344241	0.281438
ID1	DKK1	DPPA4	HIST1H2BK	FHL1	PCDH8	FAM24B	DKK1	KRT7	MT2A	HSPB8
ANXA1	ISL1	ID3	GPX2	CYP26A1	HHIP	ERBB4	IFI6	HAND1	NPR3	GDF3								Cynomolgous monkey (Ma et al.)
RSPO3	DLX5	GDF3	NTS	CAV1	HHIPL2	HAS2	IGFBP3	S100A11	IGFBP4	TGFBI								E-AM	E-Gast	E-PGC	EXMC	L-AM1	L-AM2	L-Gast1	L-Gast2	postE-EPI	postL-EPI	TE and derivatives	VE/YE
GSTO1	DOK4	SGK1	MTRNR2L8	TM4SF18	NPY	TAGLN	GYPB	C8orf4	F3	NOG						Gastruloid	Ectoderm	0.480014	0.449108	0.501817	0.397492	0.529996	0.455858	0.483173	0.436994	0.387122	0.477112	0.31624	0.393961
PMP22	EPAS1	TAGLN2	TFPI	GREM1	NODAL	CDH6	CTSV	NANOS3	SLC40A1	AIM1							EPI-like	0.437755	0.485399	0.468587	0.279564	0.440994	0.33116	0.511169	0.312374	0.428971	0.471275	0.29958	0.353458
CDKN1C	KRT8	VIM	ANXA1	CRHBP	TNFRSF11B	CA2	S100A4	MYL9	TUBA1A	BMPER							Mesoderm-1	0.434486	0.469521	0.482945	0.305577	0.427856	0.331725	0.504011	0.358217	0.38021	0.432586	0.270818	0.363573
S100A11	HOXB6	TFPI	CST1	ACTA2	CD48	MT1H	CDKN1C	IGF1	COL1A1	RBM20							Mesoderm-2	0.389498	0.45134	0.464029	0.312546	0.398489	0.318691	0.482957	0.428295	0.341156	0.389717	0.219409	0.384383
SFRP1	IGFBP7	ANXA1	LGALS1	RND3	POSTN	SLC40A1	MYL4	NPY	B2M	DKK1							Endoderm	0.374052	0.411351	0.471768	0.28119	0.393929	0.274463	0.460673	0.387049	0.303888	0.359515	0.232824	0.374408
SPINK1	ACTA2	EOMES	RASD1	HAS2	MAPK10	LGI1	PCP4	TAGLN2	STMN2	SH3KBP1							hPGCLC	0.481138	0.441114	0.514902	0.28211	0.420287	0.355403	0.41157	0.326172	0.327598	0.356055	0.330532	0.304548
UBE2C	DBI	CENPF	SERPINE2	IGFBP5	SERPINB9	STC1	MT2A	RGS13	RBP1	FAM65B							ExE-like	0.57909	0.429863	0.424087	0.293133	0.448605	0.510932	0.344923	0.357077	0.309117	0.310082	0.421114	0.317551
TDGF1	SLC8A1	MDK	LEFTY1	CYP1B1	AASS	GAL	MT1X	MESP1	MXRA5	DENND2C
GADD45G	SAT1	TBX3	SFRP2	PCDH17	ID2	HIST1H4C	STMN2	SPP1	THY1	ANXA1								Cynomolgous monkey (Nakamura et al.)
S100A6	KRT18	CER1	DYNLL1	VTCN1	EFNA1	NODAL	CYP26A1	GSTO1	HTRA1	ARHGAP15								PostE-EPI	PostL-EPI	Gast1	Gast2a	Gast2b	VE/YE	Post-paTE	EXMC
TMEM37	RSPO3	HAS2	LINC00458	LGALS1	GPRC5A	TNFRSF11B	KRT18	ITM2B	TFPI	ITM2A						Gastruloid	Ectoderm	0.394435	0.403804	0.409302	0.418383	0.399676	0.393691	0.333953	0.369907
SLPI	LIX1	S100A6	HPGD	FAM124B	FOS	KRT8	MT1M	HSPB1	UACA	CGA							EPI-like	0.402243	0.399268	0.399097	0.39443	0.361937	0.35386	0.300035	0.314626
HTRA1	MIXL1	AK4	C9orf3	CD48	TGFBI	SAT1	MT1E	OTOR	LUM	NCALD							Mesoderm-1	0.38714	0.394294	0.408557	0.410068	0.386915	0.363553	0.303008	0.322429
DPPA4	S100A10	RPL22L1	GDF3	CALCRL	CYP26A1	NFKBIA	GPX2	DIO3	VCAN	MT1X							Mesoderm-2	0.357302	0.367372	0.386323	0.401937	0.413598	0.366743	0.287472	0.323893
MSX1	MYL7	PTPRZ1	ATP6V0D2	CDH6	KHDRBS3	T	TINAGL1	TBCA	FN1	S100A4							Endoderm	0.372655	0.376473	0.394068	0.403755	0.40087	0.387096	0.311337	0.329444
VIM	FABP5	LGALS1	TOMM7	GAD1	SEMA3E	MT1X	NTS	ID3	PMAIP1	NRG2							hPGCLC	0.384218	0.381897	0.39901	0.384113	0.372955	0.36273	0.329673	0.332085
ADM	HAS2	BMP2	S100A9	COL6A3	EFEMP1	LINC00261	MESP1	EPAS1	FILIP1L	SLC4A8							ExE-like	0.34939	0.35591	0.391382	0.364303	0.370063	0.362119	0.37295	0.343057
MSX2	GPC3	MIXL1	GADD45B	B2M	BICD1	KRT18	TTR	TFAP2C	ARID5B	DAB2
ANXA2	TFPI	LEFTY1	DDIT4	PTN	FABP5	BMP4	LINC00643	SLC3A2	BMP2	MGLL								6-14 dpf in vitro human embryo epiblast (Xiang et al.)
PEG10	CLU	PDGFRA	S100A6	S100A6	SEMA3A	PMEL	ACTA1	UBE2C	TGM2	PGF								Inncer Cell Mass	Pre-implantation EPI	Post-implantation EPI	Primitive Streak Analage EPI
EPAS1	NKX2-5	KRT8	PITX2	HPGD	PRAC1	EFNA1	NPPB	CST1	HSPB8	PHLDA2						Gastruloid	Ectoderm	0.332383	0.416442	0.547059	0.55603
ID3	HES1	SAT1	MT1E	MFAP4	MT1H	ADM	GABRP	MSX2	LGALS1	SORBS1							EPI-like	0.323381	0.541688	0.613949	0.536039
PIM2	SCGN	CXCR4	TUBB2A	MTUS2	MIXL1	PRSS1	RP11-598D14.1	ANXA1	SORBS1	SV2C							Mesoderm-1	0.299154	0.481433	0.574865	0.547335
NRK	ANXA1	DKK1	GREM2	SEMA3E	ACTA2	TMEM150C	IGFBP7	HPGD	CALD1	KIAA1324							Mesoderm-2	0.273134	0.409374	0.534005	0.541331
FOXA2	FGFBP3	NODAL	FRZB	SERPINE2	TERF1	APLNR	KRT8	CLDN6	GPNMB	TNC							Endoderm	0.312487	0.431856	0.497344	0.545408
HOXB6	VIM	SPP1	HEY1	SULF1	CLU	MYL7	IGF1	TUBA1A	ADAMTS5	POSTN							hPGCLC	0.37992	0.486911	0.510126	0.540364
BAMBI	GDF3	CDH1	HSPB8	POSTN	NTF3	ENC1	HPGD	WLS	LOX	APLNR							ExE-like	0.43773	0.363867	0.457672	0.516993
FN1	PRRX1	BEX1	S100A13	TGFBI	CTGF	SERPINE2	DBI	MT1G	ITGA2	KIF21A
TAGLN2	APOA2	ANXA4	MUC15	IGFBP3	LRRC37B	F3	GAL	ACTA1	CLDN10	CCL2								hESC-differentiated cells (Chu et al.)
CA2	UBE2C	COLEC12	TUBB2B	GPNMB	SPINK1	PRSS35	NANOS3	BAMBI	GLRX	ATP12A								Definitive Endoderm	Endothelial Cell	H1 hESC	H9 hESC	Human Fibroblast Foreskin	Neuro Progenitor Cell	Trophoblast
EZR	TMEM54	CCNB1	CRABP2	SERHL2	PAMR1	PDLIM1	DLX5	RP11-598D14.1	MAP1B	SLC7A3						Gastruloid	Ectoderm	0.540157	0.471481	0.587901	0.589139	0.369801	0.610764	0.418087
GAL	KRT7	L1TD1	CXCR4	F3	FAM110B	TCEAL7	FGF17	ID2	PCDH18	LEFTY1							EPI-like	0.593228	0.474083	0.766908	0.763717	0.361186	0.509105	0.384811
EOMES	TOP2A	RHOB	HSPB1	COL1A2	SULF1	CDH11	SPP1	HOXB6	GOLIM4	ACVRL1							Mesoderm-1	0.657448	0.463785	0.671124	0.673394	0.335722	0.492927	0.361313
NTS	FAM184A	DNMT3B	CER1	NPY	CDH6	OLFML3	KRT23	ANXA3	GPX2	GADD45G							Mesoderm-2	0.693239	0.449549	0.542109	0.55399	0.309136	0.439122	0.300147
SGK1	EPCAM	T	LITAF	RALB	C1orf21	WNT5A	PGF	PYCARD	DKK1	DIO2							Endoderm	0.705051	0.464907	0.576611	0.582839	0.302134	0.438371	0.307677
LGALS1	MT1X	CENPE	PMAIP1	EFNA1	GPRC5C	PPFIBP2	KRT19	TUBB2B	CTSK	FSHR							hPGCLC	0.586069	0.456545	0.640955	0.649021	0.323567	0.452034	0.38841
ISL1	SOX7	UBE2C	CYP26A1	MEIS1	PDGFA	IDO1	IGF2	POU5F1	SERPINE2	PLA2G4A							ExE-like	0.440645	0.357979	0.519688	0.517698	0.275944	0.395008	0.65206
CRH	PLBD1	PMAIP1	APOA2	FAM46C	C1QTNF3	TTC29	MYL7	HIST1H4C	PHACTR2	SYT1
DKK4	TFAP2C	ARL4D	HSPE1	SAT1	ISL1	MSX1	C8orf4	SERPINE2	TGFBI	SEMA3D								hESC-differentiated cells (Loh et al.)
GATA6	GATA3	POU5F1	PDGFRA	TPM1	SLC40A1	RFPL2	ANXA1	PYDC1	DCN	TGM2								H7 hESC	Anterior Primitive Streak	Mid Primitive Streak	Lateral Mesoderm	Paraxial Mesoderm	Cardiac Mesoderm	Somitomere	Early Somite	Sclerotome
HES1	APLNR	FGF17	LGR5	RASGRP3	RBP1	CDA	NEAT1	FST	ALCAM	CNTN5						Gastruloid	Ectoderm	0.578747	0.599542	0.558561	0.537381	0.567094	0.663079	0.519411	0.536535	0.572232
SAT1	CUZD1	MKI67	OTX2	PMP22	SLC9A9	DDIT4	LINC00458	ATP2B1	SLC12A2	GABRP							EPI-like	0.756128	0.745589	0.719307	0.601431	0.651635	0.529445	0.592707	0.522367	0.587083
SOX2	KRT16	WFDC2	MMP2	STMN2	CTNNA3	CTSK	SLPI	TDGF1	IGFBP3	FDX1							Mesoderm-1	0.676922	0.76906	0.746595	0.642315	0.659183	0.541637	0.595602	0.496435	0.589424
ACTC1	CRYGS	ANXA3	KRT23	LEFTY1	SPP1	CRHBP	SPARCL1	PCSK1N	COL5A2	NPNT							Mesoderm-2	0.586744	0.758063	0.71076	0.682906	0.678856	0.517436	0.59439	0.455912	0.56672
SAMD3	SERPINE2	ANKRD1	IGFBP3	ANXA3	B3GNT7	PODXL	ACTG2	MAP1B	MUC15	LGR5							Endoderm	0.62726	0.691098	0.668913	0.623156	0.633033	0.519728	0.56949	0.455943	0.543235
TUBA1A	SFRP1	ENPEP	IFITM1	CXCL12	UGP2	LHFP	ACTA2	SPINT2	ACTA2	VTCN1							hPGCLC	0.624675	0.603483	0.634749	0.567143	0.564062	0.490626	0.531963	0.4859	0.528652
CRYAB	POLR3G	FLRT3	OLFML3	KCNK17	VCAN	LUM	FN1	SLPI	ESRRB	S100A6							ExE-like	0.443775	0.502776	0.515497	0.554204	0.475603	0.459229	0.441896	0.438253	0.429864
WNT2	CTSL	DSP	BEX1	PDGFRA	NPNT	LIX1	UBE2C	GAL	TRPV2	MXRA8
PRSS12	AHNAK	NPY	BAMBI	PRSS1	ACTA1	AASS	CRHBP	PENK	DYNLT3	SP6								hESC-differentiated cells (Lu et al.)
KDR	SOX2	ADM	NNAT	LCP1	CYFIP2	DDIT4L	RGS16	LHX1	SLC7A3	PHLDB2								D0	D1	D2	D4 (Definitive Endoderm)
PODXL	HAPLN1	EPAS1	ECM1	MECOM	LGALS1	MT1E	CDKN1A	CXCL14	FLT1	FAM43A						Gastruloid	Ectoderm	0.671762	0.674611	0.570576	0.516742
NPPB	FAM24B	HAPLN1	RBP1	WNT5A	PTCH1	ODC1	FRZB	APOA2	PDPN	CLIC3							EPI-like	0.781235	0.778647	0.653038	0.53421
STMN2	USP44	ZIC2	HIST1H1D	PRDM1	HTRA1	LEFTY2	CKB	TINAGL1	NANOG	DNAH6							Mesoderm-1	0.665389	0.806212	0.71608	0.558828
TMEM54	COL2A1	LIFR	MT-ATP6	ANXA2	HIST1H1A	HESX1	GRP	HAPLN1	KLF5	CDKN1C							Mesoderm-2	0.502704	0.697866	0.76456	0.592919
APLNR	PCSK1N	KRT7	SLC16A3	IFI16	APOA2	L1TD1	SLC2A3	CXCR4	S1PR3	ECM1							Endoderm	0.571447	0.661992	0.722779	0.689735
ARL4D	BAMBI	SLC2A1	NODAL	EFEMP1	FGFBP1	ID2	SAT1	MT1H	PHLDA1	MCC							hPGCLC	0.626017	0.648996	0.616274	0.547553
TBX3	NPY	DPYSL3	ID2	FN1	PLK2	GDF3	GADD45G	RARRES2	TSPAN5	COL1A1							ExE-like	0.540211	0.568275	0.557078	0.524118
CCND2	NEB	SEMA6A	TERF1	PAX6	FREM1	BST2	CLDN11	GABRP	GDF3	TBX3
CDX2	CXCL12	LRRN1	FEZ1	DKK4	MYLIP	TMEM54	HIST1H4C	DOK4	GNG11	FLRT3								12-14 dpf in vitro human embryo (Xiang et al.)
MEIS2	FGF17	STOM	CRABP1	GPRC5A	AK1	VIM	MIXL1	HSPA8	CADM1	ACTC1								Amniotic Epithelium	Cytotrophoblast	Epiblast	Extravillous Cytotrophoblast	Intermediate	Hypoblast/Primitive Endoderm	Syncytiotrophoblast
C9orf135	PRTG	CYR61	DUSP6	CHN1	MYL4	S100A13	FGF19	CRHBP	TDGF1	TFPI2						Gastruloid	Ectoderm	0.401457	0.278113	0.562901	0.307041	0.538939	0.369998	0.198346
WFDC2	PALLD	HHEX	MT1H	PLK2	ITM2A	RHOBTB3	SERPINE2	HLA-DQB1	PAPPA	LEFTY2							EPI-like	0.374988	0.227021	0.711422	0.218666	0.440326	0.370404	0.178187
CXCL12	ARHGAP29	FOXA2	MT2A	MT2A	MT2A	ACTG2	ADM	PTN	RHOBTB3	CDKN1A							Mesoderm-1	0.35982	0.193444	0.664111	0.206965	0.486059	0.390482	0.14057
AMOT	TSC22D1	MSX2	TGM2	RHOBTB3	HGF	TMPRSS11E	TUBA4A	CTNNB1	TNC	HEY1							Mesoderm-2	0.339858	0.186607	0.579189	0.222976	0.550292	0.412334	0.127637
PHLDA2	ID2	NPPB	NRP2	THBS2	UACA	APOBEC3G	TMEM88	CXCL12	GCNT4	GPC3							Endoderm	0.334723	0.188062	0.585791	0.24235	0.526024	0.467352	0.142829
DNMT3B	TBX3	MYL7	DKK1	APLNR	LRRC32	FOLR1	PIM2	PMP22	PENK	SPNS2							hPGCLC	0.36435	0.250881	0.594376	0.275344	0.472791	0.409427	0.207978
EPCAM	FN1	CITED2	SLIRP	CXCL14	PLP1	CASP3	SOX17	PLA2G16	TMEM37	ISM1							ExE-like	0.448046	0.385216	0.462915	0.391764	0.48319	0.366638	0.314984
ITM2B	ENC1	PMP22	GADD45G	ABCG2	DPYSL5	HMGCS1	PCSK1N	BMP4	ATP6V0D2	ACTA1
TMEM88	PPARG	TMEM54	PEG10	RDH10	PRSS1	FOS	RSPO3	PITX1	CST1	KIF26B								hESC-differentiated hPGCLCs (Chen et al.)
FABP5	LBH	CDH2	MT1F	NOG	NRCAM	PAMR1	TPM1	GRP	COL5A1	COL1A2								hPGCLC_d1	hPGCLC_d2	hPGCLC_d3	hPGCLC_d4
BMP2	TGFBI	FZD7	CDKN1A	CST1	HPGD	OTX2	EPAS1	CCKBR	DUSP6	PCDH17						Gastruloid	Ectoderm	0.694087	0.664708	0.619606	0.610441
WNT6	EZR	PEG10	TDGF1	RERG	TAC1	STMN2	CDX1	RGS5	RGS4	HGF							EPI-like	0.78591	0.751104	0.697806	0.673893
GAS1	POSTN	ARL6IP1	CCR1	GJA4	PENK	ARL4D	COL2A1	DSTN	THBS2	GREM2							Mesoderm-1	0.794023	0.751458	0.688732	0.660322
GATA2	TERF1	SFRP2	UACA	NPNT	CRYGN	CXCL14	PHLDA2	TUBB2A	CDH2	NRG1							Mesoderm-2	0.712855	0.672611	0.609362	0.584
HSPB1	WNT5A	ITGAV	MGST2	EFNA5	S100A6	NOG	FABP5	CALD1	EDN1	LRRTM4							Endoderm	0.792541	0.770443	0.697954	0.672798
CITED2	SPP1	PPFIBP2	HIST1H1C	TLR4	STMN2	RGS16	SFRP1	FGF19	YPEL2	OTX2							hPGCLC	0.870679	0.894981	0.824394	0.789922
DBI	PTGS2	OTX2	HOXB6	ZFHX4	PTCHD1	GPX2	WFDC2	FN1	KRT23	TMEM88							ExE-like	0.711412	0.657268	0.594301	0.577479
ANKRD1	HOXC8	CDKN1C	SAT1	FOS	SST	GLIPR2	C1orf105	CYR61	WNT2	PRTG
TOP2A	CENPE	DEFB1	HAPLN1	MMP2	ZEB1	FABP7	HMOX1	LINC00458	HES1	ERBB4								hESC-differentiated in 3D (Zheng et al.)
RBP1	TRDN	CKS2	DIO2	ENDOD1	NTS	CDKN1C	MALAT1	KPNA2	IGFBP5	ADM								hESC	3D-AMLC	2D-AMLC	MELC1	MELC2	hPGCLC
RPL22L1	PEG10	CKAP2	TMSB4X	SOX7	SHC4	LEFTY1	POU5F1	CD55	SGK1	ID2						Gastruloid	Ectoderm	0.756897	0.502559	0.540804	0.598411	0.620281	0.615936
WLS	NRK	DLC1	CYP1B1	GYPB	CDKN3	PBK	LUM	IGFBP7	APOA2	LRP2							EPI-like	0.878976	0.409281	0.486847	0.588092	0.557937	0.618531
CDK1	IFI16	ENC1	DDIT3	ANKS1A	USP44	TRIML2	RGS13	TSC22D1	CRABP2	AFP							Mesoderm-1	0.782937	0.404082	0.460683	0.680192	0.637022	0.639015
PDPN	CDKN1C	LARP7	EPSTI1	CDKN1A	MESP2	PLSCR1	SP6	EZR	PCDH7	SFRP1							Mesoderm-2	0.665629	0.365137	0.401563	0.805304	0.706264	0.569967
CCNB1	LZTS1	VGLL1	PIM2	NODAL	IQUB	EOMES	TFAP2C	MIXL1	TNFRSF11B	ITGA2							Endoderm	0.69127	0.386497	0.434019	0.693646	0.64046	0.68361
TINAGL1	NRP2	HOXA10	COL1A2	MME	TMEM88	PLK2	CTHRC1	NEAT1	NMU	HTRA1							hPGCLC	0.689155	0.457586	0.504605	0.546211	0.55762	0.835786
RGS5	LHX5	CTSV	BIK	LIMCH1	LITAF	MYL4	PMP22	SPARCL1	LMO7	FOS							ExE-like	0.584606	0.864985	0.861178	0.502171	0.571432	0.669587
PRTG	CRYM	IGFBP3	FAM162B	SLC40A1	DDIT3	FGF10	FABP7	CXCL1	AK4	TNNI1
PHLDA1	SHISA3	PITX2	APOC1	PAPPA2	CA2	FRZB	HSPB8	PEG10	INPP4B	EFNA5								6-10 dpf in vitro human embryo (Lv et al.)
AHNAK	SLC2A3	SFRP1	SNAI2	ABCA4	ANO4	ACAT2	MFAP4	STOM	CDKN1A	HAND1								PE	EPI	TE
FGF17	NODAL	AMOT	HAS2	ANKRD1	CHRNA9	VSNL1	CXCR4	GSTA1	GREM2	CRYAB						Gastruloid	Ectoderm	0.315928	0.302139	0.320041
PIFO	NPPB	CLDN4	DLL3	RGS4	OLFM3	LCP1	SOX2	SELM	CDX2	CYR61							EPI-like	0.197465	0.384288	0.342459
SP5	CENPF	AIF1L	ENC1	GPC3	SLC1A3	SERTAD4	ANKRD1	GADD45G	B3GNT7	HTR1E							Mesoderm-1	0.208839	0.389001	0.330485
ANXA3	PENK	TFAP2C	BMP4	FTL	ACTG2	IFITM1	S100A13	LCP1	TRPC6	CLDN4							Mesoderm-2	0.247518	0.383544	0.317576
FOXF1	MAFB	SOX4	TTR	LOX	FOLR1	APOC1	PRSS23	APLNR	FRY	COL6A3							Endoderm	0.226351	0.421418	0.323718
CENPF	ID1	DYNLL1	PODXL	CXCR4	CALCRL	HLA-DRA	SST	CITED2	SPARCL1	HPGD							hPGCLC	0.225046	0.413779	0.334203
DLX5	ANXA2	GADD45A	BMP2	CA2	PIFO	PDGFRA	APOC1	WFDC2	SOX11	ALDH1A2							ExE-like	0.26767	0.412171	0.451542
SNAI1	CDH6	GATA3	FABP7	APOA2	NPFF	UGP2	MESP2	EDNRB	RSPO3	TNNT2
CTHRC1	LGI1	TFAP2A	FLT1	SNCAIP	LIX1	CXXC4	SPINK1	DLX5	TNFRSF19	SOX6
HOXB5	HOXC9	USP44	PNP	FAM184A	UBE2C	CALB1	EPCAM	SERPINB9	TFPI2	NPY
DOK4	MSX2	IGF1	LYPD6B	TGM2	PVRL2	WNT8A	PDPN	CDX4	CXCL1	HES2
ERMN	SGK1	CDX1	BTG2	MTSS1	CTSK	CTGF	CRABP2	GMPR	SORBS2	EPAS1
GDF3	DLL3	KIAA1462	ID3	ERP27	STARD10	TUBA1A	PLBD1	PLBD1	GPC3	GLIPR1L1
MDK	CFH	SLC1A3	PRSS23	RCSD1	C9orf135	PMP22	CLU	PIM2	SLC8A1	APOA2
ATP1B1	TRIM55	COL1A2	LEFTY2	GLB1	FGF9	SPINK1	CYB5A	MT1X	FRZB	ITM2B
GATA3	PLA2G16	ATP12A	PLA2G2A	FAM49A	ZNF467	SFRP1	VIM	CTGF	AKAP12	PTPRZ1
SOX7	ANXA3	EPCAM	HHEX	LDB2	HDAC9	PCDH18	TMEM54	SLC2A3	CRYAB	KCNMA1
HEBP1	HSPB8	SH2D4A	SNAI1	PTPRE	BACE2	CAV1	CRYAB	MPC2	KIF21A	KRT18
IRX3	CCL2	SPATS2L	AFP	MTUS1	PLA2G16	MESP2	CD48	HSPB8	SAT1	LAMA4
LMO1	BMP4	SLC7A3	RGS2	PCDH9	DLG2	DUSP6	CYP1B1	RGS16	SLFN5	FILIP1L
MPC2	CNKSR3	FGF4	DDX58	VIM	CKB	EGLN3	SERPINB9	MT2A	IQGAP2	RABGAP1L
HMOX1	EOMES	PHLDA1	CLDN4	IGF2	RIPPLY2	IGFBP3	SPTSSB	METTL7A	PRSS23	PPARG
HOXB2	STOM	AMOTL2	HMOX1	SORBS1	MYL7	CSRP1	LHX1	LINC00678	MYC	CTHRC1
AURKA	FAM65B	CEBPD	RFPL2	NPR3	TM4SF18	TAC3	HGF	CRYM	PRRX1	NEDD9
FOLR1	ARHGAP15	SEMA6D	HGF	APOBEC3G	LYPD6B	CDX1	COL1A1	HMOX1	NES	RND3
MEST	ABCG2	CEBPA	TRPV2	WNT2	SPTSSB	PTPRN	FST	SAT1	MFAP4	KANK4
TRH	COL1A1	POSTN	SP6	ADAMTS5	C1orf53	CDKN1A	S100A10	FLRT3	FDX1	PRSS23
FAM89A	PLA2G4A	FST	KALRN	HTR7	HESX1	HIST1H2AC	USP18	CYB5A	VAT1L	ZNF804A
H1F0	TAGLN2	CGA	VSNL1	NRK	LOXL1	COL1A1	C9orf135	SFRP1	ITGA1	GREB1L
NOG	LEFTY1	GJA1	MYL4	DLK1	RFX4	HLA-DQB1	CXCL12	RSPO3	PLA2G2A	IGF1
NKX2-5	CXCR4	GREB1L	PLEKHF1	EGR1	GREM1	SEMA3E	HAPLN1	POSTN	ITGB8	CCKBR
NKD1	EDN1	HSPA8	TACSTD2	CRABP1	CXCR4	ARHGAP24	EDN1	CSRP1	EXPH5	IGFBP3
TBX6	GADD45G	RBP1	DAB2	ADAMTS1	PLA2G4C	LHX1	KCNMA1	GPX2	LAMA4	SGK1
DUSP6	DIO2	DAB2	CYR61	FRMD6	CSRP1	NPC2	RGS5	CA2	HAND1	TFAP2A
GADD45B	PDK4	PNP	LRRC32	FBXO32	SDC2	PLAC9	ANXA3	L1TD1	SCGB3A2	KCTD12
DUSP2	HHEX	ARL4C	GDPD2	PAPPA	CSF2RA	CCKBR	SOX7	DDIT4	MT1G	WIPF1
UBASH3B	SCGB3A2	ID4	SEMA3E	GNG11	ARHGAP28	GSTO1	HAND1	PDLIM1	TCF4	TAC3
HESX1	FLRT3	HEY1	SPHK1	VAX1	CCBE1	B3GNT7	PEG10	GCLM	IFITM1	MTUS1
EFNA1	TMEM88	HMMR	HIST1H1A	CFH	MYOF	ACTA2	AFP	IGFBP5	FGF4	COL5A1
PLK2	GATA6	NFE2L3	ID1	TRIM55	ARHGAP24	DLX5	STC1	TMEM54	TMTC1	ISL1
CALD1	CGA	PRC1	GPRC5A	GDF3	KRT19	RGS2	RP11-834C11.4	HMGB2	MFGE8	YPEL5
IGFBP5	SYT1	SLC7A2	TFPI2	SLC2A3	CPE	TFAP2C	NEFM	CLDN4	SLC28A3	PLK2
DAB2	MSX1	CDCA8	TMEM37	PLBD1	SORBS2	SOCS2	ID1	BEX1	ECM1	LRRN3
CRABP2	ASRGL1	MPC2	RGS13	NOV	CDK1	MEIS1	B3GNT7	TAC3	RASD1	LITAF
PMAIP1	S100A3	WNT2	CXCL14	SLC12A2	MYOZ1	LOXL1	NODAL	SOX2	ID2	EFNB2
HS3ST1	SPINK1	FOLR1	SLC39A2	CLIC5	LSAMP	HAND1	TUBB2B	CCNB1	MTUS1	GATA3
CXCL14	RAB15	CD200	LINC-ROR	FMOD	TSC22D3	NPY	SLC3A2	PSIP1	TRIM2	SPTSSB
IGF1	MDK	CKB	GPM6B	PPP1R14C	MGST2	SAMD3	ARL4D	FOS	ENPEP	STC1
S100A3	ACTA1	APLNR	SOCS1	NTS	COL11A1	SYT4	SOX21	MYL12B	TTN	TLL1
CDX4	GLIPR1L1	ZNF503	UBE2C	EPAS1	WNT8A	CRYBA4	PMAIP1	PLD3	SOX15	TINAGL1
FLRT3	WNT2	PSIP1	SGK1	TOP2A	MFAP4	KCNH5	BMP4	CDK1	HNF1B	KIAA1217
SLC2A1	RHOB	CDX2	EGR1	RUNX1	HBG2	ZNF165	APLNR	ENG	ENG	FGF17
HOXA10	S100A4	EZR	B3GNT7	UBASH3B	GCHFR	AMOTL2	FREM1	LY6E	JAG1	LRRC4C
MESP2	SERPINB9	CTHRC1	NMU	SH2D3C	UBE2S	SLC29A1	TACSTD2	NPC2	CLSTN2	FZD7
PHLDA3	PRKAR2B	GABRB3	ADM	PHACTR2	COLQ	S100A6	IER3	USP44	RGS13	MKX
SLC7A3	PTN	MSMO1	KRT7	ATP12A	EPHB6	ETV1	KPNA2	ID4	ACTC1	BCHE
OTX2	ANXA4	PRSS23	ODAM	PHLDA1	TDO2	UBE2C	TFAP2A	C5orf30	MEIS1	RUNDC3B
MKRN1	DMD	EFNB2	KIAA0040	RGL1	VCAM1	EFNA5	TNNI3	HES1	S100A6	COL2A1
SOX4	FREM1	PLS3	GAP43	FRZB	FBXO32	HLA-DRB1	GATA3	PITX2	KDELR3	PTGR1
VAMP8	NANOS3	PTTG1	AASS	NPPB	TCEAL7	TAGLN2	PHACTR1	CEBPD	ACTA1	CRYM
CD9	ID3	ALDH1A2	ERRFI1	GCNT4	IL6ST	TMEM37	PRRX1	SOSTDC1	RBM24	CDH2
BNIP3	SLPI	CRABP2	TBCA	TRPV2	CYP1B1	FGFBP3	FAM162B	GATA3	EGLN3	TDO2
NPM3	SIX6	DEPTOR	LINC00678	LAMA4	TMSB4X	FN1	CCNB1	CDKN1C	PEG10	FST
NODAL	ARL4D	UNC5B	LINC00643	PRICKLE2	GRPR	FAM71F1	TUBB2A	RPL22L1	CNKSR3	BTG1
PCSK1N	T	PRTG	NANOG	EPB41L4A	RDH10	GJA1	NRG1	IGF2	AMIGO2	CXCR4
LCP1	AK4	ZIC3	SOX17	AMOT	EBF2	TGFBI	CDK1	SNAI2	INPP5D	SOX9
MYL9	CCNG2	MESP1	SLC7A3	SLITRK6	GAS2L3	THY1	LTB	HAS2	MT1H	PRKCE
CLDN6	IER3	CD1D	GRP	BAALC	SPHK1	PDK1	RAB17	LBH	NEXN	CNTNAP2
IGF2	GSTO1	TMSB15A	EOMES	ADAMTS9	NKX2-5	C9orf135	CALB2	FABP7	AIM1	FOXA1
HOXD9	S100A6	RAB15	CDH2	MOXD1	IL17RE	EFEMP1	FXYD4	WNT2	GADD45G	NKAIN2
COMT	DPPA4	COL6A3	TMSB10	FILIP1L	LGI1	ANO4	S100A3	TMEM123	S100A9	DPYSL3
ERRFI1	NRG1	SP5	TUBA1A	C8orf4	HAPLN1	PRDM6	CRYM	HOXA10	QPCT	FGD4
CALB2	EPHB6	SOCS3	GYPC	CCDC3	KNSTRN	FST	KCNK12	PTS	KIAA0040	EDN1
TSC22D1	URAD	CCND2	CDX4	CHL1	PIK3R1	USP44	DEFB1	UGP2	RPS6KA5	MUC15
CA4	CDK1	GREM2	CROT	CREB5	LCA5L	POLR3G	FRG2C	SC5D	ATP1B1	PAPPA
ARL6IP1	MXRA8	MT1X	ENTPD3	IFITM1	MAGI2	CKS2	CGA	OLFML3	HPGD	TNFSF8
NUSAP1	FOXA2	AP1S2	ISL1	NRP1	DUSP2	UPP1	SHISA3	MYL4	KLF7	RAMP1
ASNS	PRDM1	SLC39A8	ARSE	ARHGAP29	ANG	TSC22D3	LINC00379	SGK1	SOCS1	NTS
CCND1	TMEM37	NRP2	FGF17	KRT19	HIST1H2BK	ECM1	MROH8	CYP1B1	WFDC1	ADAMTS6
CRABP1	ACPP	CDK6	ACTA1	MATN3	SLC39A2	PLA2G2A	C5orf30	FXYD4	GAS2L3	ID3
PCDH19	MYL9	HAND2	IFITM3	TTN	CCDC80	CKB	CEBPA	ERRFI1	CXCL12	VGLL1
IER3	DMRTA2	SOX15	CA2	BMPER	SHD	RSPO3	TGFBI	NCL	HES2	HAPLN1
CDH11	ITGAV	LGR5	PPP2R2B	OLFML3	CEP85L	ANXA3	GDF3	HOTAIRM1	MUCL1	ETS2
ATP2B1	ALDH1A2	ECT2	CADM1	LRRC32	FRMD6	DDIT3	RARRES2	PMAIP1	MRVI1	COL4A1
HAND2	KDR	THBS2	CTGF	TFAP2C	NPPB	RND3	CLDN4	RHOBTB3	ANXA1	UNC5C
EMX2	FST	HELLS	KIF21A	PLXNA2	CXCL14	DHRS2	PLA2G16	TMPRSS11E	EMP3	RPS6KA5
PLK1	WFDC2	TINAGL1	SORBS2	PRSS12	C16orf89	PPP1R17	ANXA2	B3GNT7	LITAF	LURAP1L
TNFRSF12A	HOXA9	DBI	FTL	P2RY6	PAX3	LAYN	NR2F2	NKD1	CHST2	KRT7
UPP1	PODXL	SPINK1	CAV1	EOMES	TUBA1A	MT1M	PENK	TFAP2A	CDH11	NDST3
SLC7A8	SVIP	ADAMTS1	RND3	DAB2	PPFIBP2	RAB17	TNNT2	CD48	NUAK1	PCDH7
VGLL1	GABRB2	CASP3	JUN	SPIN4	MRAP2	IVNS1ABP	AKR1C3	ISL1	SLC36A2	PMAIP1
RBMS1	CCR1	IFI16	NPPB	KRT8	SPRY1	COL5A2	PHLDA3	WNT6	COL4A1	KIAA0226L
GRP	SPRY1	NRG1	CTSL	KIT	CYP27A1	COL2A1	FEZ1	RHOB	RNF152	MBNL2
AFP	CXCL1	GRP	F3	LIFR	NEBL	PRDM1	CTSL	DKK1	CYR61	GSTO1
GLIPR2	CBR1	FOS	PHLDA2	CDH10	NR2F2	FEZ1	TNFRSF12A	ODC1	KCNN4	IER3
CKB	RGS4	MYLIP	MIXL1	CCL2	LRRC4C	GLIPR1L1	BEX1	GSTA2	PYDC1	IGDCC3
MAP1B	SAMD3	KCNJ13	THY1	CDRT4	LDB2	TNC	DLK1	ASRGL1	SEMA3C	ATP6V0D2
FGF4	MYL4	COL4A1	BST2	GLDN	WNT4	KRT19	KIAA0040	ANXA4	ZNF703	NEXN
ANXA4	CTHRC1	LOXL1	LURAP1L	SERINC5	TNNI3	LGR5	CYR61	GYPC	SHC4	NEBL
CDH2	GMPR	PGM1	ACTG2	TRPA1	PKDCC	CA4	CBR1	THY1	RP11-267L5.1	PMP22
PRDM1	CDA	TUBB2A	FOS	UNC13C	MPP1	B3GNT2	SLC40A1	GSTM3	NRCAM	CREB5
PITX1	HTRA1	FERMT2	BCYRN1	KIAA0226L	ARL15	C3orf58	SOX15	ACAT2	FAM43A	SOX2
LMO4	LRRN1	KANK1	NUCB2	GUCY1A3	ITGAV	KIAA0226L	LINC00261	LEFTY2	PALLD	PRODH
RDX	DCDC2	ADAMTS9	GSTA2	HCLS1	BMP4	PCP4	CALM2	PRSS23	ZEB1	SLC7A14
PDLIM1	RGS16	YPEL2	RGS4	TMEM100	RGS2	IFI16	CTNNB1	DUSP2	JUN	BMP2
GREM2	ERBB4	SET	QPCT	LIX1	DDIT4L	LECT1	FOXA2	ASNS	FAM49A	VAMP8
DDIT4	FOS	COL5A2	LRRN4	SLC9A9	BOC	HTR1E	ISL1	EDN1	CXCL14	GNAI1
JUN	SST	RBMS1	DLX6	SPARCL1	B2M	PLA2G4A	LAMA4	NUDT4	FOXH1	FN1
MMP9	CDH1	CDCA3	CDKN2C	ANGPT2	TUBB2A	OLFM3	MGST2	GLIPR2	FHL1	PCSK9
MTUS2	TFPI2	SERINC5	GFPT2	THSD7A	GATA2	WNT5B	EMB	RP11-834C11.4	FRMD6	LMF1
PRC1	DDX58	SYT4	GATA6-AS1	SAMD3	FILIP1L	VAMP8	CD9	ERMN	ACTG2	EFEMP1
WNT5A	HVCN1	MBNL3	OLFM1	ENPEP	NCALD	SLPI	TOP2A	BIK	PAG1	FREM2
PCP4	TMPRSS11E	SLC2A3	ANGPTL4	PLA2G4A	SLC20A2	EGFLAM-AS4	ID3	CDX1	RGS3	VIM
ID4	TRPA1	ZIC5	PDLIM2	RASGEF1B	LRP2	PLP1	TUBA1A	WNT5A	EPB41L3	MYOCD
GNB4	CAMK2N1	DNAJC15	BEX5	EGR2	AKR1C3	SFRP2	PKM	LINC00379	HHIP	MBNL3
GSC	DDT	CAPN2	CRYBA4	GRB14	FAM162A	FLRT3	BTG2	MRS2	HAS2	EOMES
PPP1R17	TBX6	HEBP1	TINAGL1	INPP5D	TM7SF2	ANGPT2	LINC00678	LEFTY1	PRDM14	BMP4
BST2	FSHR	LITAF	ITM2B	STK31	ADM	PTN	MSX1	RPS27L	CACHD1	LHX1
ARID5B	PYCARD	ATF3	ENG	C1orf115	PTN	KPNA2	GSC	LRRN1	ETS1	EFNA1
NPY	MRS2	HOXA9	ACKR3	ACTG2	NDRG2	RHOU	CLDN6	NANOG	POSTN	LSAMP
IGFBP4	CYR61	NR2F2	CRHBP	TNC	LAMA4	MT1F	TRIM55	CD9	LAMC2	SEZ6L
NRP2	TCEA1	SOWAHA	CDX1	LPAR6	MUCL1	EGR2	HES4	CKS2	FAM46C	FOLR1
SPP1	HEY1	GPRC5A	HTRA1	ELL2	ACPP	NPY1R	MYL9	SFRP2	IFI16	TCF4
ADAMTS9	CHST9	GRHL1	KIT	SHC4	NTM	CDK1	MUC15	FAM89A	NUCB2	MAGI2
CDX1	ITM2B	BUB1	CCKBR	NUDT4	SAMD3	RBM24	CDH6	CKB	GCNT1	PCDH9
NR0B1	TLE4	GFPT2	RPS6KA5	SRY	IFI16	HIST1H2BK	MT1F	DGCR6	GATA6	MLLT3
SOCS2	TTC29	COL1A1	SYT6	IL6ST	TFPI	FIGN	T	RASD1	OLFML3	NANOS3
CDC20	SP6	PPIC	WFDC2	ELMO1	NANOS3	FGF17	TMPRSS11E	B2M	IFI6	CTSL
FRZB	CBR3	TAC3	TLR4	KDELR3	MOK	PHACTR2	PITX1	DNAJC15	LRRC32	DLC1
CALM2	SPNS2	TUBB6	FAM110A	MEPE	MAP2	QPCT	TFPI2	PRDM1	CLDN11	PRR15
EIF4EBP1	BMP2	CREG1	ANXA4	RGS2	KPNA2	S100Z	DDIT3	CRABP2	HEY1	SLC17A8
LMO2	PMP22	LRP2	VCAN	MGLL	TSPAN5	PPP1R14C	SELM	H1F0	PGF	SH2D4A
TPM1	PGM1	NUSAP1	MEST	FREM1	LIMCH1	GRP	GATA2	ALDH1A2	COCH	POU5F1
LEF1	KLHDC8A	UACA	SCGB3A2	CHN2	SNCAIP	SGK1	NANOG	VTCN1	C8orf4	RAB11FIP1
DLC1	KCNMA1	CTNNB1	TRIM2	ARHGAP28	ID3	CAPN6	EPSTI1	PRTG	HSPB1	KRT80
SLC39A8	MKI67	ANKS1A	ENO2	COLQ	GSTA4	RGS5	FAM49A	RAB3B	EPHA4	MSX2
CENPE	AFP	FOXH1	GLRX	FLRT3	SGK1	MCC	ATP1B1	SLC7A5	SLCO2A1	EPHB6
PALLD	TACR1	TMSB10	GLDN	ABCA1	KALRN	HEBP1	LCP1	CDX2	FLRT3	NBEA
SOCS3	PDGFRA	PHLDB2	TRH	AKR1C3	DOCK2	NQO2	CXCL1	AIF1L	VASH2	PRRX1
PPFIBP2	TGM2	HOXB3	LINC00479	PRTG	SLITRK4	FGFBP1	TRH	EGR1	CDKN2C	PITX1
FGFBP1	CNTNAP2	TP63	SERPINB9	CCDC80	NDST3	EPSTI1	HOXC6	GADD45A	CGA	ANGPT1
IRX1	ADM	WNT6	CSRP1	TTC29	PTPRN	HIST1H1A	GCLM	HSPD1	PTGER3	MESP1
WNT5B	PLK2	SP6	HOXA10	LGR5	ADAMTS6	COCH	CALD1	UBE2S	PDLIM2	BACE2
AK4	RPL22L1	WNT5A	COL1A1	OLFM3	TNMD	IFITM3	PAPPA2	TCEA1	NR2F1	EBF2
MSMO1	PCDH17	CLDN6	ZNF165	ARL4D	KIAA1462	FGFR1	TAGLN2	GJA1	PITX1	TEX14
COCH	LPL	UBASH3B	FGF19	CRH	ARRDC2	GUCY2C	CCDC80	ARL6IP1	ITGB5	WFDC1
FOS	GAP43	TGFBI	NRP1	FSHR	IGF1	SEMA6D	CD47	SEPP1	DUSP4	LGI1
GYPC	GAS1	ERRFI1	ARL4D	ETS1	MTSS1	ACO1	PCP4L1	RAB15	KCNV1	TRABD2B
H2AFY2	ITGA2	GPC3	UPP1	MYOF	GPX2	TMSB10	EMC10	IL17RE	NTM	GRHL1
PERP	ASPM	NRK	GPNMB	FREM2	ODC1	BEX1	WNT6	ADM	CCL2	BHLHE41
COL4A1	PPFIBP2	CADM1	CA4	GRPR	BUB3	MALAT1	CNKSR3	PLK1	DENND2C	CEBPD
CDKN1A	CDKN1A	CCND1	GAD1	S100A4	WLS	MANEA	GSTA1	HOXB5	TBX3	WNT2
SIX3	NANOG	MEST	LARP7	SEMA5A	INPP1	CDC20	ALDH1L1	MPZL1	DCLK1	SULF1
GCLM	DPYSL3	CLU	GSTA3	BNC2	DGCR6	ABHD12B	SCGB3A2	HOXB2	ABCA1	GSC
GAP43	NUSAP1	AMOTL1	CALB1	CTHRC1	DAZL	PIF1	TTC3	SESN3	SLC4A8	ABCG2
TRIML2	DLGAP5	CDCA2	FAM49A	MAP2	RGS4	BMP2	EDNRB	UBE2J1	DKK2	CCDC160
FGF10	MAGI3	CCKBR	COL4A1	ITGA2	GUCY1B3	SCG5	GSTA2	SLC2A1	CCND1	DNMT3B
SKAP2	SPATS2L	FOXC1	MAFB	EFNB2	S100A4	TNNT2	TRDN	ABCG2	CLIC3	ZNF385B
RASGRP3	SOX15	RAB3B	GAS2L3	CLDN4	COCH	ABCG2	TBCA	HOXB8	SDC2	GABRB3
ARL4C	SLC4A8	MDN1	RHOB	SOSTDC1	ITGB5	LCK	CTGF	EFNA1	IDH1	IFI16
SMAGP	LOXL1	TSC22D1	CD55	ATP8A1	DOK4	CDKN3	DUSP4	MFAP4	SP6	RGS16
FERMT2	NQO2	PDLIM1	FGF4	APOL3	PRPH	LDB2	SFRP2	MESDC2	TSC22D3	PITX2
EMB	OTX2	HOXB6	SOX15	VCAM1	TPM1	VAT1L	SOCS1	MAFB	CDA	ACKR3
AASS	ECM1	VRTN	SUSD3	HGF	S100A10	CHRNA9	GPC3	MT1E	ASPM	SORCS1
LITAF	RAB3B	MTUS1	EDNRB	THRB	MGLL	WFDC2	AIF1L	C11orf96	DAB2	ZFHX3
PTGER3	CST4	CDKN3	USP18	ACVRL1	GAD1	NKAIN4	DDIT4	TRIM55	LMOD1	PCP4
GPRC5A	MFAP4	GSC	EGLN3	MRAP2	FLRT3	TMEM123	DUSP2	POLR3G	SLC1A2	GABRG3
PDGFRA	PTPRZ1	PRRX1	NDRG2	C1orf56	MYRFL	ARL6IP1	MAFB	JUN	HOXA10	IER2
TUBB2B	DSP	VAT1L	PCSK9	SGK1	NUDT8	RAB38	HS3ST1	NUDT11	TNFSF15	ADAMTS9
LPAR4	KIAA1324	PRSS35	TPST2	PLP1	CNTN5	RDH10	IRX6	HGF	FGF9	RHOU
RIPPLY2	PRSS12	KIF4A	PRR15	STOM	LAYN	DUSP2	BNIP3	PPARG	ATP2B4	PLCL1
PPIC	PMAIP1	COL5A1	MYL7	LMO7	TAC3	ODAM	KCNK10	RPRM	VSNL1	TYROBP
PCDH7	PTHLH	ZFP36L2	C5orf30	CRYM	FRY	LRRC32	SLC2A1	MKRN1	RGS2	CITED2
F3	PLSCR2	KIAA1551	EPAS1	INPP4B	CDIPT-AS1	GAD1	MFGE8	GSTA4	ANGPTL4	RNF152
RUNX1	SYT4	PTGR1	CALM2	EPHA7	CENPA	SLC7A3	DIO2	PERP	ITGAV	RSPO3
TAGLN	HGF	AURKB	KRT80	CNTNAP2	TRIM55	PRTG	ABHD12B	H2AFJ	LDB2	FGD6
DDIT4L	PRSS23	ARHGAP18	CYB5A	ARHGAP27	CDH10	C1orf61	S100A9	CD99	KIT	NR2F2
SDC4	COLEC12	VAMP8	CHI3L2	CUZD1	TNC	PSTPIP2	C1orf61	SDC2	GLIPR2	HESX1
UNC5C	PTS	GSTO1	LAMA4	ACTA1	LMO7	KLF7	TDO2	TMEM37	MPP1	MYL9
TTR	TAC1	NTS	LIX1	TACC1	SLITRK6	GABRG3	SERPINF1	MFGE8	DDIT4	COL11A1
DPF3	CRABP2	ITGB5	HIST1H2AH	FGF17	CALB2	CDX4	FGFBP1	CLDN11	SOX4	ID1
L1TD1	SSTR2	FGF19	HES1	TMEM150C	CBR3	KDELR3	HOXB6	MMD	CLU	FBXO32
LGI1	NRG2	IGFBP4	CDH11	B4GALT1	HOXB6	RDH12	HOXB-AS3	DPPA4	NODAL	PALLD
LIMA1	CCNB1	TAGLN	PAPPA	LRP2	CLDN4	ALDH1A2	OLFML3	ACPP	PRODH	CDX2
ACKR3	BEX1	PITX1	PKDCC	CCKBR	HOXB-AS1	ID3	POSTN	SOX4	FOXF1	S100A13
PENK	ATOH8	ANP32B	RAB17	MANBA	PGF	EDN1	FAM110A	HIST1H2BK	CHST9	COL5A2
HIST1H1B	TFAP2A	PAMR1	IDS	GAS2L3	CRYAB	DNAJC15	GSTO1	CDKN1A	TUBA4A	GREM1
PSIP1	PCDH10	KCNV1	LBH	TDO2	NRP1	IFFO1	HOXA10	MEST	CHI3L2	FAM20A
PDGFA	CCBE1	SLC7A11	KRT19	LRP1B	INPP4B	CDH10	ANGPTL4	NEFM	ANKRD1	CDH11
RHOB	MEIS1	FOSL2	ITGA5	CDH18	FAM64A	UNC50	PHLDA1	SOX7	PRICKLE2	FMOD
HOXA1	PPP2R2B	RRM2	ANXA3	SLCO2A1	TSHZ2	SERPINF1	PIFO	ATP1B1	WT1	CA12
PYCARD	PCDH19	NQO2	SLC39A8	RFPL2	NUSAP1	CCNE2	CA2	TMSB15A	KRT7	FLT1
NPC2	CRYAB	KCTD12	ATF3	MAP1B	FRZB	FGF11	TGM2	ANKRD1	LRRC2	NRIP1
FOXC1	CD55	GZMK	LRAT	SLC36A1	MDK	CDX2	AKR1C1	EIF4EBP1	SLC7A11	CTSV
MAF	HOXA10	MYOF	S100A4	IGF1	ENPEP	TAC1	GMPR	SHISA3	ZC3HAV1	KRT8
HOXD1	ERRFI1	BTG1	KCNN4	TMPRSS11E	LBH	S100A11	SOSTDC1	TOP2A	KIAA1551	F3
SLC3A2	FOXC1	SPRY1	TAGLN	ALDH1A2	PIEZO2	GDPD2	HEY1	C16orf87	CALB2	SEMA3E
DLL1	CEBPD	JARID2	EFNA1	UACA	ZFHX4	RASSF9	NKX2-5	CCDC3	FAM64A	PODXL
GLRX	CCKBR	TMEM123	DPPA4	AHNAK	OLFML3	CRYM	FOS	GLB1	FABP7	KCNN4
TDO2	CDH11	AP3B2	FST	MITF	GPM6B	CCNB1	NUDT11	DNAJC1	GJA1	PDE4D
WFDC1	PDCD4	ETV1	HESX1	LHX1	NKAIN4	NCALD	RP11-455F5.3	ACTA2	MYL9	PCDH8
BUB3	ERMN	ABCG2	AKR1C3	LIMA1	TGM1	HHEX	RHOBTB3	HEY1	LRP2	GADD45B
PLS3	TNNT2	DTL	S100Z	DNAH6	NRXN1	PLK1	HBG2	TM7SF2	MME	MEST
APOC1	CLDN4	SST	FOXH1	HECW2	C9orf3	CRABP1	RAMP1	AHNAK	RORB	TRPA1
CA8	RFPL1	EGR1	GLIPR2	TNFSF8	RGS3	PLD3	CTD-2035E11.4	FGFBP3	EPHB6	PLAC9
CXCR4	COL6A3	ELF3	FDX1	KLF3		RALB	P2RY6	PLP1	SNAI2	NAP1L3
TFAP2A	SLITRK6	TACR1	TSC22D3	FAM84A		UTS2	ASRGL1	LMNA	EGR1	LIMCH1
MBNL2	ZAP70	PEBP1	KLK13	CDH11		CYP27A1	NR2F1	HOXC6	SALL1	DEFB1
POU3F1	RGS13	TFPI2	LHX1	MXRA5		LZTS1	PODXL	DOCK2	GPRC5C	TMPRSS11E
SOX9	HOXA1	WBP5	CLIC3	RGS16		BMPER	SLCO2A1	HLA-G	EPAS1	GUCY1A2
CDA	YPEL2	FOXF1	FXYD6	COL25A1		ALX1	CENPE	CDH11	ANGPT2	RGS2
AK1	CLIC3	PCP4	CDX2	ATP2B4		ACTC1	MGLL	GADD45B	CPEB4	MATN3
FGF19	DENND2C	HESX1	TUBA4A	ISL1		CEBPZ	CA12	SAMD11	NOG	INSIG1
FXYD3	CAV2	SH3KBP1	FOSL1	TFAP2B		SCGB3A2	SEPP1	EGLN3	KDR	MYOZ1
BCAT1	DNAJC1	ACTC1	ATP1B1	TRPC6		FEZ2	DGCR6	CBR1	ADRA2A	PRSS35
IQGAP2	SUCO	TMEM150C	LUM	FYB		HTRA1	TERF1	TNFRSF12A	LEFTY2	LOX
PKDCC	CEBPZ	TTR	PRSS12	KRT18		GABRA3	SPINT2	KIF5B	KALRN	ADRA2A
HIST1H1C	AIM1	RAB31	LINC00958	SNAI2		TRH	CDH11	PRODH	IFFO1	CCBE1
TUBB6	DUSP2	NREP	KDR	GUCY2C		ARRDC2	SGK1	NASP	FOXA2	EZR
LPL	CHRNA3	FAM65B	GJA1	ADM		TUBA4A	KCNMB1	WBP5	SERPINB9	SFRP2
TPD52L1	PGF	MYL4	C6orf141	GFRA1		INPP1	ARHGAP24	LECT1	PTGS2	PLEKHF1
TACSTD2	ZFHX3	RAB25	HIST1H2AC	EREG		RGS4	PRSS12	MSMO1	CNR1	CCND2
LTB	SOX6	HSPB8	CBR3	GRHL1		KCNK1	WNT2	CDH1	HLA-G	NANOG
SEMA6A	TUBB2A	GPX2	ANKRD45	DDIT4L		ANXA2	ITM2B	T	DPYSL3	TCF7L2
CLDN3	L1TD1	MUC15	TNIP3	TP53INP1		GLB1	PRKCDBP	GOLM1	FBXO32	LGALS1
SFN	HOXB5	PHLDA3	SPATS2L	PPFIBP2		BUB1	LYPD6B	SOCS3	SMAD9	HAND2
SOX21	LIFR	PAQR8	RGS3	ALPK2		RGL1	MPC2	ENC1	TFAP2C	ADAMTS1
SLC16A10	NOG	PRDM14	LOXL1	ASPM		GFPT2	CDC20	WNT5B	MEST	GLIS3
DLX2	DSEL	LRRC32	PTGR1	SLC7A2		TNFRSF12A	KCNJ13	HLA-DRB1	ATF3	SLPI
PCDH8	COL11A1	ATP2B4	PIM1	GRAP2		AURKA	ABCG2	ENO2	CYP1B1	PRLR
LIX1	ADAMTS9	ANG	HHLA1	PAMR1		PEG10	MEST	CDC20	SOX17	EXPH5
RASD1	VTCN1	HSPE1	CD1D	AMIGO2		CA12	DLX2	PTTG1	DTL	TM4SF18
NRP1	PRC1	HOXA1	RAB38	CXorf57		RERG	GATA6	GCHFR	PLOD1	TRDN
SPARCL1	ZIC1	TMEM88	IGFBP4	ENPP4		BCHE	HPSE	DMRTA2	CREB5	DAAM1
ELF3	HMMR	CACHD1	CPEB4	AKAP12		GMPR	FTL	B3GNT2	BAMBI	PTN
ARHGAP10	IRX3	MPP1	SLC4A8	SEMA3D		LRRTM1	GJD2	SLC39A8	LSAMP	PAG1
PTN	AVP	RGS4	H2AFY2	KPNA2		RPUSD3	SESN3	BMP2	ARL4D	PIEZO2
CLIC5	RND3	TXLNG	PGF	RFX4		KIT	PTS	MEIS2	CA4	ALPK2
KIF5B	MPC2	SLC28A3	ASNS	PDK4		HEY2	HSPB1	SOCS2	PRELP	DLL1
DNAJC1	ID4	ZFP36L1	ADAMTS1	KALRN		CENPA	RHOB	DLK1	CAV2	FAM110A
MYC	TMOD1	MSX1	RHOBTB3	LYPD6B		AP1S2	FOLR1	RBP1	CYP26A1	ENPEP
RGS16	CNTN5	HGF	IGF1	SLC8A1		IL6ST	AURKA	CRYAB	GNA14	ANKRD45
MT-CO1	RCSD1	DNAJC1	HOXA11-AS	LRRC4C		HIST1H1B	CENPF	LYPD1	LOXL1	USP44
HMMR	ENPEP	RGS2	PPP1R17	GMPR		CXorf57	DOK4	EFEMP1	FAM84A	IGFBP7
IRX2	EFNA1	WT1	HOXA9	C4orf32		TERF1	FZD7	CCND1	FMOD	ADAMTS18
KDELR3	LAMA4	BACE2	BACE2	ADAMTS18		POSTN	TNNI1	RAB17	ELF3	TNFRSF19
UBE2S	LRRC32	ABCC4	WNT5A	PTGS2		HTR7	ASCL4	HMGCS1	ALPK2	CD200
SUSD3	LRRC23	UBE2J1	PRSS35	ANO4		RASGEF1B	HNF1B	YPEL5	SOX2	SCN4A
ARL4A	MMD	NDC80	ERP27	PLSCR1		TOP2A	NOG	GATA2	HTR7	TFAP2C
CHCHD10	HOXA7	ASPM	CCL2	TAGLN		PRC1	SFN	DUT	SPP1	KCNH5
SLC16A3	AIF1L	CCNB2	BNIP3	GRP		GLRX	CDC42EP3	CEBPA	LURAP1L	NRXN1
HMGCS1	CALCR	INSIG1	SPIN4	MAF		CEACAM19	JUN	PRRX1	SEMA6D	CHRNA9
LGR5	TCEAL5	NRP1	FAM43A	PHC1		SLCO2A1	PLK1	LIX1	ZNF804A	ITGA1
GFPT2	TTR	CREB3L2	FOXF1	RHOU		CNKSR3	SH2D4A	DLX2	ID3
GPX2	RABGAP1L	SAMD3	CXCL12	DYNLT3		CROT	GJA4	SMTNL2	PAX8
WNT8A	SEMA3D	KRT80	DOK4	HTR1E		CRYAB	SOX11	SCGB3A2	SESN3
CCND3	EFNA5	FGFR1	SBSPON	DSEL			PDLIM1	ARHGAP29	SLITRK4
KLF5	SPATA16	PKP2	TAGLN2	KCTD12			GADD45A	MSX1	DNAJC15
MT-ATP6	PIFO	SKIL	GMPR	GABRB2			COL1A2	FEZ1	GRIK2
PRKAR2B	SFRP2	EPB41L3	ZIC3	ALDH1L2			SMAGP	PODXL	MUM1L1
LMNA	RAB11FIP1	PKDCC	SPINK1	INPP1			RAB15	HAND2	DLC1
RABGAP1L	KRT23	SEMA3C	BICD1	TSC22D3			LZTS1	HOXA9	MBNL3
SLC1A3	LITAF	SOX21	SLC2A3	RSPO3			NNAT	PIFO	GSTO1
RAB17	MANBA	NUDT11	NRG1	EDN1			CDH1	CCND3	STOM
MBNL3	CEBPA	RHOU	CYP1B1-AS1	COL5A2			CPE	HVCN1	MT1X
SEMA6D	PIF1	ACTA2	IFI16	LBH			HLA-DQB1	EOMES	ADAMTS9
FXYD6	NR2F1	BCAT1	FGFBP1	MUM1L1			ERRFI1	SEMA6A	PLEKHF1
LHX5	GREB1L	FRMD6	LIFR	RNF19A			PITX2	AP1S2	TSHZ3
DAZL	GDPD2	FXYD3	MYC	BACE2			CHI3L2	PGF	GABRQ
MCOLN2	AMOT	AMER2	TNMD	ARHGAP40			NRP2	SLC16A10	ZIC2
CAPN6	CA12	ISM1	DHRS2	ITGB1			EZR	SMAGP	PHLDA2
LRP2	GJA4	TGM2	KLF3	SORCS1			PYCARD	RPUSD3	PRLR
ECM1	GNB4	SLC40A1	SORBS1	COL4A1			ERBB4	GATA6	MITF
NCL	MKX	TXN	NMRK2	FOXF1			RGS2	DNMT3B	COL23A1
SCT	ZIC2	EIF4EBP1	CCNE2	POU3F2			GADD45B	JUP	TPST2
SLC40A1	HOXB7	KIF21A	PDPN	CALD1			PPARG	CSF2RA	DUSP2
B2M	IRX1	PTCH1	TCEAL7	VGLL1			DKK2	CCNG2	SCN9A
STARD10	KIF5B	TMC5	BHMT	SEPP1			HSPA8	TRPV2	CSRP1
PTHLH	LGALS1	B3GNT2	AMBN	FBN2			RASD1	SOCS1	NRP1
PRPH	SLC40A1	SIX3	IER2	ZNF165			FAM43A	DIAPH2	MMP2
AURKB	SOWAHA	FOXA1	RRM2	CNR1			LYPD1	RGS2	CRHBP
GRB10	PSTPIP2	ARMCX3	COL6A3	HAND1			PLD3	PRPH	TP63
ALX1	MEIS3	TTC3	IDO1	EDA			COL4A1	SP5	AP1S2
ITM2A	NCL	NCALD	TBX3	HNF1B			FAM84A	CENPE	SATB2
GADD45A	CTNNB1	DDIT4L	CLU	KCNMA1			MYC	CALB2	DST
ENG	ZMAT4	MTSS1	MBNL3	HSPB8			B4GALT1	SOX11	TNFRSF12A
INPP1	DNAH6	HOXD9	P2RY6	SEMA6D			NKAIN4	H2AFY2	TMOD1
CNTNAP2	LYPD6B	HEG1	DEPTOR	PTGR1			SDC2	FOXH1	ZIC3
HOXB8	KCTD12	PGM5	KLKB1	FAM196B			EMP3	C1orf105	KCNMB1
PSORS1C2	FAM89A	TACSTD2	NPY	PRSS35			ATP12A	PHC1	SPHK1
FOXB1	BMPER	RBM24	ANKRD37	L1TD1			SLC7A5	FAM122C	CARD6
SPATS2L	SH3BP5	VCAM1	NR0B1	CSRP1			CSRP1	TMEM64	FAM13A
HEY1	FGF10	TCF4	FZD7	LRRN3			HOTAIRM1	TPD52	SCN3B
CAMK2N1	LYPD2	SUSD3	CAPN6	ZEB1			CA4	TBX3	FAM83D
MT-ND4	CKS2	ATP6V0D2	SHISA3	COCH			PRR15	ATF3	SEPP1
TPST2	CDH18	B4GALT1	MPP1	C5orf30			HOXB2	ZFP36L1	TACSTD2
FLT1	WNT5B	SORBS2	AP1S2	TNFSF15			CCBE1	FFAR4	PIM2
FHL1	ZFHX4	S100A13	MTSS1	PLCL1			CITED2	CTHRC1	FAM122C
TFPI2	WNT6	KLF5	CST4	IFFO1			CENPA	IFI16	KANK1
PDK1	DEPTOR	HEBP2	CST2	MCC			SNAI2	FAM159B	OTX2
ATF3	BST2	ITGA1	GSTA1	KANK4			FOXH1	LHFP	BEND4
ACTA2	FFAR4	SLFN5	GATA2	SLC39A8			UBE2S	KCNK12	SOX9
JAKMIP1	GSTM3	LAMA4	ANKRD1	DLX5			CCND1	MYC	MLPH
KALRN	YPEL5	FAM126A	INPP5D	NUSAP1			EGLN3	PGM1	MOBP
PIM1	LRRC38	EXPH5	TGFBI	GLRX			HAND2	DUSP6	CDH6
VAX1	SEMA6A	PLCL1	MUCL1	MANEA			PIF1	FBXO32	TNS4
VRTN	PAMR1	SMAGP	ITM2A	GATA6			SBF2-AS1	ZIC2	LRRN1
B4GALT6	ACADL	MAD2L2	VASH2	ARHGAP31			NUDT4	CDCA7L	LPAR6
CREG1	NKD1	HNF1B	VAT1L	SMARCA2			RP3-428L16.2	GAS1	CENPF
TUBB2A	EMP3	KIT	GADD45A	CDH2			TAC1	SCPEP1	ELL2
C11orf96	SLC1A3	BMPER	KLB	GRAMD1C			LIX1	TRIML2	MMP9
CHRD	GFRA1	CDKN1A	CEBPD	KCNJ13			CAV1	HPSE	CTSV
SLC28A3	DNMT3B	NMRK2	DSCR8	ANGPTL4			FXYD6	SH3BP5	FAM110A
MPP1	ANGPTL4	ESRRB	MTUS2	HEY1			HMGB2	CD1D	GALNT18
CCNE2	NPNT	FBXO2	MALAT1	RAB15			ANXA4	RP5-899B16.1	ZEB2
RERG	NDST3	EPSTI1	INSIG1	GLIPR2			C1orf115	PTPRS	CAPN6
ZIC3	LRRN3	GPRC5C		OSBPL9			UPP1	DDIT3	SKIL
S100A13	TFAP2B	FAM110B		CA12			WNT5B	DLL1	PDLIM7
HOXB7	DGCR6	TBR1		CHRNA3			L1TD1	ACO1	SHROOM3
IRX5	FAM43A	PMEL		LGI2			AHNAK	SBSPON	GSTA2
GCHFR	HES2	MRVI1		CDK6			ANGPT2	NKX2-5	MVD
RBM24	ALDH3A2	SORBS1		ROBO2			TRIML2	PHLDA1	COMT
ARHGAP18	OTOR	NR0B1		CAPN2			THY1	VAMP8	GAS1
GJA1	BICD1	ECM1		GSTA1			RP11-318C24.2	MXRA8	ATP2B1
SORBS2	RASGRP1	NSG1		FAM20A			NFE2L3	LURAP1L	CROT
SLC16A6	SNAI1	PVRL2		B3GNT7			SP5	RP11-445F12.1	MGLL
NTF3	GNAL	COL23A1		GRHL2			HOXA11-AS	SLC12A2	CLIC5
PRSS35	GOLIM4	KHDRBS3		DNMT3B			FAM159B	HEBP1	SLC5A3
LPAR6	PKDCC	SNCAIP		NRP2			STOM	SPSB2	HLA-DQB1
SLC29A1	CRABP1	DUSP4		AFAP1L2			CKS2	HIST1H1C	LIFR
TNFRSF19	FDX1	USP28		TDGF1			PYDC1	PRSS12	SOCS3
ETS2	SOX4	CHRD		ELF3			CALB1	AURKA	HDAC9
FOSL1	POU5F1	TPST2		ACPP			TMEM37	PALLD	RP11-297M9.1
FBXO5	FERMT2	BTG2		BHMT			APOBEC3G	IER3	RP11-10A14.6
C2orf80	RBP1	GRHL2		NNAT			TMEM150C	HOXB-AS3	TLR4
LRRC38	ARL6IP1	SBSPON		FOXC1			ENC1	HIST1H2AC	SFRP1
ZFP36L2	FGF4	ENPP4		DDX58			C9orf3	IGDCC3	ADAMTS6
ACTG2	STC1	DMRT3		ZNF804A			TRPV2	COMT	FABP5
EGR1	RBM20	RUNDC3B		ENTPD3			FLRT3	S100A4	PLK1
ZEB2	CDH2	ZNF703		EDNRB			RIPPLY3	AK4	COL25A1
RDH10	PCDH7	HERPUD1		ADRA2A			FAM65B	GPM6B	BHLHE41
NAV2	IDO1	ITGA5		BMP5			RGS4	NRP2	MTSS1
CD200	NNAT	PTPRN		AKR1C1			NMU	IER2	HMGCS1
EFEMP1	TINAGL1	PDHB		ITGA5			FLT1	HS3ST1	ATP12A
PTCH1	LRP2	CSF3R		PPARGC1A			CDX2	CCBE1	MYLIP
TMEM100	MARK1	IRX2		LGI1			CSF2RA	PHOX2A	KCNMA1
JADE1	GREM2	ARL15		DUSP4			TMSB4X	URAD	MT1F
GNG11	DNAJC15	LRRN4		VWA5A			ATP2B1	DACT1	VWA5A
PKM	PTGR1	RALB		IGFBP4			UBE2J1	MYL7	KIF26B
MYOF	CCND2	CCR1		PALLD			HOXC9	TPST2	TM4SF18
GJA4	FZD7	HLTF		RDX			OTX2	MYLIP	KRT80
DACT1	DLX2	SOX11		SDC4			BIK	INSIG1	GRHL2
SYNGR1	BOC	TRPV2		ERMN			IRX3	COL1A1	TPBG
IQUB	LHX2	CDKN2C		KIFAP3			CACNA2D2	CST4	HAPLN1
TBX2	ADAMTS6	FGFBP1		CENPE			HIST1H1C	ITGB1	PREX2
NKX1-2	SLC2A1	PLEK2		CDKN2C			TFPI	HOXB9	HOXA9
AP1S1	PHLDA2	RNF152		ELK3			GLIPR2	TRIM2	MKX
JUP	GTSE1	DENND2C		DOK4			TM7SF2	CENPF	CALM2
EPS8L2	KIAA1217	AKR1D1		HTRA1			MKRN1	RAB25	DEPTOR
ANKRD37	CKAP2	UTS2		UGP2			TDGF1	HOXA1	NREP
SMTNL2	SLC17A8	PBK		PAX3			RAB3B	CENPA	ABLIM1
LYPD6B	GREM1	GDF6		MYL4			ZFP36L1	RAMP1	PLP1
COL23A1	UBASH3B	KLF3		PMAIP1			PRDM1	SOWAHA	RASGEF1B
HNF1B	B3GNT2	FDX1		DMD			HOXC8	LZTS1	CPE
ATP8A1	ZNF503	PDCD2		CGNL1			ALDH1A2	EPB41L3	TRPA1
CDCA2	KIAA1462	ABCA1		SLC16A6			GUCY1A3	UPP1	MACC1
PHC1	HEBP2	LRRC17		PTCHD1			PLAC9	LGALS1	ETV1
EN1	PRODH	SULF2		AASS			LRRN1	CEBPZ	LINC-ROR
MTUS1	CDX1	MXRA5		SLC7A11			HHEX	BST2	RAMP1
UACA	HEBP1	SHROOM3		S1PR3			CCNG2	CCNB2	MAP2
CHRNA9	SOCS4	CDH18		SMTNL2			MOBP	RDX	RRM2
PRDM6	GSC	SCG5		CAMK2D			RP11-1144P22.1	GATA6-AS1	DCDC2
PHACTR1	PAPPA2	COL13A1		GCNT1			SOX4	FOXF1	PTHLH
SOX3	LECT1	VCL		NCALD			SLC39A2	PRRG4	CA8
PRSS22	CDCA8			SLFN5			PTTG1	SDC4	ZFP36L2
KRT23	TNC			SCN9A			DNAJC15	CCL2	TRIM55
GPM6B	CDH7			PRRX1			SDC4	FAM20A	ENO2
TAOK3	GYPC			S100Z			DOCK2	DSP	ANO4
MYLIP	VASH2			RAPGEF5			CD55	DPYSL3	BST2
RRM2	HOXB2			IQUB			AK4	PDCD2	UBE2C
JAG1	SPTSSB			CALCR			SPNS2	LAMA4	PHLDB2
FBN2	TMEM64			TPX2			GJA1	NECAB1	DOCK2
				GATA3			HAS2	FGFBP1	NOV
				PCDH10			WLS	GUCY1A3	IER3
				AP3B2			BAALC	LINC00960	PCDH19
				CDK1			BTG1	LEF1	CDKN1C
				KCNK10			PCDH9	NDRG2	LRRC17
				HOXA9			BST2	MVD	ID4
				CYP27A1			PKDCC	FGF13	CAV1
				SLITRK4			SUSD3	SOX9	NDRG2
				MRVI1			MCC	NPM3	PDGFA
				MAGI3			RP11-115D19.1	RP3-428L16.2	CALB1
				SYNPR			MBNL2	LIMA1	HAND2
				HMGCS1			RAB25	ARMCX3	PIM1
				DYNC1I1			GAP43	TMEM30A	RP11-359M6.1
				ARHGAP24			GAS1	RAB31	RPS4Y1
				EPB41L3			TPD52L1	LRRC32	CRYM
				CAPN6			CTD-2501M5.1	IGFBP4	T
				CSF3R			MSX2	MAD2L2	LRRC38
				PITX2			BMP2	GAD1	CST4
				ADAMTS6			SCPEP1	MMP2	SLC7A8
				UBE2C			EFNA1	CAMK2N1	BTG1
				SLC4A8			ANKS1A	GATA3-AS1	CTHRC1
				LRAT			EOMES	B4GALT1	PTPRN
				VSNL1			LY6E	GGH	CMAS
				PRLR			ID2	TPX2
				TMPRSS11F			PRPH	SVIP
				HOXA10			ARL6IP1	ZFP36L2
				LHX9			CEBPD	MUM1L1
				VMO1			NKX1-2	PDCD4
				TNK1			C1orf21	IRX3
				RGS3			BAMBI	BICD1
				ANXA4			PERP	DSEL
				MPZL1			ZIC2	PHACTR1
				LMOD1			VGF	DDIT4L
				SOX11			VCAN	MPP1
				FAM89A			PCDH19	MANBA
				IFITM3			SLC7A2	ITGB8
				PRC1			PCAT4	CLU
				LHFP			GATA6-AS1	UBASH3B
				ASPHD2			KCNG1	HOXB-AS1
				PPARG			HOXB5	FBN2
				COLEC12			NR0B1	LPAR4
				HIST1H4C			RP11-798K23.4	C1orf21
				TRIM38			PLK2	GZMK
				ZEB2			RP11-20D14.6	PAQR8
				SP6			STARD10	AURKB
				BNIP3			SEMA6A	AP1S1
							RASGEF1B	RP11-85G21.3
							PRDX4	VSNL1
							LINC00152	PHLDA3
							PRRG4	MESP2
							PRSS1	ACKR3
							ZNF503	ENPEP
							CNTNAP2	DLL3
							NKD1	NODAL
							PAPPA	TNFRSF11B
							RP11-771K4.1	SLC7A3
							SAMD11	CCDC34
							IRX5	ANG
							H1F0	NUSAP1
							CHN1	UPK2
							F3	FEZ2
							ARHGAP29	PRR15
							HEBP1	ANKS1A
							C11orf96	PCDH17
							LINC00479	PVRL2
							ADAMTS6	SOX15
							TTN	RRM2
							TNFSF15	ACTG2
							QPCT	CNTNAP2
							TCEA1	KCNK17
							PRAC1	LINC00936
							LOX	MYO10
							GPRC5A	C1orf56
							MKI67	CALB1
							LMNA	MT-ND6
							BCYRN1	KIAA1462
							S100A11	GSTA3
							TACC1	HESX1
							HIST1H2AC	CLSTN2
							GYPC	COL4A3BP
							SOX9	USP18
							CAPN6	EPB41L2
							DNAJC1	BAALC
							CST2	TUBB6
							LMO1	CRABP1
							FOSL1	MANEA
							HLA-DRB1	CLIC3
							EGR1	MTUS2
							GLRX	AMIGO2
							DDIT4L	PNP
							HLA-G	SORBS2
							PPP2R2B	SNAI1
							CD99	STMN2
							LBH	JARID2
							PCDH17	SPHK1
							BBC3	FGF17
							GNG11	PPP1R2
							CCDC3	MGST2
							HOXB8	ABHD12B
							KCTD12	SEMA3C
							IGDCC3	COL5A2
							EPB41L3	SPNS2
							FAM184A	SLC7A2
							RAB31	CA12
							LINC00545	AMOTL2
							RP11-85G21.3	ZNF503
							BHLHE41	FUT8
							ATOH8	C9orf3
							ZIC1	NTF3
							DSG3	SBF2-AS1
							TMEM100	ARHGAP24
							PRAC2	KIAA0040
							ATF3	TMOD1
							PSTPIP2	NMU
							CDX4	PDK4
							GLDN	CACNA2D2
							ARL4C	PPP2R2B
							SPRY1	RBM24
							DUSP6	LYSMD2
							PRTG	KIAA1551
							VAMP8	RP11-20D14.6
							RPS27L	JADE1
							ZEB2	NFKBIA
							TM4SF18	AMOT
							ALCAM	SALL1
							S1PR3	ZFHX3
							MDK	RASGRP3
							HES1	FXYD6
							GSTM3	HOXA11-AS
							GFRA1	SHD
							MEIS2	P2RY6
							CREG1	GOLIM4
							FAM24B	RP11-1144P22.1
							COL5A2	COLEC12
							DIAPH2	PCDH10
							NUSAP1	RP11-132A1.3
							SLC16A10	FGF9
							PIM1	RASL11B
							FAM89A	ARL4D
							FFAR4	CAPN2
							GLB1	ODAM
							CKS1B	VGLL1
							CDKN3	PKDCC
							AURKB	PRKCDBP
							ZFHX4	CHST2
							ITM2A	NFE2L3
							MLPH	CDH2
							ZAP70	DAAM1
							FEZ2	VRTN
							LMOD2	SLC29A1
							FGFR1	RP11-149I23.3
							PHOX2A	ALCAM
							RERG	GREM2
							UBASH3B	TCF4
							RPRM	ADAMTS1
							IQGAP2	FGFR1
							MLLT3	SLCO2A1
							CHCHD10	LITAF
							GSTA4	WNT4
							SLC25A18	WT1
							CBR3	DLGAP4
							NPC2	RGS4
							SLC7A8	NAP1L3
							RP11-267L5.1	SLC16A6
							DMRT1	APOBEC3G
							UPK2	CDH7
							DSEL	IQGAP2
							MYLIP	PVRL4
							C1orf56	MXRA5
							EFEMP1	PLK2
							HMMR	MOK
							PDHB	EFNA5
							GGH	SLC7A8
							CLSTN2	NRG2
							EPHB6	TSPAN5
							MAP1B	2020-09-08
							ITGA6	HTRA1
							ENTPD3	COL1A2
							PRKAR2B	AKAP12
							SLC16A6	TACSTD2
							ENO2	ARL4C
							CDH2	KCNMB1
							RPL22L1	CCND2
							TMSB10	SH3KBP1
							MEIS3	DLGAP5
							LURAP1L	S100A6
							TMOD1	FAM64A
							KDR	FAM83D
							IRX2	SP6
							NPNT	DIO2
							EIF4EBP1	COL9A3
							VIPR2	VCAN
							SPHK1	KCNMA1
							MMP23B	NOG
							TRPA1	FZD7
							UTS2	AFAP1L2
							MPZL1	GLRX
							GPRC5C	LMO4
							PNP	KDR
							PPFIBP2	IDO1
							EIF5A	SPIN4
							TFAP2B	C1orf115
							ATP6V0D2	OSBPL9
							ODC1	NAV2
							RBP1	GFRA1
							PGM1	EPHB1
							RDX	CAPN6
							UACA	SPTSSB
							CCNB2	HTR1E
							PLXNA2	PRLR
							CCDC34	RND3
							DAB2	NQO2
							WNT4	EMP3
							LRRN3	ARL4A
							GATA3-AS1	BCAT1
							NPY1R	APOC1
							FGF13	SLC8A1
							SCT	SH2D4A
							COLEC12	GRAP2
							FAM20A	CD47
							SCG5	SERTAD4
							DPP10-AS1	TRH
							COL5A1	NETO2
							ENG	C1orf61
							CLDN3	BOC
							EPB41L2	PKP2
							HIST1H1D	CCPG1
							LGR5	ITGA5
							GTSE1	SLITRK4
							YPEL2	B4GALT6
							MPP1	UNC5B
							SORBS2	KALRN
							EGR2	SPATS2L
							MXRA8	RAB11FIP1
							RP11-89N17.4	CDCA3
							ADAMTS1	CREG1
							SLC12A2	HEY2
							RP11-788H18.1	SYT1
							SH3KBP1	SOX3
							LRRC32	STARD10
							FBXO2	MCHR1
							LOXL1	SOCS4
							KIF5B	TBX6
							RPP25	CHI3L2
							SSTR2	ZNF703
							CAV2	KIFAP3
							ODAM	GPR157
							PDK4	SLC39A2
							UGP2	GRHL2
							GRHL2	FAM46B
							LRRTM1	RHOU
							PDGFRA	COL23A1
							CAPN2	PTCH1
							ACAT2	TPD52L1
							HES2	KANK1
							VWA5A	YPEL2
							LIMCH1	OTX2
							TPX2	GRHL1
							CTA-29F11.1	ZMAT4
							NRK	PIF1
							PTHLH	LOXL1
							SBSPON	CTB-158E9.1
							SOCS2	ITGA6
							TMEM52B	FAM43A
							KLF5	CDC42EP3
							PTPRS	TACC1
							SOCS3	KCTD12
							PAQR8	CD200
							RHOU	BTG2
							ZEB1	LMOD2
							RP11-132A1.3	COL4A1
							RRM2	TFPI
							FXYD3	HLA-DRA
							ITGA2	NPNT
							ID4	NES
							SPATS2L	ANGPT2
							GAD1	COL5A1
							AKAP12	LRAT
							SRY	GPRC5A
							FAM46B	PLXNA2
							HOXB9	PSTPIP2
							SH3BP5	DAB2
							ASNS	CA8
							LIMA1	DMD
							CRABP1	CTSK
							LHX2	HOXB7
							CDCA3	LYPD6B
							CLEC4D	ZEB2
							DMD	NPY1R
							LHFP	ITM2A
							GREM2	PRAC2
							COL4A3BP	DEPDC1
							ELF3	IL6ST
							MAP2	NRK
							CRNDE	MKI67
							PKP2	UACA
							SERINC5	SGK2
							LGI1	MEIS1
							TUBB6	NUF2
							HTRA1	SMARCA2
							SHD	PDGFRA
							GABRB2	LGR5
							DUT	ANGPT1
							ADAMTS9	PRAC1
							H2AFJ	VASH2
							TNNT1	KANK4
							LRP2	VIPR2
							TNC	ABLIM1
							COL9A3	FOLR1
							PMEL	SLC4A8
							UMODL1	CNKSR3
							NPM1	WASL
							MRS2	C3orf58
							MYL12B	HOXB4
							BMPER	AASS
							RASGRP1	RCSD1
							MYO10	MT1F
							ZNF703	CTD-2545M3.8
							NETO2	HMMR
							GRHL1	COL2A1
							TMSB15A	C9orf135
							PSRC1	SUCO
							TMEM123	RP11-69I8.2
							TPST2	ELF3
							WNT5A	PSRC1
							ASPM	RASGEF1B
							CCND2	QDPR
							NCL	PLSCR1
							NPR3	RP11-357H14.17
							ABCA1	TP63
							AKR1D1	LDB2
							KHDRBS3	FGF10
							SLC16A3	TGFBI
							FAM83D	CYP27A1
							B2M	SEMA6D
							LRAT	PPIC
							PLEKHF1	MYOCD
							SPSB2	PRKAR2B
							ERP27	PAG1
							DYNLT3	LIFR
							LIFR	LCK
							SNAI1	FAM162A
							VRTN	LINC00545
							HMGCS1	LNX1
							SEMA3E	RP11-793H13.10
							TACR1	ADAMTS18
							NDC80	PTAR1
							HOXB4	LMO1
							PCDH7	RP11-318C24.2
							TYROBP	TRDN
							ZFHX3	MITF
							KNSTRN	ISM1
							UNC5B	FAM102B
							TSC22D1	NRCAM
							RP11-357H14.17	BMPER
							HEY2	PTCHD1
							DEPDC1	NLGN4X
							NEBL	PTPRZ1
							FAM64A	RASGRP1
							COL6A3	DYNC1I1
							CCND3	ERP27
							PHKG1	KIAA1217
							ALPK2	DLX6
							AC002454.1	TNFRSF19
							DSP	TSC22D3
							IRX1	EPSTI1
							AMER2	RP11-771K4.1
							CCPG1	NSG1
							CADM1	SLC16A3
							NUCB2	NEDD9
							HOXA7	NMRK2
							ERMN	MAGI3
							NDRG2	ADAMTS9
							TMEM64	ALX1
							SGOL2	TTYH1
							ARID5B	SHISA6
							AMOT	GCNT1
							ITGA5	PCDH7
							KCNQ1OT1	TNNI3
							SOWAHA	SCT
							FOXF1	AFP
							PVRL4	CTA-29F11.1
							CA8	EBF2
							C6orf141	DLC1
							EPS8L2	HDAC9
							SLC8A1	RPP25
							HOXA9	ENTPD4
							DLGAP5	TRPM7
							FDX1	TFAP2B
							TWIST1	NUDT8
							TRABD2B	FAM65B
							CYP27A1	BCL2L11
							NTF3	SKAP2
							AP1S1	CGN
							SSBP3	ALPK2
							H2AFY2	EN1
							NES	TUBA4A
							EPHB1	STC1
							NTM	PIM1
							HN1	GABRB3
							KRT80	RBFOX1
							TPD52	CAV1
							SLC7A11	MLLT3
							PALLD	TNFRSF11A
							CHST2	KCNG1
							NSG1	SCUBE3
							SC5D	RGS3
							RP11-445F12.1	DLG2
							EPHB3	LPAR6
							MSMO1	POU3F1
							ARL4A	RP11-298D21.1
							MOK	TBC1D9
							DMRTA2	FHL1
							NUF2	MAF
							VSNL1	CAMKK2
							MANBA	GAP43
							FUT8	GFPT2
							LAYN	ATP2B4
							FMOD	ARID5B
							TBX2	MMP23B
							DAAM1	KLF5
							IER2	HES4
							GNA14	PCDH19
							NMRK2	ACADL
							PHACTR2	VGF
							NASP	PLAC9
							HHIP	PRC1
							IGFBP4	MXI1
							FOXC1	KCNJ13
							LEF1	AMER2
							SEMA5A	ZAP70
							PRSS35	EFNB2
							ATP8A1	RIMKLA
							CLVS2	EPHA7
							ITGAV	TNC
							PDGFA	ROR2
							PRC1	HOXB3
							SLITRK6	ERVH48-1
							LECT1	FAM13A
							NAP1L3	KIF23
							IFITM3	FRZB
							ARSE	KCNJ12
							AMIGO2	ATP8A1
							MMP2	TMEM150C
							BICD1	RABGAP1L
							CD200	PRSS35
							MTUS2	PPFIBP2
							GCNT1	CUZD1
							CEP55	WWTR1
							PPP1R2	NUAK1
							CDA	FREM2
							LMO4	CDON
							SCUBE3	BBC3
							RASL11B	JAKMIP1
							TBX3	NTM
							KANK4	FAM49A
							RP11-69I8.2	ARHGAP28
							ENPEP	CRNDE
							TSPAN5	TCERG1L
							METTL7A	FOSL1
							ZFP36L2	RP11-806H10.4
							RAB11FIP1	KIF1A
							MDFI	LIMCH1
							DENND2C	TRIM38
							PAG1	PLA2G4C
							FGF9	EPS8L2
							PTCH1	TMTC1
							PBK	CTD-2314G24.2
							HJURP	GPRC5C
							CDCA8	KCNQ1OT1
							DACT1	NPFF
							GFPT2	GPC3
							KIF23	DENND2C
							CDCA7L	TCEAL7
							PVRL2	PSORS1C2
							LMO2	CDK6
							PPIC	PPP1R3B
							HAND2-AS1	TTC39B
							MXRA5	NDC80
							SCG3	JADE3
							IFI16	COL25A1
							JAG1	NOX4
							EPHA4	SCG5
							PSIP1	FBXO2
							GPR157	DTL
							SEMA6D	ZIC3
							SOX6	S1PR3
							ECM1	HJURP
							NECAB1	CGNL1
							CDC42SE1	FRMD6
							MMP9	THRB
							FBXO32	KCNN4
							USP44	CLDN3
							CSF3R	ASPM
							MIAT	ATOH8
							NEB	ADAMTS6
							PCSK9	ZNF467
							HESX1	TANC2
							RP11-277P12.10	DEPTOR
							PAX2	IRX2
							MAB21L2	KIAA1456
							GOLM1	BNIP3
							EDA	FAM162B
							REXO2	CDH10
							SMOC1	CHN2
							HOXB-AS1	KDM7A
							LGI2	SLC40A1
							VASH2	CRYBA4
							IDH1	FAM184A
							ADAMTS5	GNAI1
							RP11-149I23.3	CEP85L
							HOXB7	TCEAL2
							HOXA1	SACS
							PDLIM7	RNF152
							PLP1	UNC5C
							FAM122C	NRP1
							MUCL1	SMAD9
							PDLIM2	MARK1
							RBFOX1	FEZF1
							FGFBP3	SNAPC1
							DYNC1I1	ARL15
							ERVH48-1	LINC00152
							KCNN4	KLF7
							TNFRSF11B	WIPF1
							MT-ND4	SLC7A11
							AMOTL2	PHLDA2
							CLIC5	SPG20
							SLC20A2	SPRY1
							APOL3	SEMA5A
							GREM1	MTSS1
							TNFRSF19	SULF1
							VCAM1	MBNL3
							NRG2	BUB1
							HVCN1	KIAA0226L
							B3GNT2	ARHGAP18
							COCH	FOSL2
							PTGS2	KIT
							ATP2B4	ITGAV
							MESDC2	SLC20A2
							RCSD1	MARVELD3
							GDF6	CCDC112
							HSPD1	HOXC13-AS
							KCNV1	PRICKLE2
							CEBPZ	FIGN
							ASCL1	ABCA7
							PPP1R14C	RACGAP1
							RORB	NCALD
							CYFIP2	ZIC5
							TNS4	PPP1R17
							ZNF804A	KLKB1
							PLSCR1	KIF21A
							SYT1	CADM1
							DCDC2	JAG1
							MYOCD	KIFC1
							URAD	DUSP4
								DTX4
								MIAT
								COCH
								KCNH5
								ETV1
								GDF6
								WDHD1
								ELAVL2
								NEXN
								TM4SF18
								RNF43
								ZNF165
								SERINC5
								GDF3
								CLIC5
								EPHB3
								SYT7
								OLFM1
								ABCA1
								SFN
								DPF3
								AKR1C3
								RPS6KA5
								TSHZ3
								CKAP2L
								MDFIC
								LPIN1
								PBK
								CCNE2
								SULF2
								ENDOD1
								SERHL2
								SHROOM3
								C5orf38
								PRSS22
								EXPH5
								BEX5
								PDGFA
								SLFN5
								FAM111B
								TMC5
								BEND4
								ADAMTSL4
								BACH2
								CCNI2
								PHLDB2
								TFPI2
								ARHGAP10
								KIF14
								NKAIN4
								LSAMP
								LINC01021
								MME
								GDPD2
								MCC
								RP11-663N22.1
								CXorf57
								TMEM132B
								RUNX1
								FAM126A
								DYNLT3
								PIK3R1
								GPRIN3
								PRDM6
								CACHD1
								ARHGAP11A
								CDA
								G2E3
								LRRC23
								KCNK1
								PRRT4
								EPHA4
								CTTNBP2
								RAB38
