# Supplementary material for: High-resolution transcriptional and morphogenetic profiling of cells from micropatterned human ESC gastruloid cultures
Source: eLife journal article supplement (doi:10.7554/elife.59445), 2020-11-18
Supplement: supp [file elife-59445-supp-v1.zip › elife_poa_e59445_Source_data_4.xlsx]

## Sheet: Mouse.Pred.Monkey
Predicted mouse (Pijuan-sala et al.) cell types and stages in cynomolgous monkey (Ma et al.)								Shared highly variable genes (HVG) between mouse and monkey dataset, and average gene expression correlation on the basis of shared HVG												P-values of gastruloid cell type correspondances to mouse cell types calculated by permutation tests
Monkey Cell ID	Monkey cell type	Monkey developmental stage	Predicted mouse cell type	Predicted mouse developmental stage				Top 500 shared HVG between monkey (Pijuan-sala et al.) and cynomolgous monkey (Ma et al.)		Correlation between mouse and monkey stages												Mouse
MFI111_sc01	TE and derivatives	11 dpf	ExE ectoderm	E7.5				APOA1			Cynomolgus monkey											ExE ectoderm	Epiblast	Mesenchyme	ExE endoderm	Primitive Streak	Haematoendothelial progenitors	Visceral endoderm	Mixed mesoderm	Nascent mesoderm	PGC	Surface ectoderm	Caudal epiblast	Rostral neurectoderm	ExE mesoderm	Parietal endoderm	Def. endoderm	Gut
MFI111_sc02	postE-EPI	11 dpf	Epiblast	E7				TTR			11 dpf	12 dpf	13 dpf	14 dpf	15 dpf	17 dpf				Cynomolgus monkey	TE and derivatives	0.000999001	1	1	1	1	1	1	1	1	1	1	1	1	1	0.998002	1	1
MFI111_sc03	EXMC	11 dpf	Mesenchyme	E7.25				SPINK1	Mouse	E6.5	0.401187	0.400408	0.358122	0.353131	0.3622	0.316595					postE-EPI	1	0.000999001	1	1	0.274725	1	1	1	1	1	1	1	1	1	1	1	1
MFI111_sc04	TE and derivatives	11 dpf	ExE ectoderm	E6.5				MYL7		E6.75	0.361556	0.34841	0.309133	0.302113	0.347544	0.285256					EXMC	1	1	0.000999001	1	1	0.000999001	1	0.000999001	0.014985	0.951049	1	1	1	0.35964	0.000999001	0.505495	1
MFI111_sc05	VE/YE	11 dpf	ExE endoderm	E6.75				CER1		E7.0	0.375363	0.364589	0.333616	0.320395	0.376029	0.320817					VE/YE	1	1	1	0.000999001	0.987013	1	0.000999001	1	0.687313	0.681319	1	1	1	1	1	0.00699301	1
MFI111_sc06	postE-EPI	11 dpf	Primitive Streak	E7				GPX3		E7.25	0.356306	0.345787	0.317434	0.299217	0.362928	0.311721					E-Gast	1	0.108891	1	1	0.000999001	1	1	1	0.562438	1	1	0.002997	0.04995	1	1	1	1
MFI111_sc07	EXMC	11 dpf	Haematoendothelial progenitors	E7.25				PLAC8		E7.5	0.34896	0.331596	0.306551	0.30128	0.356135	0.324746					E-AM	0.999001	0.875125	1	0.857143	0.000999001	1	1	1	0.856144	0.000999001	0.000999001	0.0629371	1	1	1	1	1
MFI111_sc08	VE/YE	11 dpf	Visceral endoderm	E6.75				DKK1													L-Gast1	1	0.261738	1	1	0.000999001	1	1	1	1	1	1	1	1	1	1	1	1
MFI111_sc09	EXMC	11 dpf	Mixed mesoderm	E7				DAB2													L-Gast2	1	0.998002	1	1	0.0769231	0.982018	1	0.000999001	0.000999001	0.20979	1	1	1	0.001998	1	1	1
MFI111_sc10	VE/YE	11 dpf	Visceral endoderm	E7				FGB													L-AM2	1	1	0.848152	0.000999001	1	0.933067	1	0.146853	0.786214	0.000999001	1	1	1	0.011988	1	1	1
MFI111_sc11	TE and derivatives	11 dpf	ExE ectoderm	E7.5				FABP1													postL-EPI	1	0.000999001	1	1	0.465534	1	1	1	0.942058	1	1	1	0.196803	1	1	1	0.0829171
MFI111_sc12	TE and derivatives	11 dpf	ExE ectoderm	E6.5				PHLDA2													L-AM1	1	0.00799201	1	1	0.004995	1	1	1	0.022977	0.0949051	1	1	1	1	1	1	1
MFI111_sc13	VE/YE	11 dpf	ExE endoderm	E7.25				ESAM													E-PGC	1	0.573427	1	1	0.00899101	1	1	1	0.000999001	0.0629371	1	1	1	1	1	1	1
MFI111_sc14	TE and derivatives	11 dpf	ExE ectoderm	E7.5				NPPB
MFI111_sc15	VE/YE	11 dpf	ExE endoderm	E7				APOB
MFI111_sc16	VE/YE	11 dpf	ExE endoderm	E7.25				DLK1
MFI111_sc17	E-Gast	11 dpf	Nascent mesoderm	E7.25				PDZK1
MFI111_sc18	TE and derivatives	11 dpf	ExE ectoderm	E7				CEBPB
MFI111_sc19	EXMC	11 dpf	Mesenchyme	E7.5				GADD45G
MFI111_sc20	postE-EPI	11 dpf	Epiblast	E7				ANXA1
MFI111_sc21	postE-EPI	11 dpf	Epiblast	E7				FOXQ1
MFI111_sc22	TE and derivatives	11 dpf	ExE ectoderm	E7				SLC7A3
MFI111_sc23	TE and derivatives	11 dpf	ExE ectoderm	E7.5				WFDC2
MFI111_sc24	TE and derivatives	11 dpf	ExE ectoderm	E6.5				S100A6
MFI111_sc25	TE and derivatives	11 dpf	ExE ectoderm	E6.5				APOC3
MFI111_sc26	TE and derivatives	11 dpf	ExE ectoderm	E7.25				LGALS3
MFI111_sc27	EXMC	11 dpf	Mesenchyme	E7.5				NOG
MFI111_sc28	TE and derivatives	11 dpf	ExE ectoderm	E7.25				CDH5
MFI111_sc30	postE-EPI	11 dpf	Epiblast	E7				SLC40A1
MFI111_sc31	TE and derivatives	11 dpf	ExE ectoderm	E7.5				ID2
MFI111_sc32	TE and derivatives	11 dpf	ExE ectoderm	E7.5				CDKN1C
MFI111_sc33	VE/YE	11 dpf	ExE endoderm	E7.25				AFP
MFI111_sc35	TE and derivatives	11 dpf	ExE ectoderm	E7.5				HSD17B2
MFI111_sc37	TE and derivatives	11 dpf	ExE ectoderm	E7.5				SAT1
MFI111_sc39	TE and derivatives	11 dpf	ExE ectoderm	E6.5				HAND1
MFI111_sc40	TE and derivatives	11 dpf	ExE ectoderm	E7.5				F10
MFI111_sc41	TE and derivatives	11 dpf	ExE ectoderm	E7				ADM
MFI111_sc42	TE and derivatives	11 dpf	ExE ectoderm	E7.25				CRABP1
MFI111_sc43	TE and derivatives	11 dpf	ExE ectoderm	E7.5				PENK
MFI111_sc44	E-AM	11 dpf	PGC	E7.25				GPC3
MFI111_sc45	TE and derivatives	11 dpf	ExE ectoderm	E6.5				HTRA1
MFI111_sc46	TE and derivatives	11 dpf	ExE ectoderm	E6.5				S100A16
MFI111_sc47	EXMC	11 dpf	Mixed mesoderm	E7				MGARP
MFI111_sc48	EXMC	11 dpf	Mixed mesoderm	E7.5				KRT18
MFI111_sc50	VE/YE	11 dpf	ExE endoderm	E7				MORC4
MFI111_sc51	TE and derivatives	11 dpf	ExE ectoderm	E7.5				CDKN1A
MFI111_sc52	EXMC	11 dpf	Mixed mesoderm	E7				APOA2
MFI111_sc53	postE-EPI	11 dpf	Epiblast	E7				ANKRD1
MFI111_sc54	TE and derivatives	11 dpf	ExE ectoderm	E7.25				SFRP1
MFI111_sc55	TE and derivatives	11 dpf	ExE ectoderm	E7.5				CPM
MFI111_sc56	EXMC	11 dpf	Mesenchyme	E7.25				ARHGDIB
MFI111_sc58	postE-EPI	11 dpf	Epiblast	E7				APLNR
MFI111_sc59	TE and derivatives	11 dpf	ExE ectoderm	E7.5				DPPA5
MFI111_sc60	EXMC	11 dpf	Mixed mesoderm	E7				PLAC1
MFI111_sc61	TE and derivatives	11 dpf	ExE ectoderm	E6.5				CRYAB
MFI111_sc62	TE and derivatives	11 dpf	ExE ectoderm	E7.5				PRG2
MFI111_sc63	EXMC	11 dpf	Mixed mesoderm	E7.25				GDF3
MFI111_sc64	EXMC	11 dpf	Nascent mesoderm	E7.25				FZD5
MFI111_sc65	VE/YE	11 dpf	Visceral endoderm	E7				IHH
MFI111_sc66	postE-EPI	11 dpf	Epiblast	E7				FOS
MFI111_sc67	TE and derivatives	11 dpf	ExE ectoderm	E7.5				KRT23
MFI111_sc68	EXMC	11 dpf	Mixed mesoderm	E7				TBX3
MFI111_sc69	TE and derivatives	11 dpf	ExE ectoderm	E7.5				IGFBP3
MFI111_sc70	postE-EPI	11 dpf	Epiblast	E7				FGG
MFI111_sc71	TE and derivatives	11 dpf	ExE ectoderm	E6.5				TNNC1
MFI111_sc73	TE and derivatives	11 dpf	ExE ectoderm	E7.5				TINAGL1
MFI111_sc74	TE and derivatives	11 dpf	ExE ectoderm	E7.5				SAMSN1
MFI111_sc76	EXMC	11 dpf	Haematoendothelial progenitors	E7.5				ACTC1
MFI111_sc77	TE and derivatives	11 dpf	ExE ectoderm	E6.5				CUBN
MFI111_sc78	TE and derivatives	11 dpf	ExE ectoderm	E7.5				EPAS1
MFI111_sc79	TE and derivatives	11 dpf	ExE ectoderm	E7				FST
MFI111_sc80	TE and derivatives	11 dpf	ExE ectoderm	E6.5				TMEM88
MFI111_sc81	TE and derivatives	11 dpf	ExE ectoderm	E7.5				RBP4
MFI111_sc82	VE/YE	11 dpf	ExE endoderm	E7				PECAM1
MFI111_sc83	TE and derivatives	11 dpf	ExE ectoderm	E7.25				SGK1
MFI111_sc84	TE and derivatives	11 dpf	ExE ectoderm	E7				IGFBP2
MFI111_sc86	VE/YE	11 dpf	ExE endoderm	E6.75				OTX2
MFI111_sc87	TE and derivatives	11 dpf	ExE ectoderm	E7.25				LGALS2
MFI111_sc88	EXMC	11 dpf	Nascent mesoderm	E7				ITM2B
MFI111_sc89	EXMC	11 dpf	Mixed mesoderm	E7.25				SHISA2
MFI111_sc90	postE-EPI	11 dpf	Epiblast	E7				GSTO1
MFI111_sc91	TE and derivatives	11 dpf	ExE ectoderm	E7.5				LRP2
MFI111_sc92	TE and derivatives	11 dpf	ExE ectoderm	E7				ACTA2
MFI111_sc93	VE/YE	11 dpf	ExE endoderm	E7.5				F2
MFI111_sc94	TE and derivatives	11 dpf	ExE ectoderm	E7.5				ELAVL3
MFI111_sc96	VE/YE	11 dpf	Visceral endoderm	E7				SPP1
MFI112_sc01	TE and derivatives	11 dpf	ExE ectoderm	E7.5				DPP4
MFI112_sc04	TE and derivatives	11 dpf	ExE ectoderm	E7.5				LITAF
MFI112_sc05	E-Gast	11 dpf	Primitive Streak	E7.25				TMEM181
MFI112_sc06	TE and derivatives	11 dpf	ExE ectoderm	E7.5				COL4A1
MFI112_sc07	TE and derivatives	11 dpf	ExE ectoderm	E7.5				SLC2A2
MFI112_sc08	TE and derivatives	11 dpf	ExE ectoderm	E7.25				GREM2
MFI112_sc10	postE-EPI	11 dpf	Epiblast	E7				IRF7
MFI112_sc11	EXMC	11 dpf	Haematoendothelial progenitors	E7.5				HAPLN1
MFI112_sc12	TE and derivatives	11 dpf	ExE ectoderm	E7				ID3
MFI112_sc13	TE and derivatives	11 dpf	ExE ectoderm	E7.5				PRTG
MFI112_sc15	TE and derivatives	11 dpf	ExE ectoderm	E7.5				ISL1
MFI112_sc17	TE and derivatives	11 dpf	ExE ectoderm	E7.5				PMP22
MFI112_sc18	EXMC	11 dpf	Mixed mesoderm	E7				FLRT3
MFI112_sc19	TE and derivatives	11 dpf	ExE ectoderm	E7.5				ECM1
MFI112_sc21	TE and derivatives	11 dpf	ExE ectoderm	E7.5				TDO2
MFI112_sc24	TE and derivatives	11 dpf	ExE ectoderm	E7.5				SOAT2
MFI112_sc25	TE and derivatives	11 dpf	ExE ectoderm	E7.5				KRT7
MFI112_sc26	EXMC	11 dpf	Mesenchyme	E7.25				LHX1
MFI112_sc27	EXMC	11 dpf	Mesenchyme	E7.5				VAMP8
MFI112_sc28	TE and derivatives	11 dpf	ExE ectoderm	E7.25				BMP4
MFI112_sc29	TE and derivatives	11 dpf	ExE ectoderm	E7.25				BMPER
MFI112_sc30	TE and derivatives	11 dpf	ExE ectoderm	E6.5				CTSC
MFI112_sc31	TE and derivatives	11 dpf	ExE ectoderm	E7.5				FOLR1
MFI112_sc32	TE and derivatives	11 dpf	ExE ectoderm	E7				CTHRC1
MFI112_sc33	postE-EPI	11 dpf	Epiblast	E7				CCL20
MFI112_sc34	TE and derivatives	11 dpf	ExE ectoderm	E6.5				PARM1
MFI112_sc35	VE/YE	11 dpf	ExE endoderm	E7				DPPA3
MFI112_sc36	TE and derivatives	11 dpf	ExE ectoderm	E7.25				HBEGF
MFI112_sc38	TE and derivatives	11 dpf	ExE ectoderm	E6.5				MESP1
MFI112_sc39	TE and derivatives	11 dpf	ExE ectoderm	E7.5				DUSP1
MFI112_sc42	TE and derivatives	11 dpf	ExE ectoderm	E7.5				LGR5
MFI112_sc44	TE and derivatives	11 dpf	ExE ectoderm	E7.5				RBM24
MFI112_sc46	TE and derivatives	11 dpf	ExE ectoderm	E7.5				SRI
MFI112_sc47	postE-EPI	11 dpf	Epiblast	E7				SKAP1
MFI112_sc48	TE and derivatives	11 dpf	ExE ectoderm	E7.5				NTS
MFI112_sc49	TE and derivatives	11 dpf	ExE ectoderm	E7.5				PLK2
MFI112_sc50	TE and derivatives	11 dpf	ExE ectoderm	E7.5				FN1
MFI112_sc51	postE-EPI	11 dpf	Epiblast	E7				RARRES1
MFI112_sc52	TE and derivatives	11 dpf	ExE ectoderm	E7.5				VIM
MFI112_sc53	TE and derivatives	11 dpf	ExE ectoderm	E6.5				EOMES
MFI112_sc55	TE and derivatives	11 dpf	ExE ectoderm	E7.25				BMP2
MFI112_sc56	TE and derivatives	11 dpf	ExE ectoderm	E7.5				ITM2A
MFI112_sc58	TE and derivatives	11 dpf	ExE ectoderm	E7.5				MTTP
MFI112_sc59	TE and derivatives	11 dpf	ExE ectoderm	E6.5				GSC
MFI112_sc60	E-AM	11 dpf	Surface ectoderm	E7.25				GATA3
MFI112_sc61	EXMC	11 dpf	ExE endoderm	E7.25				FGF17
MFI112_sc62	TE and derivatives	11 dpf	ExE ectoderm	E6.5				RBM20
MFI112_sc63	TE and derivatives	11 dpf	ExE ectoderm	E7				TFF3
MFI112_sc64	TE and derivatives	11 dpf	ExE ectoderm	E7.25				MSX2
MFI112_sc66	TE and derivatives	11 dpf	ExE ectoderm	E7.25				SOX2
MFI112_sc67	TE and derivatives	11 dpf	ExE ectoderm	E6.5				DUSP5
MFI112_sc68	VE/YE	11 dpf	ExE endoderm	E7.5				SLC43A2
MFI112_sc74	TE and derivatives	11 dpf	ExE ectoderm	E7.5				VGLL1
MFI112_sc75	TE and derivatives	11 dpf	ExE ectoderm	E7.5				FABP3
MFI112_sc77	postE-EPI	11 dpf	Epiblast	E7				DNMT3B
MFI112_sc78	TE and derivatives	11 dpf	ExE ectoderm	E7.25				CDH2
MFI112_sc80	TE and derivatives	11 dpf	ExE ectoderm	E7.5				IGF1
MFI112_sc81	TE and derivatives	11 dpf	ExE ectoderm	E7.5				HESX1
MFI112_sc83	TE and derivatives	11 dpf	ExE ectoderm	E7.5				ID1
MFI112_sc84	postE-EPI	11 dpf	Epiblast	E7				ELF1
MFI112_sc85	postE-EPI	11 dpf	Epiblast	E7				CRIP2
MFI112_sc86	VE/YE	11 dpf	ExE endoderm	E7				PMAIP1
MFI112_sc88	EXMC	11 dpf	Mixed mesoderm	E7.25				CDX2
MFI112_sc90	EXMC	11 dpf	Mesenchyme	E7.25				AVPI1
MFI112_sc91	postE-EPI	11 dpf	Primitive Streak	E6.5				TAGLN
MFI112_sc92	VE/YE	11 dpf	Visceral endoderm	E7				MATN1
MFI112_sc95	VE/YE	11 dpf	ExE endoderm	E7.25				KRT8
MFI112_sc96	postE-EPI	11 dpf	Epiblast	E7				WNT2
MFI121_sc01	VE/YE	12 dpf	Visceral endoderm	E7				PITX1
MFI121_sc02	TE and derivatives	12 dpf	ExE ectoderm	E7.25				WFDC1
MFI121_sc03	postE-EPI	12 dpf	Epiblast	E7				RSPO3
MFI121_sc04	TE and derivatives	12 dpf	ExE ectoderm	E7.5				CITED2
MFI121_sc05	TE and derivatives	12 dpf	ExE ectoderm	E7.5				F3
MFI121_sc06	postE-EPI	12 dpf	Epiblast	E7				ST3GAL5
MFI121_sc07	postE-EPI	12 dpf	Epiblast	E6.75				COL4A2
MFI121_sc09	TE and derivatives	12 dpf	ExE ectoderm	E7				BHLHE40
MFI121_sc11	EXMC	12 dpf	Mixed mesoderm	E7				CCDC146
MFI121_sc12	E-AM	12 dpf	ExE endoderm	E7.25				NID1
MFI121_sc14	TE and derivatives	12 dpf	ExE ectoderm	E6.5				MEST
MFI121_sc15	EXMC	12 dpf	Haematoendothelial progenitors	E7				TFEC
MFI121_sc16	TE and derivatives	12 dpf	ExE ectoderm	E7				HERPUD1
MFI121_sc17	TE and derivatives	12 dpf	ExE ectoderm	E7				EFNA1
MFI121_sc18	EXMC	12 dpf	ExE ectoderm	E7.25				BASP1
MFI121_sc19	E-AM	12 dpf	PGC	E7.25				ALAS2
MFI121_sc20	postE-EPI	12 dpf	Epiblast	E7				NPY
MFI121_sc21	E-AM	12 dpf	PGC	E7.25				FAM43A
MFI121_sc22	TE and derivatives	12 dpf	ExE ectoderm	E7.5				ARID3C
MFI121_sc24	E-AM	12 dpf	PGC	E7.25				MMP12
MFI121_sc25	EXMC	12 dpf	Haematoendothelial progenitors	E7.25				CST3
MFI121_sc26	postE-EPI	12 dpf	Epiblast	E7				DDAH1
MFI121_sc27	E-Gast	12 dpf	ExE ectoderm	E7				PDLIM4
MFI121_sc28	EXMC	12 dpf	Haematoendothelial progenitors	E7				LGALS1
MFI121_sc29	EXMC	12 dpf	Haematoendothelial progenitors	E7.5				PLAUR
MFI121_sc30	TE and derivatives	12 dpf	ExE ectoderm	E7				UNC5C
MFI121_sc32	TE and derivatives	12 dpf	ExE ectoderm	E7.5				PODXL
MFI121_sc33	TE and derivatives	12 dpf	ExE ectoderm	E6.5				F5
MFI121_sc34	E-Gast	12 dpf	Epiblast	E7				CCND2
MFI121_sc35	TE and derivatives	12 dpf	ExE ectoderm	E7.25				IER3
MFI121_sc36	E-AM	12 dpf	PGC	E7.25				TFPI2
MFI121_sc37	TE and derivatives	12 dpf	ExE ectoderm	E6.5				COTL1
MFI121_sc38	EXMC	12 dpf	Haematoendothelial progenitors	E7.25				SLPI
MFI121_sc39	TE and derivatives	12 dpf	ExE ectoderm	E7.25				COL1A1
MFI121_sc40	EXMC	12 dpf	Mesenchyme	E7.5				HOMER2
MFI121_sc41	TE and derivatives	12 dpf	ExE ectoderm	E7				PCP4
MFI121_sc42	EXMC	12 dpf	Haematoendothelial progenitors	E7				FOXA1
MFI121_sc43	postE-EPI	12 dpf	Epiblast	E7				GADD45B
MFI121_sc45	TE and derivatives	12 dpf	ExE ectoderm	E7.5				TNNI1
MFI121_sc46	TE and derivatives	12 dpf	ExE ectoderm	E7.5				DLC1
MFI121_sc47	TE and derivatives	12 dpf	ExE ectoderm	E7.5				MBNL2
MFI121_sc49	EXMC	12 dpf	Mesenchyme	E7.5				FHL2
MFI121_sc50	postE-EPI	12 dpf	Epiblast	E7				EZR
MFI121_sc51	postE-EPI	12 dpf	Epiblast	E7.25				WNT3A
MFI121_sc52	TE and derivatives	12 dpf	ExE ectoderm	E7.5				TFAP2C
MFI121_sc53	TE and derivatives	12 dpf	ExE ectoderm	E7.5				CAPG
MFI121_sc54	TE and derivatives	12 dpf	ExE ectoderm	E7.5				JUNB
MFI121_sc55	TE and derivatives	12 dpf	ExE ectoderm	E7				RGCC
MFI121_sc56	EXMC	12 dpf	Mesenchyme	E7.25				MTUS1
MFI121_sc57	TE and derivatives	12 dpf	ExE ectoderm	E7.5				PLAT
MFI121_sc58	TE and derivatives	12 dpf	ExE ectoderm	E7.5				GRHL3
MFI121_sc59	EXMC	12 dpf	Mixed mesoderm	E7				PLAGL1
MFI121_sc62	TE and derivatives	12 dpf	ExE ectoderm	E7.5				PCDH7
MFI121_sc63	EXMC	12 dpf	Haematoendothelial progenitors	E7.5				RABGAP1L
MFI121_sc65	TE and derivatives	12 dpf	ExE ectoderm	E7				FLT1
MFI121_sc66	postE-EPI	12 dpf	Epiblast	E7				OTC
MFI121_sc67	TE and derivatives	12 dpf	ExE ectoderm	E7.25				ETS2
MFI121_sc68	E-Gast	12 dpf	Epiblast	E7				TFAP2A
MFI121_sc69	TE and derivatives	12 dpf	ExE ectoderm	E7.5				SOX9
MFI121_sc70	EXMC	12 dpf	Haematoendothelial progenitors	E7.25				FOSB
MFI121_sc71	TE and derivatives	12 dpf	ExE ectoderm	E7.25				TDRD5
MFI121_sc72	postE-EPI	12 dpf	Epiblast	E7				PCSK6
MFI121_sc73	TE and derivatives	12 dpf	ExE ectoderm	E6.5				PDLIM3
MFI121_sc74	TE and derivatives	12 dpf	ExE ectoderm	E7.5				ADRB3
MFI121_sc75	TE and derivatives	12 dpf	ExE ectoderm	E7.25				HEY1
MFI121_sc76	TE and derivatives	12 dpf	ExE ectoderm	E7.5				MBNL3
MFI121_sc78	E-AM	12 dpf	Primitive Streak	E7.25				CCNE1
MFI121_sc79	TE and derivatives	12 dpf	ExE ectoderm	E7.5				JUND
MFI121_sc80	TE and derivatives	12 dpf	ExE ectoderm	E7				SLC34A3
MFI121_sc81	EXMC	12 dpf	Haematoendothelial progenitors	E7.5				PCDH8
MFI121_sc84	postE-EPI	12 dpf	Epiblast	E7				IGFBP6
MFI121_sc86	TE and derivatives	12 dpf	ExE ectoderm	E7.5				FSTL3
MFI121_sc87	TE and derivatives	12 dpf	ExE ectoderm	E6.5				S100A13
MFI121_sc88	TE and derivatives	12 dpf	ExE ectoderm	E7.5				STXBP6
MFI121_sc89	TE and derivatives	12 dpf	ExE ectoderm	E6.5				TTC28
MFI121_sc90	TE and derivatives	12 dpf	ExE ectoderm	E7.5				MYL9
MFI121_sc91	TE and derivatives	12 dpf	ExE ectoderm	E7.25				NRG1
MFI121_sc92	TE and derivatives	12 dpf	ExE ectoderm	E7.5				ADAMTS9
MFI121_sc93	VE/YE	12 dpf	Visceral endoderm	E7.25				NOS1
MFI121_sc94	TE and derivatives	12 dpf	ExE ectoderm	E7				EMP2
MFI121_sc95	TE and derivatives	12 dpf	ExE ectoderm	E7.5				AGPAT3
MFI121_sc96	TE and derivatives	12 dpf	ExE ectoderm	E7.5				CDH11
MFI122_sc01	TE and derivatives	12 dpf	ExE ectoderm	E7.5				VTN
MFI122_sc02	postE-EPI	12 dpf	Epiblast	E7				LURAP1L
MFI122_sc03	TE and derivatives	12 dpf	ExE ectoderm	E7.25				CXCR4
MFI122_sc04	TE and derivatives	12 dpf	ExE ectoderm	E7.5				ACKR3
MFI122_sc06	TE and derivatives	12 dpf	ExE ectoderm	E7.5				NTN1
MFI122_sc07	VE/YE	12 dpf	ExE endoderm	E7				DLL1
MFI122_sc08	TE and derivatives	12 dpf	ExE ectoderm	E7.5				SYNDIG1L
MFI122_sc09	TE and derivatives	12 dpf	ExE ectoderm	E7				TSPAN9
MFI122_sc10	postE-EPI	12 dpf	Nascent mesoderm	E7.25				HAND2
MFI122_sc11	TE and derivatives	12 dpf	ExE ectoderm	E7.5				IER2
MFI122_sc12	TE and derivatives	12 dpf	ExE ectoderm	E7.5				EFEMP1
MFI122_sc13	postE-EPI	12 dpf	Primitive Streak	E7.25				TGFB1I1
MFI122_sc14	TE and derivatives	12 dpf	ExE ectoderm	E7.5				CHRNA9
MFI122_sc15	TE and derivatives	12 dpf	ExE ectoderm	E7.5				PRSS35
MFI122_sc16	TE and derivatives	12 dpf	ExE ectoderm	E7				CCDC68
MFI122_sc17	TE and derivatives	12 dpf	ExE ectoderm	E7.5				DLL4
MFI122_sc18	TE and derivatives	12 dpf	ExE ectoderm	E7.5				CNTNAP2
MFI122_sc19	TE and derivatives	12 dpf	ExE ectoderm	E7.5				NID2
MFI122_sc20	VE/YE	12 dpf	ExE endoderm	E7				SERPINC1
MFI122_sc21	TE and derivatives	12 dpf	ExE ectoderm	E7.5				DENND5B
MFI122_sc22	TE and derivatives	12 dpf	ExE ectoderm	E7				PALLD
MFI122_sc24	TE and derivatives	12 dpf	ExE ectoderm	E7.5				LGI1
MFI122_sc25	VE/YE	12 dpf	Visceral endoderm	E6.75				TSPAN33
MFI122_sc27	EXMC	12 dpf	Haematoendothelial progenitors	E7.25				TCF7L2
MFI122_sc28	TE and derivatives	12 dpf	ExE ectoderm	E7.25				BACE2
MFI122_sc29	TE and derivatives	12 dpf	ExE ectoderm	E7.5				PPP1R16B
MFI122_sc30	TE and derivatives	12 dpf	ExE ectoderm	E7.5				MYOZ1
MFI122_sc31	TE and derivatives	12 dpf	ExE ectoderm	E7.5				RGS16
MFI122_sc32	TE and derivatives	12 dpf	ExE ectoderm	E7.5				SPINK8
MFI122_sc33	postE-EPI	12 dpf	Epiblast	E7				TMEM25
MFI122_sc35	TE and derivatives	12 dpf	ExE ectoderm	E7.5				LDLR
MFI122_sc36	TE and derivatives	12 dpf	ExE ectoderm	E7.5				RCN1
MFI122_sc37	E-AM	12 dpf	ExE ectoderm	E7.5				TNFRSF19
MFI122_sc38	EXMC	12 dpf	Haematoendothelial progenitors	E7				CPA2
MFI122_sc39	TE and derivatives	12 dpf	ExE ectoderm	E7.5				ALPK2
MFI122_sc40	EXMC	12 dpf	Haematoendothelial progenitors	E7.25				LIMCH1
MFI122_sc41	TE and derivatives	12 dpf	ExE ectoderm	E7.5				MYBPC2
MFI122_sc42	TE and derivatives	12 dpf	ExE ectoderm	E7.5				VSX1
MFI122_sc43	TE and derivatives	12 dpf	ExE ectoderm	E7.5				CD200
MFI122_sc44	E-AM	12 dpf	Primitive Streak	E7				ARHGEF3
MFI122_sc45	TE and derivatives	12 dpf	ExE ectoderm	E7.25				CACNA1A
MFI122_sc46	VE/YE	12 dpf	Visceral endoderm	E7				PTN
MFI122_sc47	EXMC	12 dpf	Haematoendothelial progenitors	E7				APOE
MFI122_sc49	postE-EPI	12 dpf	Epiblast	E7				APOM
MFI122_sc50	postE-EPI	12 dpf	Epiblast	E7				SRGN
MFI122_sc51	E-AM	12 dpf	Epiblast	E7				CTSH
MFI122_sc52	TE and derivatives	12 dpf	ExE ectoderm	E6.5				AMN
MFI122_sc53	E-Gast	12 dpf	Epiblast	E7				CITED1
MFI122_sc55	TE and derivatives	12 dpf	ExE ectoderm	E7				ETV2
MFI122_sc56	VE/YE	12 dpf	Visceral endoderm	E7				LGMN
MFI122_sc57	postE-EPI	12 dpf	Epiblast	E7				APOA4
MFI122_sc59	EXMC	12 dpf	PGC	E7.25				AQP8
MFI122_sc60	TE and derivatives	12 dpf	ExE ectoderm	E7				NPL
MFI122_sc61	TE and derivatives	12 dpf	ExE ectoderm	E7.5				CTSB
MFI122_sc62	TE and derivatives	12 dpf	ExE ectoderm	E7				CD63
MFI122_sc63	EXMC	12 dpf	Haematoendothelial progenitors	E7.25				SERPINH1
MFI122_sc64	TE and derivatives	12 dpf	ExE ectoderm	E7.5				ELF5
MFI122_sc65	TE and derivatives	12 dpf	ExE ectoderm	E7.5				UPP1
MFI122_sc66	E-AM	12 dpf	Epiblast	E7				CA7
MFI122_sc67	TE and derivatives	12 dpf	ExE ectoderm	E7.25				SFN
MFI122_sc68	TE and derivatives	12 dpf	ExE ectoderm	E7.5				FGFBP1
MFI122_sc69	EXMC	12 dpf	Nascent mesoderm	E7.25				LAMA1
MFI122_sc70	TE and derivatives	12 dpf	ExE ectoderm	E7.5				GJB3
MFI122_sc71	EXMC	12 dpf	Haematoendothelial progenitors	E7.25				S100G
MFI122_sc72	TE and derivatives	12 dpf	ExE ectoderm	E7				PLA2G12B
MFI122_sc73	TE and derivatives	12 dpf	ExE ectoderm	E7.25				TPPP3
MFI122_sc74	TE and derivatives	12 dpf	ExE ectoderm	E7.5				CLDN3
MFI122_sc75	TE and derivatives	12 dpf	ExE ectoderm	E7.5				MIXL1
MFI122_sc76	E-AM	12 dpf	Epiblast	E7				TMEM37
MFI122_sc77	postE-EPI	12 dpf	Epiblast	E7				CTSZ
MFI122_sc78	TE and derivatives	12 dpf	ExE ectoderm	E7.5				DQX1
MFI122_sc79	TE and derivatives	12 dpf	ExE ectoderm	E6.5				ASCL2
MFI122_sc80	E-AM	12 dpf	PGC	E7.25				ANXA5
MFI122_sc81	EXMC	12 dpf	Haematoendothelial progenitors	E7				NR0B1
MFI122_sc82	postE-EPI	12 dpf	Epiblast	E7				ALDOB
MFI122_sc83	TE and derivatives	12 dpf	ExE ectoderm	E7.5				KRT19
MFI122_sc84	TE and derivatives	12 dpf	ExE ectoderm	E7.25				SPP2
MFI122_sc86	postE-EPI	12 dpf	Epiblast	E7				FGF8
MFI122_sc87	postE-EPI	12 dpf	Epiblast	E7				RNF128
MFI122_sc88	TE and derivatives	12 dpf	ExE ectoderm	E7.5				SLC25A4
MFI122_sc89	TE and derivatives	12 dpf	ExE ectoderm	E7.5				AQP3
MFI122_sc90	postE-EPI	12 dpf	Epiblast	E7				DPPA4
MFI122_sc91	TE and derivatives	12 dpf	ExE ectoderm	E7.5				KDELR3
MFI122_sc92	TE and derivatives	12 dpf	ExE ectoderm	E7				FOXJ1
MFI122_sc94	TE and derivatives	12 dpf	ExE ectoderm	E7.5				GOLGA3
MFI122_sc95	TE and derivatives	12 dpf	ExE ectoderm	E7				AGL
MFI122_sc96	E-AM	12 dpf	Surface ectoderm	E7.25				FOXF1
MFI123_sc02	postE-EPI	12 dpf	Epiblast	E7.25				ZFP42
MFI123_sc03	postE-EPI	12 dpf	Epiblast	E7				LMO1
MFI123_sc06	E-Gast	12 dpf	Primitive Streak	E7.25				SP5
MFI123_sc11	VE/YE	12 dpf	ExE endoderm	E7				GJB5
MFI123_sc15	TE and derivatives	12 dpf	ExE ectoderm	E7				SFRP5
MFI123_sc25	postE-EPI	12 dpf	Epiblast	E7				S100A10
MFI123_sc26	E-AM	12 dpf	Nascent mesoderm	E7				FGF3
MFI123_sc29	postE-EPI	12 dpf	Epiblast	E7				FOXA2
MFI123_sc30	EXMC	12 dpf	Haematoendothelial progenitors	E7.25				DUOXA2
MFI123_sc36	EXMC	12 dpf	Haematoendothelial progenitors	E7.5				LAMC1
MFI123_sc46	TE and derivatives	12 dpf	ExE ectoderm	E7.25				ASS1
MFI123_sc47	TE and derivatives	12 dpf	ExE ectoderm	E7.5				MSX1
MFI123_sc48	EXMC	12 dpf	Haematoendothelial progenitors	E7.5				PCBD1
MFI123_sc49	TE and derivatives	12 dpf	ExE ectoderm	E7				WNT6
MFI123_sc53	postE-EPI	12 dpf	Epiblast	E7				P4HA2
MFI123_sc54	TE and derivatives	12 dpf	ExE ectoderm	E7				PTH1R
MFI123_sc58	VE/YE	12 dpf	Visceral endoderm	E7				HBE1
MFI123_sc59	VE/YE	12 dpf	ExE endoderm	E7.25				PHLDA1
MFI123_sc60	TE and derivatives	12 dpf	ExE ectoderm	E7.5				TAL1
MFI123_sc62	EXMC	12 dpf	Mixed mesoderm	E7.25				AMOT
MFI123_sc66	EXMC	12 dpf	Haematoendothelial progenitors	E7.5				BCR
MFI123_sc71	EXMC	12 dpf	Nascent mesoderm	E7				RBP1
MFI123_sc73	EXMC	12 dpf	Mixed mesoderm	E7				TMEM150A
MFI123_sc89	VE/YE	12 dpf	ExE endoderm	E7				GIPC2
MFI124_sc01	TE and derivatives	12 dpf	ExE ectoderm	E6.5				TFPI
MFI124_sc03	TE and derivatives	12 dpf	ExE ectoderm	E7.5				CLIC6
MFI124_sc11	TE and derivatives	12 dpf	ExE ectoderm	E7.5				GPC4
MFI124_sc13	TE and derivatives	12 dpf	ExE ectoderm	E6.5				TEKT1
MFI124_sc14	postE-EPI	12 dpf	Epiblast	E7				POU3F1
MFI124_sc18	TE and derivatives	12 dpf	ExE ectoderm	E7.5				MESP2
MFI124_sc24	EXMC	12 dpf	Mixed mesoderm	E7				LXN
MFI124_sc29	EXMC	12 dpf	Epiblast	E7				PTCRA
MFI124_sc30	EXMC	12 dpf	Nascent mesoderm	E7.25				SLC39A5
MFI124_sc32	TE and derivatives	12 dpf	ExE ectoderm	E7.5				FMR1NB
MFI124_sc36	TE and derivatives	12 dpf	ExE ectoderm	E7.25				NOTO
MFI124_sc40	TE and derivatives	12 dpf	ExE ectoderm	E7				REEP6
MFI124_sc43	TE and derivatives	12 dpf	ExE ectoderm	E7.5				RNASE4
MFI124_sc48	TE and derivatives	12 dpf	ExE ectoderm	E7				LOXL2
MFI124_sc57	VE/YE	12 dpf	ExE endoderm	E7				PRSS50
MFI124_sc65	TE and derivatives	12 dpf	ExE ectoderm	E7.5				TCN2
MFI124_sc71	VE/YE	12 dpf	ExE endoderm	E7.25				SMLR1
MFI124_sc78	postE-EPI	12 dpf	Epiblast	E7.25				COMT
MFI124_sc79	TE and derivatives	12 dpf	ExE ectoderm	E7.5				PRSS12
MFI124_sc81	postE-EPI	12 dpf	Primitive Streak	E7				CDX4
MFI124_sc92	EXMC	12 dpf	Haematoendothelial progenitors	E7.5				AARD
MFI124_sc93	postE-EPI	12 dpf	Epiblast	E7				LECT2
MFI125_sc05	EXMC	12 dpf	Mixed mesoderm	E7				ANXA2
MFI125_sc06	EXMC	12 dpf	Mixed mesoderm	E7				CD8A
MFI125_sc07	EXMC	12 dpf	Mixed mesoderm	E7				GPX4
MFI125_sc11	EXMC	12 dpf	Haematoendothelial progenitors	E7				RAB4A
MFI125_sc12	TE and derivatives	12 dpf	ExE ectoderm	E7				DYNLRB2
MFI125_sc17	VE/YE	12 dpf	ExE endoderm	E7				ATP6V0B
MFI125_sc18	postE-EPI	12 dpf	Primitive Streak	E7				TAGLN2
MFI125_sc20	TE and derivatives	12 dpf	ExE ectoderm	E7.5				LAMB1
MFI125_sc21	TE and derivatives	12 dpf	ExE ectoderm	E7.5				CPNE3
MFI125_sc22	EXMC	12 dpf	Haematoendothelial progenitors	E7				FLI1
MFI125_sc25	TE and derivatives	12 dpf	ExE ectoderm	E7.5				DUSP9
MFI125_sc30	TE and derivatives	12 dpf	ExE ectoderm	E7				UBE2C
MFI125_sc36	TE and derivatives	12 dpf	ExE ectoderm	E7.5				PEG10
MFI125_sc38	postE-EPI	12 dpf	Epiblast	E7				DNAJB13
MFI125_sc39	E-Gast	12 dpf	Epiblast	E7				GNG12
MFI125_sc40	E-AM	12 dpf	Primitive Streak	E7.25				HBZ
MFI125_sc44	E-AM	12 dpf	PGC	E7.25				NRK
MFI125_sc46	postE-EPI	12 dpf	Epiblast	E7.25				PPIC
MFI125_sc47	TE and derivatives	12 dpf	ExE ectoderm	E7.5				RBM38
MFI125_sc53	TE and derivatives	12 dpf	ExE ectoderm	E7.5				DPPA2
MFI125_sc55	TE and derivatives	12 dpf	ExE ectoderm	E7.5				CYSTM1
MFI125_sc61	EXMC	12 dpf	Nascent mesoderm	E7				CREB3L3
MFI125_sc65	VE/YE	12 dpf	ExE endoderm	E7.25				TMEM114
MFI125_sc66	TE and derivatives	12 dpf	ExE ectoderm	E7				FXYD3
MFI125_sc67	TE and derivatives	12 dpf	ExE ectoderm	E7				INPP1
MFI125_sc68	postE-EPI	12 dpf	Epiblast	E7				PTGER3
MFI125_sc70	EXMC	12 dpf	Haematoendothelial progenitors	E7				BAZ1A
MFI125_sc73	TE and derivatives	12 dpf	ExE ectoderm	E7.5				GATA1
MFI125_sc75	EXMC	12 dpf	Haematoendothelial progenitors	E7				GFI1B
MFI125_sc82	VE/YE	12 dpf	ExE endoderm	E6.75				SAMD3
MFI125_sc83	E-Gast	12 dpf	Nascent mesoderm	E7.25				ZAN
MFI125_sc89	EXMC	12 dpf	Mixed mesoderm	E7				CKB
MFI125_sc91	VE/YE	12 dpf	Visceral endoderm	E7				SLC7A9
MFI125_sc92	EXMC	12 dpf	Haematoendothelial progenitors	E7				HEBP1
MFI131_sc33	TE and derivatives	13 dpf	ExE ectoderm	E7.25				HSPA12B
MFI131_sc34	TE and derivatives	13 dpf	ExE ectoderm	E7.5				OAT
MFI131_sc35	postE-EPI	13 dpf	Epiblast	E7				EFNA3
MFI131_sc36	TE and derivatives	13 dpf	ExE ectoderm	E7.25				SNAI1
MFI131_sc37	TE and derivatives	13 dpf	ExE ectoderm	E7.25				RBMS1
MFI131_sc39	TE and derivatives	13 dpf	ExE ectoderm	E7.25				ALOX15
MFI131_sc40	TE and derivatives	13 dpf	ExE ectoderm	E7.25				HOXB2
MFI131_sc41	TE and derivatives	13 dpf	ExE ectoderm	E7.25				SLC6A2
MFI131_sc42	TE and derivatives	13 dpf	ExE ectoderm	E7.25				CLDN6
MFI131_sc43	EXMC	13 dpf	Haematoendothelial progenitors	E7				BAMBI
MFI131_sc44	E-AM	13 dpf	PGC	E7.25				AQP11
MFI131_sc45	VE/YE	13 dpf	ExE ectoderm	E7.25				WNT7B
MFI131_sc46	TE and derivatives	13 dpf	ExE ectoderm	E7.25				TACSTD2
MFI131_sc47	TE and derivatives	13 dpf	ExE ectoderm	E7.25				DNMT3L
MFI131_sc48	TE and derivatives	13 dpf	ExE ectoderm	E7				GATA6
MFI131_sc49	EXMC	13 dpf	Mixed mesoderm	E7				KLF5
MFI131_sc50	TE and derivatives	13 dpf	ExE ectoderm	E7				KLHL13
MFI131_sc51	TE and derivatives	13 dpf	ExE ectoderm	E7.5				KDR
MFI131_sc52	TE and derivatives	13 dpf	ExE ectoderm	E7.5				SLC39A8
MFI131_sc53	EXMC	13 dpf	Haematoendothelial progenitors	E7				KLHL22
MFI131_sc54	postE-EPI	13 dpf	Primitive Streak	E7.5				CHRD
MFI131_sc55	TE and derivatives	13 dpf	ExE ectoderm	E7.25				HAUS8
MFI131_sc56	TE and derivatives	13 dpf	ExE ectoderm	E7.5				NRIP3
MFI131_sc57	postE-EPI	13 dpf	Epiblast	E7				CNN2
MFI131_sc58	TE and derivatives	13 dpf	ExE ectoderm	E7.5				MGST3
MFI131_sc59	E-Gast	13 dpf	Primitive Streak	E7.25				BPIFC
MFI131_sc60	E-Gast	13 dpf	Caudal epiblast	E7.5				NDRG1
MFI131_sc61	TE and derivatives	13 dpf	ExE ectoderm	E7.25				SFMBT2
MFI131_sc62	TE and derivatives	13 dpf	ExE ectoderm	E7.25				DNAJC22
MFI131_sc63	TE and derivatives	13 dpf	ExE ectoderm	E7.5				PQLC2
MFI131_sc64	EXMC	13 dpf	Mixed mesoderm	E7				THBD
MFI131_sc65	TE and derivatives	13 dpf	ExE ectoderm	E7				APOC2
MFI131_sc67	TE and derivatives	13 dpf	ExE ectoderm	E7.25				PIFO
MFI131_sc68	TE and derivatives	13 dpf	ExE ectoderm	E7.25				SMAGP
MFI131_sc69	TE and derivatives	13 dpf	ExE ectoderm	E7.25				NOSTRIN
MFI131_sc70	EXMC	13 dpf	Haematoendothelial progenitors	E7.25				NEU1
MFI131_sc71	TE and derivatives	13 dpf	ExE ectoderm	E7				ASB4
MFI131_sc72	TE and derivatives	13 dpf	ExE ectoderm	E7.25				CLTA
MFI131_sc73	TE and derivatives	13 dpf	ExE ectoderm	E7.5				SLC7A7
MFI131_sc74	postE-EPI	13 dpf	ExE ectoderm	E7.5				GAS1
MFI131_sc75	EXMC	13 dpf	ExE ectoderm	E7.5				PHLDA3
MFI131_sc76	TE and derivatives	13 dpf	ExE ectoderm	E7.25				CCNO
MFI131_sc77	E-AM	13 dpf	PGC	E7.25				UBASH3B
MFI131_sc78	TE and derivatives	13 dpf	ExE ectoderm	E7.25				NAT8L
MFI131_sc79	EXMC	13 dpf	Mixed mesoderm	E7.25				IGFBP1
MFI131_sc80	TE and derivatives	13 dpf	ExE ectoderm	E7.25				SCIN
MFI131_sc81	TE and derivatives	13 dpf	ExE ectoderm	E7.5				TULP3
MFI131_sc82	TE and derivatives	13 dpf	ExE ectoderm	E7.25				LAPTM4B
MFI131_sc83	TE and derivatives	13 dpf	ExE ectoderm	E7.25				IGFBP4
MFI131_sc84	TE and derivatives	13 dpf	ExE ectoderm	E7.25				TUBB6
MFI131_sc85	TE and derivatives	13 dpf	ExE ectoderm	E7.25				PTPRO
MFI131_sc86	TE and derivatives	13 dpf	ExE ectoderm	E7				PSMB8
MFI131_sc87	TE and derivatives	13 dpf	ExE ectoderm	E7.25				KLHL6
MFI131_sc88	EXMC	13 dpf	Mixed mesoderm	E7.5				SLC32A1
MFI131_sc89	TE and derivatives	13 dpf	ExE ectoderm	E7.25				HOXB6
MFI131_sc90	EXMC	13 dpf	Haematoendothelial progenitors	E7.5				EMILIN1
MFI131_sc91	TE and derivatives	13 dpf	ExE ectoderm	E7.5				RTP4
MFI131_sc92	TE and derivatives	13 dpf	ExE ectoderm	E7.5				FAM83A
MFI131_sc93	TE and derivatives	13 dpf	ExE ectoderm	E7.25				NKD1
MFI131_sc94	TE and derivatives	13 dpf	ExE ectoderm	E7.25				FOXC2
MFI131_sc95	TE and derivatives	13 dpf	ExE ectoderm	E7				ARL4D
MFI131_sc96	TE and derivatives	13 dpf	ExE ectoderm	E7.25				FGF5
MFI132_sc02	TE and derivatives	13 dpf	ExE ectoderm	E7.25				SERPING1
MFI132_sc03	TE and derivatives	13 dpf	ExE ectoderm	E7.25				BATF3
MFI132_sc04	TE and derivatives	13 dpf	ExE ectoderm	E7.5				PLA2G5
MFI132_sc06	EXMC	13 dpf	Haematoendothelial progenitors	E7.5				PXDC1
MFI132_sc07	VE/YE	13 dpf	Visceral endoderm	E7				TMEM245
MFI132_sc08	TE and derivatives	13 dpf	ExE ectoderm	E7.25				EFNB1
MFI132_sc09	EXMC	13 dpf	Haematoendothelial progenitors	E7.5				MPZL2
MFI132_sc10	EXMC	13 dpf	Mixed mesoderm	E7.5				CLDN7
MFI132_sc12	TE and derivatives	13 dpf	ExE ectoderm	E7.5				FAM89A
MFI132_sc13	postE-EPI	13 dpf	Epiblast	E7				STMN1
MFI132_sc14	TE and derivatives	13 dpf	ExE ectoderm	E7.25				PHKG1
MFI132_sc19	TE and derivatives	13 dpf	ExE ectoderm	E7.5				FEV
MFI132_sc20	TE and derivatives	13 dpf	ExE ectoderm	E7.5				RASGRP2
MFI132_sc21	TE and derivatives	13 dpf	ExE ectoderm	E7.5				RPL22L1
MFI132_sc22	E-AM	13 dpf	PGC	E7.25				CCNB1
MFI132_sc23	TE and derivatives	13 dpf	ExE ectoderm	E7.25				HKDC1
MFI132_sc24	TE and derivatives	13 dpf	ExE ectoderm	E7.25				JUN
MFI132_sc25	VE/YE	13 dpf	Visceral endoderm	E7				NPM3
MFI132_sc27	EXMC	13 dpf	Haematoendothelial progenitors	E7				CLIC1
MFI132_sc28	TE and derivatives	13 dpf	ExE ectoderm	E7.5				HOXB5
MFI132_sc31	E-Gast	13 dpf	Rostral neurectoderm	E7.5				TMPRSS2
MFI132_sc32	TE and derivatives	13 dpf	ExE ectoderm	E7				LMO4
MFI132_sc33	TE and derivatives	13 dpf	ExE ectoderm	E7.5				CPN1
MFI132_sc35	TE and derivatives	13 dpf	ExE ectoderm	E7				CIB1
MFI132_sc36	TE and derivatives	13 dpf	ExE ectoderm	E7.5				SGCE
MFI132_sc37	EXMC	13 dpf	Haematoendothelial progenitors	E7				APRT
MFI132_sc38	EXMC	13 dpf	Haematoendothelial progenitors	E7.5				CLDN2
MFI132_sc39	postE-EPI	13 dpf	Epiblast	E7				ELF3
MFI132_sc40	postE-EPI	13 dpf	Epiblast	E7.25				IRX3
MFI132_sc41	postE-EPI	13 dpf	Epiblast	E7				RIIAD1
MFI132_sc42	EXMC	13 dpf	Haematoendothelial progenitors	E7				SLC2A1
MFI132_sc43	postE-EPI	13 dpf	Epiblast	E7				MFSD1
MFI132_sc44	TE and derivatives	13 dpf	ExE ectoderm	E7.25				GAL
MFI132_sc45	EXMC	13 dpf	Haematoendothelial progenitors	E7				APLN
MFI132_sc46	postE-EPI	13 dpf	Epiblast	E7				MPC2
MFI132_sc47	E-Gast	13 dpf	Epiblast	E7
MFI132_sc48	EXMC	13 dpf	Haematoendothelial progenitors	E7
MFI132_sc49	postE-EPI	13 dpf	Epiblast	E7
MFI132_sc51	E-AM	13 dpf	Primitive Streak	E6.5
MFI132_sc52	TE and derivatives	13 dpf	ExE ectoderm	E7.5
MFI132_sc53	TE and derivatives	13 dpf	ExE ectoderm	E7.5
MFI132_sc55	postE-EPI	13 dpf	Epiblast	E7
MFI132_sc56	TE and derivatives	13 dpf	ExE ectoderm	E7.25
MFI132_sc57	TE and derivatives	13 dpf	ExE ectoderm	E7.5
MFI132_sc58	EXMC	13 dpf	Haematoendothelial progenitors	E7.25
MFI132_sc59	postE-EPI	13 dpf	Epiblast	E7
MFI132_sc60	TE and derivatives	13 dpf	ExE ectoderm	E7.25
MFI132_sc61	TE and derivatives	13 dpf	ExE ectoderm	E7
MFI132_sc62	TE and derivatives	13 dpf	ExE ectoderm	E7
MFI132_sc63	TE and derivatives	13 dpf	ExE ectoderm	E7.25
MFI132_sc64	TE and derivatives	13 dpf	ExE ectoderm	E7
MFI132_sc82	postE-EPI	13 dpf	Epiblast	E7
MFI132_sc83	EXMC	13 dpf	Haematoendothelial progenitors	E7.5
MFI132_sc84	TE and derivatives	13 dpf	ExE ectoderm	E7.25
MFI132_sc86	TE and derivatives	13 dpf	ExE ectoderm	E7.25
MFI132_sc87	EXMC	13 dpf	Haematoendothelial progenitors	E7.5
MFI132_sc88	postE-EPI	13 dpf	Epiblast	E7
MFI132_sc89	TE and derivatives	13 dpf	ExE ectoderm	E7.25
MFI132_sc91	EXMC	13 dpf	ExE ectoderm	E7.5
MFI132_sc92	VE/YE	13 dpf	Visceral endoderm	E7
MFI132_sc93	TE and derivatives	13 dpf	ExE ectoderm	E7.5
MFI132_sc94	EXMC	13 dpf	Haematoendothelial progenitors	E7.5
MFI132_sc96	TE and derivatives	13 dpf	ExE ectoderm	E7.25
MFI133_sc09	E-AM	13 dpf	Surface ectoderm	E7.5
MFI133_sc19	EXMC	13 dpf	Haematoendothelial progenitors	E7.5
MFI133_sc33	EXMC	13 dpf	Haematoendothelial progenitors	E7.5
MFI133_sc39	EXMC	13 dpf	Haematoendothelial progenitors	E7.25
MFI133_sc53	EXMC	13 dpf	Nascent mesoderm	E7.25
MFI133_sc54	EXMC	13 dpf	Haematoendothelial progenitors	E7.5
MFI133_sc56	EXMC	13 dpf	Mesenchyme	E7.5
MFI133_sc57	VE/YE	13 dpf	Visceral endoderm	E6.75
MFI133_sc58	EXMC	13 dpf	Mixed mesoderm	E7.5
MFI133_sc59	E-AM	13 dpf	Primitive Streak	E7.5
MFI133_sc60	L-Gast1	13 dpf	Epiblast	E7
MFI133_sc61	EXMC	13 dpf	Mixed mesoderm	E7
MFI133_sc62	EXMC	13 dpf	Haematoendothelial progenitors	E7
MFI133_sc64	EXMC	13 dpf	Haematoendothelial progenitors	E7
MFI133_sc69	TE and derivatives	13 dpf	ExE ectoderm	E7.25
MFI133_sc72	EXMC	13 dpf	Nascent mesoderm	E7
MFI133_sc73	EXMC	13 dpf	Mesenchyme	E7.5
MFI133_sc74	EXMC	13 dpf	Mesenchyme	E7.5
MFI133_sc75	VE/YE	13 dpf	ExE endoderm	E7
MFI133_sc76	EXMC	13 dpf	Haematoendothelial progenitors	E7
MFI133_sc77	postE-EPI	13 dpf	Epiblast	E7
MFI133_sc79	VE/YE	13 dpf	ExE endoderm	E7
MFI133_sc80	EXMC	13 dpf	Haematoendothelial progenitors	E7.5
MFI133_sc82	EXMC	13 dpf	Haematoendothelial progenitors	E7.25
MFI133_sc83	EXMC	13 dpf	Mixed mesoderm	E7
MFI133_sc84	EXMC	13 dpf	Mixed mesoderm	E7.25
MFI133_sc85	L-Gast2	13 dpf	Nascent mesoderm	E7.5
MFI133_sc86	EXMC	13 dpf	Mixed mesoderm	E7.25
MFI133_sc87	EXMC	13 dpf	Mesenchyme	E7.5
MFI133_sc88	EXMC	13 dpf	Haematoendothelial progenitors	E7.5
MFI133_sc89	VE/YE	13 dpf	ExE endoderm	E7.25
MFI133_sc90	VE/YE	13 dpf	ExE endoderm	E7
MFI133_sc92	L-AM2	13 dpf	ExE mesoderm	E7
MFI133_sc93	E-AM	13 dpf	PGC	E7.25
MFI133_sc94	EXMC	13 dpf	Mixed mesoderm	E7
MFI133_sc95	VE/YE	13 dpf	Visceral endoderm	E7
MFI133_sc96	postE-EPI	13 dpf	Primitive Streak	E7
MFI141_sc02	EXMC	14 dpf	Haematoendothelial progenitors	E7.5
MFI141_sc03	EXMC	14 dpf	ExE mesoderm	E7.5
MFI141_sc04	EXMC	14 dpf	Parietal endoderm	E7.25
MFI141_sc05	EXMC	14 dpf	ExE ectoderm	E7
MFI141_sc06	TE and derivatives	14 dpf	ExE ectoderm	E7.5
MFI141_sc07	EXMC	14 dpf	Haematoendothelial progenitors	E7.25
MFI141_sc08	TE and derivatives	14 dpf	ExE ectoderm	E7.5
MFI141_sc09	EXMC	14 dpf	Haematoendothelial progenitors	E7.5
MFI141_sc10	EXMC	14 dpf	Haematoendothelial progenitors	E7
MFI141_sc11	EXMC	14 dpf	Haematoendothelial progenitors	E7.5
MFI141_sc12	EXMC	14 dpf	ExE ectoderm	E7.25
MFI141_sc13	EXMC	14 dpf	Haematoendothelial progenitors	E7.5
MFI141_sc14	EXMC	14 dpf	Mesenchyme	E7.5
MFI141_sc15	TE and derivatives	14 dpf	ExE ectoderm	E7.25
MFI141_sc16	VE/YE	14 dpf	ExE endoderm	E6.75
MFI141_sc17	EXMC	14 dpf	Mesenchyme	E7.25
MFI141_sc18	EXMC	14 dpf	Mesenchyme	E7.5
MFI141_sc19	TE and derivatives	14 dpf	ExE ectoderm	E7.5
MFI141_sc20	TE and derivatives	14 dpf	ExE ectoderm	E6.5
MFI141_sc21	EXMC	14 dpf	Haematoendothelial progenitors	E7.25
MFI141_sc22	TE and derivatives	14 dpf	ExE ectoderm	E7
MFI141_sc23	EXMC	14 dpf	Nascent mesoderm	E7
MFI141_sc25	EXMC	14 dpf	Haematoendothelial progenitors	E7.5
MFI141_sc26	TE and derivatives	14 dpf	ExE ectoderm	E7.5
MFI141_sc27	EXMC	14 dpf	Haematoendothelial progenitors	E7.5
MFI141_sc28	EXMC	14 dpf	Haematoendothelial progenitors	E7
MFI141_sc29	postE-EPI	14 dpf	Epiblast	E7
MFI141_sc30	EXMC	14 dpf	Haematoendothelial progenitors	E7.5
MFI141_sc31	EXMC	14 dpf	Parietal endoderm	E7
MFI141_sc32	EXMC	14 dpf	Parietal endoderm	E7.25
MFI141_sc35	EXMC	14 dpf	Haematoendothelial progenitors	E7.25
MFI141_sc36	E-AM	14 dpf	Primitive Streak	E7
MFI141_sc38	EXMC	14 dpf	Haematoendothelial progenitors	E7.5
MFI141_sc39	EXMC	14 dpf	Haematoendothelial progenitors	E7
MFI141_sc41	EXMC	14 dpf	Parietal endoderm	E7.25
MFI141_sc42	EXMC	14 dpf	Haematoendothelial progenitors	E7.25
MFI141_sc43	EXMC	14 dpf	Haematoendothelial progenitors	E7.25
MFI141_sc44	EXMC	14 dpf	Haematoendothelial progenitors	E7
MFI141_sc45	EXMC	14 dpf	Haematoendothelial progenitors	E7
MFI141_sc46	EXMC	14 dpf	Haematoendothelial progenitors	E7.25
MFI141_sc47	EXMC	14 dpf	Mesenchyme	E7.5
MFI141_sc51	EXMC	14 dpf	Mixed mesoderm	E7.25
MFI141_sc53	TE and derivatives	14 dpf	ExE ectoderm	E7.25
MFI141_sc54	TE and derivatives	14 dpf	ExE ectoderm	E7.5
MFI141_sc55	EXMC	14 dpf	Haematoendothelial progenitors	E7.25
MFI141_sc56	TE and derivatives	14 dpf	ExE ectoderm	E7
MFI141_sc57	EXMC	14 dpf	Haematoendothelial progenitors	E7.5
MFI141_sc58	EXMC	14 dpf	Nascent mesoderm	E7
MFI141_sc59	EXMC	14 dpf	Haematoendothelial progenitors	E7.5
MFI141_sc61	EXMC	14 dpf	ExE ectoderm	E7.25
MFI141_sc62	EXMC	14 dpf	Haematoendothelial progenitors	E7.25
MFI141_sc63	EXMC	14 dpf	Haematoendothelial progenitors	E7.5
MFI141_sc64	EXMC	14 dpf	Parietal endoderm	E7.25
MFI141_sc65	postE-EPI	14 dpf	Epiblast	E7
MFI141_sc66	EXMC	14 dpf	Haematoendothelial progenitors	E7.5
MFI141_sc68	EXMC	14 dpf	Haematoendothelial progenitors	E7
MFI141_sc69	EXMC	14 dpf	Haematoendothelial progenitors	E7.5
MFI141_sc70	EXMC	14 dpf	Haematoendothelial progenitors	E7.5
MFI141_sc71	EXMC	14 dpf	Haematoendothelial progenitors	E7.5
MFI141_sc74	EXMC	14 dpf	Mesenchyme	E7.5
MFI141_sc76	EXMC	14 dpf	Parietal endoderm	E7.25
MFI141_sc78	EXMC	14 dpf	Haematoendothelial progenitors	E7.5
MFI141_sc79	TE and derivatives	14 dpf	ExE ectoderm	E7.5
MFI141_sc80	EXMC	14 dpf	Haematoendothelial progenitors	E7.5
MFI141_sc81	EXMC	14 dpf	Haematoendothelial progenitors	E7.5
MFI141_sc85	TE and derivatives	14 dpf	ExE ectoderm	E7.25
MFI141_sc87	EXMC	14 dpf	Haematoendothelial progenitors	E7
MFI141_sc88	EXMC	14 dpf	Haematoendothelial progenitors	E7
MFI141_sc90	EXMC	14 dpf	Haematoendothelial progenitors	E7.25
MFI141_sc91	EXMC	14 dpf	Haematoendothelial progenitors	E7
MFI141_sc92	EXMC	14 dpf	Haematoendothelial progenitors	E7.25
MFI141_sc93	EXMC	14 dpf	Haematoendothelial progenitors	E7.5
MFI141_sc94	EXMC	14 dpf	Haematoendothelial progenitors	E7
MFI141_sc95	EXMC	14 dpf	Haematoendothelial progenitors	E7.5
MFI141_sc96	EXMC	14 dpf	Parietal endoderm	E7.25
MFI142_sc01	E-Gast	14 dpf	Primitive Streak	E7.5
MFI142_sc02	E-Gast	14 dpf	Primitive Streak	E7.5
MFI142_sc04	postE-EPI	14 dpf	Epiblast	E7
MFI142_sc05	postE-EPI	14 dpf	Epiblast	E7
MFI142_sc06	postE-EPI	14 dpf	Epiblast	E7
MFI142_sc07	TE and derivatives	14 dpf	ExE ectoderm	E7.25
MFI142_sc08	postE-EPI	14 dpf	Epiblast	E7
MFI142_sc09	TE and derivatives	14 dpf	ExE ectoderm	E7.5
MFI142_sc10	TE and derivatives	14 dpf	ExE ectoderm	E7.5
MFI142_sc12	E-Gast	14 dpf	Epiblast	E7
MFI142_sc13	TE and derivatives	14 dpf	ExE ectoderm	E7.25
MFI142_sc14	postE-EPI	14 dpf	Epiblast	E7
MFI142_sc15	postE-EPI	14 dpf	Epiblast	E7
MFI142_sc16	TE and derivatives	14 dpf	ExE ectoderm	E6.5
MFI142_sc17	postE-EPI	14 dpf	Epiblast	E7
MFI142_sc18	postE-EPI	14 dpf	Epiblast	E7
MFI142_sc19	postE-EPI	14 dpf	Epiblast	E7.25
MFI142_sc20	E-Gast	14 dpf	Epiblast	E7.5
MFI142_sc21	postE-EPI	14 dpf	Epiblast	E7
MFI142_sc22	postE-EPI	14 dpf	Epiblast	E7
MFI142_sc24	TE and derivatives	14 dpf	ExE ectoderm	E6.5
MFI142_sc25	postE-EPI	14 dpf	Epiblast	E7
MFI142_sc26	TE and derivatives	14 dpf	ExE ectoderm	E7.5
MFI142_sc27	TE and derivatives	14 dpf	ExE ectoderm	E7.25
MFI142_sc29	E-AM	14 dpf	Primitive Streak	E7.25
MFI142_sc30	postE-EPI	14 dpf	Epiblast	E7
MFI142_sc31	postE-EPI	14 dpf	Epiblast	E7
MFI142_sc32	postE-EPI	14 dpf	Epiblast	E7
MFI142_sc33	postE-EPI	14 dpf	Epiblast	E7.5
MFI142_sc35	postE-EPI	14 dpf	Epiblast	E7
MFI142_sc36	postE-EPI	14 dpf	Epiblast	E7
MFI142_sc37	postE-EPI	14 dpf	Epiblast	E7
MFI142_sc38	postE-EPI	14 dpf	Epiblast	E7.25
MFI142_sc41	VE/YE	14 dpf	ExE endoderm	E7.25
MFI142_sc42	postE-EPI	14 dpf	Epiblast	E7
MFI142_sc43	postE-EPI	14 dpf	Epiblast	E7
MFI142_sc44	postE-EPI	14 dpf	Epiblast	E7
MFI142_sc45	postE-EPI	14 dpf	Epiblast	E7
MFI142_sc46	postE-EPI	14 dpf	Epiblast	E7
MFI142_sc47	postE-EPI	14 dpf	Epiblast	E7
MFI142_sc48	postE-EPI	14 dpf	Epiblast	E6.75
MFI142_sc49	postE-EPI	14 dpf	Epiblast	E7
MFI142_sc50	postE-EPI	14 dpf	Epiblast	E7
MFI142_sc51	EXMC	14 dpf	Nascent mesoderm	E7
MFI142_sc52	postE-EPI	14 dpf	Epiblast	E7
MFI142_sc53	E-AM	14 dpf	Epiblast	E7
MFI142_sc54	postE-EPI	14 dpf	Epiblast	E7
MFI142_sc55	postE-EPI	14 dpf	Epiblast	E7
MFI142_sc56	TE and derivatives	14 dpf	ExE ectoderm	E7
MFI142_sc57	E-Gast	14 dpf	Primitive Streak	E7
MFI142_sc59	VE/YE	14 dpf	ExE endoderm	E7.5
MFI142_sc60	TE and derivatives	14 dpf	ExE ectoderm	E7.5
MFI142_sc61	postE-EPI	14 dpf	Epiblast	E7.25
MFI142_sc62	postE-EPI	14 dpf	Epiblast	E7
MFI142_sc63	postE-EPI	14 dpf	Epiblast	E7
MFI142_sc64	postE-EPI	14 dpf	Epiblast	E7
MFI142_sc65	postE-EPI	14 dpf	Epiblast	E7
MFI142_sc66	postE-EPI	14 dpf	Epiblast	E7
MFI142_sc67	TE and derivatives	14 dpf	ExE ectoderm	E7.25
MFI142_sc68	E-Gast	14 dpf	Epiblast	E7
MFI142_sc69	postE-EPI	14 dpf	Epiblast	E7
MFI142_sc70	E-Gast	14 dpf	Epiblast	E7.25
MFI142_sc73	EXMC	14 dpf	Mixed mesoderm	E7.5
MFI142_sc74	postE-EPI	14 dpf	Epiblast	E7
MFI142_sc76	postE-EPI	14 dpf	Epiblast	E7
MFI142_sc77	TE and derivatives	14 dpf	ExE ectoderm	E6.5
MFI142_sc78	E-Gast	14 dpf	Primitive Streak	E7.5
MFI142_sc79	postE-EPI	14 dpf	Epiblast	E7
MFI142_sc80	TE and derivatives	14 dpf	ExE ectoderm	E7.25
MFI142_sc81	E-AM	14 dpf	Surface ectoderm	E7.25
MFI142_sc82	postE-EPI	14 dpf	Epiblast	E7
MFI142_sc83	postE-EPI	14 dpf	Epiblast	E7
MFI142_sc84	postE-EPI	14 dpf	Epiblast	E7
MFI142_sc85	E-Gast	14 dpf	Epiblast	E7
MFI142_sc86	postE-EPI	14 dpf	Epiblast	E7
MFI142_sc87	postE-EPI	14 dpf	Epiblast	E7.25
MFI142_sc88	postE-EPI	14 dpf	Epiblast	E7
MFI142_sc89	TE and derivatives	14 dpf	ExE ectoderm	E7
MFI142_sc90	postE-EPI	14 dpf	Epiblast	E7
MFI142_sc91	postE-EPI	14 dpf	Epiblast	E7
MFI142_sc92	postE-EPI	14 dpf	Epiblast	E7
MFI142_sc93	postE-EPI	14 dpf	Epiblast	E7
MFI142_sc94	postE-EPI	14 dpf	Epiblast	E7
MFI142_sc95	E-Gast	14 dpf	Primitive Streak	E7.5
MFI142_sc96	TE and derivatives	14 dpf	ExE ectoderm	E7
MFI143_sc01	EXMC	14 dpf	Mesenchyme	E7.5
MFI143_sc03	TE and derivatives	14 dpf	ExE ectoderm	E7.25
MFI143_sc05	EXMC	14 dpf	Parietal endoderm	E7.25
MFI143_sc06	EXMC	14 dpf	Haematoendothelial progenitors	E7.5
MFI143_sc07	TE and derivatives	14 dpf	ExE ectoderm	E7
MFI143_sc09	EXMC	14 dpf	Parietal endoderm	E7.25
MFI143_sc11	TE and derivatives	14 dpf	ExE ectoderm	E7.25
MFI143_sc12	TE and derivatives	14 dpf	ExE ectoderm	E7.25
MFI143_sc13	TE and derivatives	14 dpf	ExE ectoderm	E7.25
MFI143_sc14	EXMC	14 dpf	Haematoendothelial progenitors	E7.5
MFI143_sc15	EXMC	14 dpf	Haematoendothelial progenitors	E7
MFI143_sc16	EXMC	14 dpf	Mixed mesoderm	E7.25
MFI143_sc17	EXMC	14 dpf	Haematoendothelial progenitors	E7
MFI143_sc19	TE and derivatives	14 dpf	ExE ectoderm	E7.5
MFI143_sc20	EXMC	14 dpf	Haematoendothelial progenitors	E7.5
MFI143_sc21	EXMC	14 dpf	Mixed mesoderm	E7
MFI143_sc22	EXMC	14 dpf	Parietal endoderm	E7.25
MFI143_sc24	EXMC	14 dpf	Haematoendothelial progenitors	E7.25
MFI143_sc25	EXMC	14 dpf	Parietal endoderm	E7.25
MFI143_sc26	postE-EPI	14 dpf	ExE endoderm	E7
MFI143_sc27	TE and derivatives	14 dpf	ExE ectoderm	E7.25
MFI143_sc28	EXMC	14 dpf	Haematoendothelial progenitors	E7.5
MFI143_sc29	TE and derivatives	14 dpf	ExE ectoderm	E7.25
MFI143_sc30	EXMC	14 dpf	Mesenchyme	E7.5
MFI143_sc31	EXMC	14 dpf	Haematoendothelial progenitors	E7.5
MFI143_sc34	TE and derivatives	14 dpf	ExE ectoderm	E7.25
MFI143_sc35	EXMC	14 dpf	Haematoendothelial progenitors	E7.25
MFI143_sc36	EXMC	14 dpf	Haematoendothelial progenitors	E7.5
MFI143_sc37	EXMC	14 dpf	Haematoendothelial progenitors	E7
MFI143_sc38	TE and derivatives	14 dpf	ExE ectoderm	E7.25
MFI143_sc39	EXMC	14 dpf	Parietal endoderm	E7.25
MFI143_sc40	TE and derivatives	14 dpf	ExE ectoderm	E7.25
MFI143_sc42	EXMC	14 dpf	Mixed mesoderm	E7.25
MFI143_sc43	EXMC	14 dpf	Haematoendothelial progenitors	E7.5
MFI143_sc44	EXMC	14 dpf	Haematoendothelial progenitors	E7.25
MFI143_sc45	EXMC	14 dpf	Haematoendothelial progenitors	E7.25
MFI143_sc46	EXMC	14 dpf	Haematoendothelial progenitors	E7.25
MFI143_sc47	EXMC	14 dpf	Haematoendothelial progenitors	E7.5
MFI143_sc48	TE and derivatives	14 dpf	ExE ectoderm	E7.25
MFI143_sc49	EXMC	14 dpf	Haematoendothelial progenitors	E7.5
MFI143_sc50	EXMC	14 dpf	Haematoendothelial progenitors	E7.5
MFI143_sc51	TE and derivatives	14 dpf	ExE ectoderm	E7.25
MFI143_sc52	EXMC	14 dpf	Haematoendothelial progenitors	E7.5
MFI143_sc53	EXMC	14 dpf	Haematoendothelial progenitors	E7.5
MFI143_sc56	EXMC	14 dpf	Haematoendothelial progenitors	E7.25
MFI143_sc57	EXMC	14 dpf	Parietal endoderm	E7.25
MFI143_sc58	TE and derivatives	14 dpf	ExE ectoderm	E7.25
MFI143_sc59	EXMC	14 dpf	Haematoendothelial progenitors	E7
MFI143_sc60	EXMC	14 dpf	Parietal endoderm	E7.25
MFI143_sc62	EXMC	14 dpf	Haematoendothelial progenitors	E7.25
MFI143_sc63	EXMC	14 dpf	Haematoendothelial progenitors	E7.5
MFI143_sc64	EXMC	14 dpf	Parietal endoderm	E7.25
MFI143_sc65	EXMC	14 dpf	Haematoendothelial progenitors	E7.5
MFI143_sc66	EXMC	14 dpf	Haematoendothelial progenitors	E7
MFI143_sc68	TE and derivatives	14 dpf	ExE ectoderm	E7.5
MFI143_sc69	EXMC	14 dpf	Haematoendothelial progenitors	E7.5
MFI143_sc70	EXMC	14 dpf	Haematoendothelial progenitors	E7
MFI143_sc71	EXMC	14 dpf	Haematoendothelial progenitors	E7.25
MFI143_sc72	EXMC	14 dpf	Haematoendothelial progenitors	E7.25
MFI143_sc73	EXMC	14 dpf	Haematoendothelial progenitors	E7
MFI143_sc74	EXMC	14 dpf	Haematoendothelial progenitors	E7.5
MFI143_sc75	EXMC	14 dpf	Parietal endoderm	E7.25
MFI143_sc76	TE and derivatives	14 dpf	ExE ectoderm	E7.25
MFI143_sc78	EXMC	14 dpf	Parietal endoderm	E7.25
MFI143_sc79	TE and derivatives	14 dpf	ExE ectoderm	E7.5
MFI143_sc80	EXMC	14 dpf	Mixed mesoderm	E7
MFI143_sc81	EXMC	14 dpf	Haematoendothelial progenitors	E7.5
MFI143_sc82	EXMC	14 dpf	Haematoendothelial progenitors	E7
MFI143_sc83	EXMC	14 dpf	Haematoendothelial progenitors	E7.25
MFI143_sc84	EXMC	14 dpf	Haematoendothelial progenitors	E7.5
MFI143_sc85	EXMC	14 dpf	Parietal endoderm	E7.25
MFI143_sc87	TE and derivatives	14 dpf	ExE ectoderm	E7.5
MFI143_sc88	EXMC	14 dpf	Haematoendothelial progenitors	E7.25
MFI143_sc90	EXMC	14 dpf	Haematoendothelial progenitors	E7.5
MFI143_sc91	EXMC	14 dpf	Parietal endoderm	E7.25
MFI143_sc92	EXMC	14 dpf	Haematoendothelial progenitors	E7.5
MFI143_sc93	EXMC	14 dpf	Mixed mesoderm	E7
MFI143_sc95	TE and derivatives	14 dpf	ExE ectoderm	E7.25
MFI143_sc96	EXMC	14 dpf	Mesenchyme	E7.5
MFI144_sc01	E-AM	14 dpf	Epiblast	E7
MFI144_sc02	postE-EPI	14 dpf	Epiblast	E7
MFI144_sc03	EXMC	14 dpf	Haematoendothelial progenitors	E7.25
MFI144_sc04	postE-EPI	14 dpf	Epiblast	E7
MFI144_sc05	EXMC	14 dpf	Haematoendothelial progenitors	E7
MFI144_sc06	E-Gast	14 dpf	Primitive Streak	E7
MFI144_sc07	postE-EPI	14 dpf	Epiblast	E7.5
MFI144_sc08	postE-EPI	14 dpf	Epiblast	E7
MFI144_sc09	E-Gast	14 dpf	Primitive Streak	E7
MFI144_sc10	postE-EPI	14 dpf	Epiblast	E7
MFI144_sc11	TE and derivatives	14 dpf	ExE ectoderm	E6.5
MFI144_sc12	EXMC	14 dpf	Haematoendothelial progenitors	E7
MFI144_sc15	E-Gast	14 dpf	Epiblast	E7.25
MFI144_sc16	postE-EPI	14 dpf	Epiblast	E7.5
MFI144_sc17	E-AM	14 dpf	Primitive Streak	E7
MFI144_sc19	postE-EPI	14 dpf	Epiblast	E7
MFI144_sc20	TE and derivatives	14 dpf	ExE ectoderm	E6.5
MFI144_sc21	postE-EPI	14 dpf	Epiblast	E7.5
MFI144_sc22	TE and derivatives	14 dpf	ExE ectoderm	E6.5
MFI144_sc24	TE and derivatives	14 dpf	ExE ectoderm	E7
MFI144_sc25	E-Gast	14 dpf	Primitive Streak	E7.25
MFI144_sc26	E-Gast	14 dpf	Primitive Streak	E7.25
MFI144_sc28	VE/YE	14 dpf	ExE endoderm	E7.5
MFI144_sc30	E-AM	14 dpf	Caudal epiblast	E7.5
MFI144_sc31	postE-EPI	14 dpf	Epiblast	E7
MFI144_sc32	E-Gast	14 dpf	Primitive Streak	E7.25
MFI144_sc33	postE-EPI	14 dpf	Epiblast	E7.25
MFI144_sc36	E-Gast	14 dpf	Primitive Streak	E7
MFI144_sc37	postE-EPI	14 dpf	Epiblast	E7
MFI144_sc38	postE-EPI	14 dpf	Epiblast	E7
MFI144_sc39	postE-EPI	14 dpf	Epiblast	E7
MFI144_sc40	E-Gast	14 dpf	Caudal epiblast	E7.5
MFI144_sc42	TE and derivatives	14 dpf	ExE ectoderm	E7.5
MFI144_sc44	E-Gast	14 dpf	Primitive Streak	E7.25
MFI144_sc45	postE-EPI	14 dpf	Epiblast	E7
MFI144_sc46	postE-EPI	14 dpf	Epiblast	E7
MFI144_sc47	postE-EPI	14 dpf	Epiblast	E7
MFI144_sc48	postE-EPI	14 dpf	Epiblast	E7
MFI144_sc49	EXMC	14 dpf	Haematoendothelial progenitors	E7.5
MFI144_sc50	postE-EPI	14 dpf	Epiblast	E7
MFI144_sc51	TE and derivatives	14 dpf	ExE ectoderm	E6.5
MFI144_sc52	TE and derivatives	14 dpf	ExE ectoderm	E7.25
MFI144_sc53	TE and derivatives	14 dpf	ExE ectoderm	E7.25
MFI144_sc55	EXMC	14 dpf	Mixed mesoderm	E7
MFI144_sc56	postE-EPI	14 dpf	Epiblast	E7
MFI144_sc57	postE-EPI	14 dpf	Primitive Streak	E7.5
MFI144_sc58	postE-EPI	14 dpf	Epiblast	E7.25
MFI144_sc59	postE-EPI	14 dpf	Epiblast	E7
MFI144_sc60	postE-EPI	14 dpf	Epiblast	E7
MFI144_sc61	postE-EPI	14 dpf	Epiblast	E7
MFI144_sc62	postE-EPI	14 dpf	Epiblast	E7
MFI144_sc63	E-AM	14 dpf	ExE ectoderm	E7.25
MFI144_sc64	EXMC	14 dpf	Haematoendothelial progenitors	E7
MFI144_sc65	TE and derivatives	14 dpf	ExE ectoderm	E7.25
MFI144_sc66	postE-EPI	14 dpf	Epiblast	E7
MFI144_sc67	postE-EPI	14 dpf	Epiblast	E7
MFI144_sc68	postE-EPI	14 dpf	Epiblast	E7
MFI144_sc69	EXMC	14 dpf	Mixed mesoderm	E7
MFI144_sc71	TE and derivatives	14 dpf	ExE ectoderm	E7.25
MFI144_sc72	postE-EPI	14 dpf	Epiblast	E7
MFI144_sc73	postE-EPI	14 dpf	Epiblast	E7
MFI144_sc74	postE-EPI	14 dpf	Epiblast	E7.25
MFI144_sc75	TE and derivatives	14 dpf	ExE ectoderm	E6.5
MFI144_sc76	postE-EPI	14 dpf	Epiblast	E7.5
MFI144_sc77	postE-EPI	14 dpf	Epiblast	E7
MFI144_sc78	postE-EPI	14 dpf	Epiblast	E7
MFI144_sc79	EXMC	14 dpf	Mixed mesoderm	E7
MFI144_sc80	postE-EPI	14 dpf	Epiblast	E7.5
MFI144_sc81	postE-EPI	14 dpf	Epiblast	E7.5
MFI144_sc82	TE and derivatives	14 dpf	ExE ectoderm	E6.5
MFI144_sc83	postE-EPI	14 dpf	Epiblast	E7
MFI144_sc84	EXMC	14 dpf	Haematoendothelial progenitors	E7.5
MFI144_sc85	postE-EPI	14 dpf	Primitive Streak	E7
MFI144_sc86	TE and derivatives	14 dpf	ExE ectoderm	E7
MFI144_sc87	E-Gast	14 dpf	Primitive Streak	E7.25
MFI144_sc88	TE and derivatives	14 dpf	ExE ectoderm	E7.25
MFI144_sc90	TE and derivatives	14 dpf	ExE ectoderm	E7.5
MFI144_sc91	TE and derivatives	14 dpf	ExE ectoderm	E6.5
MFI144_sc92	postE-EPI	14 dpf	Epiblast	E7
MFI144_sc93	postE-EPI	14 dpf	Epiblast	E7.5
MFI144_sc94	postE-EPI	14 dpf	Epiblast	E7
MFI144_sc95	postE-EPI	14 dpf	Primitive Streak	E7
MFI144_sc96	EXMC	14 dpf	Nascent mesoderm	E7.25
MFI161_sc01	EXMC	16 dpf	Haematoendothelial progenitors	E7
MFI161_sc02	EXMC	16 dpf	Haematoendothelial progenitors	E7.5
MFI161_sc03	VE/YE	16 dpf	Nascent mesoderm	E7
MFI161_sc04	postL-EPI	16 dpf	Epiblast	E7
MFI161_sc06	EXMC	16 dpf	Mixed mesoderm	E7.5
MFI161_sc07	postL-EPI	16 dpf	Epiblast	E7
MFI161_sc09	EXMC	16 dpf	Nascent mesoderm	E7.25
MFI161_sc10	L-AM1	16 dpf	Epiblast	E7
MFI161_sc11	EXMC	16 dpf	Nascent mesoderm	E7.25
MFI161_sc12	L-Gast1	16 dpf	Epiblast	E7
MFI161_sc13	L-AM1	16 dpf	Epiblast	E7
MFI161_sc14	VE/YE	16 dpf	ExE endoderm	E7.25
MFI161_sc15	postL-EPI	16 dpf	Epiblast	E7
MFI161_sc16	postL-EPI	16 dpf	Epiblast	E7
MFI161_sc17	postL-EPI	16 dpf	Epiblast	E7
MFI161_sc18	EXMC	16 dpf	Haematoendothelial progenitors	E7.5
MFI161_sc19	VE/YE	16 dpf	ExE endoderm	E7
MFI161_sc20	E-PGC	16 dpf	Primitive Streak	E7.25
MFI161_sc21	postL-EPI	16 dpf	Epiblast	E7
MFI161_sc22	VE/YE	16 dpf	ExE endoderm	E7
MFI161_sc23	postL-EPI	16 dpf	Epiblast	E7
MFI161_sc24	L-Gast2	16 dpf	Mixed mesoderm	E7.5
MFI161_sc25	postL-EPI	16 dpf	Primitive Streak	E7.25
MFI161_sc26	EXMC	16 dpf	Haematoendothelial progenitors	E7
MFI161_sc27	VE/YE	16 dpf	Visceral endoderm	E7.25
MFI161_sc28	TE and derivatives	16 dpf	ExE ectoderm	E7.5
MFI161_sc29	postL-EPI	16 dpf	Primitive Streak	E7.25
MFI161_sc30	EXMC	16 dpf	Haematoendothelial progenitors	E7
MFI161_sc31	EXMC	16 dpf	Mixed mesoderm	E7
MFI161_sc32	L-Gast2	16 dpf	Nascent mesoderm	E7
MFI161_sc33	EXMC	16 dpf	Parietal endoderm	E7.25
MFI161_sc35	postL-EPI	16 dpf	Epiblast	E7
MFI161_sc37	postL-EPI	16 dpf	Epiblast	E7
MFI161_sc38	postL-EPI	16 dpf	Epiblast	E7
MFI161_sc39	EXMC	16 dpf	Nascent mesoderm	E7.25
MFI161_sc40	VE/YE	16 dpf	ExE endoderm	E7
MFI161_sc41	VE/YE	16 dpf	ExE endoderm	E7.25
MFI161_sc42	VE/YE	16 dpf	ExE endoderm	E7.5
MFI161_sc43	L-AM1	16 dpf	Epiblast	E7
MFI161_sc44	postL-EPI	16 dpf	Epiblast	E7.25
MFI161_sc46	L-Gast2	16 dpf	Nascent mesoderm	E7
MFI161_sc47	postL-EPI	16 dpf	Epiblast	E7
MFI161_sc48	L-Gast1	16 dpf	Epiblast	E7.25
MFI161_sc49	VE/YE	16 dpf	ExE endoderm	E7
MFI161_sc50	VE/YE	16 dpf	ExE endoderm	E7
MFI161_sc51	VE/YE	16 dpf	Nascent mesoderm	E7
MFI161_sc52	L-Gast2	16 dpf	Mixed mesoderm	E7.25
MFI161_sc53	L-Gast2	16 dpf	Primitive Streak	E7
MFI161_sc55	L-AM2	16 dpf	Mixed mesoderm	E7.25
MFI161_sc56	L-AM1	16 dpf	Epiblast	E7.25
MFI161_sc57	VE/YE	16 dpf	Epiblast	E7
MFI161_sc58	postL-EPI	16 dpf	Epiblast	E7.25
MFI161_sc59	postL-EPI	16 dpf	Epiblast	E7
MFI161_sc60	L-AM1	16 dpf	Epiblast	E7
MFI161_sc61	EXMC	16 dpf	Haematoendothelial progenitors	E7
MFI161_sc62	L-Gast2	16 dpf	Nascent mesoderm	E7.25
MFI161_sc63	EXMC	16 dpf	Mixed mesoderm	E7.25
MFI161_sc65	VE/YE	16 dpf	ExE endoderm	E6.75
MFI161_sc66	L-AM1	16 dpf	Primitive Streak	E7
MFI161_sc67	EXMC	16 dpf	Haematoendothelial progenitors	E7
MFI161_sc68	postL-EPI	16 dpf	Epiblast	E7
MFI161_sc69	postL-EPI	16 dpf	Epiblast	E7.5
MFI161_sc70	L-Gast1	16 dpf	Primitive Streak	E7
MFI161_sc71	postL-EPI	16 dpf	Epiblast	E7
MFI161_sc72	EXMC	16 dpf	Primitive Streak	E7.25
MFI161_sc73	EXMC	16 dpf	Haematoendothelial progenitors	E7
MFI161_sc74	L-AM2	16 dpf	PGC	E7.25
MFI161_sc75	L-Gast1	16 dpf	Primitive Streak	E7
MFI161_sc76	L-AM2	16 dpf	ExE endoderm	E7
MFI161_sc77	L-AM1	16 dpf	Epiblast	E7
MFI161_sc78	postL-EPI	16 dpf	Epiblast	E7.25
MFI161_sc79	VE/YE	16 dpf	ExE endoderm	E7.5
MFI161_sc80	postL-EPI	16 dpf	Epiblast	E7
MFI161_sc81	postL-EPI	16 dpf	Epiblast	E7.5
MFI161_sc82	L-AM1	16 dpf	Epiblast	E7
MFI161_sc83	EXMC	16 dpf	Haematoendothelial progenitors	E7.5
MFI161_sc84	EXMC	16 dpf	Epiblast	E7
MFI161_sc85	L-AM2	16 dpf	PGC	E7.25
MFI161_sc87	postL-EPI	16 dpf	Epiblast	E7
MFI161_sc88	EXMC	16 dpf	Nascent mesoderm	E7
MFI161_sc89	EXMC	16 dpf	Mesenchyme	E7.5
MFI161_sc90	postL-EPI	16 dpf	Epiblast	E7
MFI161_sc91	postL-EPI	16 dpf	Epiblast	E7
MFI161_sc92	postL-EPI	16 dpf	Epiblast	E7
MFI161_sc93	EXMC	16 dpf	ExE mesoderm	E7.25
MFI161_sc94	postL-EPI	16 dpf	Epiblast	E7
MFI161_sc95	L-Gast2	16 dpf	ExE mesoderm	E7.5
MFI161_sc96	EXMC	16 dpf	Nascent mesoderm	E7
MFI162_sc01	postL-EPI	16 dpf	Epiblast	E7.25
MFI162_sc03	EXMC	16 dpf	Haematoendothelial progenitors	E7
MFI162_sc04	EXMC	16 dpf	Haematoendothelial progenitors	E7.5
MFI162_sc05	E-PGC	16 dpf	Primitive Streak	E7
MFI162_sc06	TE and derivatives	16 dpf	ExE ectoderm	E7
MFI162_sc07	VE/YE	16 dpf	PGC	E7
MFI162_sc08	L-Gast2	16 dpf	Nascent mesoderm	E7
MFI162_sc09	L-Gast2	16 dpf	Nascent mesoderm	E7
MFI162_sc10	E-PGC	16 dpf	Epiblast	E7
MFI162_sc11	EXMC	16 dpf	ExE mesoderm	E7.5
MFI162_sc12	postL-EPI	16 dpf	Epiblast	E7
MFI162_sc13	EXMC	16 dpf	Haematoendothelial progenitors	E7.5
MFI162_sc14	postL-EPI	16 dpf	Epiblast	E7
MFI162_sc15	EXMC	16 dpf	Haematoendothelial progenitors	E7
MFI162_sc16	EXMC	16 dpf	Haematoendothelial progenitors	E7
MFI162_sc17	E-PGC	16 dpf	Primitive Streak	E7.5
MFI162_sc18	L-AM2	16 dpf	PGC	E7.25
MFI162_sc19	L-AM2	16 dpf	PGC	E7.25
MFI162_sc21	EXMC	16 dpf	Mixed mesoderm	E7.25
MFI162_sc22	postL-EPI	16 dpf	Epiblast	E7
MFI162_sc23	postL-EPI	16 dpf	Epiblast	E7
MFI162_sc24	EXMC	16 dpf	Haematoendothelial progenitors	E7.5
MFI162_sc25	postL-EPI	16 dpf	Primitive Streak	E7.25
MFI162_sc27	postL-EPI	16 dpf	Epiblast	E7
MFI162_sc28	L-Gast2	16 dpf	Nascent mesoderm	E7
MFI162_sc29	L-Gast1	16 dpf	Primitive Streak	E7
MFI162_sc30	postL-EPI	16 dpf	Epiblast	E7.5
MFI162_sc31	postL-EPI	16 dpf	Epiblast	E7
MFI162_sc32	postL-EPI	16 dpf	Epiblast	E7
MFI162_sc33	L-AM2	16 dpf	PGC	E7.25
MFI162_sc35	L-AM2	16 dpf	Haematoendothelial progenitors	E7
MFI162_sc36	postL-EPI	16 dpf	Primitive Streak	E7
MFI162_sc38	postL-EPI	16 dpf	Epiblast	E7.25
MFI162_sc41	EXMC	16 dpf	Haematoendothelial progenitors	E7.5
MFI162_sc42	EXMC	16 dpf	Nascent mesoderm	E7.5
MFI162_sc43	VE/YE	16 dpf	ExE endoderm	E7
MFI162_sc44	VE/YE	16 dpf	Def. endoderm	E7.25
MFI162_sc45	postL-EPI	16 dpf	Epiblast	E7
MFI162_sc46	postL-EPI	16 dpf	Epiblast	E7
MFI162_sc47	postL-EPI	16 dpf	Epiblast	E7
MFI162_sc48	EXMC	16 dpf	Haematoendothelial progenitors	E7.5
MFI162_sc49	EXMC	16 dpf	PGC	E7.25
MFI162_sc50	postL-EPI	16 dpf	Epiblast	E7
MFI162_sc51	VE/YE	16 dpf	ExE endoderm	E7.25
MFI162_sc52	L-AM2	16 dpf	ExE endoderm	E7
MFI162_sc53	VE/YE	16 dpf	ExE endoderm	E7.25
MFI162_sc54	postL-EPI	16 dpf	Epiblast	E7
MFI162_sc55	postL-EPI	16 dpf	Epiblast	E7
MFI162_sc56	L-AM2	16 dpf	ExE endoderm	E7
MFI162_sc57	VE/YE	16 dpf	ExE endoderm	E7.5
MFI162_sc58	EXMC	16 dpf	Haematoendothelial progenitors	E7.5
MFI162_sc59	EXMC	16 dpf	Mesenchyme	E7.5
MFI162_sc60	L-AM2	16 dpf	PGC	E7.25
MFI162_sc61	L-Gast2	16 dpf	Mixed mesoderm	E7.25
MFI162_sc62	EXMC	16 dpf	ExE endoderm	E7
MFI162_sc63	EXMC	16 dpf	Primitive Streak	E7
MFI162_sc64	postL-EPI	16 dpf	Epiblast	E7
MFI162_sc65	L-AM1	16 dpf	Primitive Streak	E7.25
MFI162_sc66	EXMC	16 dpf	Haematoendothelial progenitors	E7
MFI162_sc67	EXMC	16 dpf	Mixed mesoderm	E7.25
MFI162_sc68	VE/YE	16 dpf	ExE endoderm	E7.5
MFI162_sc70	E-PGC	16 dpf	Epiblast	E7
MFI162_sc71	EXMC	16 dpf	Nascent mesoderm	E7
MFI162_sc72	EXMC	16 dpf	PGC	E7.25
MFI162_sc73	L-Gast1	16 dpf	Primitive Streak	E7
MFI162_sc74	postL-EPI	16 dpf	Epiblast	E7.25
MFI162_sc75	postL-EPI	16 dpf	Epiblast	E7
MFI162_sc76	postL-EPI	16 dpf	Epiblast	E7
MFI162_sc77	L-AM1	16 dpf	Epiblast	E7
MFI162_sc78	E-PGC	16 dpf	PGC	E7.25
MFI162_sc79	postL-EPI	16 dpf	Epiblast	E7.25
MFI162_sc80	postL-EPI	16 dpf	Epiblast	E7
MFI162_sc81	EXMC	16 dpf	Mixed mesoderm	E7.25
MFI162_sc82	EXMC	16 dpf	Haematoendothelial progenitors	E7.5
MFI162_sc83	postL-EPI	16 dpf	Epiblast	E7
MFI162_sc84	postL-EPI	16 dpf	Epiblast	E7
MFI162_sc85	L-Gast1	16 dpf	Primitive Streak	E7
MFI162_sc86	postL-EPI	16 dpf	Epiblast	E7
MFI162_sc87	postL-EPI	16 dpf	Epiblast	E7
MFI162_sc88	EXMC	16 dpf	Mixed mesoderm	E7.25
MFI162_sc89	L-AM2	16 dpf	ExE endoderm	E7
MFI162_sc90	L-Gast2	16 dpf	Mixed mesoderm	E7.5
MFI162_sc92	postL-EPI	16 dpf	Epiblast	E7
MFI162_sc93	L-AM2	16 dpf	PGC	E7.25
MFI162_sc95	postL-EPI	16 dpf	Epiblast	E7
MFI162_sc96	EXMC	16 dpf	Primitive Streak	E7.5
MFI163_sc01	L-AM2	16 dpf	PGC	E7.25
MFI163_sc03	VE/YE	16 dpf	Def. endoderm	E7.5
MFI163_sc04	postL-EPI	16 dpf	Epiblast	E7
MFI163_sc06	postL-EPI	16 dpf	Epiblast	E7
MFI163_sc07	postL-EPI	16 dpf	Epiblast	E7
MFI163_sc08	L-AM2	16 dpf	ExE endoderm	E7
MFI163_sc09	E-PGC	16 dpf	Nascent mesoderm	E7
MFI163_sc10	VE/YE	16 dpf	ExE endoderm	E7.25
MFI163_sc11	L-AM2	16 dpf	ExE endoderm	E7
MFI163_sc12	L-Gast1	16 dpf	Epiblast	E7
MFI163_sc13	E-PGC	16 dpf	Nascent mesoderm	E7.25
MFI163_sc14	E-PGC	16 dpf	Nascent mesoderm	E7
MFI163_sc15	EXMC	16 dpf	Epiblast	E7
MFI163_sc16	EXMC	16 dpf	ExE endoderm	E7
MFI163_sc17	postL-EPI	16 dpf	Epiblast	E7
MFI163_sc18	EXMC	16 dpf	Haematoendothelial progenitors	E7
MFI163_sc20	postL-EPI	16 dpf	Epiblast	E7
MFI163_sc21	postL-EPI	16 dpf	Epiblast	E7.5
MFI163_sc22	L-Gast2	16 dpf	Primitive Streak	E7.5
MFI163_sc24	EXMC	16 dpf	Def. endoderm	E7.5
MFI163_sc25	postL-EPI	16 dpf	Epiblast	E7
MFI163_sc26	postL-EPI	16 dpf	Epiblast	E7
MFI163_sc27	VE/YE	16 dpf	ExE endoderm	E7
MFI163_sc28	VE/YE	16 dpf	Def. endoderm	E7.25
MFI163_sc29	L-AM2	16 dpf	PGC	E7.25
MFI163_sc30	L-Gast2	16 dpf	Haematoendothelial progenitors	E7
MFI163_sc31	L-Gast1	16 dpf	Primitive Streak	E7
MFI163_sc32	EXMC	16 dpf	Mixed mesoderm	E7.5
MFI163_sc33	L-AM1	16 dpf	Epiblast	E7
MFI163_sc35	postL-EPI	16 dpf	Epiblast	E7
MFI163_sc36	L-Gast2	16 dpf	Nascent mesoderm	E7
MFI163_sc37	L-Gast2	16 dpf	Primitive Streak	E7.25
MFI163_sc38	postL-EPI	16 dpf	Epiblast	E7
MFI163_sc39	postL-EPI	16 dpf	Epiblast	E7
MFI163_sc40	EXMC	16 dpf	Mesenchyme	E7.5
MFI163_sc41	L-Gast2	16 dpf	PGC	E7.25
MFI163_sc42	L-Gast1	16 dpf	Primitive Streak	E7
MFI163_sc44	postL-EPI	16 dpf	Epiblast	E7
MFI163_sc45	L-AM1	16 dpf	Primitive Streak	E7.25
MFI163_sc46	L-AM2	16 dpf	Mixed mesoderm	E7
MFI163_sc47	EXMC	16 dpf	Haematoendothelial progenitors	E7
MFI163_sc49	L-Gast2	16 dpf	Nascent mesoderm	E7
MFI163_sc50	VE/YE	16 dpf	ExE endoderm	E7
MFI163_sc51	VE/YE	16 dpf	ExE endoderm	E7.5
MFI163_sc52	postL-EPI	16 dpf	Epiblast	E7
MFI163_sc53	postL-EPI	16 dpf	Epiblast	E7
MFI163_sc54	VE/YE	16 dpf	ExE endoderm	E7
MFI163_sc55	postL-EPI	16 dpf	Epiblast	E7
MFI163_sc56	postL-EPI	16 dpf	Epiblast	E7
MFI163_sc57	L-AM2	16 dpf	ExE mesoderm	E7.25
MFI163_sc58	EXMC	16 dpf	Mesenchyme	E7.5
MFI163_sc61	EXMC	16 dpf	PGC	E7.25
MFI163_sc62	postL-EPI	16 dpf	Epiblast	E7
MFI163_sc63	L-Gast2	16 dpf	Haematoendothelial progenitors	E7.5
MFI163_sc64	postL-EPI	16 dpf	Epiblast	E7
MFI163_sc65	E-PGC	16 dpf	Nascent mesoderm	E7
MFI163_sc66	VE/YE	16 dpf	Visceral endoderm	E6.75
MFI163_sc67	L-Gast2	16 dpf	Nascent mesoderm	E7.5
MFI163_sc68	EXMC	16 dpf	Epiblast	E7
MFI163_sc69	EXMC	16 dpf	Nascent mesoderm	E7.25
MFI163_sc70	EXMC	16 dpf	Mixed mesoderm	E7.5
MFI163_sc71	L-Gast2	16 dpf	Nascent mesoderm	E7
MFI163_sc72	EXMC	16 dpf	Def. endoderm	E7.25
MFI163_sc73	EXMC	16 dpf	Nascent mesoderm	E7.25
MFI163_sc74	L-AM1	16 dpf	Nascent mesoderm	E7
MFI163_sc75	E-PGC	16 dpf	Primitive Streak	E7
MFI163_sc76	EXMC	16 dpf	Haematoendothelial progenitors	E7
MFI163_sc77	L-Gast2	16 dpf	Mixed mesoderm	E7.5
MFI163_sc78	E-PGC	16 dpf	Nascent mesoderm	E7
MFI163_sc79	L-AM2	16 dpf	Mixed mesoderm	E7
MFI163_sc80	L-Gast2	16 dpf	ExE mesoderm	E7.5
MFI163_sc81	EXMC	16 dpf	Haematoendothelial progenitors	E7.5
MFI163_sc82	EXMC	16 dpf	Mixed mesoderm	E7.5
MFI163_sc83	E-PGC	16 dpf	PGC	E7.25
MFI163_sc84	L-AM1	16 dpf	Primitive Streak	E7.5
MFI163_sc87	postL-EPI	16 dpf	Epiblast	E7
MFI163_sc88	postL-EPI	16 dpf	Epiblast	E7
MFI163_sc89	L-Gast2	16 dpf	Epiblast	E7
MFI163_sc90	EXMC	16 dpf	Haematoendothelial progenitors	E7
MFI163_sc91	postL-EPI	16 dpf	Epiblast	E7
MFI163_sc92	EXMC	16 dpf	Mesenchyme	E7.5
MFI163_sc93	postL-EPI	16 dpf	Epiblast	E7
MFI163_sc94	L-Gast1	16 dpf	Primitive Streak	E7
MFI163_sc95	EXMC	16 dpf	Haematoendothelial progenitors	E7
MFI163_sc96	postL-EPI	16 dpf	Epiblast	E7
MFI164_sc01	postL-EPI	16 dpf	Epiblast	E7.25
MFI164_sc04	EXMC	16 dpf	Mixed mesoderm	E7.5
MFI164_sc05	EXMC	16 dpf	Mixed mesoderm	E7.25
MFI164_sc06	E-PGC	16 dpf	Epiblast	E7
MFI164_sc07	E-PGC	16 dpf	Nascent mesoderm	E7
MFI164_sc08	L-Gast2	16 dpf	Nascent mesoderm	E7
MFI164_sc09	L-Gast1	16 dpf	Epiblast	E7
MFI164_sc12	VE/YE	16 dpf	Primitive Streak	E7
MFI164_sc13	EXMC	16 dpf	Mixed mesoderm	E7.25
MFI164_sc14	postL-EPI	16 dpf	Epiblast	E7
MFI164_sc15	L-Gast2	16 dpf	Nascent mesoderm	E7.25
MFI164_sc16	L-Gast2	16 dpf	Primitive Streak	E7
MFI164_sc17	EXMC	16 dpf	Nascent mesoderm	E7.25
MFI164_sc18	L-AM2	16 dpf	Nascent mesoderm	E7.25
MFI164_sc19	postL-EPI	16 dpf	Epiblast	E7.25
MFI164_sc20	L-AM1	16 dpf	PGC	E7.25
MFI164_sc21	VE/YE	16 dpf	ExE endoderm	E7.25
MFI164_sc22	EXMC	16 dpf	Mixed mesoderm	E7.25
MFI164_sc24	E-PGC	16 dpf	Nascent mesoderm	E7
MFI164_sc25	postL-EPI	16 dpf	Epiblast	E7
MFI164_sc27	postL-EPI	16 dpf	Epiblast	E7
MFI164_sc28	postL-EPI	16 dpf	Epiblast	E7
MFI164_sc29	postL-EPI	16 dpf	Epiblast	E7
MFI164_sc30	EXMC	16 dpf	Nascent mesoderm	E7.25
MFI164_sc31	L-Gast1	16 dpf	Primitive Streak	E7.25
MFI164_sc32	postL-EPI	16 dpf	Epiblast	E7
MFI164_sc33	EXMC	16 dpf	Mixed mesoderm	E7.25
MFI164_sc35	EXMC	16 dpf	Nascent mesoderm	E7.25
MFI164_sc37	E-PGC	16 dpf	Epiblast	E7
MFI164_sc38	postL-EPI	16 dpf	Epiblast	E7
MFI164_sc39	postL-EPI	16 dpf	Epiblast	E7.25
MFI164_sc40	L-Gast2	16 dpf	Mixed mesoderm	E7.5
MFI164_sc41	L-Gast2	16 dpf	Mixed mesoderm	E7.25
MFI164_sc42	EXMC	16 dpf	Nascent mesoderm	E7.25
MFI164_sc44	postL-EPI	16 dpf	Epiblast	E7
MFI164_sc45	postL-EPI	16 dpf	Epiblast	E7
MFI164_sc46	VE/YE	16 dpf	Nascent mesoderm	E7.25
MFI164_sc47	L-Gast2	16 dpf	Nascent mesoderm	E7
MFI164_sc48	VE/YE	16 dpf	ExE endoderm	E7
MFI164_sc49	EXMC	16 dpf	Epiblast	E7
MFI164_sc50	VE/YE	16 dpf	Nascent mesoderm	E7
MFI164_sc51	EXMC	16 dpf	Nascent mesoderm	E7.25
MFI164_sc52	L-AM2	16 dpf	ExE endoderm	E7.25
MFI164_sc53	VE/YE	16 dpf	ExE endoderm	E7
MFI164_sc54	VE/YE	16 dpf	ExE endoderm	E7
MFI164_sc55	EXMC	16 dpf	Mixed mesoderm	E7.25
MFI164_sc56	VE/YE	16 dpf	ExE endoderm	E7
MFI164_sc58	EXMC	16 dpf	Nascent mesoderm	E7.25
MFI164_sc59	postL-EPI	16 dpf	Epiblast	E7
MFI164_sc60	L-AM1	16 dpf	Epiblast	E7
MFI164_sc62	postL-EPI	16 dpf	Epiblast	E7.25
MFI164_sc63	postL-EPI	16 dpf	Epiblast	E7
MFI164_sc64	L-AM1	16 dpf	Nascent mesoderm	E7
MFI164_sc72	EXMC	16 dpf	PGC	E7.25
MFI164_sc73	postL-EPI	16 dpf	Epiblast	E7
MFI164_sc74	postL-EPI	16 dpf	Epiblast	E7
MFI164_sc75	L-AM2	16 dpf	ExE endoderm	E7
MFI164_sc76	EXMC	16 dpf	Nascent mesoderm	E7
MFI164_sc77	EXMC	16 dpf	Nascent mesoderm	E7
MFI164_sc78	L-Gast1	16 dpf	Primitive Streak	E7
MFI164_sc79	TE and derivatives	16 dpf	ExE ectoderm	E7.5
MFI164_sc80	postL-EPI	16 dpf	Epiblast	E7
MFI164_sc81	VE/YE	16 dpf	ExE endoderm	E7
MFI164_sc82	L-Gast2	16 dpf	Epiblast	E7
MFI164_sc83	EXMC	16 dpf	Nascent mesoderm	E7.25
MFI164_sc84	VE/YE	16 dpf	ExE endoderm	E6.5
MFI164_sc85	postL-EPI	16 dpf	Epiblast	E7
MFI164_sc86	L-Gast2	16 dpf	Nascent mesoderm	E7
MFI164_sc87	L-Gast2	16 dpf	PGC	E7.25
MFI164_sc88	EXMC	16 dpf	Nascent mesoderm	E7.25
MFI164_sc89	postL-EPI	16 dpf	Epiblast	E7
MFI164_sc90	E-PGC	16 dpf	Nascent mesoderm	E7
MFI164_sc92	postL-EPI	16 dpf	Epiblast	E7.25
MFI164_sc93	EXMC	16 dpf	Haematoendothelial progenitors	E7
MFI164_sc94	EXMC	16 dpf	Nascent mesoderm	E7.25
MFI164_sc95	L-AM1	16 dpf	Epiblast	E7
MFI164_sc96	L-AM2	16 dpf	ExE endoderm	E7.25
MFI171_sc01	EXMC	17 dpf	Mesenchyme	E7.5
MFI171_sc02	postL-EPI	17 dpf	Nascent mesoderm	E7
MFI171_sc03	EXMC	17 dpf	Mesenchyme	E7.5
MFI171_sc05	EXMC	17 dpf	Mixed mesoderm	E7.5
MFI171_sc06	EXMC	17 dpf	Haematoendothelial progenitors	E7.5
MFI171_sc07	EXMC	17 dpf	Haematoendothelial progenitors	E7.5
MFI171_sc08	EXMC	17 dpf	Mesenchyme	E7.5
MFI171_sc09	EXMC	17 dpf	Mesenchyme	E7.5
MFI171_sc10	EXMC	17 dpf	Mesenchyme	E7.5
MFI171_sc11	EXMC	17 dpf	Mesenchyme	E7.5
MFI171_sc12	EXMC	17 dpf	Mesenchyme	E7.5
MFI171_sc13	TE and derivatives	17 dpf	ExE ectoderm	E7.25
MFI171_sc15	EXMC	17 dpf	Mesenchyme	E7.5
MFI171_sc16	EXMC	17 dpf	Mesenchyme	E7.5
MFI171_sc17	EXMC	17 dpf	Mesenchyme	E7.5
MFI171_sc18	EXMC	17 dpf	PGC	E7.5
MFI171_sc19	EXMC	17 dpf	Mixed mesoderm	E7.5
MFI171_sc20	TE and derivatives	17 dpf	ExE ectoderm	E7.25
MFI171_sc21	EXMC	17 dpf	Mesenchyme	E7.5
MFI171_sc22	EXMC	17 dpf	Mesenchyme	E7.5
MFI171_sc23	TE and derivatives	17 dpf	ExE ectoderm	E7.25
MFI171_sc24	EXMC	17 dpf	Mesenchyme	E7.5
MFI171_sc25	TE and derivatives	17 dpf	ExE ectoderm	E7.25
MFI171_sc26	EXMC	17 dpf	Mesenchyme	E7.5
MFI171_sc27	EXMC	17 dpf	Mesenchyme	E7.5
MFI171_sc28	postL-EPI	17 dpf	Epiblast	E7
MFI171_sc29	EXMC	17 dpf	Haematoendothelial progenitors	E7
MFI171_sc30	postL-EPI	17 dpf	Nascent mesoderm	E7.25
MFI171_sc31	EXMC	17 dpf	Haematoendothelial progenitors	E7.25
MFI171_sc32	TE and derivatives	17 dpf	ExE ectoderm	E7.5
MFI171_sc33	postL-EPI	17 dpf	Epiblast	E7
MFI171_sc34	VE/YE	17 dpf	ExE endoderm	E7.25
MFI171_sc35	EXMC	17 dpf	Parietal endoderm	E7.25
MFI171_sc36	EXMC	17 dpf	Parietal endoderm	E7.25
MFI171_sc38	postL-EPI	17 dpf	Epiblast	E7.5
MFI171_sc40	EXMC	17 dpf	Mesenchyme	E7.5
MFI171_sc41	postL-EPI	17 dpf	ExE ectoderm	E7.25
MFI171_sc42	EXMC	17 dpf	Mesenchyme	E7.5
MFI171_sc43	EXMC	17 dpf	Haematoendothelial progenitors	E7.5
MFI171_sc44	TE and derivatives	17 dpf	ExE ectoderm	E7.25
MFI171_sc45	EXMC	17 dpf	Mesenchyme	E7.5
MFI171_sc46	EXMC	17 dpf	Haematoendothelial progenitors	E7.25
MFI171_sc47	EXMC	17 dpf	Mesenchyme	E7.5
MFI171_sc48	EXMC	17 dpf	Haematoendothelial progenitors	E7.5
MFI171_sc49	EXMC	17 dpf	Haematoendothelial progenitors	E7.25
MFI171_sc50	TE and derivatives	17 dpf	ExE ectoderm	E7.25
MFI171_sc51	EXMC	17 dpf	Mesenchyme	E7.5
MFI171_sc52	EXMC	17 dpf	Mesenchyme	E7.5
MFI171_sc53	EXMC	17 dpf	Haematoendothelial progenitors	E7.5
MFI171_sc54	postL-EPI	17 dpf	Gut	E7.5
MFI171_sc55	TE and derivatives	17 dpf	ExE ectoderm	E7.5
MFI171_sc57	EXMC	17 dpf	Haematoendothelial progenitors	E7
MFI171_sc58	EXMC	17 dpf	Mesenchyme	E7.5
MFI171_sc60	EXMC	17 dpf	Mesenchyme	E7.5
MFI171_sc61	EXMC	17 dpf	Parietal endoderm	E7.25
MFI171_sc62	EXMC	17 dpf	Mesenchyme	E7.5
MFI171_sc63	EXMC	17 dpf	Mesenchyme	E7.5
MFI171_sc64	EXMC	17 dpf	Mesenchyme	E7.5
MFI171_sc65	EXMC	17 dpf	Mesenchyme	E7.5
MFI171_sc66	EXMC	17 dpf	Mesenchyme	E7.5
MFI171_sc68	postL-EPI	17 dpf	Epiblast	E7.5
MFI171_sc69	VE/YE	17 dpf	ExE endoderm	E7.5
MFI171_sc70	EXMC	17 dpf	Mesenchyme	E7.5
MFI171_sc71	EXMC	17 dpf	Haematoendothelial progenitors	E7
MFI171_sc73	EXMC	17 dpf	Mixed mesoderm	E7.25
MFI171_sc74	EXMC	17 dpf	Haematoendothelial progenitors	E7
MFI171_sc75	postL-EPI	17 dpf	Epiblast	E7
MFI171_sc76	L-AM1	17 dpf	PGC	E7.25
MFI171_sc77	postL-EPI	17 dpf	Epiblast	E7.5
MFI171_sc78	EXMC	17 dpf	Mesenchyme	E7.5
MFI171_sc79	postL-EPI	17 dpf	Epiblast	E7
MFI171_sc80	EXMC	17 dpf	Parietal endoderm	E7.25
MFI171_sc81	postL-EPI	17 dpf	Primitive Streak	E7
MFI171_sc82	TE and derivatives	17 dpf	ExE ectoderm	E7.25
MFI171_sc83	EXMC	17 dpf	Haematoendothelial progenitors	E7
MFI171_sc84	VE/YE	17 dpf	ExE endoderm	E7
MFI171_sc87	EXMC	17 dpf	Haematoendothelial progenitors	E7.5
MFI171_sc88	L-AM1	17 dpf	Nascent mesoderm	E7
MFI171_sc89	postL-EPI	17 dpf	Primitive Streak	E7.25
MFI171_sc90	TE and derivatives	17 dpf	Parietal endoderm	E7.25
MFI171_sc91	postL-EPI	17 dpf	Nascent mesoderm	E7.5
MFI171_sc92	postL-EPI	17 dpf	Epiblast	E7
MFI171_sc93	EXMC	17 dpf	Mesenchyme	E7.5
MFI171_sc94	EXMC	17 dpf	Haematoendothelial progenitors	E7.5
MFI171_sc95	L-AM2	17 dpf	Haematoendothelial progenitors	E7.5
MFI171_sc96	EXMC	17 dpf	Haematoendothelial progenitors	E7.5
MFI172_sc01	EXMC	17 dpf	Mesenchyme	E7.5
MFI172_sc05	EXMC	17 dpf	Mesenchyme	E7.5
MFI172_sc06	EXMC	17 dpf	Mesenchyme	E7.5
MFI172_sc07	EXMC	17 dpf	Mesenchyme	E7.5
MFI172_sc09	EXMC	17 dpf	Haematoendothelial progenitors	E7.5
MFI172_sc10	postL-EPI	17 dpf	Epiblast	E7.25
MFI172_sc12	postL-EPI	17 dpf	Epiblast	E7
MFI172_sc13	TE and derivatives	17 dpf	ExE ectoderm	E7
MFI172_sc14	EXMC	17 dpf	Haematoendothelial progenitors	E7.5
MFI172_sc17	VE/YE	17 dpf	ExE endoderm	E6.75
MFI172_sc18	postL-EPI	17 dpf	Nascent mesoderm	E7
MFI172_sc19	postL-EPI	17 dpf	Epiblast	E7
MFI172_sc20	TE and derivatives	17 dpf	ExE ectoderm	E7.25
MFI172_sc21	postL-EPI	17 dpf	Rostral neurectoderm	E7.5
MFI172_sc22	EXMC	17 dpf	Haematoendothelial progenitors	E7
MFI172_sc24	VE/YE	17 dpf	ExE endoderm	E7
MFI172_sc27	EXMC	17 dpf	Haematoendothelial progenitors	E7
MFI172_sc28	EXMC	17 dpf	Nascent mesoderm	E7.5
MFI172_sc29	postL-EPI	17 dpf	Epiblast	E7
MFI172_sc30	L-AM1	17 dpf	Primitive Streak	E7.25
MFI172_sc31	TE and derivatives	17 dpf	ExE ectoderm	E7.5
MFI172_sc32	EXMC	17 dpf	Mesenchyme	E7.5
MFI172_sc34	EXMC	17 dpf	Haematoendothelial progenitors	E7
MFI172_sc35	postL-EPI	17 dpf	Epiblast	E7
MFI172_sc37	postL-EPI	17 dpf	Epiblast	E7
MFI172_sc38	EXMC	17 dpf	Mixed mesoderm	E7.25
MFI172_sc39	postL-EPI	17 dpf	Epiblast	E7.5
MFI172_sc40	EXMC	17 dpf	Nascent mesoderm	E7.5
MFI172_sc41	EXMC	17 dpf	Haematoendothelial progenitors	E7.5
MFI172_sc42	EXMC	17 dpf	Mesenchyme	E7.5
MFI172_sc43	EXMC	17 dpf	Haematoendothelial progenitors	E7.5
MFI172_sc44	EXMC	17 dpf	Haematoendothelial progenitors	E7.5
MFI172_sc45	EXMC	17 dpf	PGC	E7.25
MFI172_sc46	TE and derivatives	17 dpf	Parietal endoderm	E7.25
MFI172_sc47	EXMC	17 dpf	Mesenchyme	E7.5
MFI172_sc48	EXMC	17 dpf	Mesenchyme	E7.5
MFI172_sc50	EXMC	17 dpf	Mesenchyme	E7.5
MFI172_sc51	postL-EPI	17 dpf	Epiblast	E7.25
MFI172_sc54	EXMC	17 dpf	Haematoendothelial progenitors	E7
MFI172_sc56	EXMC	17 dpf	Parietal endoderm	E7.5
MFI172_sc59	postL-EPI	17 dpf	Epiblast	E7.25
MFI172_sc60	postL-EPI	17 dpf	Epiblast	E7.5
MFI172_sc61	EXMC	17 dpf	Haematoendothelial progenitors	E7
MFI172_sc62	EXMC	17 dpf	Haematoendothelial progenitors	E7.5
MFI172_sc63	postL-EPI	17 dpf	Epiblast	E7.5
MFI172_sc65	EXMC	17 dpf	Mesenchyme	E7.5
MFI172_sc66	L-AM1	17 dpf	Nascent mesoderm	E7.25
MFI172_sc67	EXMC	17 dpf	Haematoendothelial progenitors	E7.5
MFI172_sc68	VE/YE	17 dpf	ExE endoderm	E7
MFI172_sc69	EXMC	17 dpf	Nascent mesoderm	E7.5
MFI172_sc70	postL-EPI	17 dpf	Epiblast	E7.5
MFI172_sc72	EXMC	17 dpf	Nascent mesoderm	E7.5
MFI172_sc74	EXMC	17 dpf	Haematoendothelial progenitors	E7
MFI172_sc76	TE and derivatives	17 dpf	ExE ectoderm	E7.25
MFI172_sc79	EXMC	17 dpf	Haematoendothelial progenitors	E7.5
MFI172_sc83	EXMC	17 dpf	Mixed mesoderm	E7.5
MFI172_sc84	EXMC	17 dpf	Mixed mesoderm	E7.25
MFI172_sc85	EXMC	17 dpf	Mesenchyme	E7.5
MFI172_sc88	L-Gast2	17 dpf	ExE mesoderm	E7.5
MFI172_sc91	EXMC	17 dpf	Nascent mesoderm	E7
MFI172_sc92	postL-EPI	17 dpf	Primitive Streak	E7
MFI172_sc93	EXMC	17 dpf	Haematoendothelial progenitors	E7.25
MFI172_sc94	EXMC	17 dpf	Haematoendothelial progenitors	E7
MFI172_sc95	TE and derivatives	17 dpf	ExE ectoderm	E7.5
MFI173_sc01	EXMC	17 dpf	Haematoendothelial progenitors	E7
MFI173_sc03	EXMC	17 dpf	Mesenchyme	E7.5
MFI173_sc04	EXMC	17 dpf	Mesenchyme	E7.5
MFI173_sc05	TE and derivatives	17 dpf	ExE ectoderm	E7.25
MFI173_sc07	VE/YE	17 dpf	ExE endoderm	E7
MFI173_sc08	VE/YE	17 dpf	ExE endoderm	E7
MFI173_sc10	EXMC	17 dpf	Haematoendothelial progenitors	E7.5
MFI173_sc11	TE and derivatives	17 dpf	ExE ectoderm	E7.25
MFI173_sc12	EXMC	17 dpf	Mesenchyme	E7.5
MFI173_sc14	VE/YE	17 dpf	Visceral endoderm	E7.25
MFI173_sc15	TE and derivatives	17 dpf	ExE ectoderm	E7.5
MFI173_sc16	EXMC	17 dpf	Mesenchyme	E7.5
MFI173_sc17	L-AM2	17 dpf	Mesenchyme	E7.25
MFI173_sc20	EXMC	17 dpf	Mesenchyme	E7.5
MFI173_sc21	EXMC	17 dpf	Haematoendothelial progenitors	E7.5
MFI173_sc22	EXMC	17 dpf	ExE mesoderm	E7.25
MFI173_sc24	EXMC	17 dpf	Haematoendothelial progenitors	E7.5
MFI173_sc25	VE/YE	17 dpf	ExE endoderm	E7.25
MFI173_sc26	EXMC	17 dpf	Haematoendothelial progenitors	E7.5
MFI173_sc27	EXMC	17 dpf	Haematoendothelial progenitors	E7.5
MFI173_sc28	EXMC	17 dpf	Mesenchyme	E7.5
MFI173_sc29	EXMC	17 dpf	Haematoendothelial progenitors	E7.5
MFI173_sc30	EXMC	17 dpf	Haematoendothelial progenitors	E7.5
MFI173_sc31	EXMC	17 dpf	Haematoendothelial progenitors	E7.25
MFI173_sc32	EXMC	17 dpf	Haematoendothelial progenitors	E7.5
MFI173_sc33	TE and derivatives	17 dpf	ExE ectoderm	E7.25
MFI173_sc34	EXMC	17 dpf	Nascent mesoderm	E7
MFI173_sc35	EXMC	17 dpf	Haematoendothelial progenitors	E7.5
MFI173_sc36	EXMC	17 dpf	Mesenchyme	E7.5
MFI173_sc37	EXMC	17 dpf	Haematoendothelial progenitors	E7.5
MFI173_sc38	postL-EPI	17 dpf	Epiblast	E7
MFI173_sc39	EXMC	17 dpf	Mesenchyme	E7.5
MFI173_sc40	EXMC	17 dpf	Mesenchyme	E7.5
MFI173_sc41	EXMC	17 dpf	Mesenchyme	E7.5
MFI173_sc43	EXMC	17 dpf	Haematoendothelial progenitors	E7.5
MFI173_sc44	EXMC	17 dpf	Haematoendothelial progenitors	E7.5
MFI173_sc45	EXMC	17 dpf	Mesenchyme	E7.5
MFI173_sc46	EXMC	17 dpf	Nascent mesoderm	E7.5
MFI173_sc47	EXMC	17 dpf	Haematoendothelial progenitors	E7
MFI173_sc48	EXMC	17 dpf	Mesenchyme	E7.5
MFI173_sc49	EXMC	17 dpf	Mixed mesoderm	E7.5
MFI173_sc50	VE/YE	17 dpf	ExE endoderm	E6.75
MFI173_sc51	EXMC	17 dpf	Haematoendothelial progenitors	E7.5
MFI173_sc52	EXMC	17 dpf	Haematoendothelial progenitors	E7
MFI173_sc54	EXMC	17 dpf	Mesenchyme	E7.5
MFI173_sc56	EXMC	17 dpf	Mesenchyme	E7.5
MFI173_sc57	EXMC	17 dpf	Mesenchyme	E7.5
MFI173_sc58	EXMC	17 dpf	Mesenchyme	E7.5
MFI173_sc59	EXMC	17 dpf	Haematoendothelial progenitors	E7.5
MFI173_sc60	EXMC	17 dpf	Nascent mesoderm	E7
MFI173_sc61	EXMC	17 dpf	Mesenchyme	E7.5
MFI173_sc62	EXMC	17 dpf	Haematoendothelial progenitors	E7
MFI173_sc63	EXMC	17 dpf	Haematoendothelial progenitors	E7.5
MFI173_sc65	EXMC	17 dpf	Haematoendothelial progenitors	E7
MFI173_sc66	EXMC	17 dpf	Mesenchyme	E7.5
MFI173_sc67	EXMC	17 dpf	Haematoendothelial progenitors	E7.5
MFI173_sc68	EXMC	17 dpf	Parietal endoderm	E7.25
MFI173_sc69	EXMC	17 dpf	Haematoendothelial progenitors	E7
MFI173_sc70	postL-EPI	17 dpf	Epiblast	E7
MFI173_sc71	EXMC	17 dpf	Haematoendothelial progenitors	E7.5
MFI173_sc72	EXMC	17 dpf	Mesenchyme	E7.5
MFI173_sc73	EXMC	17 dpf	Mesenchyme	E7.5
MFI173_sc74	EXMC	17 dpf	Haematoendothelial progenitors	E7.5
MFI173_sc75	EXMC	17 dpf	Haematoendothelial progenitors	E7.5
MFI173_sc76	EXMC	17 dpf	Mesenchyme	E7.5
MFI173_sc77	EXMC	17 dpf	Mesenchyme	E7.5
MFI173_sc78	VE/YE	17 dpf	PGC	E7.25
MFI173_sc79	EXMC	17 dpf	Haematoendothelial progenitors	E7.5
MFI173_sc80	EXMC	17 dpf	Mesenchyme	E7.5
MFI173_sc81	EXMC	17 dpf	Haematoendothelial progenitors	E7.5
MFI173_sc83	TE and derivatives	17 dpf	ExE ectoderm	E7.25
MFI173_sc84	EXMC	17 dpf	Haematoendothelial progenitors	E7.5
MFI173_sc86	EXMC	17 dpf	Mesenchyme	E7.5
MFI173_sc87	VE/YE	17 dpf	Nascent mesoderm	E7
MFI173_sc89	postL-EPI	17 dpf	Epiblast	E7.5
MFI173_sc90	EXMC	17 dpf	Haematoendothelial progenitors	E7.5
MFI173_sc91	EXMC	17 dpf	Mesenchyme	E7.5
MFI173_sc92	EXMC	17 dpf	Mesenchyme	E7.25
MFI173_sc93	EXMC	17 dpf	Mesenchyme	E7.5
MFI173_sc96	EXMC	17 dpf	Mesenchyme	E7.5
