# Supplementary material for: High-resolution transcriptional and morphogenetic profiling of cells from micropatterned human ESC gastruloid cultures
Source: eLife journal article supplement (doi:10.7554/elife.59445), 2020-11-18
Supplement: supp [file elife-59445-supp-v1.zip › elife_poa_e59445_Source_data_5.xlsx]

## Sheet: Reseed.Metadata
Reseed cells metadata
		Prediction score calculated using the 7 gastruloid clusters as reference
Cell ID	Cluster ID	Prediction score for gastruloid Ectoderm	Prediction score for gastruloid EPI-like	Prediction score for gastruloid Mesoderm-1	Prediction score for gastruloid Mesoderm-2	Prediction score for gastruloid Endoderm	Prediction score for gastruloid hPGCLC	Prediction score for gastruloid ExE-like
AAACGGGAGAGACTTA_3	ExE-like	0.0367905	0	0	0.0173202	0	0	0.945889
AAACGGGTCCGCGCAA_3	ExE-like	0	0	0	0	0	0	1
AAACGGGTCTGTTTGT_3	Ectoderm	0.714905	0	0	0	0	0	0.285095
AAAGATGAGACTGTAA_3	ExE-like	0	0.376436	0.0912027	0	0	0	0.532361
AAAGCAAAGTGACTCT_3	ExE-like	0.00326898	0	0	0	0	0	0.996731
AAATGCCAGGTGATAT_3	Ectoderm	0.885685	0.0176361	0.068875	0.0167223	0	0	0.0110819
AACACGTCACCGATAT_3	EPI-like	0.019107	0.584289	0.341995	0.0541975	0	0	0.000412073
AACACGTCAGCTGTGC_3	Ectoderm	0.913357	0	0.00279376	0	0	0	0.0838488
AACACGTGTGACTACT_3	Endoderm	0	0	0	0	1	0	0
AACCATGAGATCCCAT_3	Mesoderm-2	0	0	0	1	0	0	0
AACCGCGGTGTGGTTT_3	Mesoderm-2	0	0	0	1	0	0	0
AACCGCGTCAACCATG_3	ExE-like	0	0	0	0	0	0	1
AACTCAGAGCTGTCTA_3	EPI-like	0.00382433	0.633886	0.353083	0.0041124	0	0	0.00509411
AACTCAGGTCTTTCAT_3	Mesoderm-2	0	0	0.261625	0.738375	0	0	0
AACTCCCGTCTGCGGT_3	ExE-like	0	0	0	0	0	0	1
AACTCTTGTAGATTAG_3	ExE-like	0.0389079	0.140751	0.0132619	0.165808	0.0129692	0	0.628303
AACTGGTAGAAGGCCT_3	ExE-like	0	0	0	0	0	0	1
AACTGGTGTCTGCGGT_3	Mesoderm-2	0	0	0.383028	0.616972	0	0	0
AACTGGTGTTCAACCA_3	ExE-like	0.337946	0	0	0	0	0	0.662054
AACTTTCAGATGGGTC_3	ExE-like	0	0	0	0	0	0	1
AAGACCTAGAGTACAT_3	Ectoderm	0.9979	0	0	0	0	0	0.00210019
AAGACCTGTTACCAGT_3	Mesoderm-1	0.0258012	0.166752	0.60329	0.115545	0	0.088611	0
AAGCCGCGTTGTACAC_3	EPI-like	0	0.791703	0.208297	0	0	0	0
AAGCCGCTCGGTCTAA_3	Ectoderm	0.991951	0	0.00797278	0	7.64191e-05	0	0
AAGGAGCAGATCCTGT_3	Endoderm	0	0	0	0	1	0	0
AAGGCAGAGACTACAA_3	hPGCLC	0	0	0	0	0.197307	0.802693	0
AAGGCAGCACTCGACG_3	ExE-like	0	0	0	0	0	0	1
AAGGTTCAGGGTCGAT_3	ExE-like	0	0	0	0	0	0	1
AAGGTTCCAAAGAATC_3	ExE-like	0.0156818	0	0	0	0	0	0.984318
AATCCAGAGCTGAACG_3	Mesoderm-2	0	0	0	1	0	0	0
ACACCAATCATAACCG_3	Ectoderm	1	0	0	0	0	0	0
ACACCGGTCACATACG_3	ExE-like	0	0	0	0	0	0	1
ACAGCCGGTATAGTAG_3	Mesoderm-2	0	0	0.334351	0.665649	0	0	0
ACAGCTATCCGAGCCA_3	ExE-like	0	0	0	0	0	0	1
ACATACGAGCCACTAT_3	ExE-like	0.482211	0	0	0	0	0	0.517789
ACATACGAGTCGATAA_3	Ectoderm	0.970045	0.01426	0.0132158	0.000307938	0	0	0.00217097
ACATACGCAGGGTTAG_3	ExE-like	0.469738	0	0	0	0	0.00232179	0.52794
ACATACGTCAGTCCCT_3	hPGCLC	0	0	0	0	0	1	0
ACATCAGGTGTGTGCC_3	ExE-like	0	0	0	0	0	0	1
ACATGGTAGGGTGTTG_3	ExE-like	0.309307	0.0656483	0.0353958	0.143902	0.0093314	0	0.436416
ACATGGTCACAGACAG_3	Mesoderm-2	0	0.00102658	0.18426	0.814714	0	0	0
ACATGGTCAGTGGAGT_3	ExE-like	0	0	0	0	0	0	1
ACATGGTTCTCTGTCG_3	ExE-like	0	0	0	0	0	0	1
ACCAGTATCTGGTTCC_3	Mesoderm-2	0.0147633	0	0	0.960138	0.00270994	0	0.022389
ACCCACTCAATCCGAT_3	ExE-like	0	0	0	0	0	0	1
ACGAGGAAGGATGTAT_3	ExE-like	0	0	0	0	0	0	1
ACGATGTAGGTGGGTT_3	Mesoderm-2	0	0	0	1	0	0	0
ACGATGTGTCTCTTAT_3	Mesoderm-2	0	0	0	0.98797	0.00990094	0	0.00212867
ACGCAGCGTGTAAGTA_3	ExE-like	0	0	0	0	0	0	1
ACGCCGACACTCAGGC_3	Ectoderm	0.924837	0	0	0	0	0	0.0751633
ACGCCGAGTTTGGCGC_3	Ectoderm	0.842297	0	0	0	0	0	0.157703
ACGGAGACAGCTGTAT_3	ExE-like	0	0	0	0	0	0	1
ACGGCCATCATGGTCA_3	ExE-like	0.00205113	0	0	0	0	0	0.997949
ACTATCTGTAAGTAGT_3	Mesoderm-1	0.0226075	0.118559	0.693888	0.112309	0	0.0526366	0
ACTGAACAGCCTCGTG_3	ExE-like	0	0	0	0	0	0	1
ACTGAACTCGTCACGG_3	ExE-like	0.16147	0	0	0	0	0	0.83853
ACTGAGTAGCGAAGGG_3	ExE-like	0	0	0	0	0	0	1
ACTGAGTGTCTGATCA_3	ExE-like	0	0	0	0	0	0	1
ACTGATGTCTGGGCCA_3	Mesoderm-1	0	0.261104	0.738896	0	0	0	0
ACTTACTAGAGGACGG_3	ExE-like	0	0	0	0	0	0	1
ACTTACTGTCACAAGG_3	Ectoderm	1	0	0	0	0	0	0
AGAATAGAGCTGTTCA_3	Ectoderm	0.993385	0.00661489	0	0	0	0	0
AGAGCTTTCCTTGACC_3	ExE-like	0	0	0	0	0	0	1
AGAGTGGCAAGGACAC_3	ExE-like	0.386642	0	0	0	0	0	0.613358
AGATCTGCACAGGTTT_3	Mesoderm-1	0.0302831	0.153679	0.74652	0.0284722	0	0.0410463	0
AGATCTGGTCAAAGAT_3	ExE-like	0.0220762	0	0	0	0	0	0.977924
AGATTGCAGAGTTGGC_3	hPGCLC	0	0	0	0	0	1	0
AGATTGCAGGCAATTA_3	ExE-like	0	0	0.00357162	0.0170921	3.62814e-05	0	0.9793
AGATTGCCAAAGAATC_3	Mesoderm-2	0	0.000821415	0	0.878141	0.00590629	0	0.115131
AGATTGCCAGCTCGAC_3	Mesoderm-2	0	0	0	1	0	0	0
AGCATACGTGGTGTAG_3	Endoderm	0	0	0	0	1	0	0
AGCCTAACACTGTCGG_3	ExE-like	0	0	0	0	0	0	1
AGCCTAAGTTAAGATG_3	ExE-like	0	0.00619836	0	0	0	0	0.993802
AGCGGTCAGTAGATGT_3	Mesoderm-2	0	0	0	1	0	0	0
AGCGTATTCGCGTTTC_3	Mesoderm-2	0	0	0	1	0	0	0
AGCTCCTCATCCCATC_3	Mesoderm-2	0	0	0.183172	0.816828	0	0	0
AGCTCTCAGGACGAAA_3	Mesoderm-2	0	0	0	1	0	0	0
AGCTCTCAGGCTACGA_3	ExE-like	0.00733722	0	0	0	0	0	0.992663
AGCTCTCCATTACGAC_3	Mesoderm-2	0	0	0	1	0	0	0
AGCTCTCGTCGTCTTC_3	Mesoderm-2	0.0123287	0.102634	0.34658	0.477842	0	0.0606167	0
AGCTTGACAAGCCCAC_3	ExE-like	0.0565251	0	0	0	0	0	0.943475
AGCTTGAGTTATCCGA_3	Ectoderm	0.866355	0	0	0	0	0	0.133645
AGGTCATCAATGTTGC_3	Mesoderm-1	0	0.118802	0.874862	0.00633599	0	0	0
AGGTCATTCCTATGTT_3	Ectoderm	0.524769	0	0	0.00667912	0	0	0.468551
AGGTCCGGTGGTGTAG_3	Endoderm	0	0	0	0	0.962523	0.0374773	0
AGTAGTCAGTCATGCT_3	ExE-like	0.0618537	0	0.000505119	0.00585038	0.000481055	0	0.93131
AGTAGTCGTACCATCA_3	ExE-like	0	0	0	0	0	0	1
AGTGAGGCATGGATGG_3	Ectoderm	0.893861	0.0575812	0.0189291	0	0.00528852	0.000666953	0.023673
AGTGGGACATCACAAC_3	ExE-like	0	0	0	0	0	0	1
AGTGGGACATGCAATC_3	Mesoderm-1	0.0282648	0.204305	0.674325	0.0306187	0	0.0624869	0
AGTGTCACAAATCCGT_3	ExE-like	0	0	0	0	0	0	1
AGTGTCACAGCTGTTA_3	EPI-like	0	0.774468	0.211169	0	0	0	0.014363
AGTGTCATCTCGCATC_3	ExE-like	0.131694	0	0	0	0	0	0.868306
AGTTGGTGTCTGGAGA_3	Mesoderm-1	0.0245895	0.179836	0.670997	0.0309745	0	0.0936031	0
AGTTGGTGTGCAACTT_3	Ectoderm	0.6941	0	0	0	0	0	0.3059
ATAACGCAGTGTACGG_3	ExE-like	0.0232672	0	0	0	0	0	0.976733
ATAACGCCATTGGCGC_3	ExE-like	0.0448244	0	0	0	0	0	0.955176
ATAAGAGCACGGTAAG_3	ExE-like	0.451324	0	0	0	0	0	0.548676
ATAGACCAGCGATAGC_3	Mesoderm-2	0	0	0.0324562	0.967544	0	0	0
ATCATGGTCACAGGCC_3	ExE-like	0	0	0	0	0	0	1
ATCCACCTCTTGGGTA_3	Ectoderm	0.916787	0	0	0	0	0	0.0832133
ATCCGAAAGGAGCGTT_3	ExE-like	0	0	0	0	0	0	1
ATCTGCCGTCCGTGAC_3	Mesoderm-2	0.107648	0.0390998	0.191887	0.648309	0	0	0.0130557
ATGAGGGTCTGCGTAA_3	ExE-like	0.359643	0	0	0	0	0	0.640357
ATGCGATGTTCTGAAC_3	Ectoderm	0.66476	0	0	0	0	0	0.33524
ATGGGAGCAAACCCAT_3	hPGCLC	0	0	0	0	0	1	0
ATGGGAGTCCATGAGT_3	ExE-like	0	0	0	0	0	0	1
ATTACTCAGTAGGTGC_3	Mesoderm-2	0	0	0	1	0	0	0
ATTACTCCACTTGGAT_3	ExE-like	0.0424534	0	0	0.0193656	0	0	0.938181
ATTGGTGGTGGGTCAA_3	Ectoderm	1	0	0	0	0	0	0
ATTGGTGTCTGTGCAA_3	Mesoderm-2	0	0	0	1	0	0	0
ATTTCTGAGCCGTCGT_3	hPGCLC	0	0	0	0	0	1	0
ATTTCTGGTAACGTTC_3	EPI-like	0	0.987362	0.0126381	0	0	0	0
CAACTAGAGGCATGTG_3	Ectoderm	0.429398	0.237167	0.333435	0	0	0	0
CAACTAGGTCGAACAG_3	Ectoderm	0.636079	0	0	0	0	0	0.363921
CAACTAGTCTTGGGTA_3	Mesoderm-2	0	0	0	1	0	0	0
CAAGAAACAACTGGCC_3	ExE-like	0.00573822	0	0	0	0	0	0.994262
CAAGATCGTAAGAGGA_3	hPGCLC	0	0	0	0	0	1	0
CAAGATCGTCAGGACA_3	ExE-like	0	0	0	0	0	0	1
CAAGATCTCGGAGGTA_3	Ectoderm	0.826393	0	0	0	0	0	0.173607
CAAGGCCTCAAGGCTT_3	EPI-like	0	0.727905	0.272095	0	0	0	0
CACAAACTCTAGAGTC_3	Endoderm	0	0	0	0	0.647656	0.352344	0
CACACAATCGTAGGTT_3	ExE-like	0.018899	0	0	0	0	0	0.981101
CACACCTAGTTTGCGT_3	ExE-like	0	0	0	0	0	0	1
CACAGGCAGACCTAGG_3	ExE-like	0.0380038	0	0	0.00177919	0	0	0.960217
CACAGTATCCACGAAT_3	Ectoderm	0.967736	0	0	0	0	0	0.0322644
CACATAGGTAGAGTGC_3	ExE-like	0.298259	0	0	0	0	0	0.701741
CACATAGGTGTTCGAT_3	Endoderm	0	0	0	0	1	0	0
CACATAGGTTCTGGTA_3	ExE-like	0.455253	0.0256812	0.0385536	0.000665879	0.00393378	0	0.475913
CACATTTGTAAAGTCA_3	ExE-like	0	0	0	0.0176453	0	0	0.982355
CACATTTTCAGAGCTT_3	Ectoderm	0.837676	0	0	0	0	0	0.162324
CACATTTTCTCTAGGA_3	hPGCLC	0	0.0035056	0.0173588	0.000358792	0.0545	0.924277	0
CACCACTCACTGCCAG_3	hPGCLC	0	0	0	0	0	1	0
CACTCCACATTGGCGC_3	ExE-like	0.0733185	0	0	0.0482879	0.00194908	0	0.876444
CAGATCAAGATGCGAC_3	Mesoderm-2	0	0	0	1	0	0	0
CAGATCAGTGTAAGTA_3	ExE-like	0	0	0	0	0	0	1
CAGCGACCATATGCTG_3	ExE-like	0	0	0	0	0	0	1
CAGCGACTCTTGACGA_3	ExE-like	0.00206926	0	0	0	0	0	0.997931
CAGCTAATCCAGTATG_3	hPGCLC	0	0	0	0	0	1	0
CAGCTAATCGACGGAA_3	EPI-like	0.040303	0.945513	0.0141845	0	0	0	0
CAGTCCTCATTTCACT_3	ExE-like	0	0.0074158	0	0	0	0	0.992584
CAGTCCTTCCCAACGG_3	ExE-like	0.219296	0	0.0154532	0.0439821	0.0383871	0	0.682882
CATATGGAGAATCTCC_3	ExE-like	0.00224341	0	0	0	0	0	0.997757
CATATGGGTAAGTAGT_3	Ectoderm	1	0	0	0	0	0	0
CATATTCAGTCCGGTC_3	Mesoderm-2	0.0196661	0	0	0.913037	0.0220834	0	0.0452137
CATCAGACACCCATTC_3	ExE-like	0.277492	0	0	0	0	0	0.722508
CATCCACGTGCGAAAC_3	Mesoderm-2	0	0	0.0464693	0.953531	0	0	0
CATTATCCATAGAAAC_3	Ectoderm	0.99771	0	0	0	0	0	0.00228965
CATTATCGTTGACGTT_3	Ectoderm	1	0	0	0	0	0	0
CATTCGCCATAAGACA_3	Ectoderm	0.997819	0	0.000328106	0.00157266	0.000279746	0	0
CCACCTATCTTGCATT_3	Ectoderm	0.962446	0	0	0	0	0	0.037554
CCACGGAAGGCGCTCT_3	Ectoderm	1	0	0	0	0	0	0
CCACGGACATTAACCG_3	Mesoderm-2	0	0	0	1	0	0	0
CCACGGATCTCTTGAT_3	Ectoderm	0.993797	0	0	0	0	0	0.00620255
CCAGCGAAGTGCGTGA_3	Ectoderm	0.995344	0	0	0	0	0	0.00465614
CCAGCGAGTGAGCGAT_3	Ectoderm	1	0	0	0	0	0	0
CCATGTCTCTTTACGT_3	ExE-like	0	0	0	0	0	0	1
CCCAATCTCAGGTTCA_3	ExE-like	0.0231671	0	0	0	0	0	0.976833
CCCTCCTAGGCTCTTA_3	ExE-like	0	0	0	0	0	0	1
CCGGGATGTGTTGGGA_3	ExE-like	0.0175021	0	0	0.207045	0	0	0.775453
CCGGTAGAGGACATTA_3	Mesoderm-2	0	0	0.174892	0.825108	0	0	0
CCGGTAGGTATCTGCA_3	EPI-like	0.401532	0.47403	0.0485118	0	0	0	0.0759268
CCGGTAGGTCTAAACC_3	Ectoderm	0.987373	0.00796062	0.00466594	0	0	0	0
CCGGTAGTCAGGCGAA_3	ExE-like	0.0473097	0	0.00904962	0.0478164	3.58661e-05	0	0.895788
CCGTGGACAAGACACG_3	Endoderm	0	0	0	0	1	0	0
CCGTTCAGTACCGTAT_3	Ectoderm	0.987769	0	0	0	0	0	0.0122311
CCGTTCATCCCTAACC_3	Ectoderm	0.551127	0	0	0	0	0	0.448873
CCTAAAGGTAGGGACT_3	Mesoderm-2	0.242469	0	0.0147408	0.65609	0.0535778	0	0.0331218
CCTACACCAGTACACT_3	hPGCLC	0.0640098	0.0143865	0.00857934	0	0.405314	0.507711	0
CCTAGCTCAGCTCCGA_3	Mesoderm-2	0.0377289	0	0	0.946375	0.00984923	0	0.00604733
CCTAGCTGTGATGCCC_3	Mesoderm-2	0	0	0	1	0	0	0
CCTATTAAGCCACTAT_3	Endoderm	0	0	0	0	0.96029	0.0397096	0
CCTATTACAAGCCCAC_3	Mesoderm-2	0	0	0.0216809	0.978319	0	0	0
CCTATTACAGCCTGTG_3	Ectoderm	0.989082	0	0	0	0	0	0.0109183
CCTATTACAGTATGCT_3	Ectoderm	1	0	0	0	0	0	0
CCTCAGTGTTGACGTT_3	ExE-like	0	0	0	0	0	0	1
CCTCTGAAGGAATCGC_3	ExE-like	0.00264306	0	0	0	0	0	0.997357
CCTTCGAAGAGATGAG_3	Mesoderm-2	0	0	0	0.981872	0.0181276	0	0
CCTTCGAGTAGCAAAT_3	Mesoderm-2	0	0	0	1	0	0	0
CCTTCGAGTCTTGTCC_3	Ectoderm	1	0	0	0	0	0	0
CCTTCGAGTTTCGCTC_3	hPGCLC	0	0	0	0	0	1	0
CCTTTCTCACTAAGTC_3	Ectoderm	0.739166	0.0288288	0.0590973	0.00582312	0.00898979	0.00121558	0.156879
CGAACATCACTCGACG_3	ExE-like	0	0	0	0	0	0	1
CGAACATGTCGACTGC_3	ExE-like	0.0883761	0	0	0	0	0	0.911624
CGAATGTCATGTCCTC_3	ExE-like	0	0	0	0	0	0	1
CGACTTCGTCCTGCTT_3	ExE-like	0.00293985	0	0	0	0	0	0.99706
CGAGAAGAGCTCTCGG_3	Ectoderm	0.507728	0	0	0	0	0	0.492272
CGAGCCATCACATAGC_3	ExE-like	0	0	0	0.459613	0.00498465	0	0.535402
CGATCGGTCCTCATTA_3	ExE-like	0.00295608	0	0	0	0	0	0.997044
CGATGTATCGATGAGG_3	ExE-like	0	0	0	0	0	0	1
CGATTGACACAAGTAA_3	ExE-like	0	0	0	0	0	0	1
CGATTGATCCAAGTAC_3	ExE-like	0.0675345	0	0	0	0	0	0.932465
CGCCAAGTCCTAGTGA_3	Ectoderm	0.968853	0	0	0	0	0	0.0311473
CGCGTTTAGCACCGCT_3	Mesoderm-2	0.0800159	0	0.00782921	0.869291	0.00192316	0	0.040941
CGCGTTTAGCTTCGCG_3	hPGCLC	0	0	0	0	0	1	0
CGCTTCACATAGACTC_3	ExE-like	0.00357583	0	0	0	0	0	0.996424
CGCTTCATCGCCAAAT_3	ExE-like	0	0	0	0	0	0	1
CGGACACGTGTAAGTA_3	Ectoderm	0.866471	0.11013	0.0233983	0	0	0	0
CGGACACTCTCTAAGG_3	ExE-like	0	0	0	0	0	0	1
CGGACGTAGGGCTCTC_3	Endoderm	0	0	0	0	0.968864	0.0311355	0
CGGACTGAGGCTCTTA_3	ExE-like	0	0	0	0	0	0	1
CGGACTGCATTAGCCA_3	ExE-like	0	0	0	0	0	0	1
CGGAGCTCATACTACG_3	Mesoderm-2	0.175563	0	0	0.741268	0	0	0.0831693
CGGAGTCGTTACGACT_3	Ectoderm	0.936492	0.00953625	0.0230572	0	0.00784939	0.00106485	0.0220004
CGGAGTCTCGGAAATA_3	ExE-like	0	0	0	0	0	0	1
CGGTTAAAGGTGACCA_3	Ectoderm	0.906121	0	0	0	0.000933552	0	0.0929452
CGTAGCGAGGTGATTA_3	Mesoderm-2	0.0804575	0.00510017	0	0.873082	0	0	0.0413602
CGTAGCGGTAGCTCCG_3	ExE-like	0.245477	0	0	0	0.00562492	0	0.748898
CGTAGCGTCTCACATT_3	Ectoderm	0.412322	0.341993	0.10807	0.123458	0.00264008	0	0.011516
CGTCACTGTTAAAGTG_3	Ectoderm	0.847258	0.0420743	0.0513807	0.0433744	0	0	0.0159123
CGTCTACAGTGCAAGC_3	ExE-like	0	0	0	0	0	0	1
CGTGAGCGTAGATTAG_3	hPGCLC	0	0	0	0	0	1	0
CGTTCTGAGCGAGAAA_3	ExE-like	0.286809	0	0	0	0	0.00220667	0.710984
CGTTCTGCAGCTCGAC_3	ExE-like	0	0	0	0	0	0	1
CGTTGGGTCTTCATGT_3	ExE-like	0.0802877	0	0	0.0226891	0.000151822	0	0.896871
CTAACTTAGTACGACG_3	Mesoderm-2	0.0528158	0	0	0.720135	0.0209349	0	0.206114
CTAATGGAGATGTGGC_3	ExE-like	0.29135	0	0	0	0.00157502	0	0.707075
CTAATGGGTAATAGCA_3	ExE-like	0.22257	0	0	0	0	0	0.77743
CTACACCGTCGAATCT_3	Mesoderm-2	0	0	0	1	0	0	0
CTACACCTCCACGCAG_3	Mesoderm-2	0.0172796	0	0.0539647	0.837179	0.0851455	0.00643148	0
CTACATTCACGGCGTT_3	ExE-like	0	0	0	0	0	0	1
CTACGTCTCGTTTGCC_3	hPGCLC	0	0	0	0	0	1	0
CTAGAGTCATCGGTTA_3	Mesoderm-2	0	0	0	1	0	0	0
CTAGTGAGTCAGCTAT_3	ExE-like	0	0	0	0	0	0	1
CTCAGAAGTTGACGTT_3	ExE-like	0	0	0	0	0	0.0465068	0.953493
CTCCTAGTCGAGAACG_3	hPGCLC	0	0	0	0	0	1	0
CTCGAGGGTACATGTC_3	Mesoderm-2	0	0	0.0624117	0.937588	0	0	0
CTCGAGGGTCACTGGC_3	Endoderm	0	0	0	0	0.988218	0.0117819	0
CTCGAGGGTTATCACG_3	ExE-like	0	0	0	0	0	0	1
CTCGGAGGTGTCGCTG_3	ExE-like	0	0	0	0	0	0	1
CTCTACGGTGATAAGT_3	ExE-like	0	0	0	0	0	0	1
CTCTGGTCAGGCAGTA_3	Mesoderm-2	0	0	0	1	0	0	0
CTGAAACTCTGAAAGA_3	Mesoderm-1	0	0.00676071	0.933467	0.0597727	0	0	0
CTGAAGTTCTGGAGCC_3	Mesoderm-1	0	0.306997	0.693003	0	0	0	0
CTGATAGAGTTAACGA_3	Mesoderm-2	0	0	0.00144708	0.998553	0	0	0
CTGATCCCAGTCGTGC_3	ExE-like	0	0	0	0	0	0	1
CTGCCTACAGATCGGA_3	ExE-like	0.0318516	0	0	0	0	0	0.968148
CTGCCTAGTGGGTCAA_3	ExE-like	0	0	0	0	0	0	1
CTGCGGATCTAACTCT_3	Mesoderm-2	0	0	0	1	0	0	0
CTGGTCTAGTACGTAA_3	Ectoderm	1	0	0	0	0	0	0
CTGTGCTGTGGACGAT_3	Ectoderm	0.995203	0	0	0	0	0	0.00479712
CTGTGCTTCCAGGGCT_3	Ectoderm	0.986006	0	0	0	0	0	0.0139942
CTGTTTATCGGAGCAA_3	Ectoderm	0.816919	0.0265071	0.0647082	0.0438443	0.0325551	0.0024596	0.013007
CTTAACTAGTCCCACG_3	Endoderm	0	0	0	0	0.974104	0.025896	0
CTTAACTGTGACTACT_3	ExE-like	0.00034477	0	0	0	0	0	0.999655
CTTACCGGTTAAGATG_3	Mesoderm-2	0	0	0.0497106	0.950289	0	0	0
CTTAGGAGTATAGTAG_3	Ectoderm	0.857457	0	0	0	0	0	0.142543
CTTAGGAGTCCGTCAG_3	Ectoderm	0.991169	0	0.00855852	0	0.000272295	0	0
CTTCTCTCACAGATTC_3	Mesoderm-1	0	0.49636	0.50364	0	0	0	0
CTTTGCGAGCGATGAC_3	Endoderm	0	0	0	0	0.98435	0.0156496	0
GAAATGAGTCATGCAT_3	ExE-like	0.000790519	0	0	0	0	0	0.999209
GAACGGAAGTTTGCGT_3	ExE-like	0	0	0	0	0	0	1
GAATAAGAGTGAACGC_3	Ectoderm	0.890111	0.0421965	0.03442	0.000620379	0.00650198	0.000411384	0.0257386
GAATGAAGTCCAGTAT_3	Mesoderm-2	0	0	0	1	0	0	0
GAATGAATCGACAGCC_3	ExE-like	0.189449	0	0	0	0	0	0.810551
GACACGCAGCGTCAAG_3	Mesoderm-2	0	0	0	1	0	0	0
GACACGCAGGGATGGG_3	Ectoderm	1	0	0	0	0	0	0
GACACGCGTACTTGAC_3	Ectoderm	0.777225	0.0215144	0.039206	7.07124e-06	0.0638213	0.0762679	0.0219583
GACACGCTCAAACGGG_3	ExE-like	0	0	0	0	0	0.00337832	0.996622
GACAGAGCAGGGTACA_3	Mesoderm-2	0	0	0	1	0	0	0
GACCAATTCGATGAGG_3	EPI-like	0	0.916031	0.0839687	0	0	0	0
GACGCGTAGGACGAAA_3	Mesoderm-2	0	0	0	1	0	0	0
GACGCGTTCAACACTG_3	ExE-like	0.180954	0	0	0	0	0	0.819046
GACGGCTAGTGTACCT_3	Mesoderm-2	0	0	0	1	0	0	0
GACGGCTCACCAGGCT_3	ExE-like	0.0507426	0	0.00493585	0.0384707	0.00245439	0	0.903396
GACGTGCGTCCGAGTC_3	ExE-like	0.0264364	0	0	1.26527e-05	0	0	0.973551
GACTAACCATTCACTT_3	Ectoderm	0.990559	0	0	0	0	0	0.00944123
GACTACATCGTTTATC_3	ExE-like	0	0	0	0	0	0	1
GACTGCGAGGGATCTG_3	Mesoderm-2	0.0575517	0	0.162566	0.74811	0	0	0.0317728
GACTGCGCATGCAATC_3	hPGCLC	0	0	0	0	0	1	0
GAGGTGAAGAGCTATA_3	ExE-like	0.012461	0	0	0	0	0	0.987539
GAGGTGAAGCGCCTTG_3	Ectoderm	0.945977	0	0	0	0	0	0.0540228
GAGGTGACAGCTGCAC_3	ExE-like	0	0	0	0	0	0	1
GAGGTGATCGGCTTGG_3	hPGCLC	0	0	0	0	0	1	0
GAGTCCGAGAGACTTA_3	Mesoderm-2	0	0	0	1	0	0	0
GATCAGTTCGTCTGCT_3	ExE-like	0.264692	0	0	0	0	0	0.735308
GATCGATAGAAACCGC_3	Mesoderm-2	0	0	0	1	0	0	0
GATCGCGCACCCAGTG_3	ExE-like	0.0304025	0	0	0.0178004	0	0	0.951797
GATCGTAAGATGCCTT_3	Mesoderm-2	0	0	0	1	0	0	0
GATCTAGCACGCTTTC_3	ExE-like	0.123394	0	0	0.141268	0.00416291	0	0.731175
GATCTAGGTTCCATGA_3	Mesoderm-1	0	0.260596	0.739404	0	0	0	0
GATGCTAAGTGTTGAA_3	ExE-like	0	0	0	0	0	0	1
GATGCTAGTAAAGTCA_3	Mesoderm-1	0.187602	0.249939	0.305859	0.0918288	0.155269	0	0.00950288
GATGCTAGTCAATACC_3	Mesoderm-2	0	0	0.199841	0.800159	0	0	0
GATTCAGAGCCCGAAA_3	Mesoderm-2	0	0	0	1	0	0	0
GATTCAGAGTTACGGG_3	Endoderm	0	0	0	0	0.966243	0.0337574	0
GATTCAGTCTTTAGGG_3	ExE-like	0	0	0	0.424933	0.000194566	0	0.574872
GCAAACTAGAATAGGG_3	ExE-like	0.0138772	0	0	0	0	0	0.986123
GCAATCAGTAGCTGCC_3	Mesoderm-2	0.0034305	0	0	0.991047	0.00552243	0	0
GCAATCATCGCCCTTA_3	ExE-like	0.0436498	0	0	0	0	0	0.95635
GCAATCATCGGATGGA_3	Endoderm	0	0	0	0	0.696888	0.303112	0
GCACATATCACTGGGC_3	Mesoderm-1	0	0	0.685174	0.314826	0	0	0
GCAGCCAGTGAGGCTA_3	ExE-like	0.348567	0	0	0	0	0	0.651433
GCAGTTAAGATCCCAT_3	ExE-like	0	0	0	0	0	0	1
GCAGTTACATCTATGG_3	Ectoderm	0.816394	0	0	0	0	0	0.183606
GCAGTTAGTAAATGAC_3	ExE-like	0.00681733	0	0	0.0101973	0	0	0.982985
GCATACAGTCGGCACT_3	ExE-like	0	0	0	0	0	0	1
GCATACATCTCGAGTA_3	Ectoderm	0.990729	0	0.0012673	0	0	0	0.00800398
GCATGATTCAGTACGT_3	Ectoderm	0.953034	0	0	0.00742886	0	0	0.0395373
GCATGATTCGGCTTGG_3	Mesoderm-2	0	0	0	1	0	0	0
GCATGCGAGATGTTAG_3	ExE-like	0.137961	0	0	0	0	0	0.862039
GCATGCGTCGCGGATC_3	Ectoderm	0.920379	0.0434375	0.03008	0	0.000973038	0.000131207	0.00499946
GCCAAATAGTGACTCT_3	Ectoderm	0.999365	0	0	0	0	0	0.000634562
GCCTCTATCTCTTGAT_3	ExE-like	0.0078991	0.309853	0.0345963	0.139583	0.000859346	0	0.507208
GCGCAACGTTGACGTT_3	Ectoderm	0.999193	0	0	0	0.000525924	0	0.000281402
GCGCAGTCATCGGAAG_3	Ectoderm	0.619795	0	0.0140764	0.0672821	0.00150943	0	0.297337
GCGCAGTGTATATGAG_3	Ectoderm	0.493793	0.059906	0.00710558	0	0.000321576	0	0.438874
GCGCAGTGTCACACGC_3	ExE-like	0	0	0	0	0	0	1
GCGCGATGTCAGTGGA_3	hPGCLC	0	0	0	0	0	1	0
GCTCTGTCATTGGGCC_3	Ectoderm	0.793998	0	0	0	3.71435e-05	0	0.205965
GCTCTGTGTACCATCA_3	ExE-like	0	0	0	0	0	0	1
GCTGCAGAGTCAAGCG_3	Ectoderm	1	0	0	0	0	0	0
GCTGCAGTCTTCGAGA_3	ExE-like	0	0	0	0	0	0	1
GCTGCGATCTCGGACG_3	ExE-like	0	0	0	0	0	0	1
GCTGCTTAGAGCTGCA_3	Ectoderm	0.953931	0	0	0	0	0	0.0460689
GCTGCTTAGCCCAGCT_3	ExE-like	0	0	0	0	0	0	1
GCTGGGTCAGGTGGAT_3	Mesoderm-2	0	0	0	1	0	0	0
GCTTCCAGTACAGTTC_3	Mesoderm-1	0.0151268	0.372369	0.612504	0	0	0	0
GCTTCCATCCAACCAA_3	hPGCLC	0	0	0	0	0	1	0
GCTTGAACACAGGAGT_3	Ectoderm	0.990863	0	0	0	0	0	0.00913703
GCTTGAAGTCAACATC_3	ExE-like	0	0	0	0	0	0	1
GGAAAGCCAATGCCAT_3	Ectoderm	1	0	0	0	0	0	0
GGAAAGCCACGGTTTA_3	Mesoderm-2	0	0	0	0.992908	0.00709226	0	0
GGAAAGCGTAAGTTCC_3	ExE-like	0.0165198	0	0	0	0	0	0.98348
GGACAGACATAGGATA_3	ExE-like	0.015439	0.158864	0.0224415	0.0548053	0.00253614	0	0.745914
GGACATTCAACTTGAC_3	hPGCLC	0	0	0	0	0	1	0
GGATGTTGTGCAGACA_3	Ectoderm	0.995167	0	0	0	0	0	0.00483342
GGATTACAGCTTCGCG_3	Mesoderm-2	0	0	0.00566071	0.994339	0	0	0
GGCAATTGTCAAACTC_3	ExE-like	0.332143	0	0.00616826	0.0299348	0.00105884	0	0.630695
GGCAATTTCTGGTATG_3	Endoderm	0	0	0	0	1	0	0
GGCGACTAGGGTTTCT_3	Endoderm	0	0	0	0	1	0	0
GGCGTGTCACGAAATA_3	ExE-like	0.0650864	0	0	0.0955226	0	0	0.839391
GGCTCGAAGATCCCAT_3	ExE-like	0.00267123	0	0	0	0	0	0.997329
GGCTCGAAGTGACTCT_3	ExE-like	0.00670411	0	0	0	0	0	0.993296
GGCTCGATCAGCGACC_3	ExE-like	0	0	0	0	0	0	1
GGCTGGTTCCCTTGTG_3	Ectoderm	0.615666	0	0	0	0	0	0.384334
GGGACCTGTCGGATCC_3	hPGCLC	0	0	0	0	0	1	0
GGGAGATCAATAGCGG_3	Mesoderm-1	0.152367	0.403989	0.443644	0	0	0	0
GGGATGAAGGCCCTCA_3	hPGCLC	0	0	0	0	0	1	0
GGGATGACATACCATG_3	Mesoderm-2	0	0	0	1	0	0	0
GGGATGAGTGCAGACA_3	ExE-like	0	0	0	0	0	0	1
GGGCACTTCGCGTAGC_3	ExE-like	0	0	0	0	0	0	1
GGGCATCGTCAGATAA_3	ExE-like	0.177319	0	0	0	0	0	0.822681
GGGTCTGAGGCCCTTG_3	Endoderm	0	0	0	0	0.951536	0.0484641	0
GGGTCTGTCAGCCTAA_3	Mesoderm-2	0	0	0	1	0	0	0
GGTATTGAGACGCACA_3	Mesoderm-2	0	0	0	1	0	0	0
GGTGAAGGTCCGACGT_3	ExE-like	0	0	0	0	0	0	1
GGTGAAGTCGACAGCC_3	Mesoderm-2	0	0	0	1	0	0	0
GGTGTTACAGACGCAA_3	Mesoderm-1	0	0	0.775622	0.224378	0	0	0
GGTGTTACATGCCCGA_3	Ectoderm	0.98292	0	0	0	0	0	0.01708
GTAACGTAGAGGTTGC_3	Ectoderm	0.991436	0	0	0	0	0	0.00856436
GTAGGCCGTTGAGTTC_3	Mesoderm-2	0	0	0.0168661	0.983134	0	0	0
GTAGTCATCTCGAGTA_3	ExE-like	0	0	0	0	0	0	1
GTCACGGCAAGTCATC_3	Mesoderm-2	0	0	0	1	0	0	0
GTCGGGTAGTGTACCT_3	Endoderm	0	0	0	0	1	0	0
GTCGGGTCAGCCTTGG_3	ExE-like	0	0	0	0	0	0	1
GTCGGGTGTAAACACA_3	Mesoderm-2	0	0	0.00147776	0.998522	0	0	0
GTCGTAAGTCAATGTC_3	ExE-like	0	0	0	0	0	0	1
GTCTCGTGTGACGGTA_3	ExE-like	0.00149504	0	0	0	0	0	0.998505
GTCTCGTGTTCGCGAC_3	Mesoderm-2	0	0	0.0394589	0.960541	0	0	0
GTCTTCGTCAAGAAGT_3	ExE-like	0.00499876	0	0	0	0	0	0.995001
GTGCGGTCATGGTCTA_3	ExE-like	0	0	0	0	0	0	1
GTGCGGTGTTGAGGTG_3	Endoderm	0	0	0	0	0.508828	0.491172	0
GTGCTTCGTAAAGGAG_3	hPGCLC	0	0	0	0	0	1	0
GTGGGTCAGGAGTTGC_3	Ectoderm	0.42633	0.0859648	0.184193	0.299198	0.00431426	0	0
GTTCGGGGTCCGTTAA_3	hPGCLC	0	0	0	0	0.290427	0.709573	0
TAAACCGAGGCTAGAC_3	Mesoderm-1	0.0212905	0.165588	0.662973	0.122711	0	0.0274374	0
TAAGCGTAGACACGAC_3	Endoderm	0	0	0	0	0.65949	0.34051	0
TAAGCGTGTTACGGAG_3	Mesoderm-1	0	0	0.893086	0.106914	0	0	0
TAAGTGCAGTTAACGA_3	ExE-like	0.167598	0	0	0	0	0	0.832402
TAAGTGCGTATAGTAG_3	Endoderm	0	0	0	0	1	0	0
TAAGTGCTCGGCATCG_3	Mesoderm-1	0	0.0112796	0.893973	0.0947477	0	0	0
TACAGTGCAAGTCTAC_3	ExE-like	0.362344	0.0436545	0.00101226	0	0	0	0.59299
TACAGTGCAGATCCAT_3	Mesoderm-2	0	0	0	0.904787	0.0952131	0	0
TACCTTACAAGTCATC_3	Mesoderm-2	0	0	0	0.893305	0.0553044	0	0.0513901
TACGGGCAGTAAGTAC_3	Ectoderm	1	0	0	0	0	0	0
TACGGGCGTCTTCTCG_3	Mesoderm-1	0.0536298	0.23125	0.643839	0.0206769	0	0.0506045	0
TACGGTAAGGTACTCT_3	Ectoderm	0.955704	0.00481745	0.0138163	0	0	0	0.0256625
TACGGTACAGACAAAT_3	Mesoderm-2	0.00302556	0	0	0.991471	0.00550336	0	0
TACTCATCAAGTACCT_3	ExE-like	0.0906675	0.0927647	0.0100723	0.0120128	0.00144324	0	0.793039
TACTCATCACTAAGTC_3	ExE-like	0	0	0	0	0	8.00583e-05	0.99992
TACTCATGTAAACCTC_3	Endoderm	0	0	0	0	1	0	0
TACTTGTTCCTTTACA_3	ExE-like	0	0	0	0	0	0	1
TACTTGTTCGTGACAT_3	Ectoderm	0.873823	0	0	0	0	0	0.126177
TAGACCAGTCTCCATC_3	Ectoderm	1	0	0	0	0	0	0
TAGACCAGTCTCTTAT_3	Mesoderm-2	0	0	0	1	0	0	0
TAGCCGGAGATATGCA_3	ExE-like	0	0	0	0	0	0	1
TAGGCATAGCAGCGTA_3	ExE-like	0	0	0	0	0	0	1
TATCTCAAGCGTAATA_3	ExE-like	0	0	0	0	0	0	1
TATCTCACAAGACGTG_3	ExE-like	0.144228	0	0	0	0	0	0.855772
TATTACCTCCAAATGC_3	Ectoderm	1	0	0	0	0	0	0
TCAACGAGTTATCGGT_3	Mesoderm-2	0	0	0.00886534	0.991135	0	0	0
TCAACGAGTTCAGTAC_3	Endoderm	0	0	0	0	0.995579	0.00442112	0
TCAATCTGTGGCCCTA_3	Endoderm	0	0	0	0.0015463	0.720947	0.277507	0
TCACAAGCAAAGCAAT_3	EPI-like	0	0.648755	0.351245	0	0	0	0
TCACAAGTCTGGTTCC_3	EPI-like	0.124411	0.48308	0.389201	0	0.00315455	0	0.000153353
TCACGAACATACGCTA_3	ExE-like	0.0104862	0	0	0	0	0	0.989514
TCAGATGGTCCGCTGA_3	Mesoderm-2	0.0206882	0	0	0.880955	0.000865883	0	0.0974908
TCAGCAAAGTACGCGA_3	ExE-like	0.209734	0.130015	0.09752	0	0.000547566	0	0.562183
TCAGCAACAACGATCT_3	Mesoderm-2	0	0	0.0310738	0.968926	0	0	0
TCAGCAAGTACTTCTT_3	hPGCLC	0	0	0	0	0	1	0
TCAGCAATCTTGTTTG_3	ExE-like	0	0	0	0	0	0	1
TCAGGTAGTCAATGTC_3	ExE-like	0.329081	0	0.000240242	0.00179911	0.00127305	0	0.667607
TCAGGTAGTTCCACAA_3	Mesoderm-2	0	0	0	1	0	0	0
TCATTACGTGACAAAT_3	Mesoderm-1	0.0310747	0.165376	0.723962	0.0247729	0	0.0548144	0
TCATTACTCCAGTAGT_3	Mesoderm-2	0	0	0.383485	0.616515	0	0	0
TCATTACTCGACAGCC_3	Ectoderm	0.738802	0	0	0.0591509	0	0	0.202047
TCCACACCACCAGCAC_3	Ectoderm	0.603482	0	0	0	0	0	0.396518
TCCCGATCACGGCTAC_3	Ectoderm	0.638945	0	0	0	0	0	0.361055
TCCCGATGTCTCTCTG_3	Mesoderm-1	0	0.0857037	0.913934	0.000361902	0	0	0
TCGTACCCATGTAAGA_3	ExE-like	0	0	0	0	0	0	1
TCGTACCGTAAACACA_3	hPGCLC	0	0	0	0	0	1	0
TCTATTGGTGGTACAG_3	ExE-like	0	0	0	0	0	0	1
TCTCATACAAGTTCTG_3	hPGCLC	0	0	0	0	0	1	0
TCTCTAATCGTGGGAA_3	Endoderm	0	0	0	0	0.706429	0.293571	0
TCTGAGAGTTCATGGT_3	Mesoderm-2	0	0	0.00598026	0.589243	0.02131	0	0.383466
TCTGAGATCGTTTGCC_3	hPGCLC	0	0	0	0	0	1	0
TCTTCGGGTAGCGTAG_3	ExE-like	0.0212915	0	0	0	0	0	0.978708
TGAAAGAAGTTGTAGA_3	hPGCLC	0	0	0	0	0	1	0
TGAAAGATCAGCTGGC_3	ExE-like	0.0923445	0	0	0	0	0	0.907655
TGACAACAGTAGGCCA_3	Ectoderm	0.577971	0	0	0.00478073	0	0	0.417249
TGACGGCGTAAGGATT_3	Ectoderm	0.96526	0	0	0	0	0	0.0347404
TGACTAGCATACCATG_3	ExE-like	0	0	0	0	0	0	1
TGACTAGGTGCACCAC_3	Mesoderm-2	0	0	0	1	0	0	0
TGACTAGGTGGTCCGT_3	ExE-like	0	0	0	0	0	0	1
TGACTAGTCCCATTAT_3	Mesoderm-2	0	0	0	1	0	0	0
TGACTTTGTAGAAGGA_3	ExE-like	0.197843	0	0	0	0	0	0.802157
TGATTTCAGGCTAGAC_3	ExE-like	0	0	0	0	0	0	1
TGATTTCGTTCCAACA_3	ExE-like	0	0	0	0	0	0	1
TGCCAAACAGCTCGCA_3	Mesoderm-2	0	0	0.027595	0.972405	0	0	0
TGCCAAATCGTCCGTT_3	Mesoderm-1	0.0271713	0.0212519	0.562549	0.389028	0	0	0
TGCGGGTAGTGTTAGA_3	ExE-like	0.160886	0.0269925	0.00464934	0.39256	0.00890842	0	0.406004
TGCGGGTCACGACTCG_3	ExE-like	0.285526	0.078504	0	0.0174757	0.0100528	0	0.608442
TGCGGGTCAGACGCAA_3	ExE-like	0	0	0	0	0	0	1
TGCTACCAGCGTCTAT_3	Mesoderm-2	0	0	0	1	0	0	0
TGCTACCAGTACGACG_3	ExE-like	0	0	0	0	0	0	1
TGCTGCTCATCCCATC_3	Mesoderm-2	0	0	0.0310973	0.968903	0	0	0
TGGCCAGAGACCTTTG_3	ExE-like	0.0139918	0	0	0	0	0	0.986008
TGGCCAGGTTCTGAAC_3	hPGCLC	0	0	0	0	0.0641621	0.935838	0
TGGCGCAAGCCAACAG_3	ExE-like	0.00296245	0	0	0	0	0.0231236	0.973914
TGGCGCATCGCCTGAG_3	ExE-like	0.00345208	0	0	0	0	0	0.996548
TGGGAAGAGACTGTAA_3	Ectoderm	0.875139	0.0639221	0.0607556	0	0.000183435	0	0
TGGGAAGAGTGCCATT_3	Endoderm	0	0	0	0	1	0	0
TGGGAAGCAGCGTCCA_3	Ectoderm	0.970305	0	0	0	0	0	0.0296954
TGGGAAGGTTACGACT_3	ExE-like	0	0	0	0	0	0	1
TGGGAAGTCCTTAATC_3	Ectoderm	1	0	0	0	0	0	0
TGGGCGTCAGCGTAAG_3	Mesoderm-2	0	0	0	1	0	0	0
TGGGCGTGTATAGGTA_3	Ectoderm	0.991887	0	0	0	0	0	0.00811273
TGGGCGTGTGCTTCTC_3	Endoderm	0	0	0	0	1	0	0
TGTATTCAGTGGTCCC_3	ExE-like	0.00319857	0	0	0	0	0	0.996801
TGTATTCCAATAGAGT_3	EPI-like	0.0260451	0.420201	0.131662	0.0451351	0.00365517	0	0.373302
TGTATTCCAGTATAAG_3	EPI-like	0	1	0	0	0	0	0
TGTCCCACAGGAACGT_3	ExE-like	0.0109117	0	0	0	0	0	0.989088
TGTTCCGGTCAATACC_3	Mesoderm-1	0.290421	0.29031	0.305135	0.0779512	0.00473155	0	0.0314512
TTAGGCAAGGACAGCT_3	EPI-like	0	0.781566	0.218434	0	0	0	0
TTCCCAGCAGCCTGTG_3	ExE-like	0.255578	0	0	0	0	0	0.744422
TTCCCAGTCAACGGGA_3	Ectoderm	0.818089	0	0	0	0	0	0.181911
TTCTACAAGATGCCTT_3	EPI-like	0	0.8882	0.1118	0	0	0	0
TTCTACAGTATGGTTC_3	Ectoderm	0.8287	0	0	0	0	0	0.1713
TTCTACAGTCGGATCC_3	ExE-like	0.0100753	0	0	0	0	0	0.989925
TTCTACAGTTCGTTGA_3	Mesoderm-2	0	0	0	1	0	0	0
TTCTACATCATGTGGT_3	Mesoderm-2	0	0.00664613	0.335844	0.649184	0	0	0.00832637
TTCTCAAAGGAACTGC_3	Endoderm	0	0	0	0	0.987257	0.0127433	0
TTCTCAATCTGTCTCG_3	Mesoderm-1	0	0.201988	0.798012	0	0	0	0
TTCTCCTCAGTATGCT_3	EPI-like	0	0.881673	0.118327	0	0	0	0
TTCTTAGAGGGAACGG_3	Ectoderm	1	0	0	0	0	0	0
TTCTTAGAGTTCCACA_3	Ectoderm	1	0	0	0	0	0	0
TTCTTAGTCAGCTGGC_3	Endoderm	0	0	0	0	1	0	0
TTGAACGTCGAGGTAG_3	Ectoderm	0.903897	0	0	0	0.00149473	0	0.0946079
TTGCGTCCACGAAATA_3	ExE-like	0	0	0	0	0	0	1
TTGCGTCCATGTCTCC_3	Mesoderm-1	0	0.216947	0.783053	0	0	0	0
TTGGCAAAGAGGGATA_3	ExE-like	0.0401685	0.346436	0.0589736	0.0157898	0.00311347	0	0.535518
TTGGCAAGTCAGCTAT_3	ExE-like	0	0	0	0	0	0	1
TTGTAGGCATTCGACA_3	ExE-like	0	0	0	0	0	0	1
TTGTAGGGTAAGGATT_3	Mesoderm-1	0	0	0.564264	0.435736	0	0	0
TTGTAGGTCGGCTTGG_3	ExE-like	0	0	0	0	0	0	1
TTTATGCCAGGTCGTC_3	Mesoderm-2	0	0	0.0104776	0.989522	0	0	0
TTTCCTCCATTCCTGC_3	hPGCLC	0	0	0	0	0	1	0
TTTGTCAGTAAGAGAG_3	hPGCLC	0	0	0	0	0	1	0
