# Supplementary material for: High-resolution transcriptional and morphogenetic profiling of cells from micropatterned human ESC gastruloid cultures
Source: eLife journal article supplement (doi:10.7554/elife.59445), 2020-11-18
Supplement: supp [file elife-59445-supp-v1.zip › elife_poa_e59445_Source_data_6.xlsx]

## Sheet: Reseed.up.down.genes
Downreulgated and upreuglated genes in reseed vs. gastruloid														Average gene expression correlation between reseed and gastruloid on the basic of top 2,000 shared HVGs
Downreuglated genes							Upregulated genes									Reseed
gene	p_val	avg_logFC	pct.1	pct.2	p_val_adj		gene	p_val	avg_logFC	pct.1	pct.2	p_val_adj				Ectoderm	EPI-like	Mesoderm-1	Mesoderm-2	Endoderm	hPGCLC	ExE-like
MIR302B	4.75e-137	-2.30458	0	0.691	1.11e-132		PSMG1	1.49e-38	0.250108	0.908	0.699	3.49e-34		Gastruloid	Ectoderm	0.801071	0.811478	0.773782	0.760448	0.764827	0.738231	0.780773
U2AF1	6.15e-148	-1.61253	0.171	0.776	1.44e-143		CHCHD2	1.06e-43	0.250128	0.994	0.958	2.48e-39			EPI-like	0.672532	0.830048	0.797914	0.748427	0.739896	0.739159	0.674074
PSMA2.1	2.27e-138	-1.40537	0	0.695	5.32e-134		STMN1	2.61e-38	0.250342	1	0.999	6.12e-34			Mesoderm-1	0.703003	0.845823	0.840012	0.805328	0.770971	0.755918	0.701769
GAL	3.9e-144	-1.4045	0.639	0.962	9.13e-140		POLR2C	6.21e-40	0.250417	0.975	0.779	1.46e-35			Mesoderm-2	0.730396	0.806215	0.832231	0.871082	0.769191	0.717071	0.735855
UQCR11.1	3.08e-138	-1.35517	0	0.695	7.22e-134		HOXB8	7.69e-175	0.250779	0.405	0.02	1.8e-170			Endoderm	0.71313	0.791299	0.790244	0.801776	0.842547	0.778034	0.717955
RP11-426L16.8	2.71e-119	-1.33947	0	0.634	6.36e-115		MRPL39	8.64e-47	0.250854	0.862	0.589	2.03e-42			hPGCLC	0.677513	0.778372	0.75879	0.717454	0.799746	0.863794	0.692272
RPSAP58	3.08e-138	-1.27041	0	0.695	7.22e-134		MRPS6	7.88e-35	0.251222	0.99	0.94	1.85e-30			ExE-like	0.698094	0.725999	0.685528	0.689214	0.713095	0.701679	0.738084
L1TD1	9.49e-172	-1.2174	0.501	0.985	2.22e-167		GNG5	5.17e-49	0.251479	1	0.986	1.21e-44
RARRES2	1.31e-201	-1.19942	0.2	0.92	3.07e-197		H2AFY	1.31e-35	0.252002	0.979	0.907	3.06e-31
NDUFB8.1	4.18e-138	-1.18898	0	0.694	9.79e-134		SRSF8	2.36e-142	0.252375	0.451	0.047	5.53e-138		Top 2,000 shared HVG between reseed and gastruloid
NHP2L1	3.51e-137	-1.18085	0	0.691	8.22e-133		NCK1	2.18e-44	0.253272	0.701	0.427	5.1e-40		ACTC1
SF3B14	7.68e-138	-1.09933	0	0.693	1.8e-133		MED31	7.13e-46	0.25468	0.789	0.519	1.67e-41		IGFBP3
MATR3	3.44e-138	-1.01886	0.025	0.705	8.07e-134		CCT8	1.15e-52	0.25546	1	0.977	2.68e-48		CER1
C11orf48	1.18e-136	-0.998853	0	0.69	2.76e-132		SNHG19	2.6e-93	0.255738	0.66	0.173	6.1e-89		CTSV
IGFBP2	2.24e-147	-0.952228	0.463	0.87	5.25e-143		MPST	2.19e-38	0.255832	0.95	0.794	5.13e-34		PLA2G2A
DPPA4	1.03e-156	-0.951564	0.689	0.951	2.41e-152		COX7A2	3.77e-60	0.256407	1	1	8.82e-56		CXCL14
CER1	2.7e-58	-0.939329	0.021	0.416	6.32e-54		SSR3	1.29e-40	0.258119	0.979	0.942	3.01e-36		DLK1
SET	1.35e-187	-0.929324	0.998	1	3.17e-183		ILK	1.44e-34	0.258176	0.877	0.733	3.38e-30		IGFBP5
MRP63	7.22e-136	-0.919935	0	0.687	1.69e-131		CD59	1.11e-34	0.258474	0.858	0.684	2.59e-30		C8orf4
POU5F1	8.48e-150	-0.913224	0.662	0.983	1.99e-145		ANXA6	3.42e-39	0.258653	0.758	0.538	8.01e-35		ANKRD1
CBS	2.67e-128	-0.904495	0.073	0.695	6.25e-124		ALG5	1.77e-44	0.25907	0.804	0.567	4.14e-40		CLDN10
RP11-1144P22.1	2.76e-121	-0.902012	0.115	0.728	6.47e-117		DPM1	6.15e-40	0.259313	0.95	0.804	1.44e-35		KRT19
PTPLAD1	4.82e-134	-0.887814	0	0.682	1.13e-129		H2AFY2	6.2e-38	0.259573	0.975	0.835	1.45e-33		HPGD
PSIP1	6.44e-141	-0.85044	0.96	0.984	1.51e-136		SLBP	1.82e-36	0.260137	0.921	0.744	4.26e-32		SPARCL1
KIAA0020	1.83e-131	-0.844761	0	0.674	4.28e-127		STRAP	1.11e-44	0.260869	0.998	0.931	2.61e-40		RGS5
CTSV	0.0243823	-0.834325	0.927	0.914	1		ASNSD1	5.22e-38	0.261067	0.921	0.804	1.22e-33		LHX1
GJA1	1.55e-132	-0.804743	0.85	0.98	3.63e-128		RP11-148B6.1	4.31e-39	0.262481	0.628	0.259	1.01e-34		TRIML2
SERPINB9	3.84e-107	-0.793	0.42	0.846	9e-103		PPA2	8.56e-45	0.262717	0.931	0.737	2.01e-40		CYP1B1
TDGF1	8.74e-97	-0.78754	0.234	0.749	2.05e-92		TXNDC9	4.86e-48	0.263611	0.933	0.741	1.14e-43		IGF1
UGP2	1.28e-105	-0.783551	0.923	0.973	3.01e-101		SRP9	9.1e-52	0.264002	1	0.979	2.13e-47		TPM1
EZR	2.84e-114	-0.775376	0.633	0.92	6.64e-110		RAN	6.99e-52	0.26435	1	0.996	1.64e-47		HAND1
COX16	6.36e-161	-0.765232	0.555	0.901	1.49e-156		PCYT2	2.02e-55	0.26436	0.693	0.382	4.74e-51		PDPN
NUCKS1	1.73e-189	-0.759636	0.998	1	4.05e-185		SBDS	1.21e-41	0.264505	0.866	0.676	2.85e-37		MESP1
EPCAM	2.39e-103	-0.750989	0.347	0.912	5.61e-99		GUK1	3.09e-51	0.264521	0.985	0.907	7.24e-47		LEFTY2
SFRP2	5.28e-137	-0.740408	0.303	0.886	1.24e-132		MME	5.6e-89	0.265025	0.505	0.128	1.31e-84		DKK4
NCL	3.74e-128	-0.715174	0.998	1	8.76e-124		ILF2	6.54e-47	0.265504	0.996	0.95	1.53e-42		LINC00458
NTS	3.46e-68	-0.713321	0.802	0.978	8.1e-64		FTH1	2.43e-55	0.26606	1	1	5.7e-51		EMX2
C19orf10	4.43e-131	-0.712248	0	0.672	1.04e-126		PYURF	6.86e-42	0.266146	0.944	0.787	1.61e-37		EPAS1
IGFBP3	2.14e-40	-0.711838	0.015	0.311	5.01e-36		WIPI1	6.58e-71	0.266247	0.562	0.206	1.54e-66		IGFBP7
TUBB2B	8.27e-79	-0.69676	0.954	0.968	1.94e-74		GPSM3	4.44e-88	0.267142	0.582	0.192	1.04e-83		DKK1
SLC39A10	5.29e-135	-0.696353	0.775	0.955	1.24e-130		PLPPR5	6.5e-223	0.267199	0.438	0.009	1.52e-218		RP11-149I23.3
TMEM66	6.43e-129	-0.688149	0	0.665	1.51e-124		C14orf2	1.4e-71	0.268333	1	0.998	3.28e-67		KRT8
PLA2G16	2.93e-107	-0.677259	0.19	0.756	6.87e-103		REXO2	1.63e-33	0.268402	0.96	0.894	3.83e-29		NTS
ID1	1.08e-79	-0.672891	0.768	0.955	2.54e-75		RPL15	9.97e-130	0.269191	1	1	2.34e-125		GABRP
SNORA76	2.09e-127	-0.666365	0	0.661	4.9e-123		ATP2B1	2.87e-32	0.269248	0.937	0.829	6.72e-28		GAL
FST	6.08e-74	-0.665728	0.301	0.705	1.43e-69		RPS2	1.46e-71	0.27041	1	1	3.42e-67		ISL1
TERF1	3.56e-59	-0.652172	0.9	0.939	8.34e-55		HOPX	1.19e-186	0.27062	0.359	0.006	2.79e-182		SAT1
C1orf86	2.08e-125	-0.646448	0	0.654	4.88e-121		CFAP36	2.04e-156	0.270728	0.643	0.099	4.78e-152		KRT18
DDT	1.71e-110	-0.642354	0.956	0.985	4e-106		GABPB1	4.09e-75	0.270805	0.785	0.389	9.58e-71		DIO3
NRD1	1.9e-122	-0.636344	0	0.644	4.45e-118		PSMB7	5.65e-53	0.271516	1	0.969	1.32e-48		GRP
RPS8	6.84e-241	-0.636235	1	1	1.6e-236		SPRY1	3.35e-38	0.271796	0.727	0.475	7.84e-34		WLS
SLC38A1	2.8e-111	-0.636178	0.61	0.914	6.57e-107		RPL7	1.26e-74	0.271966	1	1	2.94e-70		DLX5
CALB1	1.73e-105	-0.633421	0.063	0.641	4.06e-101		BAALC	1.63e-129	0.272102	0.472	0.07	3.82e-125		DOK4
DEK	1.22e-129	-0.629921	0.95	0.976	2.87e-125		DAP	3.92e-54	0.272705	0.831	0.531	9.18e-50		AKR1C1
CRABP1	2.07e-124	-0.626302	0.338	0.832	4.84e-120		DCAF13	5.8e-41	0.272891	0.973	0.85	1.36e-36		ANXA1
BPTF	4.73e-120	-0.619667	0.616	0.924	1.11e-115		PDCD5	6.18e-48	0.272912	0.994	0.967	1.45e-43		HOXB6
CDH1	9.35e-102	-0.617885	0.119	0.68	2.19e-97		FAM92A1	1.93e-59	0.273154	0.785	0.463	4.52e-55		RP11-598D14.1
GTF2I	2.77e-107	-0.617519	0.933	0.992	6.48e-103		EBPL	1.7e-28	0.273627	0.958	0.838	3.99e-24		MALAT1
EIF4A1	4.77e-45	-0.614134	0.998	0.95	1.12e-40		TPRKB	1.25e-49	0.274718	0.981	0.873	2.93e-45		DBI
HELLS	4.86e-98	-0.612693	0.866	0.97	1.14e-93		PLPP5	4.53e-145	0.275625	0.656	0.113	1.06e-140		SLC8A1
SFPQ	4.14e-114	-0.604072	0.919	0.983	9.7e-110		COL1A1	4.93e-121	0.276273	0.455	0.072	1.15e-116		CALM2
CLU	9.72e-91	-0.603106	0.171	0.667	2.28e-86		ARHGDIA	1.48e-46	0.276677	0.921	0.739	3.47e-42		GPC3
NASP	1.82e-143	-0.602383	0.998	0.998	4.27e-139		PARK7	4.25e-73	0.276799	1	0.994	9.96e-69		ATP2B1
HNRNPD	5.6e-114	-0.598571	0.956	0.99	1.31e-109		GTF2A2	6.3e-52	0.277295	0.99	0.916	1.48e-47		NEAT1
SEMA6A	2.2e-83	-0.587401	0.353	0.771	5.16e-79		NDUFA4	1.67e-88	0.277711	1	1	3.92e-84		RSPO3
DMKN	4.7e-111	-0.586256	0.633	0.949	1.1e-106		MPHOSPH6	4.29e-47	0.278632	0.933	0.791	1.01e-42		VIM
PRRC2C	1.99e-137	-0.581622	0.948	0.993	4.67e-133		FGF19	1.46e-10	0.27967	0.328	0.226	3.43e-06		KRT7
FNBP1L	1.39e-99	-0.572176	0.666	0.937	3.27e-95		MYL6	1.02e-63	0.280013	1	1	2.39e-59		LIX1
TSTD1	1.38e-114	-0.571239	0.683	0.951	3.24e-110		MRPL50	1.88e-50	0.280589	0.958	0.803	4.4e-46		RPS4Y1
SPATS2L	1.66e-82	-0.565535	0.601	0.852	3.89e-78		RANBP1	4.59e-63	0.280932	1	0.995	1.08e-58		APOA2
MIXL1	1.08e-49	-0.563971	0.19	0.546	2.54e-45		RBM3	3.06e-44	0.281159	0.987	0.884	7.17e-40		SOX17
POLR3G	2.49e-65	-0.551616	0.228	0.611	5.84e-61		FABP5	1.21e-08	0.281168	0.994	0.984	0.000283237		TAGLN
HNRNPA3	2.55e-96	-0.550808	0.996	0.999	5.98e-92		STOML2	1.61e-52	0.281302	0.994	0.912	3.77e-48		MIXL1
RBM27	1.97e-126	-0.549397	0.117	0.718	4.62e-122		CKS1B	4.97e-31	0.281659	0.998	0.981	1.16e-26		MT1X
CLDN6	6.57e-93	-0.549318	0.482	0.929	1.54e-88		SNRNP40	5.32e-55	0.281751	0.927	0.712	1.25e-50		S100A10
TRIML2	3.78e-41	-0.548248	0.071	0.396	8.85e-37		VBP1	6.83e-53	0.28186	0.983	0.936	1.6e-48		CRH
MT-ND2	8.18e-72	-0.547586	0.981	0.989	1.92e-67		CNBP	6.15e-46	0.282099	0.996	0.906	1.44e-41		HAPLN1
CBX1	7.17e-105	-0.545039	0.952	0.994	1.68e-100		RPS3A	4.08e-94	0.282107	1	1	9.55e-90		FABP5
PMAIP1	3.45e-84	-0.539684	0.307	0.792	8.08e-80		TCEAL8	1.39e-45	0.282931	0.994	0.964	3.25e-41		PRRX1
MT-ND4L	3.25e-78	-0.534766	0.712	0.911	7.61e-74		MAD2L1	4.74e-31	0.283461	0.912	0.836	1.11e-26		HAS2
SCG3	1.37e-94	-0.533425	0.447	0.836	3.22e-90		VPS28	3.76e-44	0.284097	0.925	0.752	8.81e-40		MEIS2
CENPE	1.64e-53	-0.532861	0.566	0.809	3.85e-49		NT5C3B	8.63e-50	0.284567	0.906	0.668	2.02e-45		APLNR
ANP32E	2.76e-106	-0.531386	0.908	0.975	6.46e-102		RCSD1	1.58e-145	0.284642	0.491	0.063	3.7e-141		TFPI
HEBP2	2.09e-91	-0.530058	0.795	0.933	4.89e-87		2020-09-11	4.85e-35	0.28533	0.979	0.954	1.14e-30		SFRP1
CEBPZ	3.2e-66	-0.526957	0.923	0.968	7.49e-62		IGFBP7	2.53e-06	0.285942	0.357	0.269	0.0592079		CLU
SPINT2	7.79e-79	-0.524884	0.637	0.901	1.83e-74		UBE2T	1.51e-37	0.286173	0.929	0.803	3.53e-33		NKX2-5
EIF3A	2.13e-116	-0.523403	0.921	0.987	4.98e-112		C4orf3	7.06e-47	0.286714	0.994	0.948	1.65e-42		SCGN
TPM3	5.97e-82	-0.521299	0.992	0.998	1.4e-77		MDFI	1.67e-50	0.287334	0.804	0.507	3.91e-46		HES1
SOX4	6.1e-68	-0.5202	0.954	0.989	1.43e-63		RPL3	3.25e-65	0.287833	1	1	7.61e-61		FGFBP3
CLDN10	6.47e-56	-0.516325	0.148	0.541	1.52e-51		MZT1	1.03e-44	0.28966	0.883	0.713	2.42e-40		STMN2
LSMD1	3.44e-116	-0.515247	0	0.623	8.06e-112		FBLN1	3.35e-27	0.290066	0.948	0.864	7.86e-23		SOX2
TCEA1	2.23e-67	-0.514852	0.952	0.981	5.23e-63		2020-09-09	3.61e-48	0.2905	0.883	0.727	8.46e-44		FGF17
PARP1	6.76e-100	-0.512224	0.956	0.98	1.58e-95		PRMT1	4.47e-49	0.291258	0.996	0.948	1.05e-44		UBE2C
HSPH1	1.25e-83	-0.51042	0.716	0.909	2.92e-79		HDDC2	1.15e-50	0.291794	0.985	0.897	2.7e-46		RHOBTB3
MT-ND5	3.41e-100	-0.509732	0.898	0.963	7.99e-96		EIF3I	2.4e-45	0.2918	0.994	0.891	5.62e-41		SESN3
ATP5H	6e-104	-0.509609	0.983	0.983	1.41e-99		COPS8	9.93e-52	0.29214	0.954	0.8	2.33e-47		TMEM54
BASP1	9.58e-79	-0.507857	0.486	0.844	2.24e-74		EIF4A2	1.11e-45	0.292491	0.992	0.948	2.6e-41		TOP2A
USP44	1.02e-64	-0.50602	0.077	0.499	2.39e-60		COX7A2L	6.75e-51	0.292793	0.983	0.829	1.58e-46		FAM184A
NEFM	2.66e-94	-0.504889	0.079	0.621	6.24e-90		CDK4	2.82e-46	0.292976	0.992	0.876	6.6e-42		EPCAM
MDN1	3.22e-86	-0.504093	0.415	0.788	7.55e-82		ERCC1	1.42e-58	0.293035	0.823	0.522	3.32e-54		CTSL
COX7C	2.1e-171	-0.503216	1	1	4.91e-167		HEY1	8.25e-55	0.293838	0.509	0.197	1.93e-50		TFAP2C
HSP90AA1	1.3e-143	-0.502642	1	1	3.05e-139		THOC7	1.27e-50	0.293976	0.973	0.902	2.97e-46		USP44
HMGN5	7.28e-90	-0.494205	0.647	0.889	1.71e-85		TMEM14B	1.94e-45	0.29733	0.96	0.819	4.55e-41		COL2A1
CD9	7.19e-93	-0.493506	0.221	0.769	1.68e-88		CETN2	8.55e-48	0.297406	0.952	0.829	2e-43		SOX7
HNRNPU	3.9e-85	-0.487725	0.985	0.996	9.14e-81		MYL7	1.96e-148	0.297766	0.411	0.034	4.6e-144		PLBD1
MT-ATP6	1.65e-99	-0.487699	0.977	0.996	3.86e-95		PKIB	1.88e-44	0.298336	0.954	0.851	4.41e-40		CST1
UPF2	1.97e-99	-0.487227	0.791	0.958	4.61e-95		SEC61G	6.05e-72	0.298489	1	0.995	1.42e-67		NPY
GDF3	3.89e-54	-0.483436	0.033	0.406	9.12e-50		GPX4	4.53e-78	0.299166	1	0.992	1.06e-73		GATA3
LARS	3.22e-73	-0.483066	0.973	0.983	7.54e-69		RPS4X	1.96e-100	0.300385	1	1	4.6e-96		PRTG
SMARCC1	8.8e-99	-0.48197	0.896	0.972	2.06e-94		EXOSC8	4.76e-53	0.30144	0.975	0.909	1.11e-48		SELM
LINC00678	1.16e-77	-0.481863	0.067	0.551	2.72e-73		ATP5F1	4.19e-59	0.301493	0.998	0.939	9.82e-55		HIST1H4C
SERBP1	2.44e-126	-0.480074	0.998	1	5.71e-122		TPM1	4.77e-18	0.30198	0.99	0.985	1.12e-13		PALLD
TRIM71	1.12e-71	-0.479188	0.411	0.773	2.63e-67		PFN2	1.56e-44	0.302994	0.954	0.842	3.65e-40		HIST1H1D
CLDN7	8.52e-94	-0.477302	0.217	0.754	2e-89		C14orf1	2.53e-40	0.303773	0.967	0.819	5.93e-36		CUZD1
PTPRZ1	1.06e-59	-0.477222	0.134	0.538	2.48e-55		CXCR4	1.48e-22	0.304185	0.363	0.175	3.47e-18		KRT16
PLA2G2A	3.84e-33	-0.476047	0.09	0.372	9e-29		CITED2	2.32e-33	0.305423	0.906	0.763	5.43e-29		CRHBP
HNRNPAB	1.02e-93	-0.474608	0.948	0.987	2.38e-89		RHOBTB3	3.88e-32	0.305441	0.879	0.706	9.08e-28		CRYGS
WLS	2.88e-05	-0.473966	0.639	0.656	0.675422		FAM89A	3.31e-90	0.305453	0.585	0.179	7.75e-86		TRDN
HIST1H1D	8.57e-33	-0.472849	0.301	0.562	2.01e-28		SPARC	4.13e-37	0.305644	0.931	0.849	9.68e-33		FABP7
SMARCA5	6.58e-82	-0.468695	0.916	0.982	1.54e-77		CGNL1	1.49e-60	0.305674	0.603	0.272	3.5e-56		MYL7
KPNB1	1.13e-78	-0.467835	0.948	0.97	2.65e-74		PVRL2	1.37e-44	0.305731	0.85	0.644	3.2e-40		IFI16
DPYSL3	4.34e-77	-0.467041	0.238	0.669	1.02e-72		RP3-512B11.3	9.39e-99	0.308111	0.722	0.275	2.2e-94		LCP1
MT-ND1	1.05e-74	-0.465154	0.981	0.982	2.47e-70		DAB2	7.06e-81	0.309054	0.576	0.19	1.65e-76		CCDC80
EPAS1	1.54e-32	-0.463643	0.04	0.3	3.61e-28		CD24	6.42e-89	0.309296	0.994	0.303	1.5e-84		POLR3G
SOX2	1.27e-58	-0.461602	0.025	0.415	2.97e-54		SLC25A3	1.88e-68	0.315703	1	0.989	4.41e-64		ID2
MSH6	2.74e-83	-0.459784	0.693	0.899	6.42e-79		OST4	1.9e-75	0.316712	1	0.997	4.46e-71		CYP26A1
YTHDC1	5.73e-81	-0.456411	0.754	0.925	1.34e-76		ITM2C	8.27e-41	0.316731	0.977	0.883	1.94e-36		AHNAK
MT-ND3	2.61e-107	-0.454092	0.987	1	6.12e-103		MT1X	7.36e-33	0.317382	0.436	0.203	1.72e-28		SERPINE2
CENPF	1.23e-34	-0.453649	0.912	0.974	2.89e-30		ANGPT2	6.29e-165	0.318999	0.499	0.053	1.47e-160		MSX2
WIBG	1.98e-108	-0.452769	0	0.596	4.64e-104		TMEM14C	1.34e-68	0.319946	0.985	0.884	3.13e-64		MT2A
VCAN	5.43e-52	-0.448687	0.572	0.811	1.27e-47		FKBP1A	5.27e-55	0.320239	1	0.942	1.23e-50		FN1
TMBIM4.1	5.81e-107	-0.445665	0	0.591	1.36e-102		H2AFZ	6.02e-78	0.320464	1	0.997	1.41e-73		TBX3
RP11-149I23.3	1.06e-34	-0.444679	0.18	0.474	2.49e-30		IGF2	8.18e-149	0.321396	0.382	0.025	1.92e-144		FAM24B
DNMT3B	4.7e-84	-0.442099	0.292	0.716	1.1e-79		ATP5G2	1.4e-83	0.323491	1	0.994	3.28e-79		LGI1
HSPD1	8.6e-103	-0.4401	0.998	1	2.02e-98		SUMO2	3.25e-88	0.323815	1	0.99	7.6e-84		PCSK1N
WFDC2	9.27e-79	-0.439362	0.395	0.828	2.17e-74		MCTS1	1.18e-64	0.325809	0.954	0.789	2.76e-60		BAMBI
MT-CO1	1.01e-49	-0.434413	0.99	0.996	2.36e-45		SMIM10L1	2.66e-165	0.326452	0.781	0.147	6.22e-161		GLIPR2
IER3IP1.1	1.28e-105	-0.433937	0	0.586	3e-101		RPL29	3.52e-145	0.328081	1	1	8.24e-141		NEB
RRAS2	1.43e-76	-0.432853	0.628	0.841	3.36e-72		RAB34	1.19e-56	0.329026	0.967	0.813	2.79e-52		POSTN
CLTC	7.17e-62	-0.43275	0.797	0.921	1.68e-57		RALY	6.81e-60	0.329643	0.954	0.819	1.6e-55		RARRES2
SEPHS2	7.84e-114	-0.432114	0.027	0.635	1.84e-109		BOP1	2.12e-195	0.330013	0.656	0.082	4.96e-191		CXCL12
CNTNAP2	5.05e-29	-0.42951	0.787	0.864	1.18e-24		FAM213A	3.03e-45	0.333611	0.981	0.918	7.1e-41		CRYM
DDX46	6.3e-98	-0.428577	0.956	0.987	1.48e-93		COPE	1.34e-76	0.333928	0.994	0.943	3.13e-72		PPARG
FGFBP3	6.29e-54	-0.426639	0.132	0.516	1.47e-49		RCN2	6.42e-66	0.334153	0.985	0.948	1.5e-61		GCLM
ZC3H13	7.99e-81	-0.425469	0.841	0.94	1.87e-76		C1QBP	1.95e-53	0.334363	1	0.956	4.57e-49		ARHGAP29
RBM25	1.24e-95	-0.424899	0.916	0.973	2.91e-91		PGAM1	1.14e-76	0.336272	1	0.973	2.66e-72		GDF3
ABCF1	2.27e-80	-0.42434	0.95	0.981	5.31e-76		NKX2-5	5.82e-88	0.336417	0.438	0.093	1.36e-83		TSC22D1
RAD21	1.84e-73	-0.424291	0.883	0.969	4.31e-69		CHMP5	2.57e-61	0.336563	0.975	0.816	6.01e-57		PYDC1
DDX21	1.54e-63	-0.424233	0.931	0.971	3.6e-59		PRKCDBP	1.23e-60	0.336827	0.697	0.365	2.88e-56		LY6E
TAGLN2	3.88e-36	-0.423738	0.668	0.803	9.08e-32		ATG101	8.67e-212	0.338794	0.691	0.08	2.03e-207		ENC1
TAF15	3.37e-56	-0.422755	0.656	0.858	7.9e-52		CNIH1	9.65e-69	0.340144	0.946	0.72	2.26e-64		CDKN1C
SLC38A2	7.07e-58	-0.42247	0.624	0.84	1.66e-53		CREG1	8.8e-45	0.340235	0.743	0.48	2.06e-40		S100A11
SON	1.38e-102	-0.422364	0.996	0.999	3.23e-98		GPRC5C	9.25e-119	0.342701	0.528	0.111	2.17e-114		RP11-1144P22.1
C6orf211	8.79e-101	-0.422146	0	0.568	2.06e-96		GRAP2	1.83e-199	0.34274	0.526	0.044	4.29e-195		EZR
PWAR6	9.22e-84	-0.421107	0.282	0.708	2.16e-79		RBP1	3.37e-37	0.343792	0.954	0.82	7.89e-33		BMP4
DHCR24	9.9e-49	-0.419435	0.729	0.88	2.32e-44		GGH	1.98e-62	0.343925	0.902	0.641	4.64e-58		LBH
TRIM24	3.86e-61	-0.418873	0.493	0.78	9.04e-57		CCDC167	1.21e-65	0.344958	0.923	0.726	2.83e-61		CALB1
HIST1H1E	6.56e-15	-0.41784	0.173	0.325	1.54e-10		MLLT3	1.49e-112	0.345403	0.555	0.13	3.49e-108		MT1H
SRRM2	9.32e-59	-0.417589	0.954	0.987	2.18e-54		HOXB5	4.09e-179	0.347371	0.564	0.066	9.57e-175		CXCR4
CTC-260E6.6	1.84e-78	-0.416595	0.522	0.836	4.31e-74		CFAP97	1.5e-127	0.349011	0.8	0.199	3.53e-123		TERF1
C16orf80	5.91e-104	-0.415676	0	0.58	1.38e-99		NDUFB3	5.69e-80	0.349954	0.994	0.928	1.33e-75		WNT5A
ANKRD11	9.57e-67	-0.415587	0.557	0.83	2.24e-62		PKIG	6.68e-62	0.349969	0.904	0.683	1.57e-57		ID1
LBH	1.48e-15	-0.41457	0.624	0.707	3.47e-11		DUSP6	5.09e-59	0.350166	0.743	0.406	1.19e-54		PTGS2
MT-ND4	9.17e-86	-0.414415	0.981	0.998	2.15e-81		CRB2	1.38e-227	0.350674	0.501	0.023	3.23e-223		HOXC8
ZRANB2	9.58e-63	-0.412709	0.939	0.979	2.24e-58		ARHGAP29	1.6e-47	0.351029	0.85	0.585	3.76e-43		CENPE
DLGAP5	2.83e-28	-0.412295	0.645	0.863	6.62e-24		SRSF10	6.4e-74	0.351132	0.977	0.81	1.5e-69		PEG10
BEX2	2.03e-75	-0.411011	0.543	0.84	4.76e-71		NDUFA7	2.16e-172	0.35152	0.756	0.135	5.06e-168		LUM
TLE4	1.4e-06	-0.410305	0.795	0.813	0.0327455		RPL22L1	2.31e-29	0.352751	0.965	0.91	5.41e-25		NRK
PRKDC	5.05e-65	-0.410144	0.952	0.987	1.18e-60		TIMP1	1.75e-48	0.353413	0.919	0.783	4.09e-44		LZTS1
UCHL1	1.43e-56	-0.408328	0.954	0.962	3.34e-52		TAX1BP3	9.3e-67	0.354584	0.871	0.597	2.18e-62		LHX5
SYNE2	1.25e-60	-0.407862	0.449	0.782	2.93e-56		MANF	6.63e-50	0.354808	0.971	0.922	1.55e-45		NRP2
AIF1L	4.84e-63	-0.407735	0.603	0.851	1.13e-58		ARMT1	2.39e-113	0.354951	0.764	0.193	5.61e-109		PTN
CHD2	1.29e-94	-0.40711	0.269	0.733	3.03e-90		FXYD6	6.83e-61	0.355349	0.71	0.393	1.6e-56		EOMES
LINC00458	9.46e-31	-0.406996	0.159	0.436	2.22e-26		COL3A1	2.24e-195	0.355755	0.363	0.004	5.24e-191		SHISA3
SERPINE2	4.96e-32	-0.406457	0.733	0.886	1.16e-27		CYP27A1	8.8e-141	0.355759	0.608	0.127	2.06e-136		TMEM88
DSP	7.62e-25	-0.406319	0.737	0.854	1.79e-20		SSR2	1.98e-71	0.357467	0.987	0.952	4.63e-67		FST
RP11-345J4.5	1.63e-88	-0.406058	0.175	0.649	3.83e-84		KIFAP3	3.22e-80	0.357479	0.605	0.222	7.55e-76		PIM2
YWHAZ	2.37e-58	-0.405455	0.969	0.989	5.54e-54		PSMA1	2.99e-84	0.360132	0.996	0.935	7.01e-80		MYL9
MRPL23	2.59e-82	-0.403582	0.891	0.922	6.07e-78		RPSA	6e-195	0.36099	1	1	1.41e-190		RP11-85G21.3
LIN28A	9.37e-31	-0.401135	0.919	0.957	2.2e-26		LIX1	2.16e-50	0.361065	0.697	0.361	5.06e-46		SLC2A3
RTN3	1.33e-66	-0.400022	0.704	0.896	3.11e-62		COPS6	8.73e-72	0.361926	0.987	0.916	2.05e-67		NODAL
DST	3.42e-46	-0.399763	0.489	0.761	8.02e-42		SDHAF3	6.13e-259	0.361963	0.735	0.068	1.44e-254		CENPF
HSP90AB1	1.94e-98	-0.398732	1	1	4.55e-94		ZPR1	3.52e-219	0.362146	0.733	0.091	8.25e-215		MAFB
CCND2	1.47e-45	-0.398644	0.653	0.828	3.45e-41		TGFBI	5.37e-107	0.363556	0.388	0.056	1.26e-102		SGK1
EOMES	4.89e-51	-0.396846	0.15	0.524	1.15e-46		GLRX3	7.98e-83	0.364344	0.998	0.889	1.87e-78		UGP2
DDX17	1.47e-68	-0.395358	0.9	0.956	3.45e-64		CD151	4.01e-67	0.364681	0.9	0.645	9.4e-63		NANOS3
MYO10	2.68e-56	-0.395241	0.553	0.802	6.27e-52		LDHA	2.88e-50	0.366754	0.996	0.931	6.76e-46		CDH6
RP11-20D14.6	6.69e-85	-0.393788	0.18	0.672	1.57e-80		PSMB5	1.16e-106	0.369	1	0.989	2.72e-102		ANXA2
SLC3A2	8.2e-48	-0.393686	0.697	0.864	1.92e-43		CFL1	6.42e-123	0.369605	1	0.999	1.5e-118		LEFTY1
CDK11A	1.33e-82	-0.392755	0.507	0.808	3.1e-78		IGFBP4	5.58e-48	0.370344	0.724	0.496	1.31e-43		GLIPR1L1
CXADR	3.21e-67	-0.391191	0.718	0.913	7.52e-63		P3H2	6.64e-162	0.370778	0.712	0.125	1.56e-157		MT1E
APLP2	5.19e-68	-0.391074	0.921	0.974	1.21e-63		NNAT	1.61e-45	0.370836	0.752	0.491	3.78e-41		HOXC9
ANKRD32	2.65e-94	-0.390978	0	0.544	6.21e-90		KDR	3.83e-28	0.37165	0.749	0.619	8.98e-24		CCL2
XPO1	5.03e-64	-0.389797	0.724	0.89	1.18e-59		BIN1	5.35e-77	0.372183	0.775	0.446	1.25e-72		DLL3
HDGFRP3	1.06e-99	-0.388582	0	0.564	2.47e-95		SKP1	9.08e-133	0.377393	1	0.996	2.13e-128		CFH
NCKAP1	1.27e-50	-0.388266	0.516	0.762	2.98e-46		DAD1	2.04e-90	0.37861	0.998	0.945	4.79e-86		TRIM55
RAB3B	2.08e-47	-0.388211	0.273	0.647	4.87e-43		THUMPD3-AS1	2.19e-145	0.380724	0.837	0.196	5.13e-141		PLA2G16
ATP1A1	3.07e-56	-0.386951	0.704	0.87	7.18e-52		PGF	1.01e-110	0.381215	0.578	0.152	2.37e-106		ANXA3
ILF3	3.02e-69	-0.386554	0.954	0.978	7.09e-65		ZAP70	7.36e-256	0.382873	0.476	0.007	1.72e-251		PMP22
CDA	1.33e-64	-0.38441	0.121	0.546	3.12e-60		IDH2	8.68e-74	0.384023	0.933	0.691	2.03e-69		WNT2
TUBB2A	1.21e-24	-0.383439	0.908	0.902	2.84e-20		ESD	2.41e-79	0.387436	0.96	0.758	5.65e-75		CPE
NQO2	5.41e-33	-0.382759	0.812	0.846	1.27e-28		MRPL40	4.71e-86	0.389064	0.9	0.602	1.1e-81		CNKSR3
OCIAD2	5.62e-67	-0.382448	0.848	0.937	1.32e-62		EIF3E	1.01e-82	0.390293	1	0.956	2.37e-78		NEFM
HSPB1	5.86e-50	-0.38226	0.975	0.991	1.37e-45		THY1	9.55e-35	0.391039	0.818	0.678	2.24e-30		EPHB6
HIST1H4C	4.17e-25	-0.381679	0.814	0.903	9.77e-21		SLC9A3R1	7.12e-33	0.391575	0.827	0.696	1.67e-28		EDN1
RRBP1	3.12e-32	-0.3802	0.837	0.919	7.32e-28		IFITM3	7.61e-17	0.392036	0.994	0.979	1.78e-12		ABCG2
FUS	1.34e-88	-0.379894	0.987	0.996	3.14e-84		RBFA	3.03e-103	0.396907	0.791	0.385	7.11e-99		STOM
TCEAL4	3e-69	-0.379591	0.9	0.967	7.04e-65		CCDC80	6.52e-152	0.396966	0.553	0.084	1.53e-147		MT1G
ENAH	5.58e-54	-0.379342	0.779	0.897	1.31e-49		ANXA2	2.35e-51	0.397671	0.952	0.835	5.5e-47		TAGLN2
C21orf33	5.61e-96	-0.379128	0.023	0.569	1.32e-91		GTF3A	1.11e-74	0.401617	0.975	0.844	2.6e-70		MAP1B
PNN	9.59e-71	-0.378506	0.952	0.98	2.25e-66		HACD1	1.73e-271	0.404786	0.683	0.048	4.06e-267		ID3
NARS	1.13e-59	-0.37815	0.952	0.981	2.65e-55		PDLIM7	4.11e-83	0.405662	0.921	0.623	9.64e-79		ALDH1A2
WAPAL	1.14e-97	-0.376606	0	0.557	2.67e-93		SDCBP	2.48e-79	0.405754	0.975	0.796	5.81e-75		DIO2
MYSM1	2.07e-57	-0.376224	0.294	0.649	4.85e-53		KDELR2	1.17e-80	0.406936	0.965	0.824	2.74e-76		SLPI
PHGDH	1.17e-56	-0.375991	0.958	0.956	2.74e-52		APOC1	3.48e-53	0.408201	0.981	0.943	8.15e-49		S100Z
FAM159B	1.6e-40	-0.375973	0.628	0.828	3.74e-36		CDH11	6.6e-143	0.41061	0.72	0.187	1.55e-138		CTD-2035E11.4
SLC16A1	4.73e-62	-0.375893	0.699	0.865	1.11e-57		SNAI2	7.01e-108	0.414272	0.608	0.171	1.64e-103		C1orf105
IFITM1	1.12e-90	-0.375209	0.132	0.645	2.62e-86		FDPS	1.93e-75	0.419693	0.994	0.966	4.51e-71		FLRT3
RTN4	1.41e-59	-0.374201	0.935	0.978	3.31e-55		S100A4	4.35e-32	0.424886	0.71	0.518	1.02e-27		GADD45G
NDUFA7.1	4.4e-96	-0.373803	0	0.551	1.03e-91		ATP5C1	1.05e-102	0.427046	0.998	0.915	2.46e-98		PDK4
SESN3	1.53e-15	-0.372635	0.265	0.434	3.58e-11		URAD	1.59e-261	0.428789	0.491	0.008	3.73e-257		PTPRZ1
G3BP1	2.61e-59	-0.37147	0.86	0.939	6.11e-55		GABARAPL2	7.56e-94	0.42929	0.983	0.857	1.77e-89		RP11-357H14.17
PAK1	6.67e-63	-0.371463	0.574	0.819	1.56e-58		MYL12A	2.36e-102	0.441072	1	0.968	5.52e-98		HHEX
PPAP2C	1.48e-77	-0.371418	0	0.475	3.47e-73		SH3BGRL3	5.31e-85	0.446943	0.996	0.931	1.24e-80		SCGB3A2
ACIN1	2.27e-49	-0.370567	0.712	0.874	5.32e-45		OSTC	3.18e-104	0.448427	0.998	0.942	7.44e-100		BNIP3
SLC7A8	1.86e-64	-0.369795	0.213	0.643	4.36e-60		IFITM2	1.72e-60	0.448856	0.956	0.86	4.02e-56		GATA6
SUDS3	9.14e-65	-0.369255	0.722	0.899	2.14e-60		MSX1	8.6e-115	0.452759	0.781	0.279	2.02e-110		AURKA
LINC00657	4.16e-40	-0.368891	0.545	0.758	9.74e-36		RHOC	1.24e-98	0.457967	0.979	0.799	2.9e-94		CTHRC1
EIF5B	5.02e-81	-0.368617	0.998	0.997	1.18e-76		IFT22	1.4e-263	0.460757	0.772	0.082	3.28e-259		HTRA1
TBCA	1.05e-31	-0.368182	1	0.999	2.45e-27		CLIC1	6.9e-81	0.461143	0.99	0.966	1.62e-76		MSX1
HLA-C	1.18e-56	-0.367041	0.747	0.878	2.76e-52		UBE2E3	1.98e-89	0.462834	0.985	0.883	4.63e-85		MDK
FAM162A	1.01e-59	-0.366707	0.595	0.833	2.37e-55		TMEM141	9.09e-67	0.4688	0.906	0.706	2.13e-62		RGS16
PCM1	2.19e-51	-0.36627	0.82	0.935	5.12e-47		C4orf48	1.08e-85	0.470691	0.977	0.899	2.53e-81		ASRGL1
FCF1	8.31e-72	-0.366072	0.622	0.83	1.95e-67		BTF3	5.25e-102	0.475403	1	0.989	1.23e-97		ITGA2
PBX1	7.39e-52	-0.366015	0.493	0.762	1.73e-47		SVBP	1.19e-240	0.475671	0.825	0.12	2.8e-236		LINC00678
NUFIP2	1.76e-43	-0.365738	0.47	0.707	4.11e-39		IFI16	9.82e-48	0.475943	0.699	0.384	2.3e-43		S100A3
HSD17B4	1.71e-57	-0.365345	0.793	0.914	4.01e-53		RPL10	3.44e-214	0.482203	1	1	8.06e-210		RAB15
DNMT1	1.76e-62	-0.365016	0.933	0.975	4.12e-58		PKM	5.81e-82	0.483254	0.998	0.986	1.36e-77		RHOB
ATPIF1	1.36e-89	-0.364927	1	1	3.18e-85		VAMP5	1.45e-117	0.487004	0.754	0.291	3.4e-113		S100A6
KDM5B	7.25e-63	-0.364918	0.722	0.9	1.7e-58		UQCC3	2.22e-180	0.49631	0.889	0.198	5.2e-176		PRKAR2B
PUM1	7.04e-65	-0.363212	0.489	0.799	1.65e-60		RGS4	2.22e-220	0.497814	0.52	0.031	5.2e-216		S100A4
TFAP2A	1.91e-53	-0.362933	0.084	0.468	4.48e-49		KRT19	1.33e-68	0.504619	0.975	0.918	3.11e-64		ITM2B
APP	8.78e-57	-0.362528	0.779	0.913	2.06e-52		TPM2	6.07e-112	0.504925	0.996	0.968	1.42e-107		SERPINB9
ZIC2	3.84e-76	-0.362513	0.056	0.526	8.99e-72		BAMBI	2.04e-71	0.511201	0.935	0.784	4.79e-67		PRSS23
C11orf83	2.14e-90	-0.360628	0	0.528	5.02e-86		ARPC2	3.63e-133	0.516053	0.998	0.956	8.51e-129		ANXA4
NPM3	1.33e-43	-0.359658	0.898	0.888	3.12e-39		PAPSS1	3.5e-71	0.522303	0.883	0.666	8.2e-67		DMD
HMGB3	8.71e-73	-0.358515	0.996	0.997	2.04e-68		HAS2	1.87e-56	0.528655	0.881	0.619	4.38e-52		CNTNAP2
VRTN	1.31e-72	-0.357943	0.194	0.656	3.06e-68		LSM8	5.07e-147	0.529171	0.969	0.266	1.19e-142		KPNA2
RANBP2	2.37e-50	-0.357793	0.555	0.794	5.56e-46		IER3IP1	3.41e-238	0.531141	0.862	0.147	7.98e-234		NANOG
AP1M2	1.35e-72	-0.357676	0.278	0.76	3.16e-68		FAAP20	2.1e-149	0.534494	0.965	0.264	4.92e-145		FREM1
SLC7A5	1.72e-46	-0.357484	0.263	0.604	4.02e-42		DNAJC15	3.72e-85	0.53718	0.948	0.748	8.7e-81		PPP1R17
ERICH1	4.13e-63	-0.356461	0.714	0.888	9.68e-59		CFAP20	0	0.539147	0.841	0.083	0		TBCA
CDYL	1.59e-76	-0.355591	0.251	0.675	3.73e-72		SUB1	3.29e-158	0.541925	1	0.992	7.71e-154		SIX6
LIMA1	4.74e-38	-0.355219	0.486	0.726	1.11e-33		TAGLN	2.05e-35	0.542085	0.664	0.42	4.81e-31		CALD1
STRBP	1e-66	-0.355012	0.39	0.747	2.34e-62		HOXB2	9.82e-218	0.553506	0.735	0.113	2.3e-213		IER3
COCH	2.06e-55	-0.354023	0.276	0.638	4.84e-51		ALDH2	1.26e-120	0.56211	0.858	0.484	2.96e-116		ARL4D
SHOC2	2.68e-33	-0.354012	0.484	0.694	6.27e-29		PHLDA1	8.16e-72	0.568916	0.766	0.444	1.91e-67		AK4
TRDN	2.02e-27	-0.351972	0.188	0.44	4.74e-23		TMBIM4	0	0.569916	0.85	0.075	0		CCNG2
HSP90B1	3.55e-46	-0.351299	0.979	0.998	8.33e-42		EMP3	3.04e-108	0.579933	0.683	0.271	7.13e-104		T
IQGAP1	7.61e-54	-0.350874	0.466	0.762	1.78e-49		TUBB6	1.73e-97	0.582954	0.814	0.488	4.06e-93		GSTO1
PAWR	4.58e-67	-0.350262	0.407	0.756	1.07e-62		IDI1	4.41e-111	0.587916	0.979	0.819	1.03e-106		ADM
RP4-792G4.2	2.18e-54	-0.350058	0	0.365	5.12e-50		MRPL57	2.61e-145	0.591106	0.992	0.281	6.12e-141		CYR61
PSME1	3.29e-64	-0.349136	0.789	0.899	7.72e-60		MEST	7.12e-74	0.602227	0.929	0.765	1.67e-69		TDGF1
MIF	3.6e-46	-0.348316	0.975	0.981	8.44e-42		GNG11	2.67e-133	0.608099	0.603	0.143	6.24e-129		PODXL
ARGLU1	1.53e-54	-0.347586	0.942	0.977	3.58e-50		RPS4Y1	3.33e-42	0.612883	0.766	0.62	7.8e-38		DPPA4
SETD5-AS1	7.03e-89	-0.34577	0	0.522	1.65e-84		CDX2	8.63e-123	0.621617	0.71	0.242	2.02e-118		SNAI2
DHX36	1.09e-58	-0.345727	0.887	0.959	2.54e-54		MAGED2	9.24e-122	0.62689	0.996	0.921	2.16e-117		URAD
CHD4	2.64e-49	-0.344636	0.864	0.949	6.2e-45		AK6	1.39e-297	0.628255	0.887	0.116	3.25e-293		CDH11
RPL17	4.61e-39	-0.344048	0.994	0.918	1.08e-34		MLLT11	2.04e-110	0.638808	0.979	0.84	4.77e-106		CDK1
PTPRF	5.45e-62	-0.34322	0.278	0.663	1.28e-57		RGS2	5.07e-74	0.639793	0.685	0.358	1.19e-69		NMU
CANX	3.47e-41	-0.341896	0.912	0.962	8.12e-37		MDK	4.44e-114	0.644762	1	0.997	1.04e-109		FOXA2
U2SURP	4.21e-56	-0.341326	0.948	0.973	9.86e-52		LINC01420	4.32e-206	0.647067	0.96	0.232	1.01e-201		PRDM1
ZMAT2	1.21e-60	-0.33963	0.866	0.957	2.83e-56		S100A13	3.5e-91	0.655572	0.967	0.878	8.2e-87		ACPP
SOX17	2.26e-24	-0.339586	0.136	0.406	5.29e-20		MYL9	5.71e-91	0.659924	0.96	0.736	1.34e-86		TMEM37
SLTM	6.66e-59	-0.338988	0.965	0.987	1.56e-54		FAM195B	3.07e-237	0.668732	0.939	0.234	7.2e-233		DMRTA2
BCLAF1	1.95e-55	-0.338769	0.929	0.958	4.56e-51		PRRX1	1.15e-275	0.683314	0.628	0.036	2.68e-271		ITGAV
FBL	6.36e-77	-0.337978	0.973	0.986	1.49e-72		HACD3	1.1e-179	0.69264	0.962	0.264	2.57e-175		PLK2
TAOK1	5.63e-44	-0.337974	0.365	0.648	1.32e-39		ID3	3.15e-80	0.697519	0.992	0.944	7.38e-76		KDR
RBPJ	1.14e-55	-0.337383	0.866	0.948	2.67e-51		TMSB10	3.18e-182	0.709469	1	1	7.44e-178		CRYAB
HERC2	1.05e-52	-0.337314	0.582	0.806	2.47e-48		TFPI	5.62e-104	0.710392	0.668	0.232	1.32e-99		HOXA9
TPD52	1.19e-73	-0.336997	0.211	0.709	2.78e-69		CD99	1.55e-89	0.712186	0.927	0.811	3.63e-85		OLFML3
PRPF4B	3.39e-46	-0.336824	0.929	0.973	7.93e-42		TUBA1A	2.9e-79	0.715812	0.996	0.973	6.79e-75		GABRB2
CLINT1	3.02e-52	-0.336796	0.61	0.834	7.07e-48		S100A11	6.76e-83	0.724017	0.998	0.999	1.58e-78		PCDH17
RP11-386G11.10	9.19e-72	-0.336058	0.167	0.592	2.15e-67		HOXB6	4.15e-166	0.726363	0.699	0.149	9.72e-162		SVIP
POU5F1B	2.86e-60	-0.335563	0.211	0.634	6.69e-56		ID2	4.33e-62	0.728615	0.96	0.905	1.02e-57		EFNA1
USP34	3.88e-41	-0.334888	0.497	0.747	9.09e-37		GLRX	6.32e-105	0.742829	0.86	0.55	1.48e-100		SPRY1
ZNF259	1.53e-92	-0.333628	0	0.537	3.58e-88		SARAF	4.12e-265	0.747781	0.95	0.19	9.66e-261		VCAN
DBI	0.857773	-0.332561	1	1	1		NDUFB8	7.78e-152	0.76244	0.998	0.3	1.82e-147		TMPRSS11E
GOLGB1	2.86e-33	-0.331251	0.676	0.836	6.71e-29		ACAT2	1.43e-132	0.782309	0.998	0.933	3.35e-128		CXCL1
SUPT16H	6.83e-46	-0.330882	0.985	0.992	1.6e-41		S100A10	3.09e-73	0.804671	0.944	0.804	7.25e-69		CBR1
CCDC23	5.26e-91	-0.329922	0	0.531	1.23e-86		UQCR11	7.25e-141	0.818228	1	0.302	1.7e-136		GSTA1
PGM1	4.41e-35	-0.329094	0.522	0.725	1.03e-30		TMEM98	1.27e-171	0.82285	0.971	0.678	2.98e-167		HEY1
CNOT1	1.27e-27	-0.328883	0.582	0.752	2.96e-23		HOXB-AS3	3.66e-221	0.843969	0.507	0.027	8.57e-217		RGS4
IVNS1ABP	4.92e-37	-0.328454	0.718	0.855	1.15e-32		HAND1	6.12e-86	0.851764	0.831	0.532	1.43e-81		SAMD3
KPNA4	5.41e-50	-0.328144	0.434	0.737	1.27e-45		BMP4	4.29e-138	0.853374	0.808	0.352	1.01e-133		LPAR4
CBX5	1.66e-18	-0.327653	0.983	0.988	3.9e-14		KRT8	1.76e-99	0.882508	0.994	0.955	4.12e-95		MYL4
UPF3B	1.92e-54	-0.32645	0.806	0.888	4.51e-50		SNU13	7.76e-205	0.903366	0.996	0.286	1.82e-200		TFAP2A
GS1-251I9.4	2.12e-85	-0.325913	0	0.508	4.97e-81		GYPC	1.11e-190	0.931	0.969	0.604	2.6e-186		MOBP
GNAS	9.6e-67	-0.325697	0.979	0.99	2.25e-62		SNX3	6.18e-127	0.939657	0.983	0.848	1.45e-122		FAM65B
DIO3	1.4e-19	-0.325077	0.086	0.277	3.29e-15		CYB5A	1.33e-59	0.957352	0.962	0.835	3.13e-55		MTUS2
EIF4G1	6.66e-45	-0.324239	0.791	0.898	1.56e-40		SNRPN	2.22e-203	0.971953	0.998	0.65	5.2e-199		SPP1
CBR1	1.66e-37	-0.323685	0.261	0.532	3.88e-33		SF3B6	6.62e-235	1.00368	1	0.288	1.55e-230		WFDC2
MKI67	1.32e-25	-0.323545	0.595	0.774	3.09e-21		SNHG25	0	1.01552	0.962	0.124	0		GMPR
CCAR1	7.94e-53	-0.323159	0.843	0.928	1.86e-48		MYDGF	0	1.02806	0.969	0.186	0		CDA
RYBP	7.68e-42	-0.322546	0.451	0.704	1.8e-37		DOK4	9.39e-124	1.04924	0.841	0.434	2.2e-119		PAX6
FERMT2	7.01e-28	-0.322498	0.783	0.872	1.64e-23		KRT18	2.71e-106	1.05513	1	0.966	6.35e-102		DUSP6
C10orf118	1.74e-86	-0.32192	0	0.513	4.09e-82		NPY	3.57e-117	1.09094	0.582	0.153	8.37e-113		SPINK1
MYEF2	1.02e-62	-0.320928	0.223	0.638	2.39e-58		RPS17	6.07e-132	1.14032	1	0.697	1.42e-127		LRRN1
RBM39	8.26e-57	-0.320688	0.975	0.993	1.93e-52		MYL4	1.04e-301	1.14302	0.633	0.028	2.44e-297		TUBB2B
CTSC	4.12e-41	-0.320018	0.823	0.886	9.66e-37		ACTC1	5.81e-64	1.18231	0.831	0.642	1.36e-59		C1orf56
TM9SF3	1.45e-29	-0.319999	0.658	0.794	3.39e-25		LUM	1.9e-240	1.32119	0.557	0.034	4.44e-236		RP11-267L5.1
ACO1	1.25e-33	-0.318206	0.355	0.604	2.93e-29		CRABP2	1.34e-172	1.38743	0.971	0.89	3.14e-168		CYB5A
MSH2	2.6e-49	-0.317936	0.71	0.878	6.09e-45		PMP22	1.38e-256	1.38811	0.752	0.109	3.23e-252		CDH1
CDV3	6.75e-49	-0.317864	0.493	0.747	1.58e-44		RGS5	5.62e-136	1.41754	0.814	0.363	1.32e-131		TRPA1
TCOF1	8.97e-40	-0.317776	0.553	0.763	2.1e-35		VIM	5.85e-162	1.47198	0.967	0.766	1.37e-157		BMP2
PCBP2	1.08e-67	-0.317426	0.981	0.985	2.54e-63		PSMA2	0	1.55122	0.998	0.245	0		DDX58
ALDH3A2	3.99e-51	-0.316866	0.29	0.619	9.34e-47		TMEM88	0	1.72053	0.772	0.066	0		HVCN1
LUC7L3	8.79e-63	-0.316814	0.958	0.979	2.06e-58		HAPLN1	5.55e-146	1.98204	0.896	0.493	1.3e-141		CA2
DENR	6.13e-42	-0.316411	0.939	0.975	1.44e-37									CAMK2N1
CLIC4	9.37e-45	-0.31585	0.718	0.856	2.19e-40									DDIT4
ASPM	4.1e-30	-0.315744	0.559	0.758	9.6e-26									DDT
SFRP1	1.3e-23	-0.315692	0.175	0.395	3.04e-19									TBX6
PTP4A2	4.86e-46	-0.315283	0.714	0.869	1.14e-41									COCH
GGCT	2.85e-44	-0.315199	0.904	0.926	6.68e-40									PYCARD
CELF1	5.09e-33	-0.315143	0.645	0.8	1.19e-28									MRS2
TARS	4.56e-43	-0.313541	0.902	0.937	1.07e-38									TCEA1
UBE2K	3.88e-37	-0.313127	0.904	0.946	9.09e-33									CHST9
SLC4A7	9.17e-42	-0.312904	0.526	0.748	2.15e-37									TLE4
NANOG	1.17e-56	-0.312692	0.084	0.512	2.75e-52									CBR3
NIPBL	3.59e-44	-0.312154	0.582	0.779	8.41e-40									PGM1
ARID1A	5.87e-47	-0.312117	0.474	0.728	1.38e-42									SPNS2
SNURF.1	3.29e-78	-0.311389	0	0.478	7.71e-74									MKI67
FAM136A	2.67e-49	-0.310996	0.937	0.96	6.26e-45									TACR1
RNMT	3.95e-45	-0.31096	0.862	0.92	9.25e-41									KLHDC8A
KIAA1430	1.11e-86	-0.310399	0	0.514	2.59e-82									TUBA1A
MT-ATP8	1.77e-69	-0.309593	0.144	0.577	4.14e-65									PDGFRA
LRRN1	2.77e-35	-0.309403	0.173	0.472	6.49e-31									SMARCA2
JMJD1C	3.47e-44	-0.309175	0.597	0.787	8.12e-40									H2AFJ
AKAP9	1.56e-41	-0.309069	0.791	0.914	3.65e-37									RPL22L1
ACVR2B	2.21e-45	-0.308914	0.349	0.654	5.19e-41									CALB2
SRRM1	2.08e-50	-0.308549	0.994	0.996	4.87e-46									RAB11FIP1
BDP1	1.73e-47	-0.307194	0.614	0.824	4.04e-43									LPL
SOCS4	1.34e-28	-0.306928	0.37	0.615	3.14e-24									SYT1
TOP1	1.09e-48	-0.306754	0.939	0.978	2.56e-44									SFRP2
HUWE1	1.37e-36	-0.306518	0.601	0.772	3.21e-32									DEPDC1
TET1	1.31e-36	-0.305828	0.724	0.856	3.08e-32									PMAIP1
USP9X	6.52e-47	-0.305692	0.359	0.664	1.53e-42									GAS1
SLC25A13	7.34e-50	-0.305266	0.624	0.824	1.72e-45									GAP43
TDG	1.88e-44	-0.305224	0.902	0.961	4.4e-40									C9orf135
ZFP42	3.23e-49	-0.304777	0.587	0.837	7.57e-45									CTB-158E9.1
C12orf44	1.03e-84	-0.304688	0	0.505	2.41e-80									ASPM
MFGE8	1.8e-41	-0.304473	0.628	0.799	4.23e-37									PPFIBP2
DESI2	1.1e-47	-0.304471	0.576	0.798	2.58e-43									MAB21L2
UBE2V1	1.91e-11	-0.303716	0.359	0.471	4.47e-07									DPYSL3
PABPC1	2.72e-42	-0.303585	1	0.997	6.36e-38									KALRN
MIER1	1.04e-43	-0.303526	0.603	0.822	2.43e-39									MAGI3
TCF4	3.19e-19	-0.303369	0.685	0.792	7.46e-15									NUSAP1
TOP2A	1.18e-17	-0.303044	0.781	0.907	2.76e-13									CST4
RP11-344E13.3	1.29e-81	-0.302757	0	0.493	3.02e-77									DLGAP5
IPO5	9.15e-39	-0.301849	0.816	0.901	2.14e-34									SPATS2L
ASNS	1.42e-45	-0.301322	0.52	0.768	3.32e-41									ZFHX3
ADSS	2e-38	-0.301239	0.685	0.814	4.69e-34									PPEF1
ITM2B	2.34e-17	-0.300717	0.969	0.96	5.48e-13									SOX15
ITGB5	5.34e-38	-0.29924	0.418	0.67	1.25e-33									CCBE1
OAZ2	7.49e-31	-0.299218	0.933	0.907	1.75e-26									LOXL1
TOP2B	1.49e-29	-0.297538	0.622	0.771	3.5e-25									C11orf96
KIF21A	4.22e-56	-0.297345	0.23	0.602	9.88e-52									NQO2
PDPN	4.33e-57	-0.296828	0.299	0.719	1.02e-52									HAND2
PIM2	1.13e-43	-0.296641	0.18	0.539	2.64e-39									RAB3B
ZNF326	7.35e-51	-0.29637	0.693	0.847	1.72e-46									MFAP4
PTBP3	5.12e-38	-0.296293	0.403	0.674	1.2e-33									CTGF
MSX2	5.74e-08	-0.296051	0.493	0.558	0.00134374									DSP
BOD1L1	1.24e-48	-0.29579	0.39	0.688	2.89e-44									GATA3-AS1
APPL1	3.26e-47	-0.295536	0.484	0.74	7.63e-43									PRSS12
PRKCI	6.96e-53	-0.295155	0.351	0.676	1.63e-48									PTHLH
KNOP1	2.56e-44	-0.294935	0.979	0.974	5.99e-40									SYT4
DICER1	4.55e-35	-0.294509	0.47	0.703	1.07e-30									PLSCR2
TPR	8.03e-45	-0.294336	0.979	0.988	1.88e-40									HOXB-AS1
RIF1	1.21e-36	-0.294148	0.62	0.802	2.83e-32									TTC29
PYCARD	3.52e-47	-0.294062	0.428	0.786	8.24e-43									PAX3
TRIM28	2e-38	-0.293925	0.912	0.947	4.68e-34									ADAMTS9
IPO7	4.45e-25	-0.2939	0.758	0.86	1.04e-20									NPPB
HYOU1	2.21e-15	-0.29316	0.501	0.632	5.18e-11									C1orf61
ROMO1	2.51e-53	-0.293046	0.996	0.996	5.88e-49									APOBEC3G
PNISR	8.19e-49	-0.292881	0.95	0.972	1.92e-44									COLEC12
USP48	2.57e-51	-0.292845	0.557	0.779	6.01e-47									HOTAIRM1
KIF1A	5.12e-65	-0.292761	0.098	0.539	1.2e-60									PTS
ELF2	4.89e-51	-0.292686	0.397	0.689	1.14e-46									DACH1
RALBP1	1.48e-38	-0.292464	0.772	0.895	3.47e-34									TAC1
SCD	2.5e-19	-0.29236	0.921	0.949	5.86e-15									CRABP2
MARCKS	1.56e-31	-0.292276	0.848	0.924	3.65e-27									SSTR2
LAMC1	1.18e-31	-0.291397	0.459	0.676	2.77e-27									SLCO2A1
EPRS	2.02e-43	-0.290353	0.802	0.909	4.74e-39									CCNB1
QSER1	1.46e-36	-0.29016	0.466	0.691	3.41e-32									ATOH8
CARHSP1	1.12e-51	-0.289688	0.948	0.983	2.62e-47									BEX1
SPTBN1	2.12e-24	-0.289673	0.658	0.778	4.96e-20									CEBPD
UBR5	2.19e-46	-0.289615	0.347	0.651	5.13e-42									LGALS1
TNRC6B	4.9e-35	-0.28903	0.772	0.89	1.15e-30									MAP2
SEPHS1	7.25e-41	-0.28867	0.693	0.814	1.7e-36									COL6A3
PTN	1.83e-25	-0.287999	0.668	0.799	4.3e-21									MEIS1
COX6A1P2	2.02e-84	-0.287691	0	0.504	4.74e-80									PCDH10
TOMM7	3.27e-42	-0.28675	1	0.998	7.65e-38									PPP2R2B
RBBP4	7.76e-46	-0.286728	0.927	0.967	1.82e-41									PCDH19
CFDP1	4.1e-46	-0.286506	0.956	0.98	9.6e-42									RP11-788H18.1
SF3B1	1.29e-29	-0.286064	0.969	0.976	3.01e-25									HOXA10
TJP1	4.99e-41	-0.285484	0.676	0.838	1.17e-36									STC1
MAD2L2	9.42e-35	-0.285278	0.889	0.874	2.21e-30									C5orf30
KIAA0947	1.01e-76	-0.28517	0	0.472	2.38e-72									MGST2
PPAP2A	2.68e-57	-0.284835	0	0.38	6.28e-53									ERRFI1
G2E3	1.75e-28	-0.284148	0.637	0.79	4.1e-24									FOXC1
SCGB3A2	3.51e-37	-0.283978	0.157	0.48	8.22e-33									AC004540.4
SMC1A	6.2e-30	-0.283652	0.871	0.935	1.45e-25									APOL3
PPAPDC1B	1.98e-79	-0.283444	0	0.483	4.64e-75									ERMN
KAT7	3.7e-49	-0.282268	0.313	0.65	8.66e-45									PDCD4
LEPREL1	2.75e-68	-0.282035	0	0.434	6.45e-64									RND3
HPGD	6.79e-25	-0.281632	0.115	0.371	1.59e-20									RFPL1
FGF17	9.31e-19	-0.281597	0.134	0.329	2.18e-14									DSTN
PTPN11	6.52e-33	-0.28141	0.58	0.765	1.53e-28									SLITRK6
SMAD5	8.35e-38	-0.2813	0.436	0.689	1.96e-33									ZAP70
AK4	4.77e-39	-0.281161	0.161	0.47	1.12e-34									RGS13
HDGF	4.19e-38	-0.280864	0.735	0.874	9.81e-34									ITGA6
LMO4	7.98e-32	-0.280542	0.555	0.757	1.87e-27									CA12
ZNF770	1.99e-37	-0.280502	0.574	0.769	4.67e-33									CCPG1
KHDRBS1	3.4e-45	-0.280061	0.931	0.964	7.96e-41									HOXA1
RAB13	1.4e-37	-0.27999	0.946	0.939	3.28e-33									YPEL2
PPP1R3B	1.57e-46	-0.279632	0.221	0.566	3.67e-42									LINC00643
AZIN1	4.86e-34	-0.278832	0.635	0.803	1.14e-29									COL11A1
MIR205HG	6.83e-48	-0.278661	0	0.331	1.6e-43									DNAJC1
MAP1B	4.9e-11	-0.278621	0.969	0.971	1.15e-06									PLK1
NLN	1.42e-38	-0.278421	0.545	0.749	3.33e-34									C1orf21
MGEA5	3.96e-42	-0.278364	0.43	0.705	9.28e-38									CAV2
RAB25	7.25e-55	-0.278063	0.188	0.604	1.7e-50									SUCO
TTF2	2.48e-41	-0.277935	0.503	0.733	5.82e-37									ADAMTS6
PBRM1	7.55e-37	-0.277809	0.597	0.758	1.77e-32									DUSP2
ATXN7L3B	6.51e-27	-0.277634	0.507	0.682	1.53e-22									CEBPZ
LECT1	6.23e-46	-0.277287	0.079	0.419	1.46e-41									CHRNA3
FEZ1	1.83e-39	-0.276435	0.161	0.48	4.29e-35									HIST1H1C
ZMYM2	3.25e-26	-0.275651	0.559	0.736	7.61e-22									TPX2
SACS	3.08e-20	-0.275648	0.317	0.514	7.21e-16									FREM2
HIST1H1C	1.18e-17	-0.275465	0.403	0.569	2.75e-13									EMX2OS
ZNF207	1.35e-40	-0.274391	0.956	0.975	3.16e-36									TUBB2A
MESDC2	8.92e-15	-0.274247	0.921	0.936	2.09e-10									GREM1
IGF2BP2	6.06e-25	-0.273876	0.754	0.846	1.42e-20									MESDC2
PCDH10	1.95e-27	-0.273825	0.225	0.477	4.57e-23									L1TD1
PCBP1	3.74e-50	-0.272955	0.965	0.962	8.77e-46									HOXB5
BRD4	2.38e-34	-0.272908	0.593	0.781	5.58e-30									DHRS2
ETV1	5.51e-42	-0.272884	0.219	0.544	1.29e-37									LIFR
TMPO	6.98e-31	-0.27278	0.802	0.89	1.64e-26									CLSTN2
CTBP2	6.51e-37	-0.272723	0.685	0.821	1.52e-32									ZEB2
ESRP1	5.82e-57	-0.272203	0.146	0.569	1.36e-52									DSEL
CHMP2B	2.37e-46	-0.272086	0.735	0.865	5.55e-42									SLC7A5
CKAP2	4.73e-21	-0.270891	0.722	0.827	1.11e-16									ADAMTS18
DIAPH2	3.49e-33	-0.270429	0.349	0.604	8.17e-29									EGLN3
RNF187	3.93e-34	-0.269759	0.683	0.789	9.22e-30									ENPEP
RAB11FIP1	5.41e-31	-0.269508	0.18	0.446	1.27e-26									CCND2
MRPS17.1	1.12e-78	-0.268942	0	0.48	2.62e-74									SRY
MLLT4	1.52e-39	-0.268864	0.497	0.735	3.57e-35									VTCN1
ASCC3	2.5e-37	-0.268494	0.514	0.724	5.86e-33									CGA
MCM3	3.06e-33	-0.267392	0.894	0.939	7.17e-29									PRC1
RAD50	1.31e-36	-0.267276	0.683	0.83	3.08e-32									HMMR
XRCC5	6.53e-60	-0.267185	0.998	0.998	1.53e-55									ZIC1
WASL	1.83e-37	-0.26717	0.311	0.598	4.29e-33									IRX3
SUPT5H	4.94e-32	-0.267133	0.463	0.692	1.16e-27									AVP
RBM26	1.77e-34	-0.267121	0.507	0.722	4.15e-30									SPIN4
PPP2R2A	3.3e-40	-0.266879	0.749	0.865	7.74e-36									NUDT4
NDUFB4	2.44e-61	-0.266727	1	0.998	5.72e-57									MPC2
PSAP	2.28e-41	-0.266439	0.883	0.939	5.35e-37									PGF
LMNB1	4.06e-31	-0.266296	0.585	0.762	9.51e-27									ID4
PRPF6	7.7e-37	-0.266296	0.764	0.878	1.8e-32									TMOD1
QKI	3.49e-30	-0.266167	0.491	0.697	8.17e-26									RCSD1
DNAJC21	1.16e-49	-0.265642	0.376	0.682	2.72e-45									EDNRB
MFAP4	2.47e-21	-0.265256	0.261	0.471	5.78e-17									CITED2
ZNF638	1.85e-31	-0.264373	0.756	0.87	4.33e-27									LRRC23
CCDC104	2.44e-75	-0.263493	0	0.465	5.71e-71									LRRC32
VAT1	3.75e-43	-0.263377	0.562	0.781	8.78e-39									HOXA7
NR6A1	2.91e-32	-0.26285	0.564	0.753	6.83e-28									MMD
C17orf85	1.62e-74	-0.262431	0	0.462	3.79e-70									DNMT3B
BUB1B	7.57e-37	-0.262318	0.386	0.653	1.77e-32									FEZ1
CWF19L2	1.88e-29	-0.262148	0.818	0.92	4.42e-25									AIF1L
TBL1XR1	5.2e-31	-0.262081	0.505	0.722	1.22e-26									CALCR
GSTT1	1.25e-76	-0.261307	0	0.471	2.94e-72									TCEAL5
FAM133B	1.9e-36	-0.2612	0.937	0.966	4.46e-32									BCYRN1
CDC5L	2.03e-40	-0.261149	0.837	0.902	4.76e-36									LIMA1
GABRB3	2.33e-55	-0.261041	0.094	0.484	5.46e-51									PIFO
TEAD1	1.26e-35	-0.260772	0.276	0.556	2.95e-31									SPATA16
TLE1	1.13e-56	-0.260527	0.154	0.556	2.64e-52									PTGR1
ZFP36L1	6.06e-26	-0.260432	0.518	0.688	1.42e-21									ARHGAP24
YY1	3.74e-34	-0.260429	0.768	0.859	8.75e-30									MANBA
EPB41	9.47e-43	-0.260193	0.395	0.674	2.22e-38									GATA2
RCC2	3.72e-34	-0.260057	0.626	0.794	8.72e-30									CEBPA
ITGB1	1.97e-12	-0.259944	0.95	0.976	4.61e-08									PIF1
TMEM54	3.42e-11	-0.259777	0.28	0.407	8e-07									NPC2
TMOD3	5.02e-26	-0.259729	0.668	0.8	1.18e-21									NR2F1
CCDC6	2.26e-33	-0.259315	0.336	0.598	5.3e-29									RAMP1
F11R	9.59e-50	-0.259182	0.182	0.568	2.25e-45									AP000688.29
ARFGEF1	1.56e-34	-0.258776	0.347	0.612	3.65e-30									HLA-DQB1
TPX2	1.4e-20	-0.258752	0.626	0.791	3.27e-16									SOX9
MARCKSL1	4.36e-33	-0.258644	0.998	0.993	1.02e-28									AMOT
TP53BP1	3.18e-29	-0.258067	0.407	0.636	7.46e-25									OTX2
CYP26A1	1.04e-30	-0.257943	0.048	0.307	2.43e-26									GJA4
SPAG9	7.8e-40	-0.257646	0.357	0.633	1.83e-35									GDPD2
NOP58	5.54e-34	-0.257427	0.929	0.945	1.3e-29									GNB4
ENC1	2.84e-13	-0.257071	0.376	0.539	6.66e-09									ZIC2
KIF2A	5e-35	-0.256927	0.658	0.811	1.17e-30									SST
MIDN	2.27e-35	-0.256822	0.399	0.65	5.33e-31									CDX2
VSNL1	8.53e-50	-0.256821	0.077	0.448	2e-45									HOXB7
YBX3	3.61e-30	-0.256756	0.864	0.894	8.47e-26									POU5F1
GOT2	5.03e-36	-0.256735	0.53	0.732	1.18e-31									IRX1
GABARAPL1	1.51e-39	-0.25635	0.33	0.623	3.54e-35									KIF5B
MLEC	1.56e-36	-0.256107	0.944	0.96	3.66e-32									PSTPIP2
STAG2	3.3e-31	-0.255883	0.77	0.873	7.73e-27									SOWAHA
RBMS1	1.25e-17	-0.255618	0.72	0.797	2.93e-13									MEIS3
ZC3HAV1	1.19e-29	-0.255583	0.317	0.553	2.79e-25									NCL
CEP350	5.96e-34	-0.255265	0.344	0.604	1.4e-29									SOX6
AC010642.1	5.55e-76	-0.255067	0	0.468	1.3e-71									ZMAT4
USP7	1.38e-32	-0.25464	0.403	0.642	3.23e-28									CTNNB1
KHDRBS3	1.26e-38	-0.254452	0.217	0.518	2.96e-34									DEFB1
GARS	2.28e-33	-0.254434	0.775	0.864	5.34e-29									RP11-359M6.1
GOLGA4	1.09e-28	-0.254319	0.749	0.851	2.56e-24									LYPD6B
NT5DC2	8.37e-38	-0.253726	0.704	0.83	1.96e-33									CTD-2501M5.1
RP11-304L19.5	1.28e-72	-0.253594	0	0.453	3.01e-68									SLC4A8
CTCF	3.82e-38	-0.253575	0.422	0.682	8.95e-34									NCOA4
PRRC2B	3.72e-23	-0.253557	0.459	0.647	8.71e-19									FAM89A
LRPPRC	2.67e-28	-0.253471	0.624	0.764	6.25e-24									LYPD2
CIRH1A	1.58e-72	-0.252762	0	0.453	3.7e-68									SH3BP5
RNF213	2.59e-38	-0.252621	0.278	0.568	6.07e-34									RABGAP1L
NAP1L1	2.21e-71	-0.252528	1	1	5.17e-67									SLC39A2
PNP	9e-28	-0.25229	0.457	0.663	2.11e-23									CKS2
PPP1R12A	1.36e-36	-0.251691	0.843	0.913	3.19e-32									IGF2
STT3B	7e-18	-0.251353	0.63	0.736	1.64e-13									COL5A2
STOM	2.04e-10	-0.250789	0.38	0.503	4.77e-06									FGF10
B3GNT2	2.29e-37	-0.250721	0.23	0.541	5.37e-33									DCLK1
TFAM	6.51e-32	-0.250621	0.843	0.911	1.53e-27									WNT5B
ISL1	0.249623	-0.250614	0.411	0.342	1									WNT6
REST	1.12e-32	-0.250601	0.752	0.857	2.63e-28									ZFHX4
TUG1	4.21e-34	-0.250429	0.253	0.54	9.86e-30									SH2D4A
RAB15	2.42e-28	-0.25023	0.119	0.386	5.66e-24									DEPTOR
														SEMA6A
														GSTM3
														HSPB1
														LRRC38
														BST2
														FFAR4
														GUCY1A3
														PAMR1
														TNFSF8
														NKD1
														EMP3
														GREB1L
														ACADL
														GFRA1
														CLDN4
														MXRA8
														SLC1A3
														ANGPTL4
														TFAP2B
														DGCR6
														PCDH7
														ALDH3A2
														IFI6
														OTOR
														BICD1
														RASGRP1
														SNAI1
														ACKR3
														CDH2
														SOX4
														PKDCC
														GOLIM4
														GNAL
														RBP1
														ARL6IP1
														IDO1
														NNAT
														FGF4
														SDC2
														FERMT2
														FZD7
														DNAJC15
														GRHL1
														ALCAM
														MMP2
														HIST1H1B
														NOG
														MARK1
														PRPH
														DLX2
														LHX2
														SLC2A1
														BOC
														RPS27L
														BEX5
														MKRN1
														H1F0
														GTSE1
														HMOX1
														UBASH3B
														GADD45B
														CKAP2
														ENG
														NAP1L3
														CDC20
														ZNF503
														HEBP2
														LOX
														KCNQ1OT1
														B3GNT2
														C16orf87
														CDX1
														KIAA1462
														HEBP1
														CDH7
														PAPPA2
														LECT1
														CDCA8
														WASL
														SOCS4
														TMEM64
														PCP4L1
														GYPC
														HMGB2
														DLC1
														HOXB2
														SEMA3D
														TNC
														GYPB
														PNP
														VAT1L
														VASH2
														VGLL1
														CCND1
														GREM2
														RP11-445F12.1
														TFPI2
														FAM111B
														SLC16A10
														PHLDA2
														SHD
														B2M
														LINC00152
														HOXD9
														KIF23
														SBF2-AS1
														IL6ST
														FHOD3
														LRAT
														FAM20A
														PTTG1
														FKBP5
														TLR4
														MT-ND5
														TINAGL1
														PHLDA1
														IL17RE
														PGM5
														IQGAP2
														SOSTDC1
														KCNJ6
														SOX21
														CLIC5
														GATA6-AS1
														PAQR8
														BCAT1
														NECAB1
														CRABP1
														NPM3
														PLXNA2
														SMTNL2
														MAF
														HOXC6
														MUCL1
														MYOCD
														FAM159B
														LDB2
														RP11-132A1.3
														PTAR1
														SPG20
														ADAMTS5
														NPY1R
														CEP55
														SLC7A11
														RP11-844P9.2
														GADD45A
														VSNL1
														MMP9
														G2E3
														WNT8A
														KCNK17
														CTTNBP2
														PHLDA3
														TNFSF15
														SP5
														HPSE
														ATP1B1
														MANEA
														HOXA11-AS
														VMO1
														MXI1
														CA8
														CTC-425F1.4
														HHIP
														USP18
														HSPA1A
														FOXF1
														ABHD12B
														SORBS2
														LINC00936
														AP002856.5
														PRLR
														ACO1
														PPP1R3B
														GNAI1
														NDC80
														MPZL1
														ZNF770
														PITX2
														KCTD12
														ANGPT2
														MROH8
														THY1
														KCNJ13
														KIF14
														LYPD1
														CASP3
														FAM124B
														PVRL4
														CDK6
														FGF13
														MATN3
														ANO4
														DSG3
														KCNV1
														RP11-132A1.4
														KRT80
														STK17A
														HES4
														LEF1
														RAB31
														ANXA2R
														CLVS2
														ARL4C
														KIFAP3
														SOCS3
														ASNS
														RASGRP3
														ZC3HAV1
														CD99
														ELL2
														C4orf32
														RASD1
														IFITM3
														MTRNR2L8
														LARP7
														ATP12A
														RNF43
														B3GNT7
														TGFBI
														TNFRSF12A
														TRIM2
														PLSCR1
														POU3F2
														DYNLL1
														KIAA1324
														LMO1
														THBS2
														GZMK
														AMIGO2
														MEST
														PCP4
														C3orf58
														NLGN4X
														RDX
														DMRT1
														AKAP12
														MYO10
														UNC5C
														CD55
														LINC00545
														LAMA4
														AFAP1L2
														CADM1
														LRRN3
														CACNA2D2
														DTWD2
														CD1D
														ITGB1
														MACC1
														SPSB2
														RP11-314M24.1
														SNAPC1
														ZIC5
														FAM83D
														NRCAM
														SGOL2
														TTYH1
														HJURP
														TCF4
														SEMA6D
														ZFP36L1
														LHFP
														PLD3
														CDX4
														HIST1H1A
														S100A9
														RP11-378I6.1
														GAD1
														KIAA1217
														TMEM123
														ANO3
														PCDH9
														GABRB3
														HN1
														CSRP1
														CD200
														CLIC3
														WIPF1
														TMSB15A
														ANKS1A
														FOLR1
														FXYD6
														DUT
														LINC00379
														CREG1
														FOXH1
														HSPA8
														HOXB8
														COL9A3
														CLDN6
														MBNL2
														RP11-806H10.4
														TAC3
														SALL1
														NFE2L3
														HESX1
														AMOTL2
														PRAC1
														ITM2A
														TANC2
														EPHA7
														ROBO2
														CSF2RA
														TNIK
														LINC00261
														PDLIM1
														EPB41L2
														DLGAP4
														ZEB1
														SLC7A2
														MESP2
														TMC5
														CENPA
														GCHFR
														SOCS1
														SACS
														GPR157
														SCG3
														TMSB4X
														PITX1
														LRRTM1
														BHMT
														AASS
														ARHGAP10
														SOCS2
														CYFIP2
														TRH
														PRKCDBP
														PDK1
														DKK2
														REXO2
														KCNK12
														NUF2
														JAG1
														PIEZO2
														SLC3A2
														ZFP36L2
														KIAA0040
														TRIM24
														COL5A1
														SMAD9
														FRMD6
														LMOD2
														EFEMP1
														TMEM100
														DPF3
														MBNL3
														FEZF1
														NTM
														SLC7A3
														ARID5B
														LMO4
														HSPE1
														AP1S2
														ANGPT1
														EPHB1
														PRRG4
														ARHGAP18
														FYB
														TPD52L1
														COL1A2
														CTD-2314G24.2
														NPNT
														H2AFY2
														CHST2
														SLC16A6
														ABCC9
														RP11-798K23.4
														PHACTR1
														ARL4A
														PLS3
														CCDC3
														HS3ST1
														MSMO1
														FAM122C
														SKAP2
														JUN
														LRRC4C
														SCN9A
														DDIT4L
														VAMP8
														IGDCC3
														NMRK2
														MYC
														HOXB-AS3
														ARHGAP11A
														JAKMIP1
														TNNI3
														COMT
														NES
														RERG
														TRPM7
														COL4A3BP
														SYT6
														MLLT3
														COLQ
														SIX3
														UNC5B
														PSIP1
														NRXN1
														F12
														AC140542.2
														ATF3
														ADAMTS1
														RP11-624M8.1
														ZIC3
														LNX1
														CTC-435M10.3
														DLX6
														LINC00960
														RBMS1
														CD9
														SLC7A8
														SPNS3
														MDFIC
														RP11-663N22.1
														LGR5
														HMGCS1
														TP63
														DAB2
														RP11-295G20.2
														JADE1
														BMP5
														RP11-771K4.1
														RHOU
														KANK1
														FAM110B
														FEZ2
														EIF4EBP1
														CGNL1
														CDCA3
														LRP10
														CKB
														RAB38
														SEZ6L
														RP11-247C2.2
														CTA-29F11.1
														UBE2S
														CRNDE
														RUNX1
														GRIN3A
														FUT8
														LRRTM4
														DAAM1
														KCNH5
														RP11-586D19.2
														DTX4
														SULF1
														RP11-318C24.2
														CDC42SE1
														CDKN3
														BUB3
														ELMO1
														EPHA4
														COL25A1
														CDCA2
														GSTA4
														DIAPH2
														S1PR3
														GJA1
														EFNB2
														NAV2
														MDN1
														KLKB1
														CCDC34
														ADRA2A
														RIMKLA
														SYNE2
														NUAK1
														PTPRE
														C16orf89
														NUDT11
														SLIRP
														DYNC1I1
														ECT2
														ALDH1L2
														GPM6B
														TNFRSF19
														DDX21
														CA4
														MYO1B
														NOP16
														SPDL1
														PAX2
														EPHB3
														IGFBP4
														LPAR6
														SH3KBP1
														VCAM1
														RP11-277P12.10
														KIF21A
														CMAS
														HOXB3
														ENO2
														DST
														WNT4
														ZNF649
														TRIM38
														CKS1B
														GBP4
														B3GALT5
														CDCA7L
														BUB1
														TXN
														GPRC5A
														PRICKLE2
														HELLS
														PHOX2A
														TCEAL7
														TFDP2
														HLA-DRB1
														MYLIP
														LRRC2
														CREB3L2
														SERTAD4
														DRAXIN
														HEY2
														GLB1
														CDC42EP3
														KIAA2022
														IVNS1ABP
														RP11-69I8.2
														KIAA1456
														FAM162B
														TSC22D3
														FILIP1L
														EPSTI1
														DAZL
														PPA1
														TAOK3
														PAK1IP1
														CCDC112
														NEDD9
														NCALD
														TMTC1
														MITF
														TOMM7
														PLEKHN1
														KIFC1
														GRB10
														ITGB8
														DLL1
														KIF4A
														SDC4
														RBM24
														CRYBA1
														PHLDB2
														FAM210B
														NPR3
														ATP2B4
														FBXO5
														PCSK9
														2020-09-08
														PKP2
														LRP1B
														RP11-1E4.1
														ARHGAP28
														UACA
														MTUS1
														ICK
														PDGFA
														NOX4
														DLG2
														ADAMTS17
														ZNF165
														TSPAN5
														USP28
														ARMCX3
														CHCHD10
														FTL
														MRVI1
														PPARGC1A
														AURKB
														GNL3
														CCNE2
														JUP
														UNC13C
														MPP1
														MEGF9
														DACT1
														KIAA1551
														CYB5D2
														PRR11
														LSAMP
														ISM1
														SGK2
														FAM46B
														SCN3B
														RP13-188A5.1
														FBN2
														CAMKK2
														MFAP3L
														TMEM132B
														GFPT2
														PHC1
														SLC39A8
														BCL2L11
														EVX1-AS
														RP11-340E6.1
														ZNF703
														FGD4
														PTCHD1
														CGN
														KIF1A
														MYSM1
														RPS6KA5
														KIF26B
														RP11-20D14.6
														AMOTL1
														SET
														OSBPL9
														ZNF804A
														SEMA3E
														ARHGAP11B
														UPP1
														TPST2
														PIK3R1
														ETS2
														TCEAL2
														EPB41L4A
														VRTN
														VIPR2
														TRABD2B
														MARVELD3
														RACGAP1
														CD48
														RFPL2
														HIST1H1E
														ACTA2
														COL1A1
														ACTA1
														RP11-834C11.4
														NRG1
														MUM1L1
														RIPPLY3
														PLA2G4A
														KCNMA1
														GSTA2
														FOS
														SNCAIP
														OLFM3
														HES7
														GSC
														P2RY6
														FAM84A
														HIST1H2BK
														MT1F
														CALCRL
														ERBB4
														METTL7A
														HOXD1
														NKX1-2
														GPX2
														PLA2G4C
														ZNF385B
														ARHGAP15
														CTD-2545M3.8
														SLC17A8
														S100A8
														PENK
														AFP
														HSPB8
														FGF19
														SELE
														FRZB
														FMOD
														RP11-89N17.4
														CTD-2020K17.1
														ASCL4
														PAX8
														MT1M
														PHKG1
														BEND4
														PMEL
														CCKBR
														ERP27
														CNR1
														UBE2J1
														RP11-451G4.2
														NDST3
														TPBG
														DCN
														ARHGAP27
														BACH2
														NTF3
														TM7SF2
														KCNJ12
														HHIPL2
														CLDN11
														NREP
														RP11-128A17.1
														FAM13A
														NPFF
														ACTG2
														SPHK1
														HBG2
														HLA-DRA
														C9orf3
														SP6
														PCDH8
														RGS2
														PRODH
														LMNA
														TBX2
														RP11-379K17.12
														RP11-473M20.16
														BAALC
														KCNMB1
														MKX
														COL11A2
														SEPP1
														CDKN1A
														ALX1
														GJD2
														ABCC12
														GAPT
														CDH10
														TNNT2
														RAB17
														SEMA3C
														CYSLTR2
														FSHR
														GNLY
														IRX6
														TGM2
														FBXO32
														KRT20
														HGF
														FAM162A
														GPNMB
														LINC00648
														CDON
														LITAF
														RP11-429A20.4
														SMAGP
														FILIP1
														RFX4
														TNFRSF11B
														PTPRS
														SBSPON
														HIST1H2AC
														RP11-115D19.1
														RP11-455F5.3
														TANC1
														CRYGN
														KCNN3
														ECM1
														NXPH2
														RP11-85O21.2
														CCR1
														RP11-521B24.3
														SERPINF1
														NRP1
														ODAM
														TBC1D9
														EIF5A
														LTB
														RASGEF1B
														AMBN
														SERINC5
														EXPH5
														RAB30
														SELL
														MFSD4
														IL10
														RP11-561I11.3
														RP11-559M23.1
														SLC5A7
														PTPRN
														FRG2C
														GRAMD1C
														HCLS1
														RP11-442N1.1
														RP11-506H20.1
														NR0B1
														SLC36A2
														SCML4
														RP3-406A7.7
														SNTG1
														CAPN2
														RP11-445L6.3
														CHRDL2
														LHX9
														VAX1
														BHLHE41
														PLCL1
														ASCL1
														CTD-2035E11.3
														CASC18
														LRRN4
														RDH12
														YPEL5
														IRX2
														SPATA41
														RP11-524F11.2
														TIAF1
														CYP1B1-AS1
														KLK13
														BSN-AS2
														FOXB1
														RP11-710C12.1
														RP11-114G22.1
														SLC12A2
														SLC20A2
														TMPRSS15
														MCHR1
														PRDX4
														C2orf80
														FEZF1-AS1
														TMEM52B
														FGF9
														RP11-615I2.2
														C5orf38
														RP4-616B8.4
														GPRIN3
														RNF152
														ATP8A1
														IFITM1
														MYH15
														ZNF556
														SLC1A2
														PLAC9
														EFNA5
														TTN
														DCDC2
														CCDC160
														AC104667.3
														RXRG
														ALDH1L1
														SAMD11
														DOCK2
														RP11-120I21.2
														SLC16A3
														JADE3
														GGH
														NETO2
														EN1
														MUC15
														CTD-2316B1.2
														AKR1D1
														EMC10
														MME
														CAPN6
														PRSS35
														GRAP2
														RIPPLY2
														C6orf141
														CTNNA3
														GSTA3
														CKAP2L
														MIAT
														ARSE
														LMO2
														RASSF9
														PTGER3
														CYP26C1
														MT-CO1
														CACHD1
														GABRQ
														CDKN2C
														NRG2
														WFDC1
														UPK2
														C1orf115
														ALPK2
														COL4A1
														PRAC2
														ENTPD4
														GRIK2
														DOC2B
														RP11-679C8.2
														ELK3
														GS1-393G12.14
														GPR158
														TYROBP
														RP11-298D21.1
														RP11-420L9.5
														LINC00957
														CHN1
														HOXC13-AS
														EGR1
														ABCA4
														HLA-G
														SPTSSB
														CTC-286N12.1
														TMEM255A
														HES2
														EGFLAM-AS4
														MCOLN2
														AC098617.1
														GABRA1
														RP11-250B2.5
														RP3-470B24.5
														PPIC
														NTNG2
														CLEC4D
														ACVRL1
														SMOC1
														FGFBP1
														SCN4A
														NFKBIA
														SOX18
														CRX
														NOV
														TBR1
														RP4-555D20.4
														LINC00886
														EREG
														RP11-367N14.2
														C1QTNF3
														AC005618.6
														HLA-DMB
														FGFR1
														TRPV6
														CNTN5
														PSD
														SUSD3
														JSRP1
														SERHL2
														AC068499.10
														CATSPERG
														RP11-218I7.2
														GABRA3
														MT-ND4
														MYLK3
														PTCH1
														USP9X
														LPIN1
														LRRC37B
														CTSK
														BHLHE22
														RORB
														GCNT1
														MGAT4C
														DENND2C
														GRHL2
														UTS2
														MB21D1
														RP11-281A20.1
														AZGP1
														AC092301.3
														EMB
														PKM
														HDAC9
														PERP
														KIT
														FHL1
														TACC1
														LURAP1L
														TDO2
														GNG11
														TUBA4A
														MTA2
														HCRT
														MIR7-3HG
														LGI2
														PAG1
														ARRDC2
														MOK
														S100A13
														SPINT2
														AIM1
														ATP6V0D2
														TMSB10
														P2RY1
														FAM102B
														RDH10
														KHDRBS3
														MT-ATP6
														DNAH6
														FAM196B
														PDHB
														HOXB4
														LINC00479
														MEPE
														NRIP1
														GAS2L3
														DYNLT3
														LRP2
														AK1
														RASL11B
														ODC1
														CAV1
														TSHZ3
														MT-ND6
														NEBL
														TUBB6
														ELF3
														GLI3
														B4GALT6
														CTD-2306M5.1
														ACAT2
														ANG
														SYT7
														ACADSB
														PSORS1C2
														SLC28A3
														EGR2
														RP11-867G2.6
														AC002454.1
														SCT
														GRID2
														WDHD1
														DSCR8
														TNFRSF11A
														PLOD1
														ASPHD2
														TMEM150C
														NKAIN4
														TTC39B
														SEMA3A
														IQUB
														HAND2-AS1
														SC5D
														GDF6
														TENM4
														LINC00992
														MYOF
														SLITRK4
														SORCS1
														EPS8L2
														SRGAP3
														ARL15
														NKX2-3
														F3
														HOXB9
														AC069277.2
														CARD6
														FAM71F1
														XK
														GPRC5C
														LY6H
														FAM46C
														RP11-165J3.6
														SH2D3C
														RP11-290F24.6
														RP11-727F15.9
														FGF11
														PLEK2
														KCNK10
														EPB42
														CTF1
														QPCT
														SHBG
														KCNG1
														LINC00324
														CTB-58E17.9
														ANKRD24
														RHOC
														CEBPA-AS1
														LCA5L
														TACSTD2
														MYOM2
														FAM43A
														GLRX
														SPTB
														SHC4
														DIAPH3
														ABCC4
														APOC1
														ITGA1
														TBC1D1
														HTR1E
														PRRT4
														CACNA1C
														ENTPD3
														WT1
														PCAT4
														AMER2
														GCNT4
														2020-03-01
														MOXD1
														2020-03-04
														RP11-736K20.6
														ATP2C2
														DGKG
														TNK1
														ZFY-AS1
														FLT1
														FXYD3
														TNNT1
														SCUBE3
														FBXO2
														AP1S1
														CROT
														NAV1
														DTL
														GALNT18
														FDX1
														VASH1
														HTR7
														GNPNAT1
														MYL12B
														CEP85L
														ADSS
														ABLIM1
														BTG1
														IER2
														TNMD
														RAPGEF5
														TWIST1
														PIM1
														COL23A1
														DUSP4
														ARHGAP42
														SHISA6
														ETV1
														SUN2
														CST2
														GPATCH11
														FRY
														DPYSL5
														MYRFL
														PRSS22
														TNFRSF9
														LIMCH1
														ZNF471
														PRELP
														POU3F1
														PSRC1
														FOSL2
														STARD10
														DACT3
														RP11-84C10.4
														DNAJA1
														THSD7A
														BACE2
														PPP1R2
														KIAA0226L
														LMO7
														ITGB5
														HIST1H2AH
														PBK
														TTC3
														TCERG1L
														IL1RAPL1
														KNSTRN
														GNA14
														DMRT3
														LINC00698
														SYNE3
														LRRC17
														CEACAM19
														MT-ND4L
														RP11-443B7.1
														AP3B2
														ELAVL2
														CHORDC1
														IDS
														CXorf57
														RP11-462L8.1
														LAMC2
														RP11-794G24.1
														MXRA5
														RP11-10A14.6
														KLF7
														MDFI
														HS6ST2
														CYP27A1
														TTR
														OTX1
														IDH1
														MAGI2
														BMPER
														OLFM1
														FGD6
														TGM1
														RP11-297M9.1
														SLC9A9
														DIRAS2
														TMEM30A
														VGF
														NPM1
														EIF3K
														KIF18A
														LYSMD2
														HSPD1
														INPP5D
														APBB1IP
														CCND3
														ARHGAP40
														ANP32B
														PLEKHF1
														CHST8
														PLP1
														PDE8B
														MIR181A2HG
														ELMOD1
														KRT23
														SCGB1D2
														SLC40A1
														PPFIBP1
														BNC2
														NSG1
														PRSS1
														RRM2
														TNNC2
														MECOM
														PDLIM7
														CHI3L2
														ST8SIA6-AS1
														EHBP1L1
														CAST
														DSE
														FRRS1
														PDE4D
														SULF2
														HMGN5
														AC007682.1
														KLF5
														SOX11
														WWTR1
														GPATCH4
														GUCY1A2
														NDRG2
														GUCY1B3
														BIK
														CD47
														THRB
														NUDT8
														RP11-793H13.10
														SYDE2
														CDC6
														MTSS1
														FAM49A
														RP11-562F9.2
														SCG5
														CSF3R
														RP11-504A18.1
														INSIG1
														KCND3
														AC007392.3
														MFSD7
														HNF1B
														KLB
														GLRA3
														CDH18
														MRAP2
														RP5-899B16.1
														AC003090.1
														SLC29A1
														ADAMTSL4
														RBM20
														BTG2
														RP11-89K11.1
														U91319.1
														FXYD4
														IRX5
														UMODL1
														RP11-89K21.1
														CDRT4
														RAB37
														KCNN4
														PAPPA
														SAMD13
														ANKRD45
														PREX2
														TNIP3
														CTD-2587M2.1
														ROR2
														AKR1C3
														ZNF467
														AF003625.3
														RAB25
														APOBEC3B
														FAM201A
														MRVI1-AS1
														RP11-83B20.1
														SLC25A18
														FOXA1
														FAM181B
														FBXL16
														RP5-821D11.7
														TRPV2
														LAYN
														CRYBA4
														ETS1
														JARID2
														MCC
														NUDCD1
														RP11-196E1.3
														FIGN
														RP11-286B14.1
														PRKCE
														CASP10
														CHRNA9
														KLF3
														INPP4B
														TLL1
														KIF4B
														LBR
														TCF7L2
														SHROOM3
														ISLR2
														HECW2
														CLDN3
														GTF2IRD2B
														NR2F2
														MYOZ1
														CTD-2142D14.1
														CHMP4C
														BTF3
														HHLA1
														ITGA5
														FOSL1
														PCLO
														DPP10-AS1
														RALB
														EYA2
														PHACTR2
														AC009501.4
														PRDM14
														SLC36A1
														SATB2
														ARHGAP31
														CXXC4
														RGS3
														PDCD2
														ROBO1
														LCK
														WDR76
														HLTF
														SFN
														MNS1
														SOX3
														BCHE
														CAMK2D
														COX6A2
														STK31
														TEX14
														PPID
														SLC7A14
														CTD-2006H14.2
														ENDOD1
														GABRG3
														CDIPT-AS1
														PDLIM2
														TSHZ2
														VWA5A
														B4GALT1
														KDELR3
														FAM64A
														QSER1
														IAH1
														DDIT3
														CHL1
														RPP25
														PEBP1
														MFGE8
														NASP
														PCDH18
														ABCA7
														FAM110A
														VCL
														WBP5
														NEXN
														KDM7A
														ERVH48-1
														GRIK3
														ABCA1
														RUNDC3B
														LINC00958
														CCDC6
														TXLNG
														TIMP4
														GUCY2C
														SEMA5A
														C1orf53
														TP53INP1
														CPEB4
														MMP23B
														RP3-428L16.2
														CREB5
														GRB14
														TNS4
														KANK4
														TCHP
														MAD2L2
														LINC01021
														INPP1
														ARFGEF1
														CTC1
														XXbac-BPG27H4.8
														ENPP4
														CHN2
														DCAKD
														FAM126A
														PVRL2
														NBEA
														SSBP3
														PPP1R14C
														DPP6
														RPRM
														MALT1
														ARHGAP30
														UNC50
														PRR15
														SLC5A3
														DOK6
														RPUSD3
														TBKBP1
														COLGALT2
														UBL3
														EBF2
														RNF19A
														MLPH
														EPB41L3
														SCPEP1
														DNAJC13
														CCNB2
														ONECUT1
														IFFO1
														TPD52
														BBC3
														QDPR
														SORBS1
														NUCB2
														ANKRD37
														GRPR
														GOLM1
														MVD
														FXYD1
														SLFN5
														EDA
														GLIS3
														ACY3
														KCNK1
														RGL1
														NKAIN2
														SLC2A12
														CTD-3025N20.3
														EBF3
														GLDN
														LINC-ROR
														CBLC
														CDH4
														MAPK10
														TNNI1
														ANKRD65
														SV2C
														HIST1H3E
														KB-1460A1.5
														LMOD1
														AC079922.3
														RP11-17A19.2
														SCN11A
														SYNPR
														CHRD
														CTD-2026G6.3
														TMPRSS11F
														MGLL
														RP6-24A23.6
														ESRRB
														KLHL34
														LONRF3
														ZBED5-AS1
														SLC14A2
														TRPC6
														CCDC172
[truncated: 13 more rows]
