# Supplementary figures and images for: High-resolution transcriptional and morphogenetic profiling of cells from micropatterned human ESC gastruloid cultures
Source: eLife journal article supplement (doi:10.7554/elife.59445), 2020-11-18

Figure 1—figure supplement 1

A

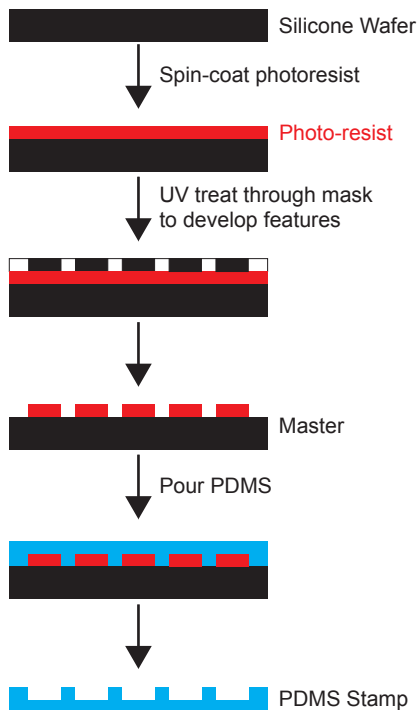

B

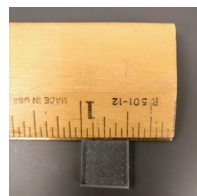

C

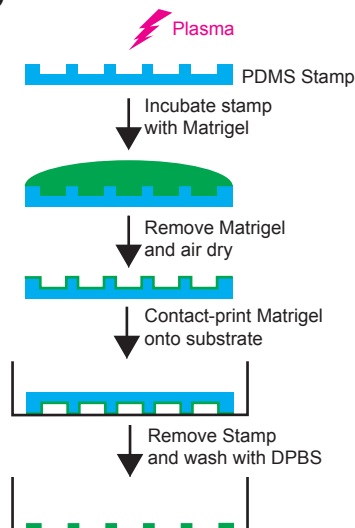

D

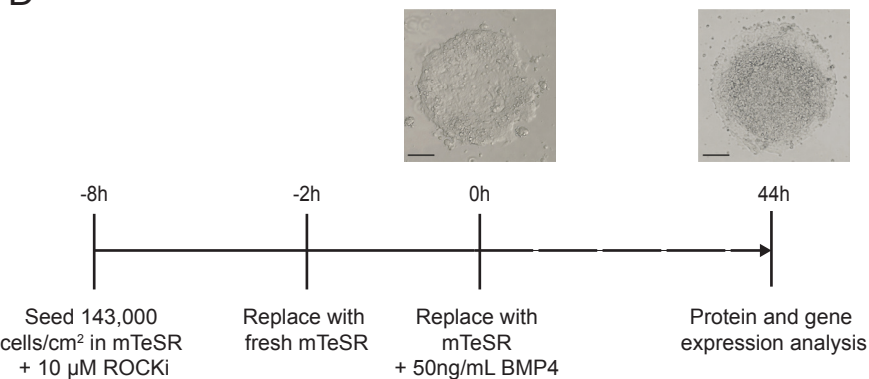

Supplement: supp [file elife-59445-supp-v1.zip › elife_poa_e59445_Figure_1_figure_supplement_1.pdf]

Figure 1—figure supplement 2

6H

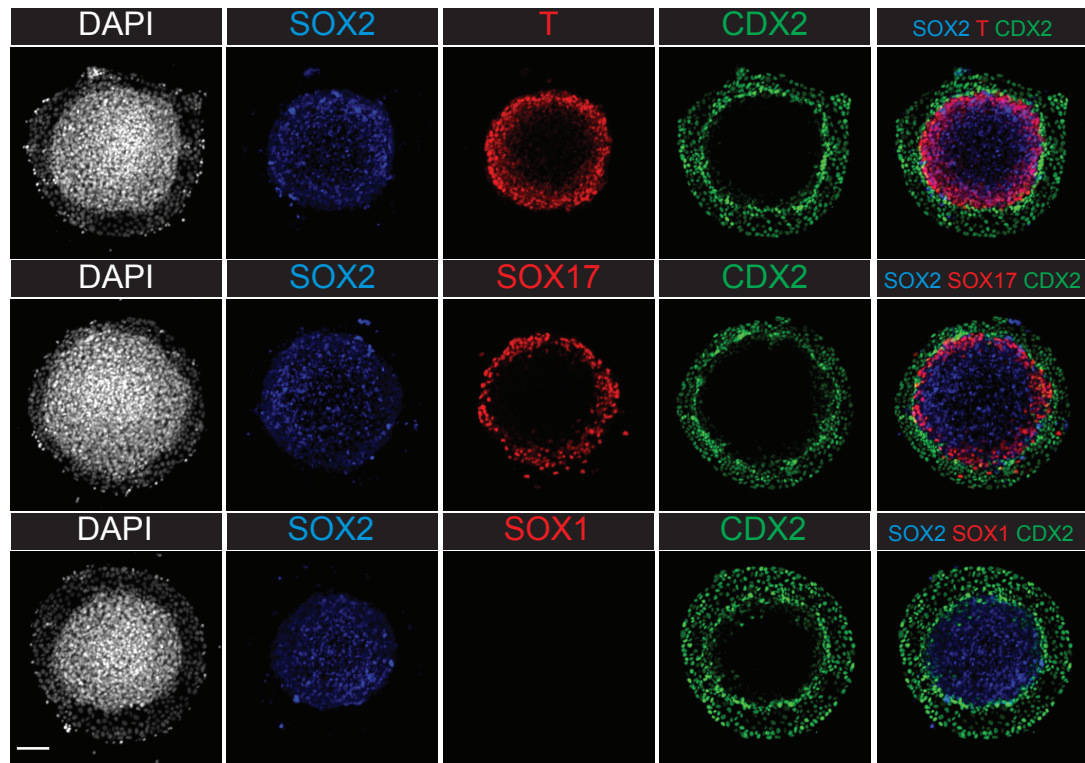

Supplement: supp [file elife-59445-supp-v1.zip › elife_poa_e59445_Figure_1_figure_supplement_2.pdf]

Figure 2—figure supplement 2

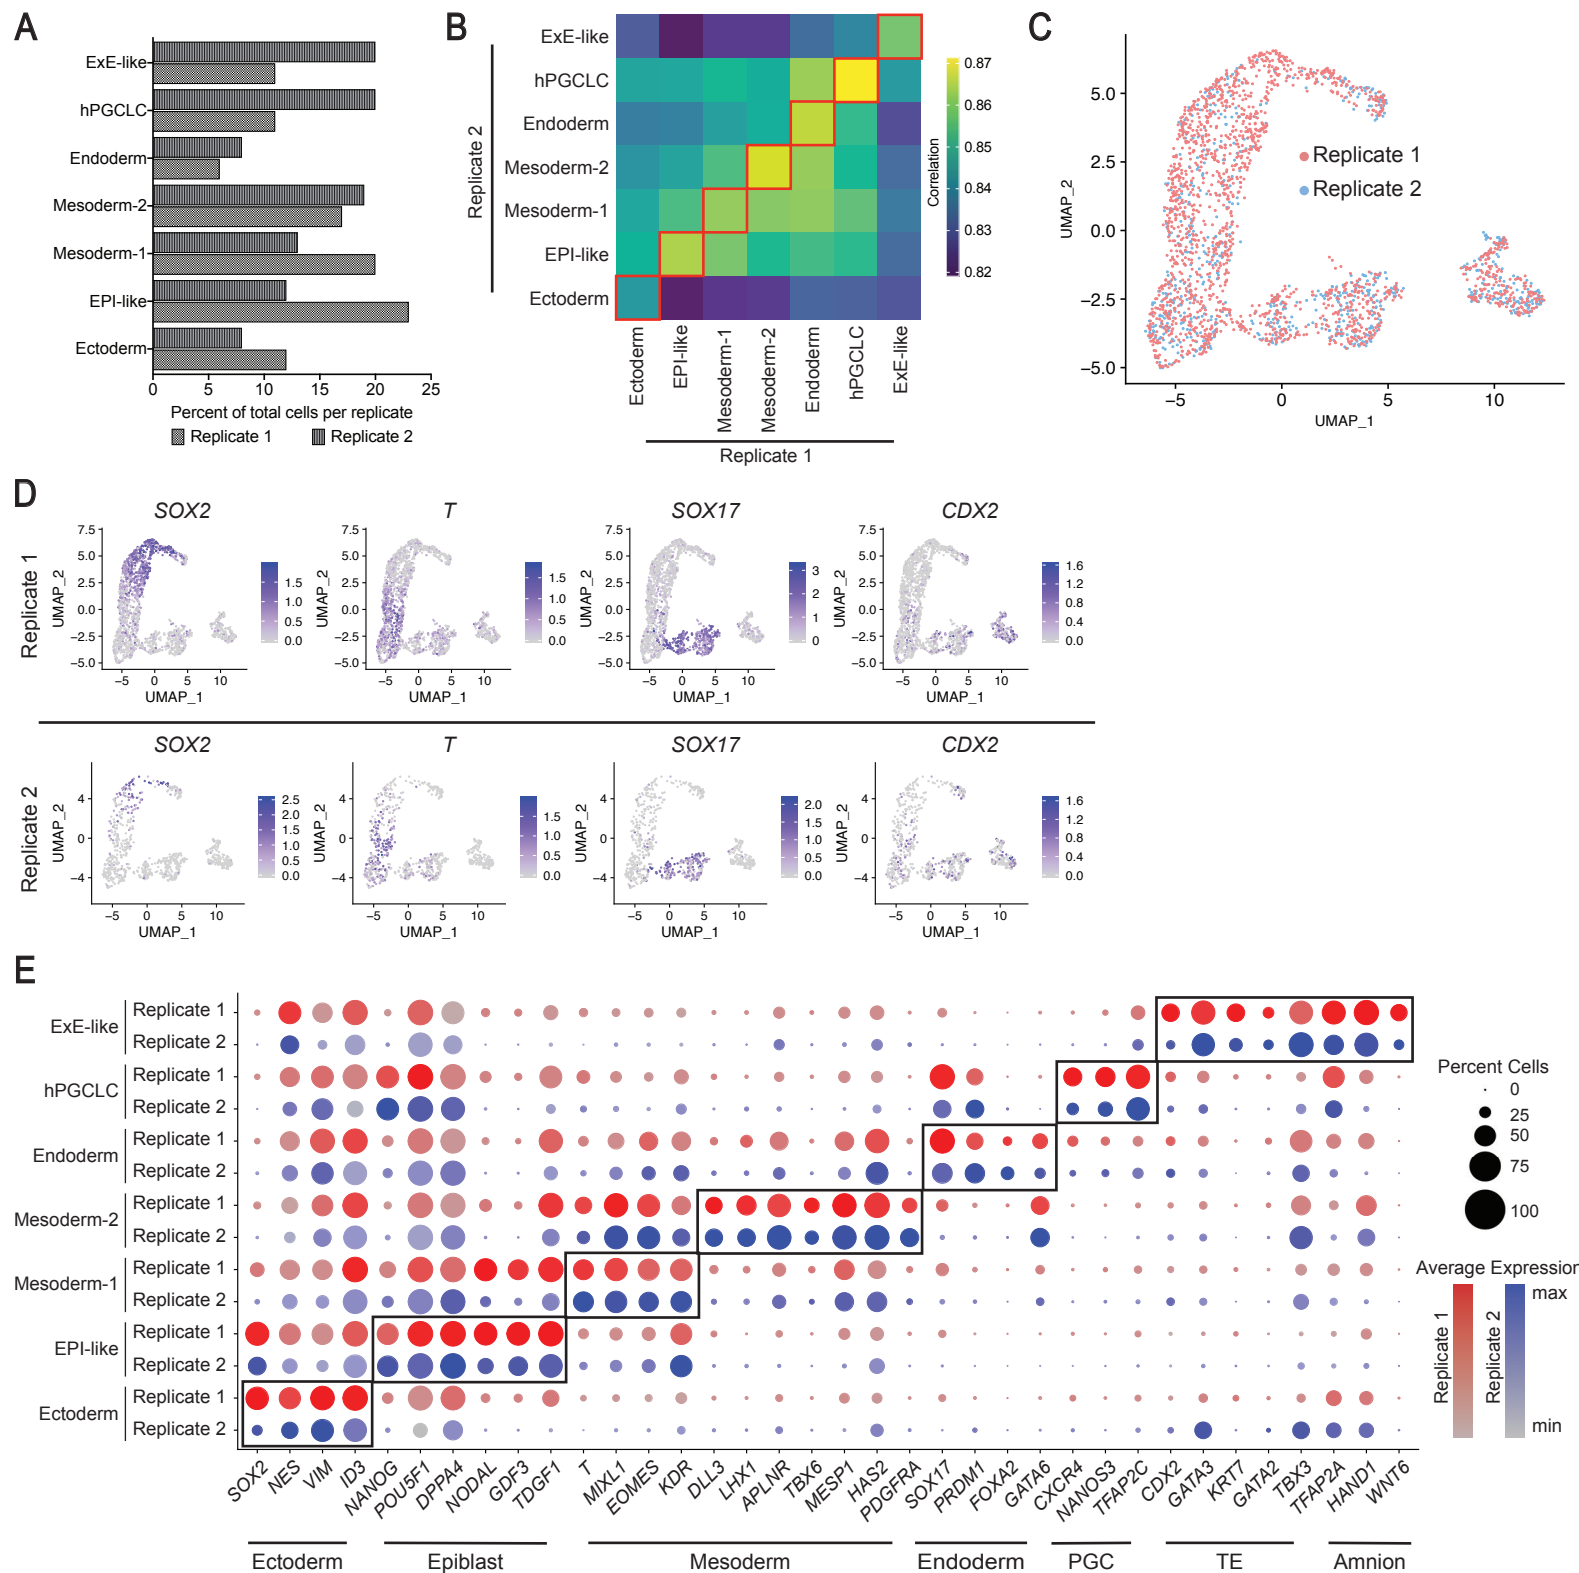

Supplement: supp [file elife-59445-supp-v1.zip › elife_poa_e59445_Figure_2_figure_supplement_2.pdf]

Figure 3—figure supplement 1

A

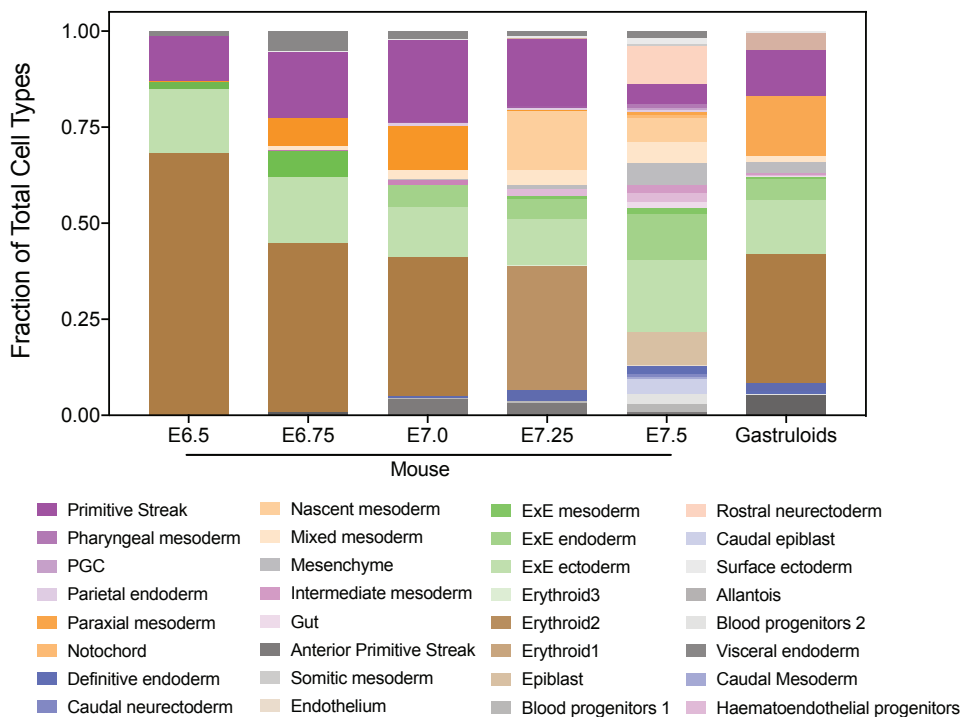

B

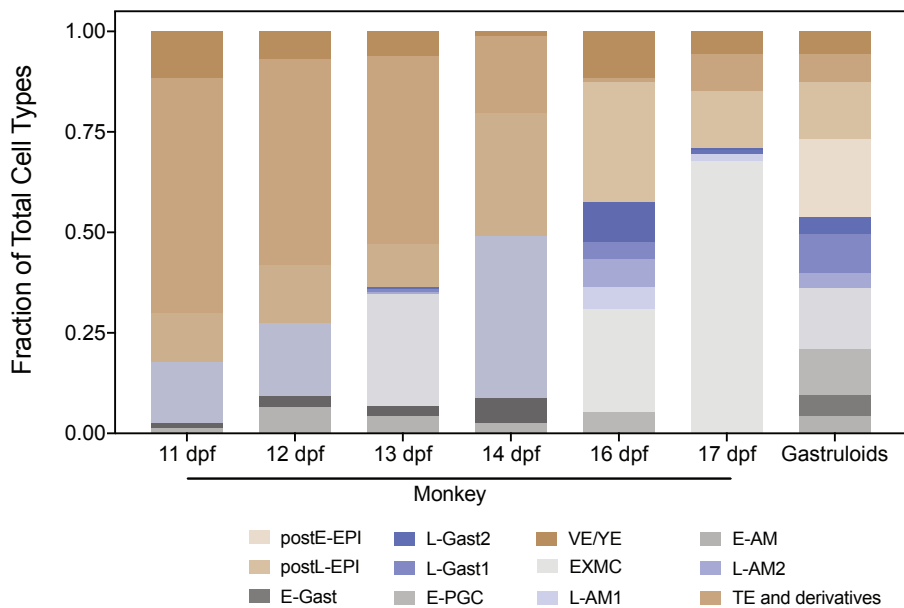

Supplement: supp [file elife-59445-supp-v1.zip › elife_poa_e59445_Figure_3_figure_supplement_1.pdf]

Figure 3—figure supplement 2

A

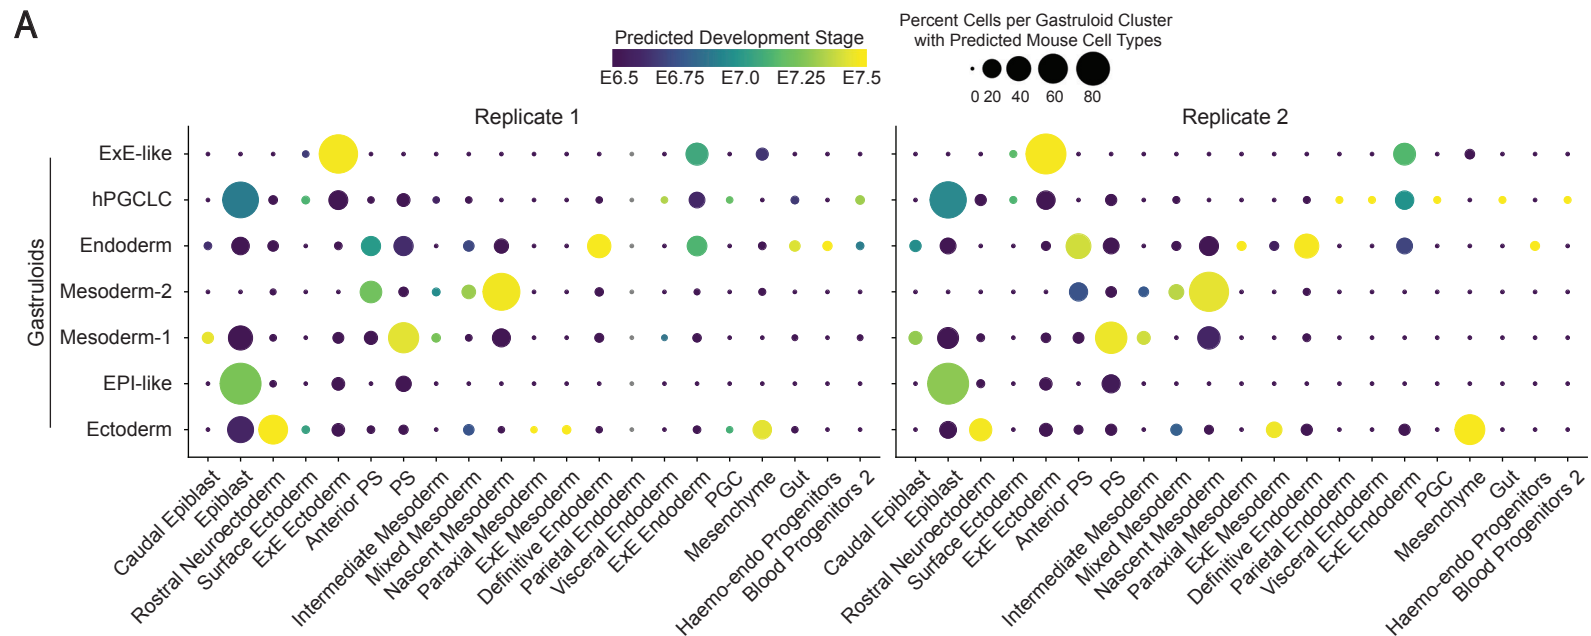

B

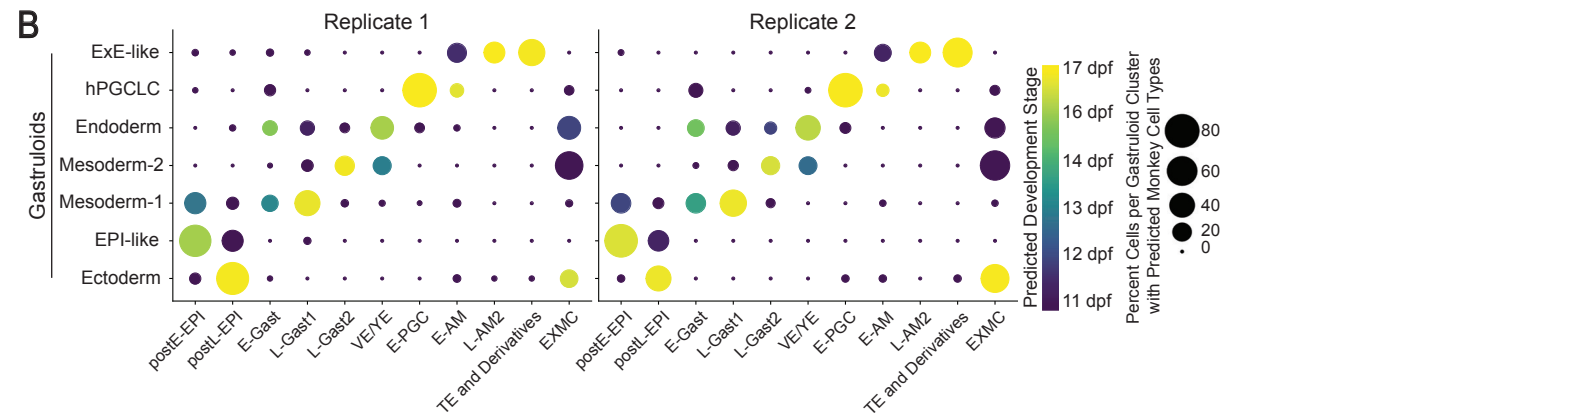

Supplement: supp [file elife-59445-supp-v1.zip › elife_poa_e59445_Figure_3_figure_supplement_2.pdf]

Figure 3—figure supplement 3

A

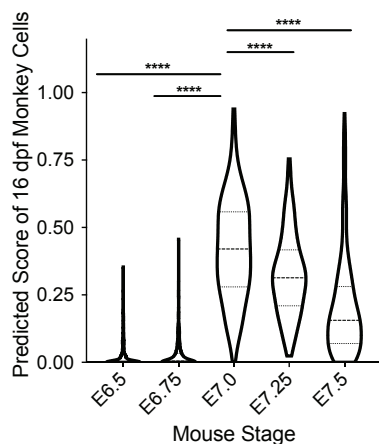

B

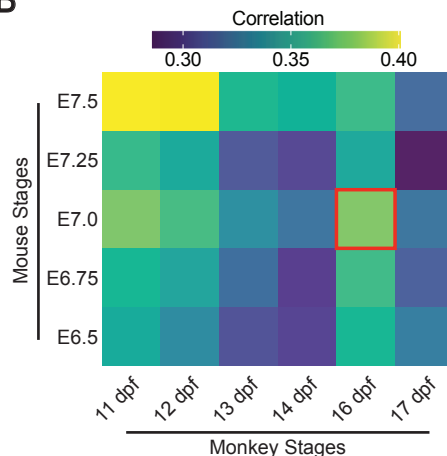

C

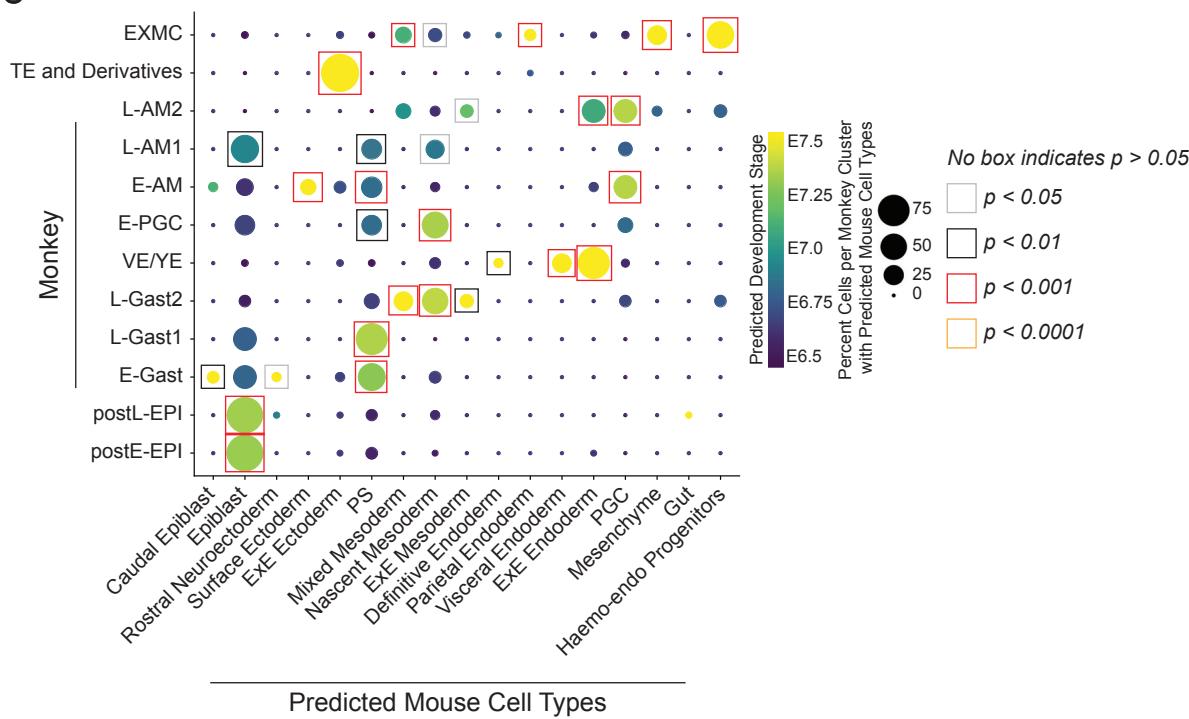

Supplement: supp [file elife-59445-supp-v1.zip › elife_poa_e59445_Figure_3_figure_supplement_3.pdf]

Figure 3—figure supplement 4

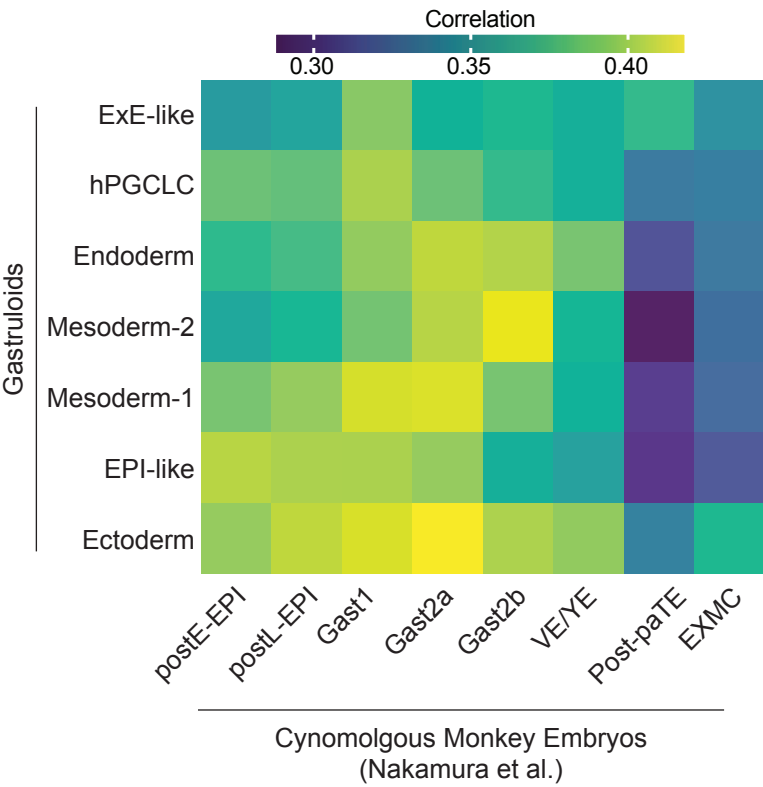

Supplement: supp [file elife-59445-supp-v1.zip › elife_poa_e59445_Figure_3_figure_supplement_4.pdf]

Figure 4–figure supplement 1

A

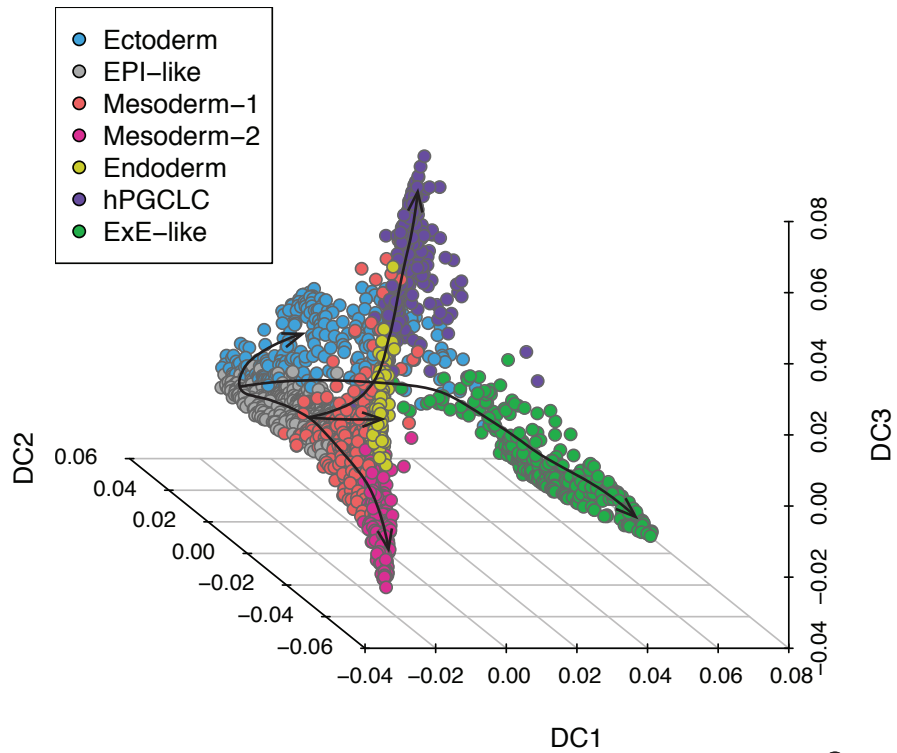

B

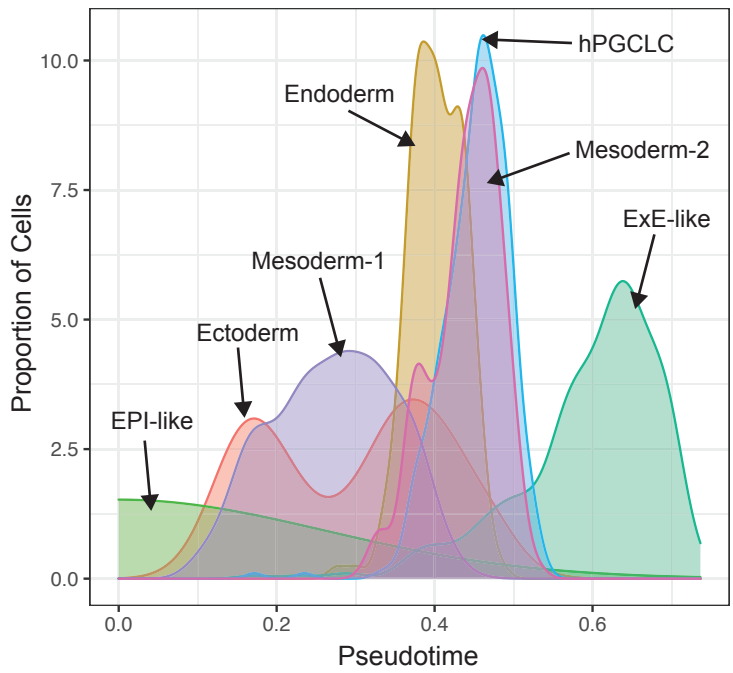

C

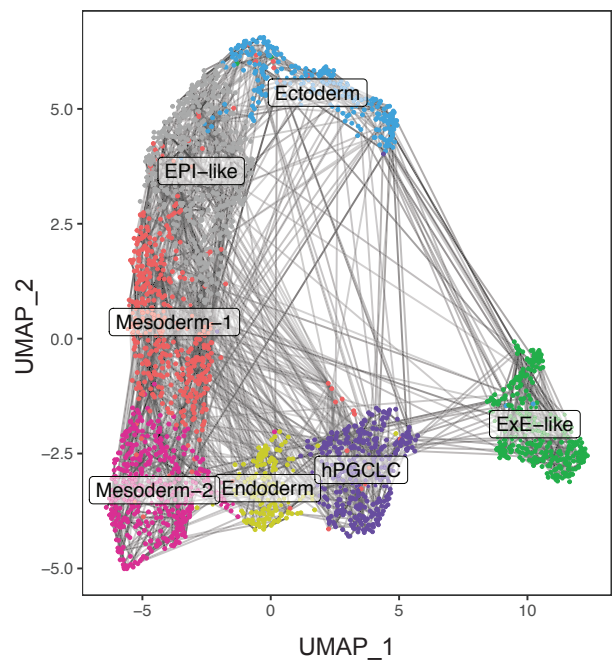

Supplement: supp [file elife-59445-supp-v1.zip › elife_poa_e59445_Figure_4_figure_supplement_1.pdf]

Figure 4—figure supplement 2

Gastruloid Ectoderm

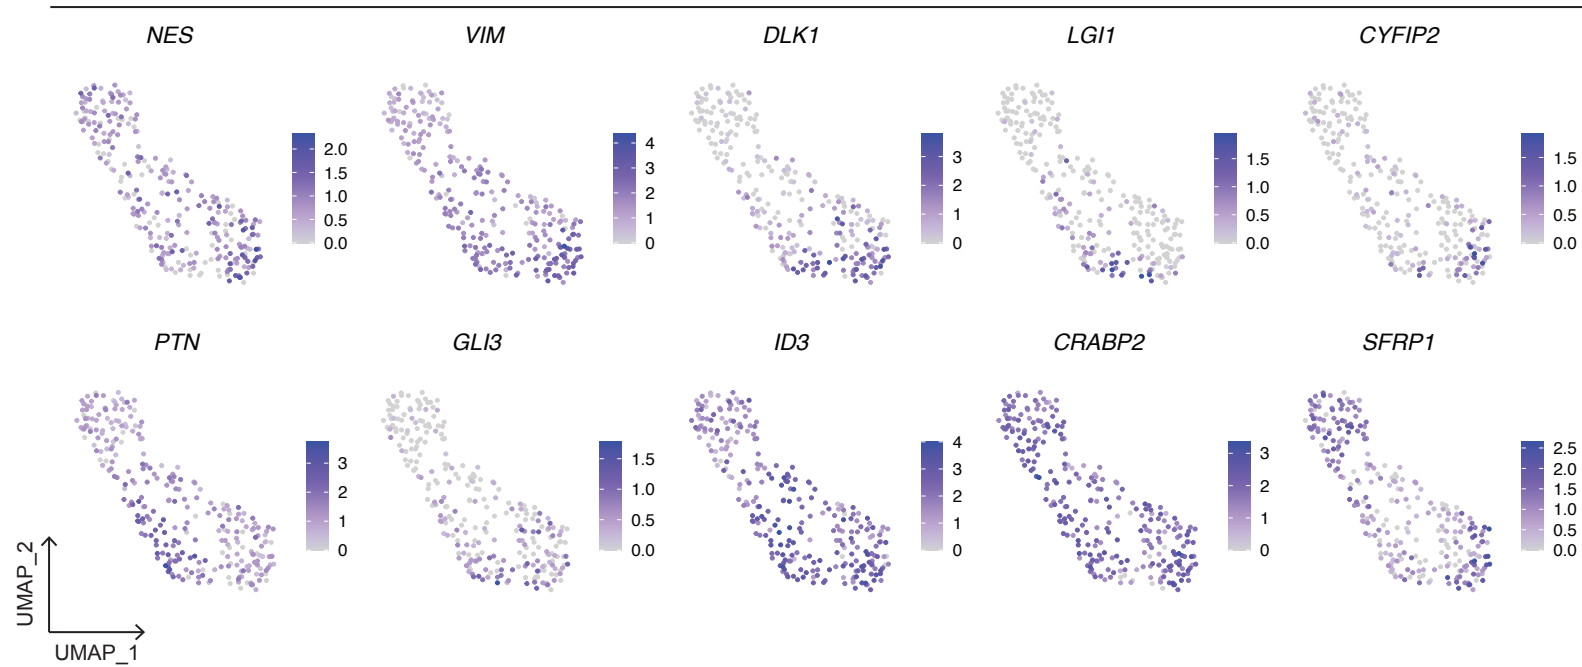

Supplement: supp [file elife-59445-supp-v1.zip › elife_poa_e59445_Figure_4_figure_supplement_2.pdf]

Figure 4—figure supplement 3

**A**

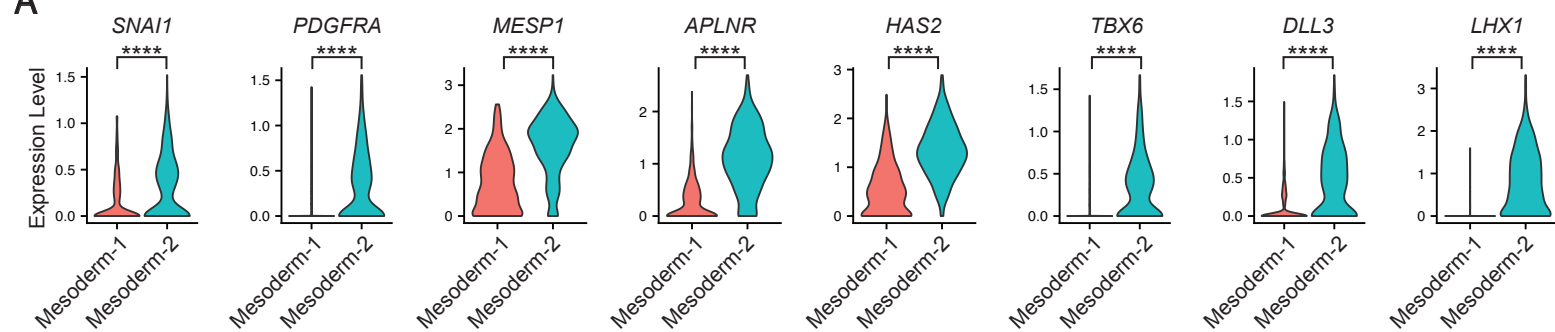

**B**

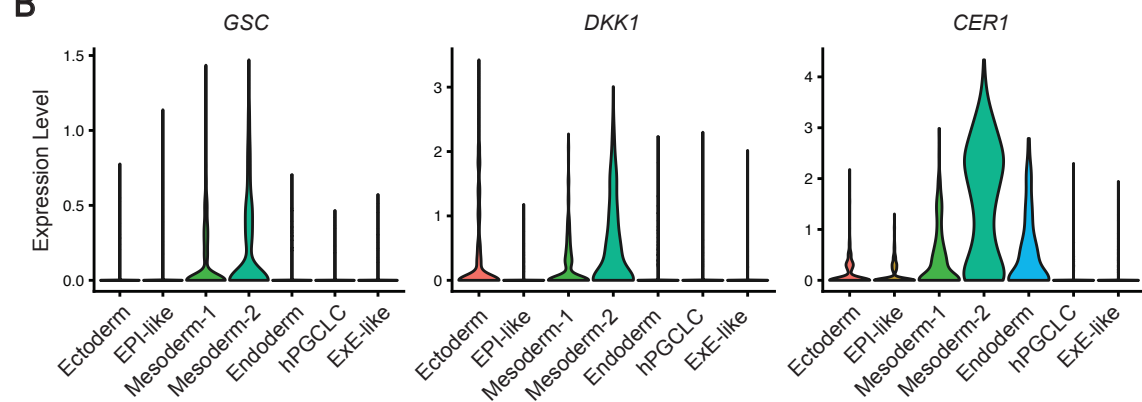

**C**

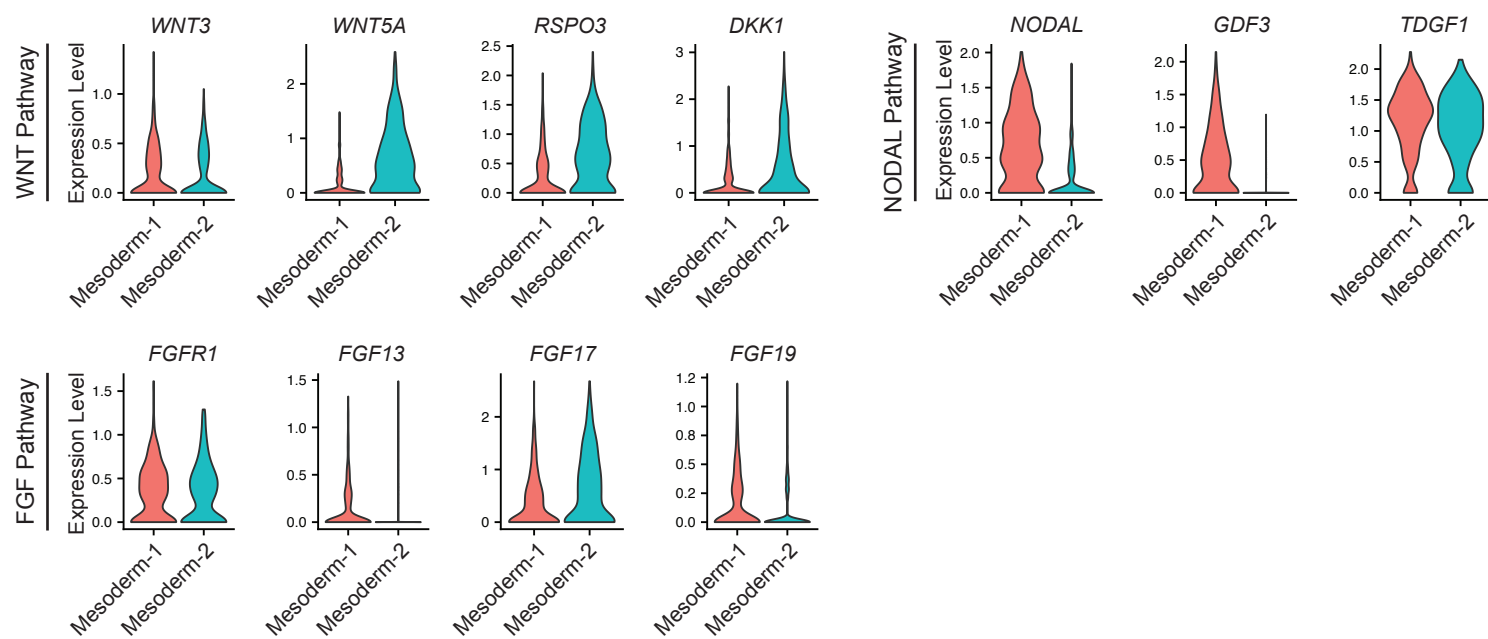

**D**

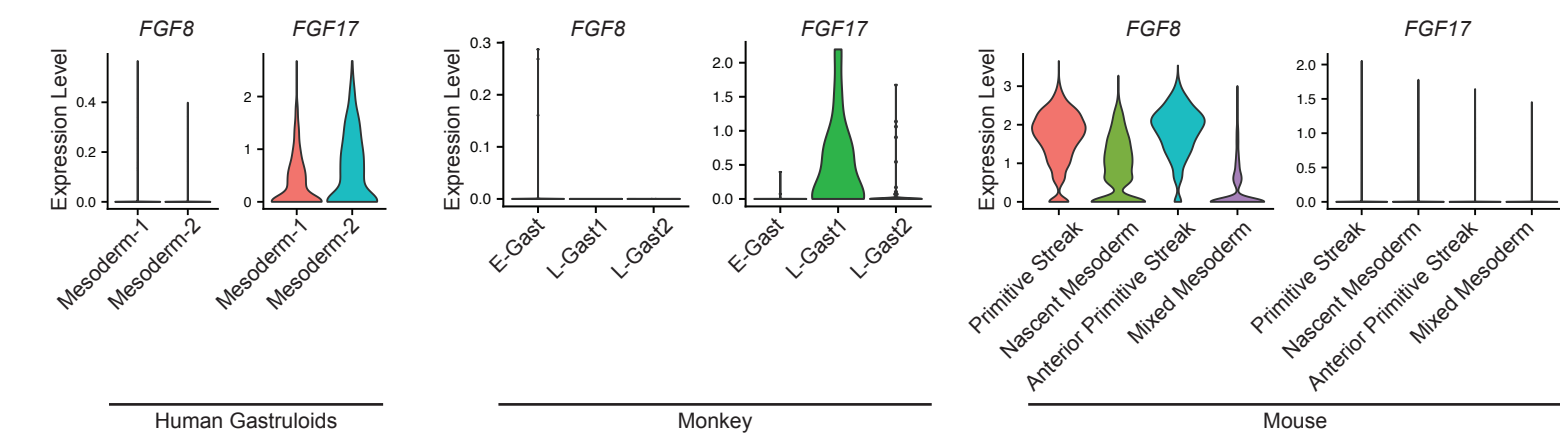

Supplement: supp [file elife-59445-supp-v1.zip › elife_poa_e59445_Figure_4_figure_supplement_3.pdf]

Figure 4—figure supplement 4

Top 50 differentially expressed mokey EXMC genes

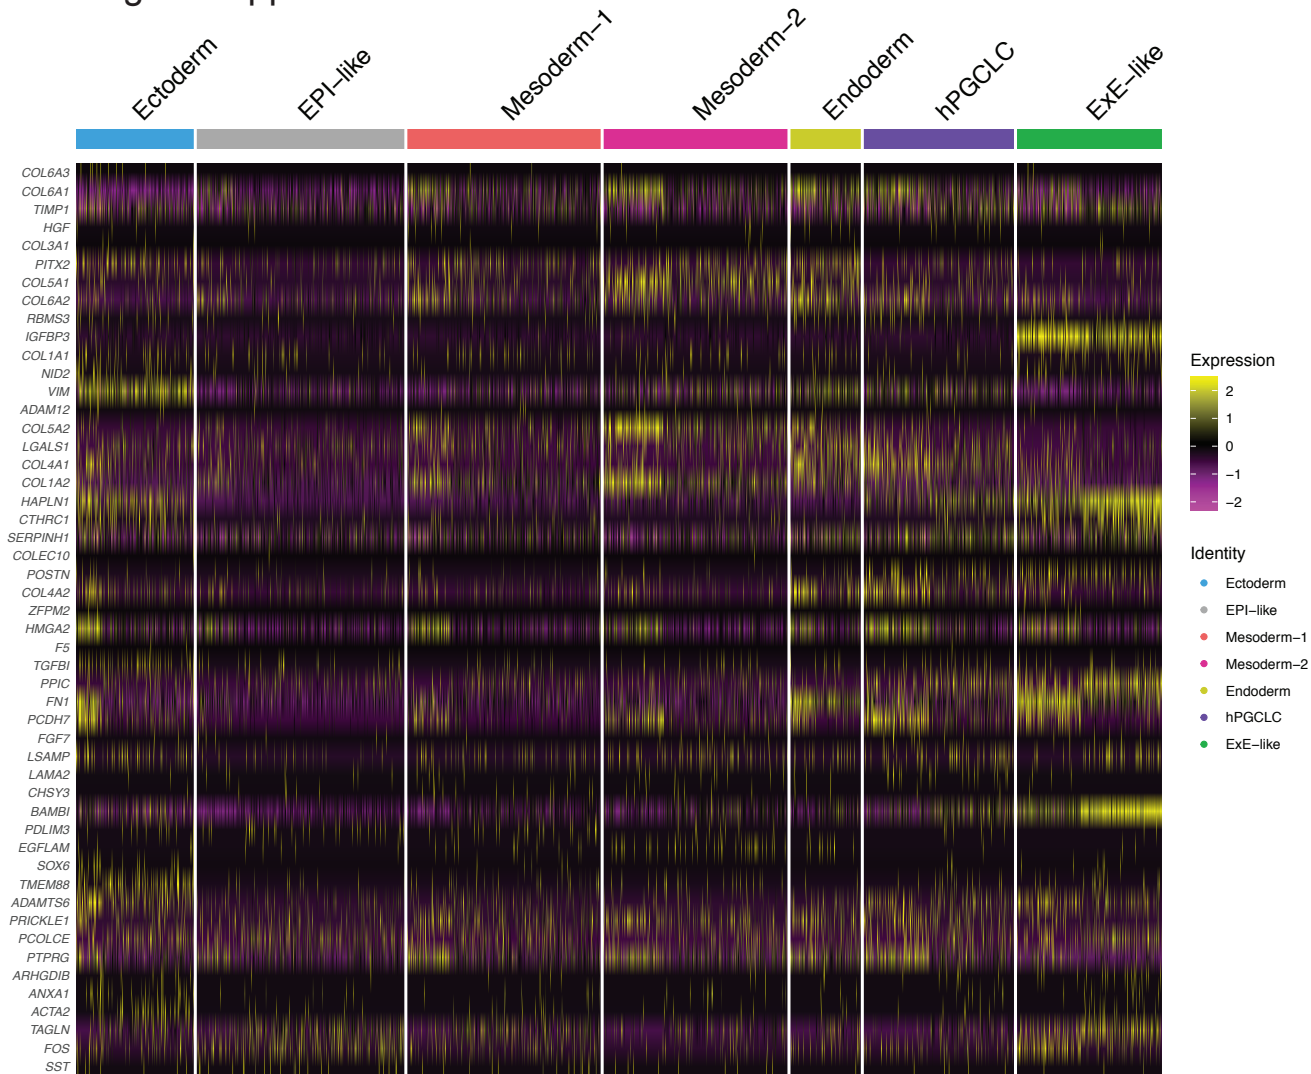

Supplement: supp [file elife-59445-supp-v1.zip › elife_poa_e59445_Figure_4_figure_supplement_4.pdf]

Figure 4—figure supplement 5

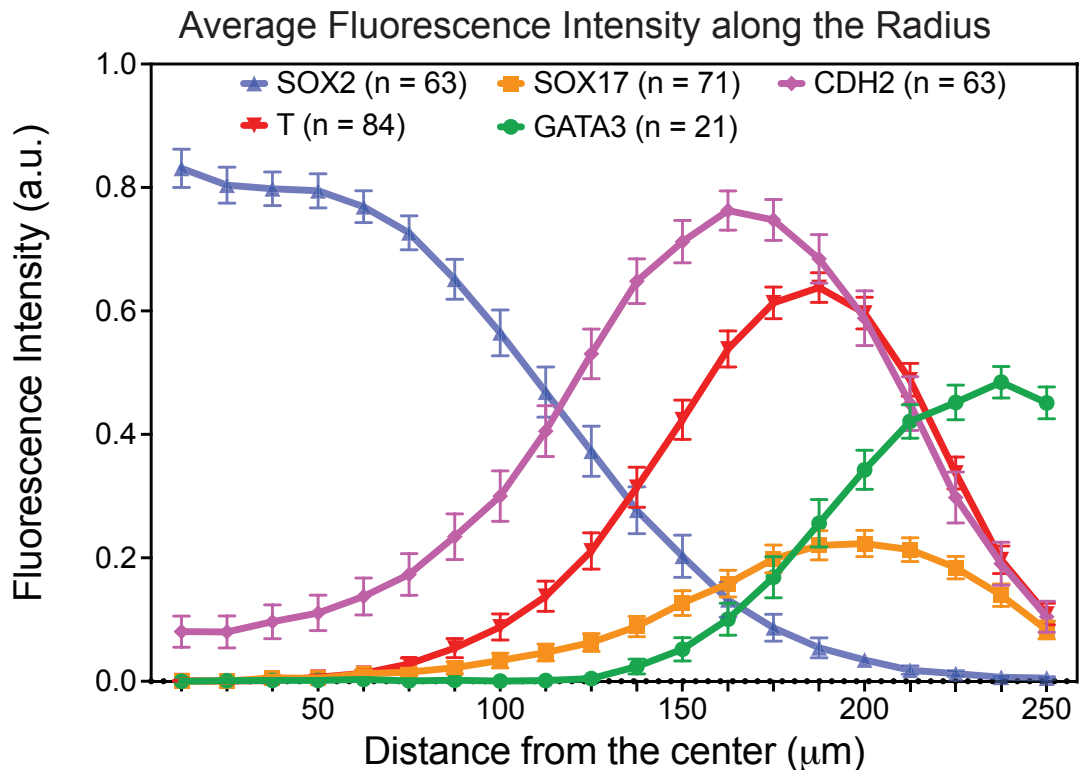

Supplement: supp [file elife-59445-supp-v1.zip › elife_poa_e59445_Figure_4_figure_supplement_5.pdf]

Figure 4—figure supplement 6

Gastruloid Endoderm

*SOX17*

*FOXA2*

*GATA6*

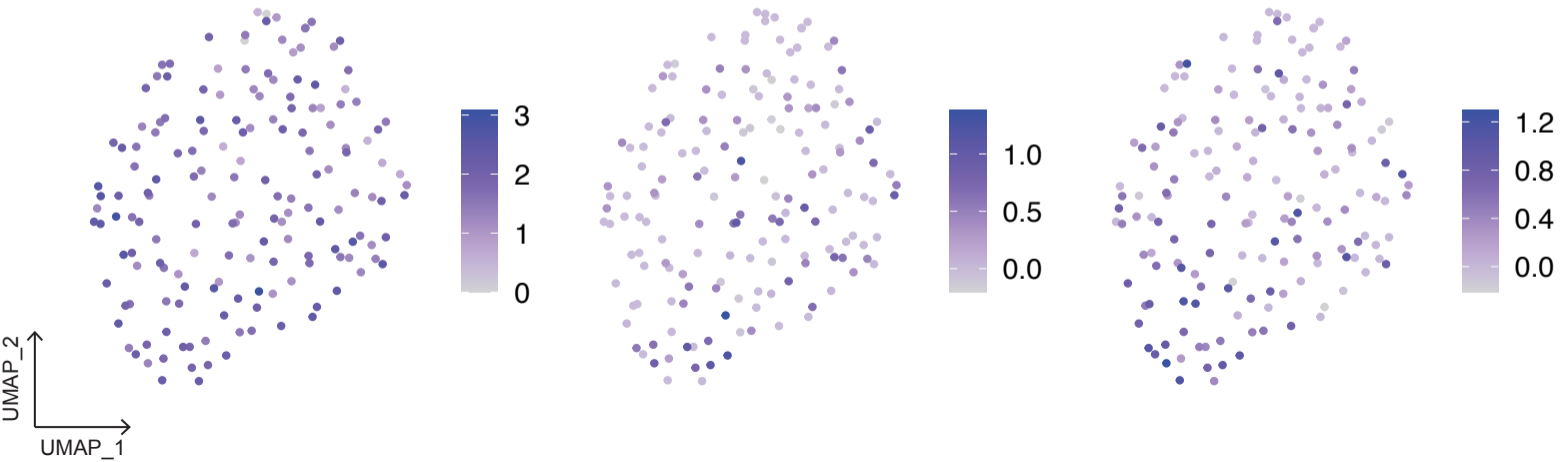

Supplement: supp [file elife-59445-supp-v1.zip › elife_poa_e59445_Figure_4_figure_supplement_6.pdf]

Figure 5—figure supplement 1

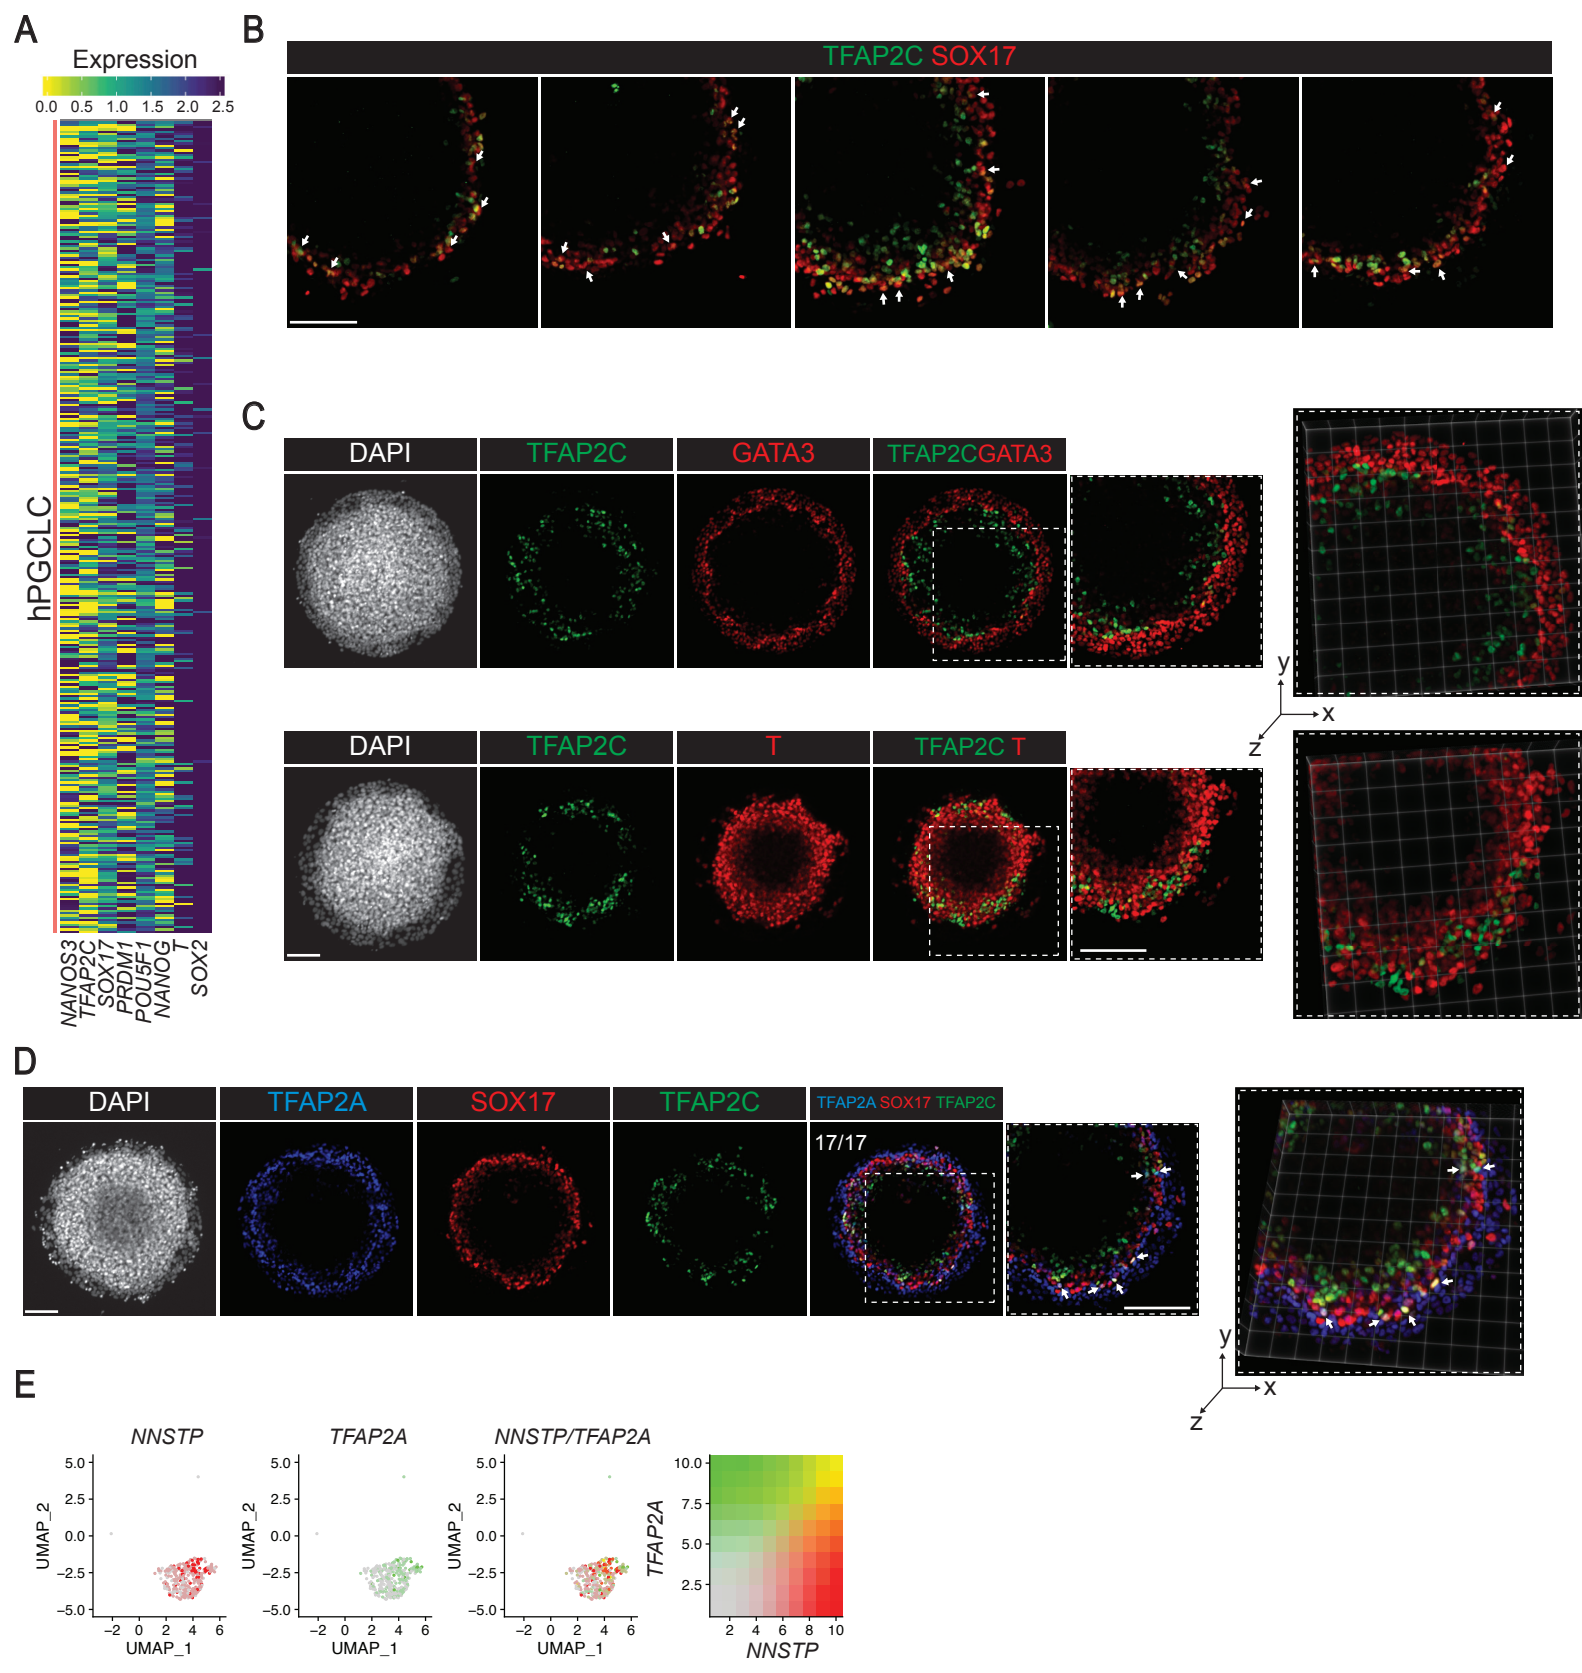

Supplement: supp [file elife-59445-supp-v1.zip › elife_poa_e59445_Figure_5_figure_supplement_1.pdf]

Figure 7—figure supplement 2

A

### 48h Reseeded Cultures vs. Gastruloids

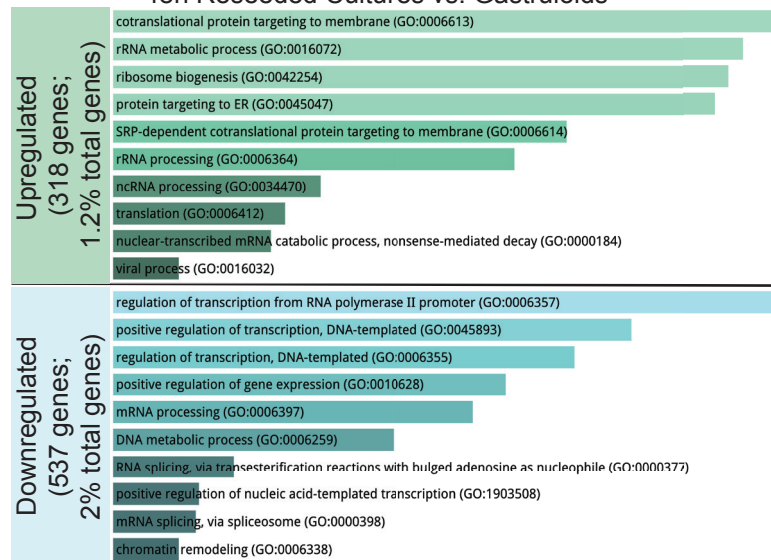

B

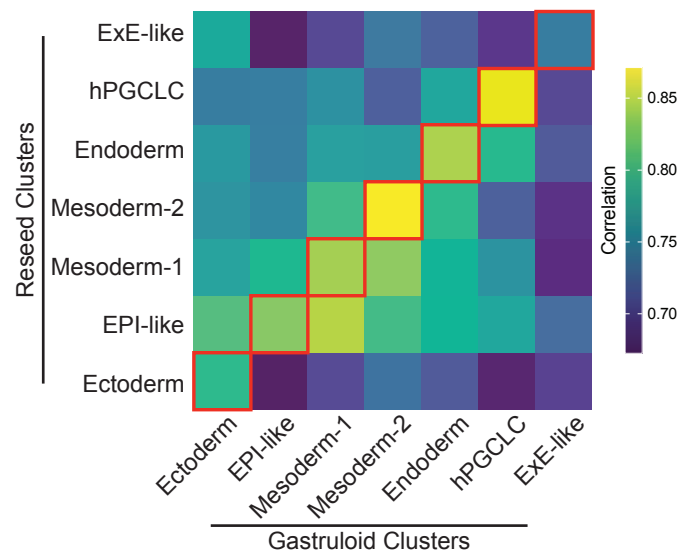

C

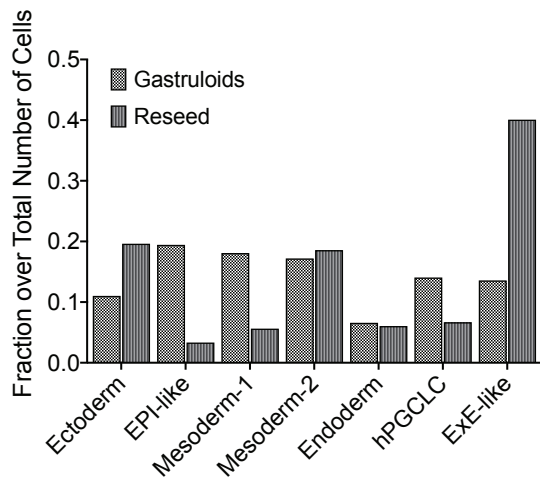

Supplement: supp [file elife-59445-supp-v1.zip › elife_poa_e59445_Figure_7_figure_supplement_2.pdf]

Figure 8—figure supplement 1

A

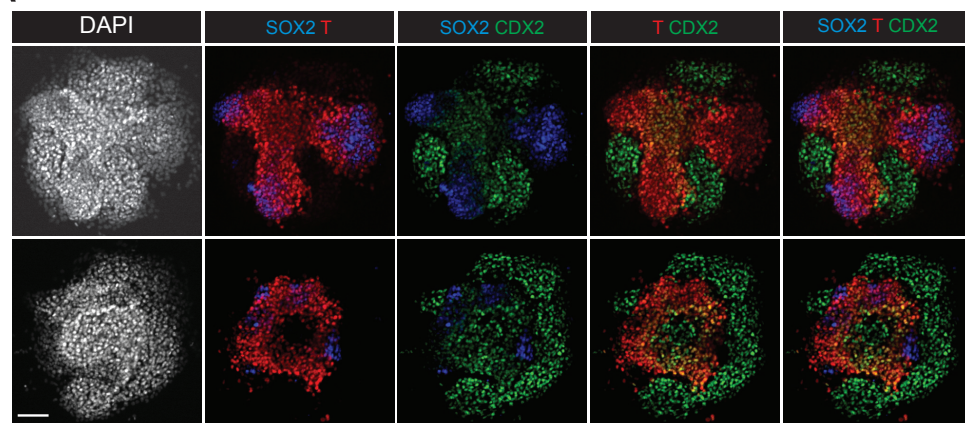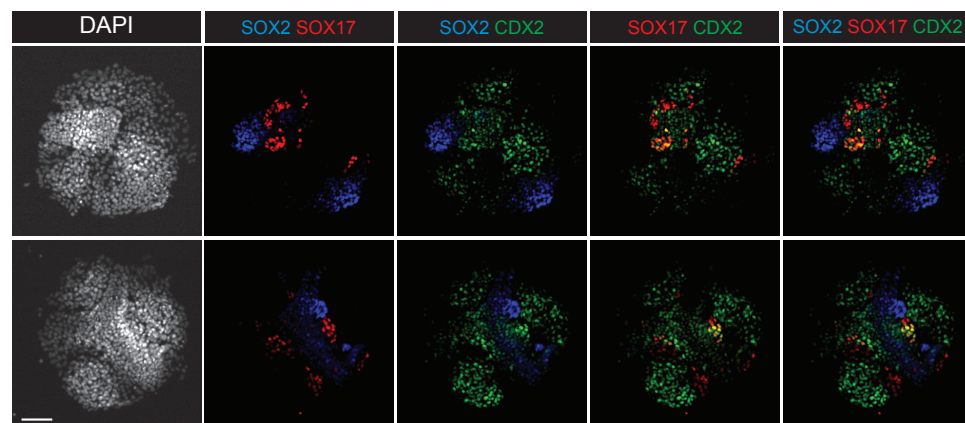

B

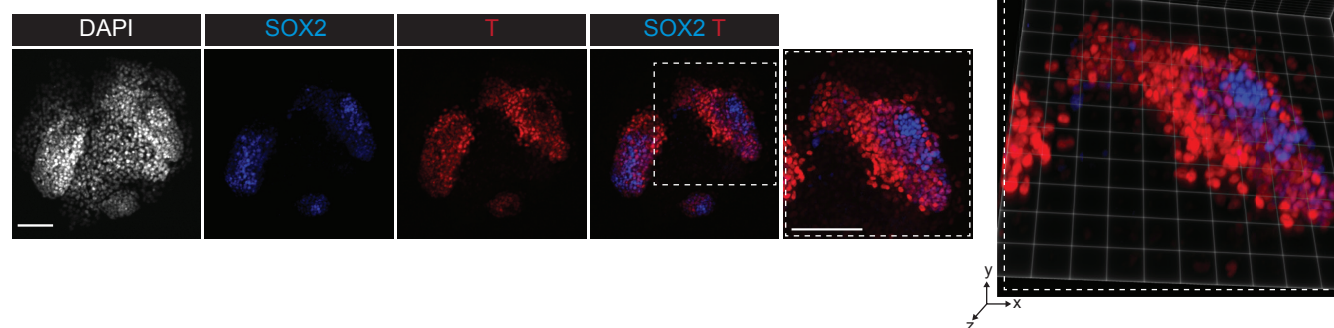

C

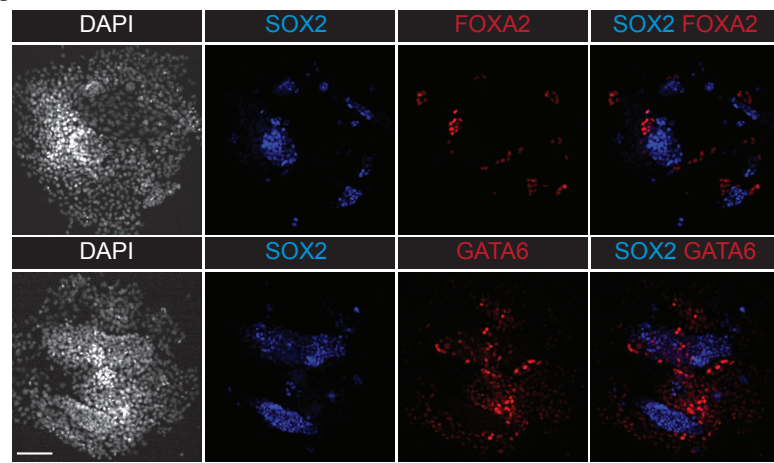

D

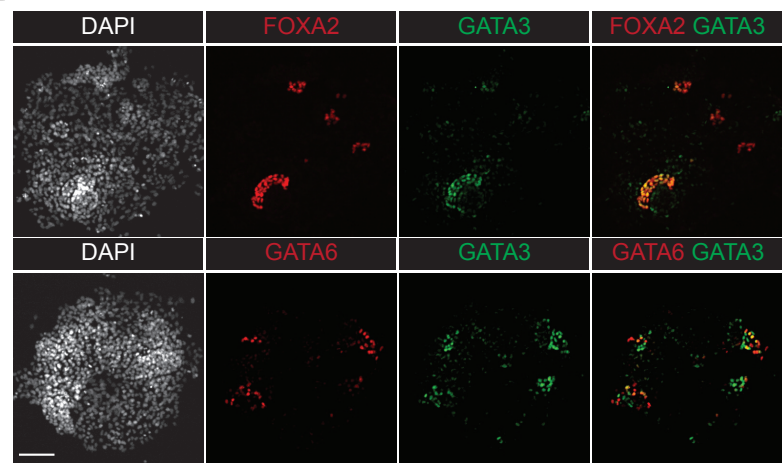

Supplement: supp [file elife-59445-supp-v1.zip › elife_poa_e59445_Figure_8_figure_supplement_1.pdf]

Figure 8—figure supplement 2

**A**

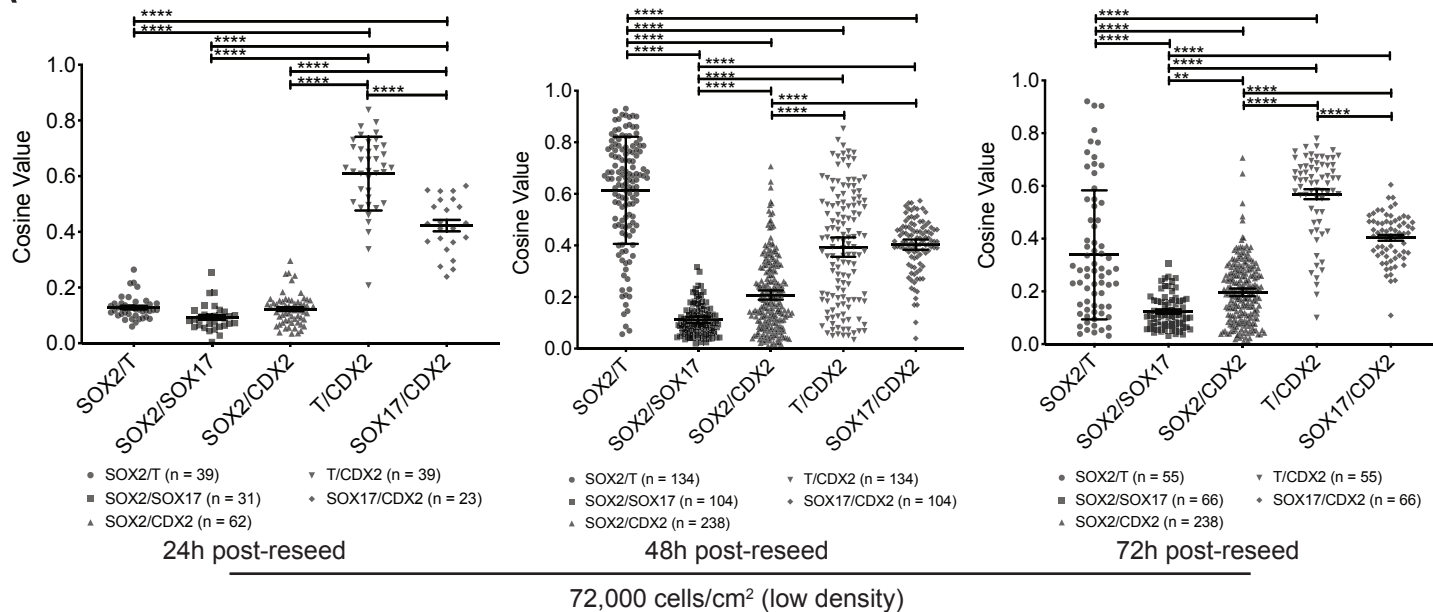

**B**

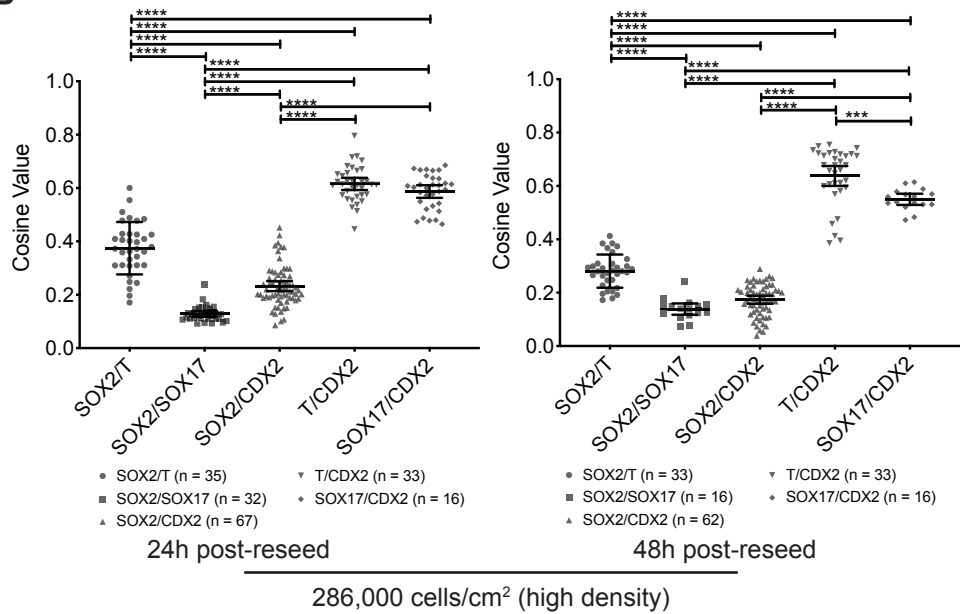

Supplement: supp [file elife-59445-supp-v1.zip › elife_poa_e59445_Figure_8_figure_supplement_2.pdf]

Figure 8—figure supplement 3

A

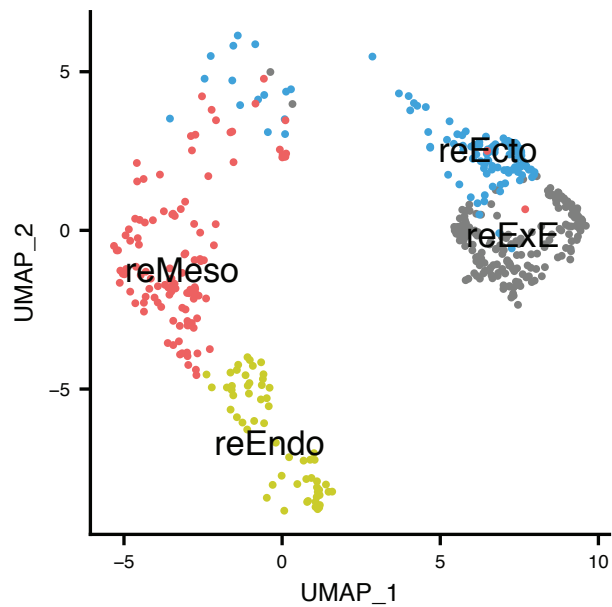

B

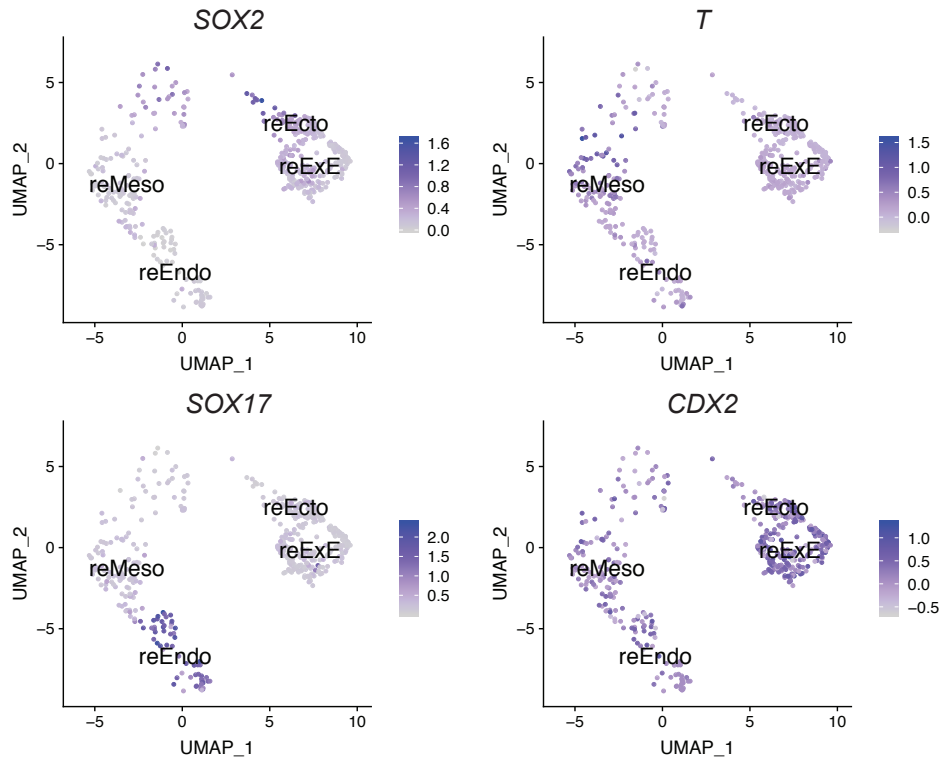

Supplement: supp [file elife-59445-supp-v1.zip › elife_poa_e59445_Figure_8_figure_supplement_3.pdf]

Figure 8—figure supplement 4

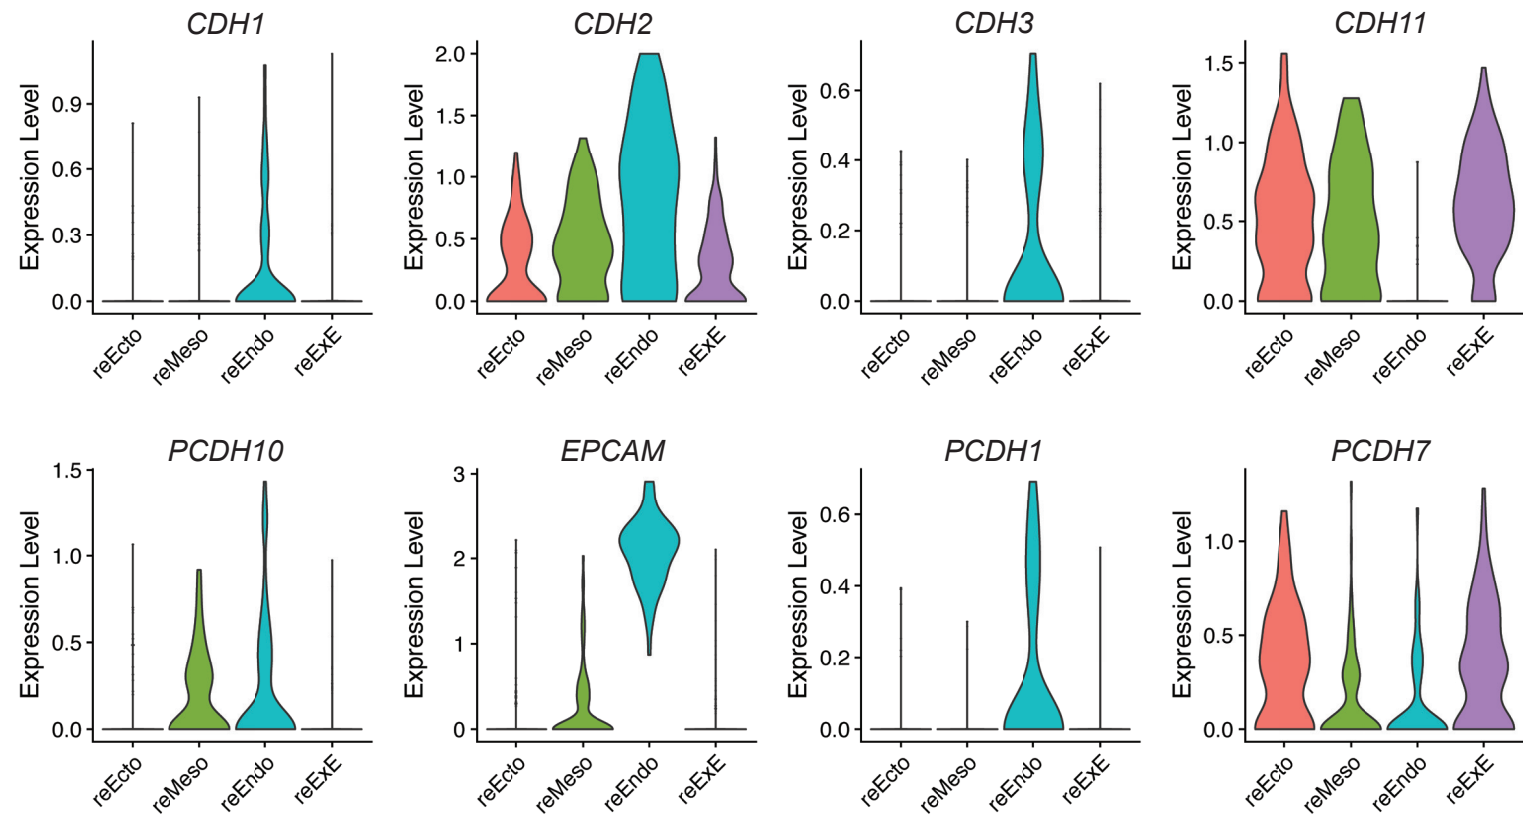

Supplement: supp [file elife-59445-supp-v1.zip › elife_poa_e59445_Figure_8_figure_supplement_4.pdf]

Figure 8—figure supplement 5

A

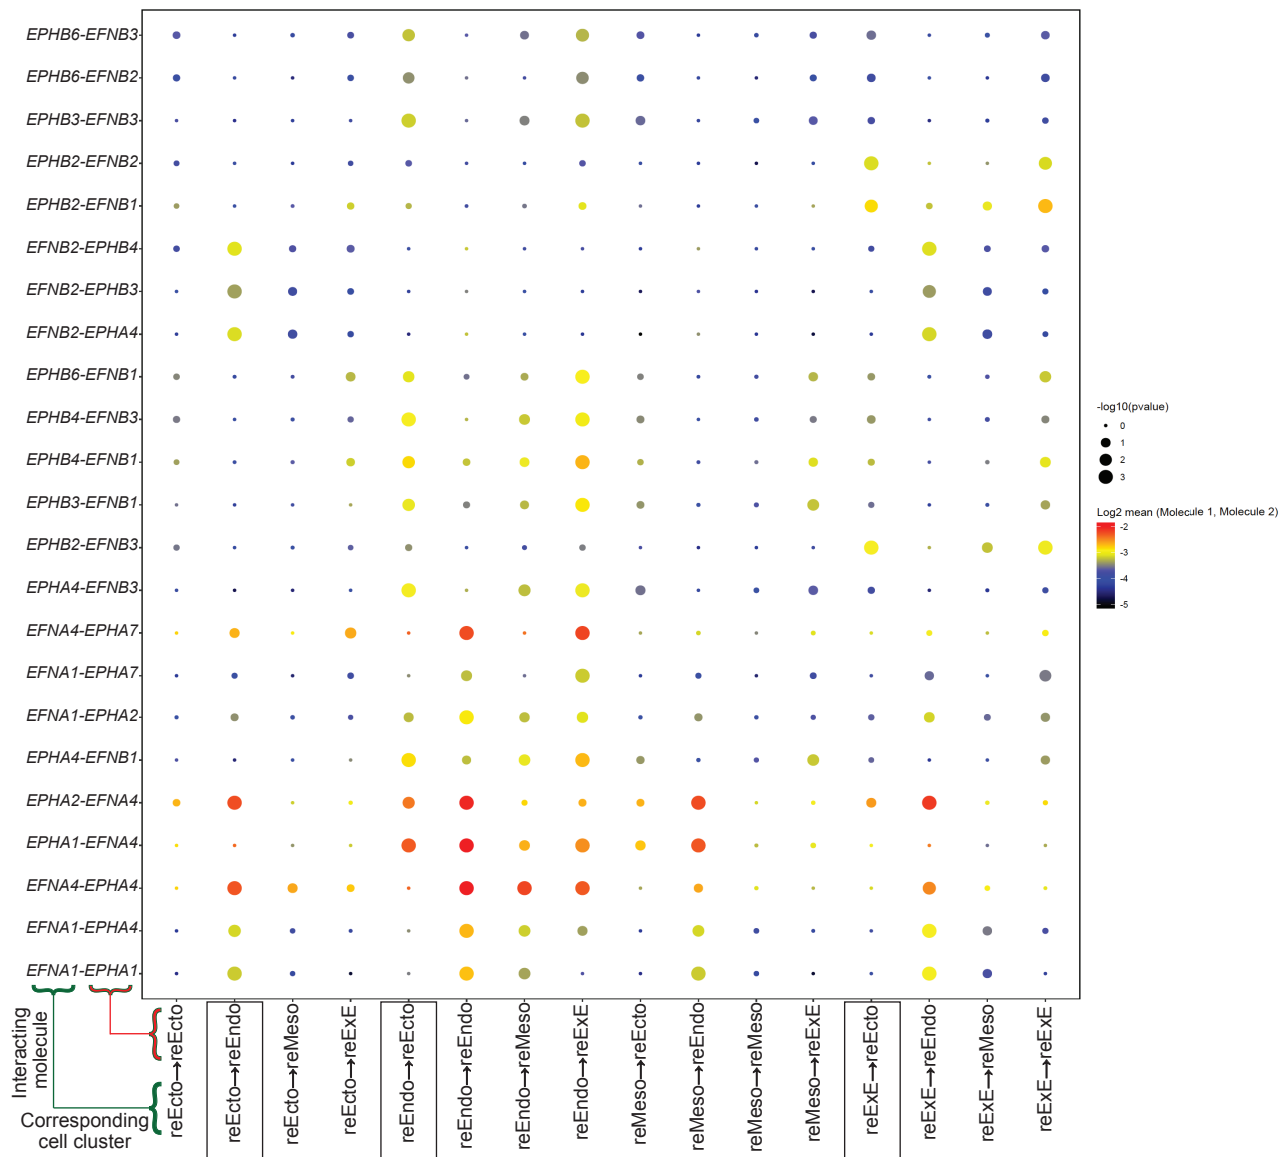

B

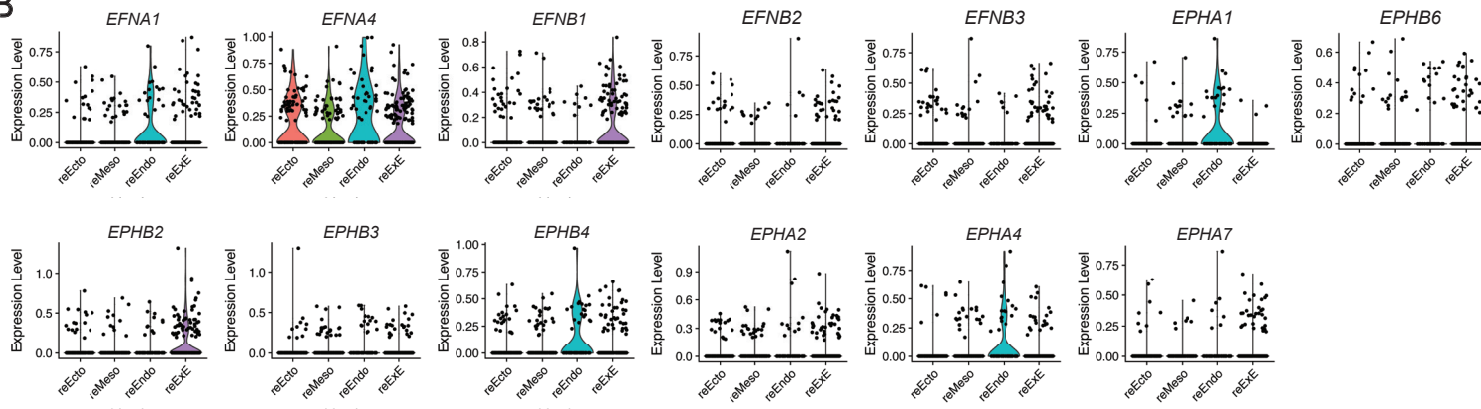

Supplement: supp [file elife-59445-supp-v1.zip › elife_poa_e59445_Figure_8_figure_supplement_5.pdf]
